# Supplementary material
Source: publisher figshare collection journal article supplement (https://sage.figshare.com/ndownloader/files/30409910)
Supplement: Supplementary file 5 [file 30409910]

Archive with 16 entries (15 files):
- ./._supplemental-material
- supplemental-material
- supplemental-material/._user-study-analysis_2.pdf
- supplemental-material/user-study-analysis_2.pdf
- supplemental-material/._.Rhistory
- supplemental-material/.Rhistory
- supplemental-material/._user_study_data_2.csv
- supplemental-material/user_study_data_2.csv
- supplemental-material/._user-study-analysis_2.Rmd
- supplemental-material/user-study-analysis_2.Rmd
- supplemental-material/._user_study_data.csv
- supplemental-material/user_study_data.csv
- supplemental-material/._user-study-analysis.pdf
- supplemental-material/user-study-analysis.pdf
- supplemental-material/._user-study-analysis.Rmd
- supplemental-material/user-study-analysis.Rmd
