# Supplementary material
Source: publisher figshare collection journal article supplement (https://sage.figshare.com/ndownloader/files/30409910)
Supplement: Supplementary file 5 [file 30409910 › supplemental-material/user_study_data.csv]

	uid	corr_res	user_res	image1	image2	image3	time_used	eq	window	feature	rule	is_signal	vis_type	test_result	accurate
1	1131a07a-176f-11e8-b122-44a84224eb5b	1	2	signals12St_BHinge_DBE_1_ShearNormalized_14_window0.png	signals12St_BHinge_Serv_1_ShearNormalized_14_window0.png	signals12St_FiberTapSt_DBE_1_ShearNormalized_14_window0.png	4.35	14	0	1_ShearNormalized	3	TRUE	signal	incorrect	FALSE
2	1131a07a-176f-11e8-b122-44a84224eb5b	2	2	signals12St_BHinge_DBE_1_ShearNormalized_25_window2.png	signals12St_FiberConstSt_DBE_1_ShearNormalized_25_window2.png	signals12St_BHinge_DBE_1_ShearNormalized_25_window2.png	3.66	25	2	1_ShearNormalized	0	TRUE	signal	correct	TRUE
3	1131a07a-176f-11e8-b122-44a84224eb5b	2	2	signals12St_FiberConstSt_MCE_1_ShearNormalized_01_window2.png	signals12St_FiberNomSt_DBE_1_ShearNormalized_01_window2.png	signals12St_FiberTapSt_MCE_1_ShearNormalized_01_window2.png	4.98	1	2	1_ShearNormalized	4	TRUE	signal	correct	TRUE
4	1131a07a-176f-11e8-b122-44a84224eb5b	2	1	signals12St_BHinge_DBE_1_ShearNormalized_11_window2.png	signals12St_FiberConstSt_DBE_1_ShearNormalized_11_window2.png	signals12St_BHinge_MCE_1_ShearNormalized_11_window2.png	3.12	11	2	1_ShearNormalized	1	TRUE	signal	incorrect	FALSE
5	1131a07a-176f-11e8-b122-44a84224eb5b	1	1	signals12St_FiberTapSt_Serv_1_ShearNormalized_43_window1.png	signals12St_FiberConstSt_Serv_1_ShearNormalized_43_window1.png	signals12St_FiberNomSt_DBE_1_ShearNormalized_43_window1.png	2.52	43	1	1_ShearNormalized	2	TRUE	signal	correct	TRUE
6	1131a07a-176f-11e8-b122-44a84224eb5b	2	2	topics5_12St_FiberTapSt_Serv_1_ShearNormalized_43_window1.png	topics5_12St_FiberNomSt_DBE_1_ShearNormalized_43_window1.png	topics5_12St_FiberConstSt_Serv_1_ShearNormalized_43_window1.png	3.18	43	1	1_ShearNormalized	2	FALSE	topic	correct	TRUE
7	1131a07a-176f-11e8-b122-44a84224eb5b	1	1	topics5_12St_BHinge_DBE_1_ShearNormalized_44_window2.png	topics5_12St_BHinge_DBE_1_ShearNormalized_44_window2.png	topics5_12St_FiberNomSt_DBE_1_ShearNormalized_44_window2.png	2.8	44	2	1_ShearNormalized	0	FALSE	topic	correct	TRUE
8	1131a07a-176f-11e8-b122-44a84224eb5b	1	1	topics5_12St_FiberConstSt_MCE_1_ShearNormalized_01_window2.png	topics5_12St_FiberTapSt_MCE_1_ShearNormalized_01_window2.png	topics5_12St_FiberNomSt_DBE_1_ShearNormalized_01_window2.png	5.36	1	2	1_ShearNormalized	4	FALSE	topic	correct	TRUE
9	1131a07a-176f-11e8-b122-44a84224eb5b	1	2	signals12St_BHinge_Serv_1_ShearNormalized_21_window0.png	signals12St_BHinge_DBE_1_ShearNormalized_21_window0.png	signals12St_FiberConstSt_Serv_1_ShearNormalized_21_window0.png	2.37	21	0	1_ShearNormalized	3	TRUE	signal	incorrect	FALSE
10	1131a07a-176f-11e8-b122-44a84224eb5b	2	1	topics5_12St_BHinge_Serv_1_ShearNormalized_21_window0.png	topics5_12St_FiberConstSt_Serv_1_ShearNormalized_21_window0.png	topics5_12St_BHinge_DBE_1_ShearNormalized_21_window0.png	3.78	21	0	1_ShearNormalized	3	FALSE	topic	incorrect	FALSE
11	1131a07a-176f-11e8-b122-44a84224eb5b	1	1	topics5_12St_FiberTapSt_MCE_1_ShearNormalized_17_window2.png	topics5_12St_FiberConstSt_MCE_1_ShearNormalized_17_window2.png	topics5_12St_FiberNomSt_DBE_1_ShearNormalized_17_window2.png	4.26	17	2	1_ShearNormalized	4	FALSE	topic	correct	TRUE
12	1131a07a-176f-11e8-b122-44a84224eb5b	1	2	signals12St_FiberTapSt_Serv_1_ShearNormalized_31_window0.png	signals12St_FiberConstSt_Serv_1_ShearNormalized_31_window0.png	signals12St_FiberNomSt_DBE_1_ShearNormalized_31_window0.png	2.44	31	0	1_ShearNormalized	2	TRUE	signal	incorrect	FALSE
13	1131a07a-176f-11e8-b122-44a84224eb5b	2	2	topics5_12St_BHinge_Serv_1_ShearNormalized_40_window2.png	topics5_12St_FiberNomSt_Serv_1_ShearNormalized_40_window2.png	topics5_12St_BHinge_DBE_1_ShearNormalized_40_window2.png	2.46	40	2	1_ShearNormalized	3	FALSE	topic	correct	TRUE
14	1131a07a-176f-11e8-b122-44a84224eb5b	2	1	signals12St_BHinge_DBE_1_ShearNormalized_14_window2.png	signals12St_FiberConstSt_DBE_1_ShearNormalized_14_window2.png	signals12St_BHinge_MCE_1_ShearNormalized_14_window2.png	2.57	14	2	1_ShearNormalized	1	TRUE	signal	incorrect	FALSE
15	1131a07a-176f-11e8-b122-44a84224eb5b	2	2	signals12St_BHinge_MCE_1_ShearNormalized_41_window0.png	signals12St_FiberNomSt_MCE_1_ShearNormalized_41_window0.png	signals12St_BHinge_DBE_1_ShearNormalized_41_window0.png	2.59	41	0	1_ShearNormalized	1	TRUE	signal	correct	TRUE
16	1131a07a-176f-11e8-b122-44a84224eb5b	2	2	topics5_12St_FiberNomSt_Serv_1_ShearNormalized_34_window0.png	topics5_12St_FiberTapSt_MCE_1_ShearNormalized_34_window0.png	topics5_12St_FiberConstSt_Serv_1_ShearNormalized_34_window0.png	2.57	34	0	1_ShearNormalized	2	FALSE	topic	correct	TRUE
17	1131a07a-176f-11e8-b122-44a84224eb5b	1	1	topics5_12St_FiberConstSt_MCE_1_ShearNormalized_33_window1.png	topics5_12St_FiberTapSt_MCE_1_ShearNormalized_33_window1.png	topics5_12St_FiberNomSt_DBE_1_ShearNormalized_33_window1.png	3.16	33	1	1_ShearNormalized	4	FALSE	topic	correct	TRUE
18	1131a07a-176f-11e8-b122-44a84224eb5b	2	2	signals12St_BHinge_DBE_1_ShearNormalized_44_window2.png	signals12St_FiberNomSt_DBE_1_ShearNormalized_44_window2.png	signals12St_BHinge_DBE_1_ShearNormalized_44_window2.png	2.52	44	2	1_ShearNormalized	0	TRUE	signal	correct	TRUE
19	1131a07a-176f-11e8-b122-44a84224eb5b	1	1	topics5_12St_BHinge_DBE_1_ShearNormalized_14_window2.png	topics5_12St_BHinge_MCE_1_ShearNormalized_14_window2.png	topics5_12St_FiberConstSt_DBE_1_ShearNormalized_14_window2.png	2.27	14	2	1_ShearNormalized	1	FALSE	topic	correct	TRUE
20	1131a07a-176f-11e8-b122-44a84224eb5b	1	1	topics5_12St_BHinge_MCE_1_ShearNormalized_41_window0.png	topics5_12St_BHinge_DBE_1_ShearNormalized_41_window0.png	topics5_12St_FiberNomSt_MCE_1_ShearNormalized_41_window0.png	2.61	41	0	1_ShearNormalized	1	FALSE	topic	correct	TRUE
21	1131a07a-176f-11e8-b122-44a84224eb5b	1	2	signals12St_BHinge_Serv_1_ShearNormalized_40_window2.png	signals12St_BHinge_DBE_1_ShearNormalized_40_window2.png	signals12St_FiberNomSt_Serv_1_ShearNormalized_40_window2.png	3.11	40	2	1_ShearNormalized	3	TRUE	signal	incorrect	FALSE
22	1131a07a-176f-11e8-b122-44a84224eb5b	2	2	signals12St_FiberConstSt_MCE_1_ShearNormalized_33_window1.png	signals12St_FiberNomSt_DBE_1_ShearNormalized_33_window1.png	signals12St_FiberTapSt_MCE_1_ShearNormalized_33_window1.png	2.4	33	1	1_ShearNormalized	4	TRUE	signal	correct	TRUE
23	1131a07a-176f-11e8-b122-44a84224eb5b	1	1	signals12St_FiberNomSt_Serv_1_ShearNormalized_34_window0.png	signals12St_FiberConstSt_Serv_1_ShearNormalized_34_window0.png	signals12St_FiberTapSt_MCE_1_ShearNormalized_34_window0.png	3.06	34	0	1_ShearNormalized	2	TRUE	signal	correct	TRUE
24	1131a07a-176f-11e8-b122-44a84224eb5b	2	2	topics5_12St_BHinge_DBE_1_ShearNormalized_14_window0.png	topics5_12St_FiberTapSt_DBE_1_ShearNormalized_14_window0.png	topics5_12St_BHinge_Serv_1_ShearNormalized_14_window0.png	1.92	14	0	1_ShearNormalized	3	FALSE	topic	correct	TRUE
25	1131a07a-176f-11e8-b122-44a84224eb5b	1	1	topics5_12St_BHinge_DBE_1_ShearNormalized_11_window2.png	topics5_12St_BHinge_MCE_1_ShearNormalized_11_window2.png	topics5_12St_FiberConstSt_DBE_1_ShearNormalized_11_window2.png	2.4	11	2	1_ShearNormalized	1	FALSE	topic	correct	TRUE
26	1131a07a-176f-11e8-b122-44a84224eb5b	2	1	topics5_12St_BHinge_DBE_1_ShearNormalized_30_window2.png	topics5_12St_FiberTapSt_DBE_1_ShearNormalized_30_window2.png	topics5_12St_BHinge_Serv_1_ShearNormalized_30_window2.png	3.95	30	2	1_ShearNormalized	3	FALSE	topic	incorrect	FALSE
27	1131a07a-176f-11e8-b122-44a84224eb5b	1	1	topics5_12St_BHinge_DBE_1_ShearNormalized_25_window2.png	topics5_12St_BHinge_DBE_1_ShearNormalized_25_window2.png	topics5_12St_FiberConstSt_DBE_1_ShearNormalized_25_window2.png	2.05	25	2	1_ShearNormalized	0	FALSE	topic	correct	TRUE
28	1131a07a-176f-11e8-b122-44a84224eb5b	1	2	signals12St_BHinge_DBE_1_ShearNormalized_30_window2.png	signals12St_BHinge_Serv_1_ShearNormalized_30_window2.png	signals12St_FiberTapSt_DBE_1_ShearNormalized_30_window2.png	2.53	30	2	1_ShearNormalized	3	TRUE	signal	incorrect	FALSE
29	1131a07a-176f-11e8-b122-44a84224eb5b	2	2	topics5_12St_FiberTapSt_Serv_1_ShearNormalized_32_window2.png	topics5_12St_FiberNomSt_DBE_1_ShearNormalized_32_window2.png	topics5_12St_FiberConstSt_Serv_1_ShearNormalized_32_window2.png	4.5	32	2	1_ShearNormalized	2	FALSE	topic	correct	TRUE
30	1131a07a-176f-11e8-b122-44a84224eb5b	1	1	signals12St_FiberTapSt_Serv_1_ShearNormalized_32_window2.png	signals12St_FiberConstSt_Serv_1_ShearNormalized_32_window2.png	signals12St_FiberNomSt_DBE_1_ShearNormalized_32_window2.png	2.58	32	2	1_ShearNormalized	2	TRUE	signal	correct	TRUE
31	1131a07a-176f-11e8-b122-44a84224eb5b	2	2	topics5_12St_FiberNomSt_Serv_1_ShearNormalized_34_window2.png	topics5_12St_FiberTapSt_MCE_1_ShearNormalized_34_window2.png	topics5_12St_FiberConstSt_Serv_1_ShearNormalized_34_window2.png	2.2	34	2	1_ShearNormalized	2	FALSE	topic	correct	TRUE
32	1131a07a-176f-11e8-b122-44a84224eb5b	1	1	signals12St_FiberNomSt_Serv_1_ShearNormalized_34_window2.png	signals12St_FiberConstSt_Serv_1_ShearNormalized_34_window2.png	signals12St_FiberTapSt_MCE_1_ShearNormalized_34_window2.png	2.63	34	2	1_ShearNormalized	2	TRUE	signal	correct	TRUE
33	1131a07a-176f-11e8-b122-44a84224eb5b	2	2	signals12St_FiberTapSt_MCE_1_ShearNormalized_17_window2.png	signals12St_FiberNomSt_DBE_1_ShearNormalized_17_window2.png	signals12St_FiberConstSt_MCE_1_ShearNormalized_17_window2.png	2.5	17	2	1_ShearNormalized	4	TRUE	signal	correct	TRUE
34	1131a07a-176f-11e8-b122-44a84224eb5b	2	2	topics5_12St_FiberTapSt_Serv_1_ShearNormalized_31_window0.png	topics5_12St_FiberNomSt_DBE_1_ShearNormalized_31_window0.png	topics5_12St_FiberConstSt_Serv_1_ShearNormalized_31_window0.png	2.8	31	0	1_ShearNormalized	2	FALSE	topic	correct	TRUE
35	12c0384a-1727-11e8-b122-44a84224eb5b	2	1	signals12St_BHinge_DBE_1_ShearNormalized_39_window1.png	signals12St_FiberTapSt_DBE_1_ShearNormalized_39_window1.png	signals12St_BHinge_MCE_1_ShearNormalized_39_window1.png	2.79	39	1	1_ShearNormalized	1	TRUE	signal	incorrect	FALSE
36	12c0384a-1727-11e8-b122-44a84224eb5b	2	2	signals12St_FiberTapSt_MCE_1_ShearNormalized_10_window0.png	signals12St_FiberNomSt_DBE_1_ShearNormalized_10_window0.png	signals12St_FiberConstSt_MCE_1_ShearNormalized_10_window0.png	6.16	10	0	1_ShearNormalized	4	TRUE	signal	correct	TRUE
37	12c0384a-1727-11e8-b122-44a84224eb5b	2	2	topics5_12St_FiberNomSt_Serv_1_ShearNormalized_11_window2.png	topics5_12St_FiberTapSt_MCE_1_ShearNormalized_11_window2.png	topics5_12St_FiberConstSt_Serv_1_ShearNormalized_11_window2.png	1.31	11	2	1_ShearNormalized	2	FALSE	topic	correct	TRUE
38	12c0384a-1727-11e8-b122-44a84224eb5b	1	1	topics5_12St_BHinge_MCE_1_ShearNormalized_11_window0.png	topics5_12St_BHinge_MCE_1_ShearNormalized_11_window0.png	topics5_12St_FiberTapSt_MCE_1_ShearNormalized_11_window0.png	2.11	11	0	1_ShearNormalized	0	FALSE	topic	correct	TRUE
39	12c0384a-1727-11e8-b122-44a84224eb5b	2	2	signals12St_BHinge_MCE_1_ShearNormalized_17_window1.png	signals12St_FiberTapSt_MCE_1_ShearNormalized_17_window1.png	signals12St_BHinge_DBE_1_ShearNormalized_17_window1.png	3.21	17	1	1_ShearNormalized	1	TRUE	signal	correct	TRUE
40	12c0384a-1727-11e8-b122-44a84224eb5b	2	2	topics5_12St_FiberNomSt_Serv_1_ShearNormalized_16_window1.png	topics5_12St_FiberConstSt_MCE_1_ShearNormalized_16_window1.png	topics5_12St_FiberTapSt_Serv_1_ShearNormalized_16_window1.png	2.28	16	1	1_ShearNormalized	2	FALSE	topic	correct	TRUE
41	12c0384a-1727-11e8-b122-44a84224eb5b	2	2	signals12St_FiberNomSt_MCE_1_ShearNormalized_13_window2.png	signals12St_FiberConstSt_DBE_1_ShearNormalized_13_window2.png	signals12St_FiberTapSt_MCE_1_ShearNormalized_13_window2.png	2.72	13	2	1_ShearNormalized	4	TRUE	signal	correct	TRUE
42	12c0384a-1727-11e8-b122-44a84224eb5b	2	2	signals12St_BHinge_DBE_1_ShearNormalized_16_window0.png	signals12St_FiberConstSt_DBE_1_ShearNormalized_16_window0.png	signals12St_BHinge_DBE_1_ShearNormalized_16_window0.png	3.28	16	0	1_ShearNormalized	0	TRUE	signal	correct	TRUE
43	12c0384a-1727-11e8-b122-44a84224eb5b	1	1	topics5_12St_FiberNomSt_MCE_1_ShearNormalized_13_window2.png	topics5_12St_FiberTapSt_MCE_1_ShearNormalized_13_window2.png	topics5_12St_FiberConstSt_DBE_1_ShearNormalized_13_window2.png	7.05	13	2	1_ShearNormalized	4	FALSE	topic	correct	TRUE
44	12c0384a-1727-11e8-b122-44a84224eb5b	1	1	topics5_12St_BHinge_DBE_1_ShearNormalized_27_window1.png	topics5_12St_BHinge_MCE_1_ShearNormalized_27_window1.png	topics5_12St_FiberTapSt_DBE_1_ShearNormalized_27_window1.png	1.5	27	1	1_ShearNormalized	1	FALSE	topic	correct	TRUE
45	12c0384a-1727-11e8-b122-44a84224eb5b	1	1	topics5_12St_BHinge_DBE_1_ShearNormalized_39_window1.png	topics5_12St_BHinge_MCE_1_ShearNormalized_39_window1.png	topics5_12St_FiberTapSt_DBE_1_ShearNormalized_39_window1.png	2.07	39	1	1_ShearNormalized	1	FALSE	topic	correct	TRUE
46	12c0384a-1727-11e8-b122-44a84224eb5b	2	2	signals12St_BHinge_DBE_1_ShearNormalized_27_window1.png	signals12St_FiberTapSt_DBE_1_ShearNormalized_27_window1.png	signals12St_BHinge_MCE_1_ShearNormalized_27_window1.png	9.31	27	1	1_ShearNormalized	1	TRUE	signal	correct	TRUE
47	12c0384a-1727-11e8-b122-44a84224eb5b	1	1	signals12St_FiberNomSt_Serv_1_ShearNormalized_16_window1.png	signals12St_FiberTapSt_Serv_1_ShearNormalized_16_window1.png	signals12St_FiberConstSt_MCE_1_ShearNormalized_16_window1.png	2.7	16	1	1_ShearNormalized	2	TRUE	signal	correct	TRUE
48	12c0384a-1727-11e8-b122-44a84224eb5b	1	2	signals12St_BHinge_DBE_1_ShearNormalized_45_window1.png	signals12St_BHinge_Serv_1_ShearNormalized_45_window1.png	signals12St_FiberNomSt_DBE_1_ShearNormalized_45_window1.png	6.37	45	1	1_ShearNormalized	3	TRUE	signal	incorrect	FALSE
49	12c0384a-1727-11e8-b122-44a84224eb5b	2	2	topics5_12St_FiberTapSt_Serv_1_ShearNormalized_35_window1.png	topics5_12St_FiberNomSt_DBE_1_ShearNormalized_35_window1.png	topics5_12St_FiberConstSt_Serv_1_ShearNormalized_35_window1.png	1.39	35	1	1_ShearNormalized	2	FALSE	topic	correct	TRUE
50	12c0384a-1727-11e8-b122-44a84224eb5b	1	1	signals12St_FiberConstSt_Serv_1_ShearNormalized_27_window2.png	signals12St_FiberNomSt_Serv_1_ShearNormalized_27_window2.png	signals12St_FiberTapSt_MCE_1_ShearNormalized_27_window2.png	2.59	27	2	1_ShearNormalized	2	TRUE	signal	correct	TRUE
51	12c0384a-1727-11e8-b122-44a84224eb5b	1	1	topics5_12St_BHinge_DBE_1_ShearNormalized_35_window2.png	topics5_12St_BHinge_MCE_1_ShearNormalized_35_window2.png	topics5_12St_FiberNomSt_DBE_1_ShearNormalized_35_window2.png	1.26	35	2	1_ShearNormalized	1	FALSE	topic	correct	TRUE
52	12c0384a-1727-11e8-b122-44a84224eb5b	1	1	signals12St_FiberNomSt_Serv_1_ShearNormalized_11_window2.png	signals12St_FiberConstSt_Serv_1_ShearNormalized_11_window2.png	signals12St_FiberTapSt_MCE_1_ShearNormalized_11_window2.png	2.14	11	2	1_ShearNormalized	2	TRUE	signal	correct	TRUE
53	12c0384a-1727-11e8-b122-44a84224eb5b	2	2	signals12St_BHinge_DBE_1_ShearNormalized_35_window2.png	signals12St_FiberNomSt_DBE_1_ShearNormalized_35_window2.png	signals12St_BHinge_MCE_1_ShearNormalized_35_window2.png	5.19	35	2	1_ShearNormalized	1	TRUE	signal	correct	TRUE
54	12c0384a-1727-11e8-b122-44a84224eb5b	1	1	signals12St_FiberConstSt_Serv_1_ShearNormalized_18_window1.png	signals12St_FiberTapSt_Serv_1_ShearNormalized_18_window1.png	signals12St_FiberNomSt_MCE_1_ShearNormalized_18_window1.png	1.79	18	1	1_ShearNormalized	2	TRUE	signal	correct	TRUE
55	12c0384a-1727-11e8-b122-44a84224eb5b	1	2	signals12St_BHinge_DBE_1_ShearNormalized_12_window2.png	signals12St_BHinge_Serv_1_ShearNormalized_12_window2.png	signals12St_FiberNomSt_DBE_1_ShearNormalized_12_window2.png	6.19	12	2	1_ShearNormalized	3	TRUE	signal	incorrect	FALSE
56	12c0384a-1727-11e8-b122-44a84224eb5b	2	2	topics5_12St_BHinge_DBE_1_ShearNormalized_45_window1.png	topics5_12St_FiberNomSt_DBE_1_ShearNormalized_45_window1.png	topics5_12St_BHinge_Serv_1_ShearNormalized_45_window1.png	4.67	45	1	1_ShearNormalized	3	FALSE	topic	correct	TRUE
57	12c0384a-1727-11e8-b122-44a84224eb5b	2	2	topics5_12St_BHinge_DBE_1_ShearNormalized_12_window2.png	topics5_12St_FiberNomSt_DBE_1_ShearNormalized_12_window2.png	topics5_12St_BHinge_Serv_1_ShearNormalized_12_window2.png	1.83	12	2	1_ShearNormalized	3	FALSE	topic	correct	TRUE
58	12c0384a-1727-11e8-b122-44a84224eb5b	1	1	topics5_12St_BHinge_MCE_1_ShearNormalized_17_window1.png	topics5_12St_BHinge_DBE_1_ShearNormalized_17_window1.png	topics5_12St_FiberTapSt_MCE_1_ShearNormalized_17_window1.png	2.01	17	1	1_ShearNormalized	1	FALSE	topic	correct	TRUE
59	12c0384a-1727-11e8-b122-44a84224eb5b	1	1	topics5_12St_BHinge_DBE_1_ShearNormalized_16_window0.png	topics5_12St_BHinge_DBE_1_ShearNormalized_16_window0.png	topics5_12St_FiberConstSt_DBE_1_ShearNormalized_16_window0.png	1.6	16	0	1_ShearNormalized	0	FALSE	topic	correct	TRUE
60	12c0384a-1727-11e8-b122-44a84224eb5b	1	1	signals12St_FiberTapSt_Serv_1_ShearNormalized_35_window1.png	signals12St_FiberConstSt_Serv_1_ShearNormalized_35_window1.png	signals12St_FiberNomSt_DBE_1_ShearNormalized_35_window1.png	2.1	35	1	1_ShearNormalized	2	TRUE	signal	correct	TRUE
61	12c0384a-1727-11e8-b122-44a84224eb5b	2	2	topics5_12St_FiberConstSt_Serv_1_ShearNormalized_27_window2.png	topics5_12St_FiberTapSt_MCE_1_ShearNormalized_27_window2.png	topics5_12St_FiberNomSt_Serv_1_ShearNormalized_27_window2.png	1.57	27	2	1_ShearNormalized	2	FALSE	topic	correct	TRUE
62	12c0384a-1727-11e8-b122-44a84224eb5b	1	1	topics5_12St_FiberTapSt_MCE_1_ShearNormalized_10_window0.png	topics5_12St_FiberConstSt_MCE_1_ShearNormalized_10_window0.png	topics5_12St_FiberNomSt_DBE_1_ShearNormalized_10_window0.png	6.4	10	0	1_ShearNormalized	4	FALSE	topic	correct	TRUE
63	12c0384a-1727-11e8-b122-44a84224eb5b	1	1	signals12St_FiberNomSt_Serv_1_ShearNormalized_07_window0.png	signals12St_FiberConstSt_Serv_1_ShearNormalized_07_window0.png	signals12St_FiberTapSt_MCE_1_ShearNormalized_07_window0.png	5.12	7	0	1_ShearNormalized	2	TRUE	signal	correct	TRUE
64	12c0384a-1727-11e8-b122-44a84224eb5b	1	1	topics5_12St_BHinge_DBE_1_ShearNormalized_38_window1.png	topics5_12St_BHinge_MCE_1_ShearNormalized_38_window1.png	topics5_12St_FiberNomSt_DBE_1_ShearNormalized_38_window1.png	1.63	38	1	1_ShearNormalized	1	FALSE	topic	correct	TRUE
65	12c0384a-1727-11e8-b122-44a84224eb5b	2	2	topics5_12St_FiberConstSt_Serv_1_ShearNormalized_18_window1.png	topics5_12St_FiberNomSt_MCE_1_ShearNormalized_18_window1.png	topics5_12St_FiberTapSt_Serv_1_ShearNormalized_18_window1.png	2.84	18	1	1_ShearNormalized	2	FALSE	topic	correct	TRUE
66	12c0384a-1727-11e8-b122-44a84224eb5b	2	2	topics5_12St_FiberNomSt_Serv_1_ShearNormalized_07_window0.png	topics5_12St_FiberTapSt_MCE_1_ShearNormalized_07_window0.png	topics5_12St_FiberConstSt_Serv_1_ShearNormalized_07_window0.png	4.64	7	0	1_ShearNormalized	2	FALSE	topic	correct	TRUE
67	12c0384a-1727-11e8-b122-44a84224eb5b	2	1	signals12St_BHinge_DBE_1_ShearNormalized_38_window1.png	signals12St_FiberNomSt_DBE_1_ShearNormalized_38_window1.png	signals12St_BHinge_MCE_1_ShearNormalized_38_window1.png	5.07	38	1	1_ShearNormalized	1	TRUE	signal	incorrect	FALSE
68	12c0384a-1727-11e8-b122-44a84224eb5b	2	2	signals12St_BHinge_MCE_1_ShearNormalized_11_window0.png	signals12St_FiberTapSt_MCE_1_ShearNormalized_11_window0.png	signals12St_BHinge_MCE_1_ShearNormalized_11_window0.png	4.01	11	0	1_ShearNormalized	0	TRUE	signal	correct	TRUE
69	2f146e98-187c-11e8-b122-44a84224eb5b	2	2	topics5_12St_BHinge_DBE_1_ShearNormalized_09_window1.png	topics5_12St_FiberNomSt_DBE_1_ShearNormalized_09_window1.png	topics5_12St_BHinge_Serv_1_ShearNormalized_09_window1.png	4.42	9	1	1_ShearNormalized	3	FALSE	topic	correct	TRUE
70	2f146e98-187c-11e8-b122-44a84224eb5b	1	1	signals12St_BHinge_MCE_1_ShearNormalized_39_window1.png	signals12St_BHinge_Serv_1_ShearNormalized_39_window1.png	signals12St_FiberTapSt_MCE_1_ShearNormalized_39_window1.png	5.18	39	1	1_ShearNormalized	3	TRUE	signal	correct	TRUE
71	2f146e98-187c-11e8-b122-44a84224eb5b	1	1	topics5_12St_BHinge_MCE_1_ShearNormalized_18_window2.png	topics5_12St_BHinge_MCE_1_ShearNormalized_18_window2.png	topics5_12St_FiberNomSt_MCE_1_ShearNormalized_18_window2.png	2.3	18	2	1_ShearNormalized	0	FALSE	topic	correct	TRUE
72	2f146e98-187c-11e8-b122-44a84224eb5b	1	1	topics5_12St_FiberConstSt_MCE_1_ShearNormalized_38_window1.png	topics5_12St_FiberNomSt_MCE_1_ShearNormalized_38_window1.png	topics5_12St_FiberTapSt_DBE_1_ShearNormalized_38_window1.png	6.3	38	1	1_ShearNormalized	4	FALSE	topic	correct	TRUE
73	2f146e98-187c-11e8-b122-44a84224eb5b	2	2	signals12St_FiberNomSt_MCE_1_ShearNormalized_39_window1.png	signals12St_FiberTapSt_DBE_1_ShearNormalized_39_window1.png	signals12St_FiberConstSt_MCE_1_ShearNormalized_39_window1.png	4.23	39	1	1_ShearNormalized	4	TRUE	signal	correct	TRUE
74	2f146e98-187c-11e8-b122-44a84224eb5b	2	1	topics5_12St_BHinge_MCE_1_ShearNormalized_39_window1.png	topics5_12St_FiberTapSt_MCE_1_ShearNormalized_39_window1.png	topics5_12St_BHinge_Serv_1_ShearNormalized_39_window1.png	8	39	1	1_ShearNormalized	3	FALSE	topic	incorrect	FALSE
75	2f146e98-187c-11e8-b122-44a84224eb5b	1	1	signals12St_BHinge_DBE_1_ShearNormalized_46_window0.png	signals12St_BHinge_Serv_1_ShearNormalized_46_window0.png	signals12St_FiberNomSt_DBE_1_ShearNormalized_46_window0.png	2.61	46	0	1_ShearNormalized	3	TRUE	signal	correct	TRUE
76	2f146e98-187c-11e8-b122-44a84224eb5b	1	1	signals12St_BHinge_DBE_1_ShearNormalized_09_window1.png	signals12St_BHinge_Serv_1_ShearNormalized_09_window1.png	signals12St_FiberNomSt_DBE_1_ShearNormalized_09_window1.png	8.81	9	1	1_ShearNormalized	3	TRUE	signal	correct	TRUE
77	2f146e98-187c-11e8-b122-44a84224eb5b	2	2	topics5_12St_BHinge_DBE_1_ShearNormalized_46_window0.png	topics5_12St_FiberNomSt_DBE_1_ShearNormalized_46_window0.png	topics5_12St_BHinge_Serv_1_ShearNormalized_46_window0.png	3.76	46	0	1_ShearNormalized	3	FALSE	topic	correct	TRUE
78	2f146e98-187c-11e8-b122-44a84224eb5b	1	1	topics5_12St_BHinge_DBE_1_ShearNormalized_02_window0.png	topics5_12St_BHinge_DBE_1_ShearNormalized_02_window0.png	topics5_12St_FiberTapSt_DBE_1_ShearNormalized_02_window0.png	3.59	2	0	1_ShearNormalized	0	FALSE	topic	correct	TRUE
79	2f146e98-187c-11e8-b122-44a84224eb5b	1	2	topics5_12St_BHinge_DBE_1_ShearNormalized_29_window1.png	topics5_12St_BHinge_MCE_1_ShearNormalized_29_window1.png	topics5_12St_FiberNomSt_DBE_1_ShearNormalized_29_window1.png	12.13	29	1	1_ShearNormalized	1	FALSE	topic	incorrect	FALSE
80	2f146e98-187c-11e8-b122-44a84224eb5b	2	1	topics5_12St_FiberTapSt_Serv_1_ShearNormalized_32_window2.png	topics5_12St_FiberNomSt_DBE_1_ShearNormalized_32_window2.png	topics5_12St_FiberConstSt_Serv_1_ShearNormalized_32_window2.png	7.63	32	2	1_ShearNormalized	2	FALSE	topic	incorrect	FALSE
81	2f146e98-187c-11e8-b122-44a84224eb5b	2	2	signals12St_BHinge_DBE_1_ShearNormalized_29_window1.png	signals12St_FiberNomSt_DBE_1_ShearNormalized_29_window1.png	signals12St_BHinge_MCE_1_ShearNormalized_29_window1.png	10.15	29	1	1_ShearNormalized	1	TRUE	signal	correct	TRUE
82	2f146e98-187c-11e8-b122-44a84224eb5b	1	1	topics5_12St_FiberTapSt_MCE_1_ShearNormalized_21_window1.png	topics5_12St_FiberNomSt_MCE_1_ShearNormalized_21_window1.png	topics5_12St_FiberConstSt_DBE_1_ShearNormalized_21_window1.png	9.07	21	1	1_ShearNormalized	4	FALSE	topic	correct	TRUE
83	2f146e98-187c-11e8-b122-44a84224eb5b	2	2	signals12St_FiberTapSt_MCE_1_ShearNormalized_21_window1.png	signals12St_FiberConstSt_DBE_1_ShearNormalized_21_window1.png	signals12St_FiberNomSt_MCE_1_ShearNormalized_21_window1.png	3.71	21	1	1_ShearNormalized	4	TRUE	signal	correct	TRUE
84	2f146e98-187c-11e8-b122-44a84224eb5b	2	2	signals12St_BHinge_MCE_1_ShearNormalized_18_window2.png	signals12St_FiberNomSt_MCE_1_ShearNormalized_18_window2.png	signals12St_BHinge_MCE_1_ShearNormalized_18_window2.png	13.44	18	2	1_ShearNormalized	0	TRUE	signal	correct	TRUE
85	2f146e98-187c-11e8-b122-44a84224eb5b	2	2	topics5_12St_FiberTapSt_Serv_1_ShearNormalized_44_window0.png	topics5_12St_FiberConstSt_MCE_1_ShearNormalized_44_window0.png	topics5_12St_FiberNomSt_Serv_1_ShearNormalized_44_window0.png	4.04	44	0	1_ShearNormalized	2	FALSE	topic	correct	TRUE
86	2f146e98-187c-11e8-b122-44a84224eb5b	1	1	signals12St_FiberTapSt_Serv_1_ShearNormalized_30_window1.png	signals12St_FiberConstSt_Serv_1_ShearNormalized_30_window1.png	signals12St_FiberNomSt_MCE_1_ShearNormalized_30_window1.png	3.11	30	1	1_ShearNormalized	2	TRUE	signal	correct	TRUE
87	2f146e98-187c-11e8-b122-44a84224eb5b	2	2	topics5_12St_FiberNomSt_Serv_1_ShearNormalized_36_window0.png	topics5_12St_FiberTapSt_DBE_1_ShearNormalized_36_window0.png	topics5_12St_FiberConstSt_Serv_1_ShearNormalized_36_window0.png	7.92	36	0	1_ShearNormalized	2	FALSE	topic	correct	TRUE
88	2f146e98-187c-11e8-b122-44a84224eb5b	1	1	signals12St_FiberNomSt_Serv_1_ShearNormalized_36_window0.png	signals12St_FiberConstSt_Serv_1_ShearNormalized_36_window0.png	signals12St_FiberTapSt_DBE_1_ShearNormalized_36_window0.png	6.97	36	0	1_ShearNormalized	2	TRUE	signal	correct	TRUE
89	2f146e98-187c-11e8-b122-44a84224eb5b	1	1	topics5_12St_BHinge_MCE_1_ShearNormalized_06_window1.png	topics5_12St_BHinge_DBE_1_ShearNormalized_06_window1.png	topics5_12St_FiberTapSt_MCE_1_ShearNormalized_06_window1.png	5.98	6	1	1_ShearNormalized	1	FALSE	topic	correct	TRUE
90	2f146e98-187c-11e8-b122-44a84224eb5b	1	1	topics5_12St_FiberTapSt_MCE_1_ShearNormalized_08_window2.png	topics5_12St_FiberConstSt_MCE_1_ShearNormalized_08_window2.png	topics5_12St_FiberNomSt_DBE_1_ShearNormalized_08_window2.png	3.89	8	2	1_ShearNormalized	4	FALSE	topic	correct	TRUE
91	2f146e98-187c-11e8-b122-44a84224eb5b	1	1	signals12St_FiberTapSt_Serv_1_ShearNormalized_32_window2.png	signals12St_FiberConstSt_Serv_1_ShearNormalized_32_window2.png	signals12St_FiberNomSt_DBE_1_ShearNormalized_32_window2.png	4.46	32	2	1_ShearNormalized	2	TRUE	signal	correct	TRUE
92	2f146e98-187c-11e8-b122-44a84224eb5b	1	1	topics5_12St_BHinge_MCE_1_ShearNormalized_23_window0.png	topics5_12St_BHinge_DBE_1_ShearNormalized_23_window0.png	topics5_12St_FiberTapSt_MCE_1_ShearNormalized_23_window0.png	5.08	23	0	1_ShearNormalized	1	FALSE	topic	correct	TRUE
93	2f146e98-187c-11e8-b122-44a84224eb5b	1	1	topics5_12St_FiberNomSt_MCE_1_ShearNormalized_39_window1.png	topics5_12St_FiberConstSt_MCE_1_ShearNormalized_39_window1.png	topics5_12St_FiberTapSt_DBE_1_ShearNormalized_39_window1.png	9.54	39	1	1_ShearNormalized	4	FALSE	topic	correct	TRUE
94	2f146e98-187c-11e8-b122-44a84224eb5b	1	1	topics5_12St_FiberTapSt_MCE_1_ShearNormalized_28_window0.png	topics5_12St_FiberNomSt_MCE_1_ShearNormalized_28_window0.png	topics5_12St_FiberConstSt_DBE_1_ShearNormalized_28_window0.png	5.96	28	0	1_ShearNormalized	4	FALSE	topic	correct	TRUE
95	2f146e98-187c-11e8-b122-44a84224eb5b	2	1	signals12St_BHinge_MCE_1_ShearNormalized_06_window1.png	signals12St_FiberTapSt_MCE_1_ShearNormalized_06_window1.png	signals12St_BHinge_DBE_1_ShearNormalized_06_window1.png	8.92	6	1	1_ShearNormalized	1	TRUE	signal	incorrect	FALSE
96	2f146e98-187c-11e8-b122-44a84224eb5b	2	1	signals12St_BHinge_MCE_1_ShearNormalized_23_window0.png	signals12St_FiberTapSt_MCE_1_ShearNormalized_23_window0.png	signals12St_BHinge_DBE_1_ShearNormalized_23_window0.png	6.85	23	0	1_ShearNormalized	1	TRUE	signal	incorrect	FALSE
97	2f146e98-187c-11e8-b122-44a84224eb5b	2	2	signals12St_FiberConstSt_MCE_1_ShearNormalized_38_window1.png	signals12St_FiberTapSt_DBE_1_ShearNormalized_38_window1.png	signals12St_FiberNomSt_MCE_1_ShearNormalized_38_window1.png	10.86	38	1	1_ShearNormalized	4	TRUE	signal	correct	TRUE
98	2f146e98-187c-11e8-b122-44a84224eb5b	2	2	signals12St_BHinge_DBE_1_ShearNormalized_02_window0.png	signals12St_FiberTapSt_DBE_1_ShearNormalized_02_window0.png	signals12St_BHinge_DBE_1_ShearNormalized_02_window0.png	7.1	2	0	1_ShearNormalized	0	TRUE	signal	correct	TRUE
99	2f146e98-187c-11e8-b122-44a84224eb5b	1	1	signals12St_FiberTapSt_Serv_1_ShearNormalized_44_window0.png	signals12St_FiberNomSt_Serv_1_ShearNormalized_44_window0.png	signals12St_FiberConstSt_MCE_1_ShearNormalized_44_window0.png	4.1	44	0	1_ShearNormalized	2	TRUE	signal	correct	TRUE
100	2f146e98-187c-11e8-b122-44a84224eb5b	2	2	topics5_12St_FiberTapSt_Serv_1_ShearNormalized_30_window1.png	topics5_12St_FiberNomSt_MCE_1_ShearNormalized_30_window1.png	topics5_12St_FiberConstSt_Serv_1_ShearNormalized_30_window1.png	9.72	30	1	1_ShearNormalized	2	FALSE	topic	correct	TRUE
101	2f146e98-187c-11e8-b122-44a84224eb5b	2	2	signals12St_FiberTapSt_MCE_1_ShearNormalized_08_window2.png	signals12St_FiberNomSt_DBE_1_ShearNormalized_08_window2.png	signals12St_FiberConstSt_MCE_1_ShearNormalized_08_window2.png	8.38	8	2	1_ShearNormalized	4	TRUE	signal	correct	TRUE
102	2f146e98-187c-11e8-b122-44a84224eb5b	2	2	signals12St_FiberTapSt_MCE_1_ShearNormalized_28_window0.png	signals12St_FiberConstSt_DBE_1_ShearNormalized_28_window0.png	signals12St_FiberNomSt_MCE_1_ShearNormalized_28_window0.png	8.92	28	0	1_ShearNormalized	4	TRUE	signal	correct	TRUE
103	3bc567b0-1808-11e8-b122-44a84224eb5b	1	1	topics5_12St_FiberNomSt_MCE_1_ShearNormalized_49_window2.png	topics5_12St_FiberConstSt_MCE_1_ShearNormalized_49_window2.png	topics5_12St_FiberTapSt_DBE_1_ShearNormalized_49_window2.png	3.89	49	2	1_ShearNormalized	4	FALSE	topic	correct	TRUE
104	3bc567b0-1808-11e8-b122-44a84224eb5b	1	1	topics5_12St_BHinge_MCE_1_ShearNormalized_28_window2.png	topics5_12St_BHinge_DBE_1_ShearNormalized_28_window2.png	topics5_12St_FiberNomSt_MCE_1_ShearNormalized_28_window2.png	3.64	28	2	1_ShearNormalized	1	FALSE	topic	correct	TRUE
105	3bc567b0-1808-11e8-b122-44a84224eb5b	2	2	signals12St_FiberTapSt_MCE_1_ShearNormalized_03_window2.png	signals12St_FiberConstSt_DBE_1_ShearNormalized_03_window2.png	signals12St_FiberNomSt_MCE_1_ShearNormalized_03_window2.png	5.27	3	2	1_ShearNormalized	4	TRUE	signal	correct	TRUE
106	3bc567b0-1808-11e8-b122-44a84224eb5b	2	2	signals12St_FiberTapSt_MCE_1_ShearNormalized_32_window0.png	signals12St_FiberConstSt_DBE_1_ShearNormalized_32_window0.png	signals12St_FiberNomSt_MCE_1_ShearNormalized_32_window0.png	4.12	32	0	1_ShearNormalized	4	TRUE	signal	correct	TRUE
107	3bc567b0-1808-11e8-b122-44a84224eb5b	1	1	topics5_12St_FiberConstSt_MCE_1_ShearNormalized_12_window2.png	topics5_12St_FiberNomSt_MCE_1_ShearNormalized_12_window2.png	topics5_12St_FiberTapSt_DBE_1_ShearNormalized_12_window2.png	2.54	12	2	1_ShearNormalized	4	FALSE	topic	correct	TRUE
108	3bc567b0-1808-11e8-b122-44a84224eb5b	1	1	topics5_12St_FiberConstSt_MCE_1_ShearNormalized_09_window2.png	topics5_12St_FiberNomSt_MCE_1_ShearNormalized_09_window2.png	topics5_12St_FiberTapSt_DBE_1_ShearNormalized_09_window2.png	3.08	9	2	1_ShearNormalized	4	FALSE	topic	correct	TRUE
109	3bc567b0-1808-11e8-b122-44a84224eb5b	2	2	topics5_12St_FiberTapSt_Serv_1_ShearNormalized_19_window0.png	topics5_12St_FiberNomSt_DBE_1_ShearNormalized_19_window0.png	topics5_12St_FiberConstSt_Serv_1_ShearNormalized_19_window0.png	2.8	19	0	1_ShearNormalized	2	FALSE	topic	correct	TRUE
110	3bc567b0-1808-11e8-b122-44a84224eb5b	2	2	signals12St_BHinge_MCE_1_ShearNormalized_17_window1.png	signals12St_FiberTapSt_MCE_1_ShearNormalized_17_window1.png	signals12St_BHinge_DBE_1_ShearNormalized_17_window1.png	3.19	17	1	1_ShearNormalized	1	TRUE	signal	correct	TRUE
111	3bc567b0-1808-11e8-b122-44a84224eb5b	2	2	signals12St_FiberConstSt_MCE_1_ShearNormalized_10_window0.png	signals12St_FiberTapSt_DBE_1_ShearNormalized_10_window0.png	signals12St_FiberNomSt_MCE_1_ShearNormalized_10_window0.png	1.65	10	0	1_ShearNormalized	4	TRUE	signal	correct	TRUE
112	3bc567b0-1808-11e8-b122-44a84224eb5b	1	1	topics5_12St_BHinge_DBE_1_ShearNormalized_08_window0.png	topics5_12St_BHinge_MCE_1_ShearNormalized_08_window0.png	topics5_12St_FiberConstSt_DBE_1_ShearNormalized_08_window0.png	2.78	8	0	1_ShearNormalized	1	FALSE	topic	correct	TRUE
113	3bc567b0-1808-11e8-b122-44a84224eb5b	2	2	signals12St_BHinge_DBE_1_ShearNormalized_02_window0.png	signals12St_FiberTapSt_DBE_1_ShearNormalized_02_window0.png	signals12St_BHinge_DBE_1_ShearNormalized_02_window0.png	2.17	2	0	1_ShearNormalized	0	TRUE	signal	correct	TRUE
114	3bc567b0-1808-11e8-b122-44a84224eb5b	2	2	signals12St_BHinge_DBE_1_ShearNormalized_08_window0.png	signals12St_FiberConstSt_DBE_1_ShearNormalized_08_window0.png	signals12St_BHinge_MCE_1_ShearNormalized_08_window0.png	3.39	8	0	1_ShearNormalized	1	TRUE	signal	correct	TRUE
115	3bc567b0-1808-11e8-b122-44a84224eb5b	2	2	topics5_12St_BHinge_MCE_1_ShearNormalized_02_window0.png	topics5_12St_FiberTapSt_MCE_1_ShearNormalized_02_window0.png	topics5_12St_BHinge_Serv_1_ShearNormalized_02_window0.png	3.07	2	0	1_ShearNormalized	3	FALSE	topic	correct	TRUE
116	3bc567b0-1808-11e8-b122-44a84224eb5b	2	2	signals12St_FiberConstSt_MCE_1_ShearNormalized_12_window2.png	signals12St_FiberTapSt_DBE_1_ShearNormalized_12_window2.png	signals12St_FiberNomSt_MCE_1_ShearNormalized_12_window2.png	2.16	12	2	1_ShearNormalized	4	TRUE	signal	correct	TRUE
117	3bc567b0-1808-11e8-b122-44a84224eb5b	1	2	signals12St_BHinge_MCE_1_ShearNormalized_02_window0.png	signals12St_BHinge_Serv_1_ShearNormalized_02_window0.png	signals12St_FiberTapSt_MCE_1_ShearNormalized_02_window0.png	2.18	2	0	1_ShearNormalized	3	TRUE	signal	incorrect	FALSE
118	3bc567b0-1808-11e8-b122-44a84224eb5b	1	1	signals12St_FiberTapSt_Serv_1_ShearNormalized_19_window0.png	signals12St_FiberConstSt_Serv_1_ShearNormalized_19_window0.png	signals12St_FiberNomSt_DBE_1_ShearNormalized_19_window0.png	2.47	19	0	1_ShearNormalized	2	TRUE	signal	correct	TRUE
119	3bc567b0-1808-11e8-b122-44a84224eb5b	2	2	topics5_12St_FiberConstSt_Serv_1_ShearNormalized_12_window1.png	topics5_12St_FiberNomSt_MCE_1_ShearNormalized_12_window1.png	topics5_12St_FiberTapSt_Serv_1_ShearNormalized_12_window1.png	2	12	1	1_ShearNormalized	2	FALSE	topic	correct	TRUE
120	3bc567b0-1808-11e8-b122-44a84224eb5b	1	2	signals12St_BHinge_MCE_1_ShearNormalized_29_window2.png	signals12St_BHinge_Serv_1_ShearNormalized_29_window2.png	signals12St_FiberTapSt_MCE_1_ShearNormalized_29_window2.png	2.06	29	2	1_ShearNormalized	3	TRUE	signal	incorrect	FALSE
121	3bc567b0-1808-11e8-b122-44a84224eb5b	1	1	topics5_12St_FiberTapSt_MCE_1_ShearNormalized_32_window0.png	topics5_12St_FiberNomSt_MCE_1_ShearNormalized_32_window0.png	topics5_12St_FiberConstSt_DBE_1_ShearNormalized_32_window0.png	2.86	32	0	1_ShearNormalized	4	FALSE	topic	correct	TRUE
122	3bc567b0-1808-11e8-b122-44a84224eb5b	1	1	topics5_12St_FiberTapSt_MCE_1_ShearNormalized_03_window2.png	topics5_12St_FiberNomSt_MCE_1_ShearNormalized_03_window2.png	topics5_12St_FiberConstSt_DBE_1_ShearNormalized_03_window2.png	2.41	3	2	1_ShearNormalized	4	FALSE	topic	correct	TRUE
123	3bc567b0-1808-11e8-b122-44a84224eb5b	2	1	signals12St_FiberNomSt_MCE_1_ShearNormalized_27_window0.png	signals12St_FiberConstSt_DBE_1_ShearNormalized_27_window0.png	signals12St_FiberTapSt_MCE_1_ShearNormalized_27_window0.png	2.22	27	0	1_ShearNormalized	4	TRUE	signal	incorrect	FALSE
124	3bc567b0-1808-11e8-b122-44a84224eb5b	1	1	topics5_12St_FiberConstSt_MCE_1_ShearNormalized_10_window0.png	topics5_12St_FiberNomSt_MCE_1_ShearNormalized_10_window0.png	topics5_12St_FiberTapSt_DBE_1_ShearNormalized_10_window0.png	6.98	10	0	1_ShearNormalized	4	FALSE	topic	correct	TRUE
125	3bc567b0-1808-11e8-b122-44a84224eb5b	1	2	topics5_12St_FiberNomSt_MCE_1_ShearNormalized_27_window0.png	topics5_12St_FiberTapSt_MCE_1_ShearNormalized_27_window0.png	topics5_12St_FiberConstSt_DBE_1_ShearNormalized_27_window0.png	2.7	27	0	1_ShearNormalized	4	FALSE	topic	incorrect	FALSE
126	3bc567b0-1808-11e8-b122-44a84224eb5b	2	2	signals12St_BHinge_MCE_1_ShearNormalized_09_window1.png	signals12St_FiberTapSt_MCE_1_ShearNormalized_09_window1.png	signals12St_BHinge_MCE_1_ShearNormalized_09_window1.png	1.81	9	1	1_ShearNormalized	0	TRUE	signal	correct	TRUE
127	3bc567b0-1808-11e8-b122-44a84224eb5b	1	1	topics5_12St_BHinge_DBE_1_ShearNormalized_02_window0.png	topics5_12St_BHinge_DBE_1_ShearNormalized_02_window0.png	topics5_12St_FiberTapSt_DBE_1_ShearNormalized_02_window0.png	1.68	2	0	1_ShearNormalized	0	FALSE	topic	correct	TRUE
128	3bc567b0-1808-11e8-b122-44a84224eb5b	2	2	topics5_12St_FiberConstSt_Serv_1_ShearNormalized_34_window0.png	topics5_12St_FiberTapSt_DBE_1_ShearNormalized_34_window0.png	topics5_12St_FiberNomSt_Serv_1_ShearNormalized_34_window0.png	2.08	34	0	1_ShearNormalized	2	FALSE	topic	correct	TRUE
129	3bc567b0-1808-11e8-b122-44a84224eb5b	1	1	signals12St_FiberConstSt_Serv_1_ShearNormalized_34_window0.png	signals12St_FiberNomSt_Serv_1_ShearNormalized_34_window0.png	signals12St_FiberTapSt_DBE_1_ShearNormalized_34_window0.png	2.74	34	0	1_ShearNormalized	2	TRUE	signal	correct	TRUE
130	3bc567b0-1808-11e8-b122-44a84224eb5b	1	1	topics5_12St_BHinge_MCE_1_ShearNormalized_09_window1.png	topics5_12St_BHinge_MCE_1_ShearNormalized_09_window1.png	topics5_12St_FiberTapSt_MCE_1_ShearNormalized_09_window1.png	2.46	9	1	1_ShearNormalized	0	FALSE	topic	correct	TRUE
131	3bc567b0-1808-11e8-b122-44a84224eb5b	2	1	topics5_12St_BHinge_MCE_1_ShearNormalized_29_window2.png	topics5_12St_FiberTapSt_MCE_1_ShearNormalized_29_window2.png	topics5_12St_BHinge_Serv_1_ShearNormalized_29_window2.png	3.58	29	2	1_ShearNormalized	3	FALSE	topic	incorrect	FALSE
132	3bc567b0-1808-11e8-b122-44a84224eb5b	2	2	signals12St_FiberNomSt_MCE_1_ShearNormalized_49_window2.png	signals12St_FiberTapSt_DBE_1_ShearNormalized_49_window2.png	signals12St_FiberConstSt_MCE_1_ShearNormalized_49_window2.png	4.22	49	2	1_ShearNormalized	4	TRUE	signal	correct	TRUE
133	3bc567b0-1808-11e8-b122-44a84224eb5b	1	1	signals12St_FiberConstSt_Serv_1_ShearNormalized_12_window1.png	signals12St_FiberTapSt_Serv_1_ShearNormalized_12_window1.png	signals12St_FiberNomSt_MCE_1_ShearNormalized_12_window1.png	2.15	12	1	1_ShearNormalized	2	TRUE	signal	correct	TRUE
134	3bc567b0-1808-11e8-b122-44a84224eb5b	2	1	signals12St_BHinge_MCE_1_ShearNormalized_28_window2.png	signals12St_FiberNomSt_MCE_1_ShearNormalized_28_window2.png	signals12St_BHinge_DBE_1_ShearNormalized_28_window2.png	3.4	28	2	1_ShearNormalized	1	TRUE	signal	incorrect	FALSE
135	3bc567b0-1808-11e8-b122-44a84224eb5b	1	1	topics5_12St_BHinge_MCE_1_ShearNormalized_17_window1.png	topics5_12St_BHinge_DBE_1_ShearNormalized_17_window1.png	topics5_12St_FiberTapSt_MCE_1_ShearNormalized_17_window1.png	2.35	17	1	1_ShearNormalized	1	FALSE	topic	correct	TRUE
136	3bc567b0-1808-11e8-b122-44a84224eb5b	2	2	signals12St_FiberConstSt_MCE_1_ShearNormalized_09_window2.png	signals12St_FiberTapSt_DBE_1_ShearNormalized_09_window2.png	signals12St_FiberNomSt_MCE_1_ShearNormalized_09_window2.png	2.13	9	2	1_ShearNormalized	4	TRUE	signal	correct	TRUE
137	49eaa10a-1bcf-11e8-b122-44a84224eb5b	1	2	signals12St_BHinge_Serv_1_ShearNormalized_24_window1.png	signals12St_BHinge_MCE_1_ShearNormalized_24_window1.png	signals12St_FiberTapSt_Serv_1_ShearNormalized_24_window1.png	6.38	24	1	1_ShearNormalized	3	TRUE	signal	incorrect	FALSE
138	49eaa10a-1bcf-11e8-b122-44a84224eb5b	2	2	topics5_12St_FiberTapSt_Serv_1_ShearNormalized_05_window1.png	topics5_12St_FiberConstSt_DBE_1_ShearNormalized_05_window1.png	topics5_12St_FiberNomSt_Serv_1_ShearNormalized_05_window1.png	3.23	5	1	1_ShearNormalized	2	FALSE	topic	correct	TRUE
139	49eaa10a-1bcf-11e8-b122-44a84224eb5b	2	2	topics5_12St_FiberNomSt_Serv_1_ShearNormalized_28_window1.png	topics5_12St_FiberConstSt_DBE_1_ShearNormalized_28_window1.png	topics5_12St_FiberTapSt_Serv_1_ShearNormalized_28_window1.png	2.16	28	1	1_ShearNormalized	2	FALSE	topic	correct	TRUE
140	49eaa10a-1bcf-11e8-b122-44a84224eb5b	2	2	topics5_12St_FiberNomSt_Serv_1_ShearNormalized_06_window0.png	topics5_12St_FiberConstSt_MCE_1_ShearNormalized_06_window0.png	topics5_12St_FiberTapSt_Serv_1_ShearNormalized_06_window0.png	2.69	6	0	1_ShearNormalized	2	FALSE	topic	correct	TRUE
141	49eaa10a-1bcf-11e8-b122-44a84224eb5b	2	2	topics5_12St_BHinge_Serv_1_ShearNormalized_24_window1.png	topics5_12St_FiberTapSt_Serv_1_ShearNormalized_24_window1.png	topics5_12St_BHinge_MCE_1_ShearNormalized_24_window1.png	5.31	24	1	1_ShearNormalized	3	FALSE	topic	correct	TRUE
142	49eaa10a-1bcf-11e8-b122-44a84224eb5b	1	1	topics5_12St_BHinge_MCE_1_ShearNormalized_37_window1.png	topics5_12St_BHinge_MCE_1_ShearNormalized_37_window1.png	topics5_12St_FiberTapSt_MCE_1_ShearNormalized_37_window1.png	2.54	37	1	1_ShearNormalized	0	FALSE	topic	correct	TRUE
143	49eaa10a-1bcf-11e8-b122-44a84224eb5b	1	1	signals12St_BHinge_DBE_1_ShearNormalized_50_window0.png	signals12St_BHinge_Serv_1_ShearNormalized_50_window0.png	signals12St_FiberConstSt_DBE_1_ShearNormalized_50_window0.png	8.94	50	0	1_ShearNormalized	3	TRUE	signal	correct	TRUE
144	49eaa10a-1bcf-11e8-b122-44a84224eb5b	2	2	signals12St_BHinge_MCE_1_ShearNormalized_46_window2.png	signals12St_FiberNomSt_MCE_1_ShearNormalized_46_window2.png	signals12St_BHinge_MCE_1_ShearNormalized_46_window2.png	3.1	46	2	1_ShearNormalized	0	TRUE	signal	correct	TRUE
145	49eaa10a-1bcf-11e8-b122-44a84224eb5b	1	1	signals12St_FiberConstSt_Serv_1_ShearNormalized_37_window2.png	signals12St_FiberTapSt_Serv_1_ShearNormalized_37_window2.png	signals12St_FiberNomSt_MCE_1_ShearNormalized_37_window2.png	2.39	37	2	1_ShearNormalized	2	TRUE	signal	correct	TRUE
146	49eaa10a-1bcf-11e8-b122-44a84224eb5b	2	2	topics5_12St_BHinge_Serv_1_ShearNormalized_18_window1.png	topics5_12St_FiberNomSt_Serv_1_ShearNormalized_18_window1.png	topics5_12St_BHinge_DBE_1_ShearNormalized_18_window1.png	3.14	18	1	1_ShearNormalized	3	FALSE	topic	correct	TRUE
147	49eaa10a-1bcf-11e8-b122-44a84224eb5b	2	2	signals12St_BHinge_MCE_1_ShearNormalized_37_window0.png	signals12St_FiberConstSt_MCE_1_ShearNormalized_37_window0.png	signals12St_BHinge_DBE_1_ShearNormalized_37_window0.png	3.22	37	0	1_ShearNormalized	1	TRUE	signal	correct	TRUE
148	49eaa10a-1bcf-11e8-b122-44a84224eb5b	1	1	signals12St_BHinge_Serv_1_ShearNormalized_18_window1.png	signals12St_BHinge_DBE_1_ShearNormalized_18_window1.png	signals12St_FiberNomSt_Serv_1_ShearNormalized_18_window1.png	9.12	18	1	1_ShearNormalized	3	TRUE	signal	correct	TRUE
149	49eaa10a-1bcf-11e8-b122-44a84224eb5b	2	2	topics5_12St_FiberTapSt_Serv_1_ShearNormalized_50_window2.png	topics5_12St_FiberConstSt_MCE_1_ShearNormalized_50_window2.png	topics5_12St_FiberNomSt_Serv_1_ShearNormalized_50_window2.png	1.86	50	2	1_ShearNormalized	2	FALSE	topic	correct	TRUE
150	49eaa10a-1bcf-11e8-b122-44a84224eb5b	1	1	topics5_12St_FiberConstSt_MCE_1_ShearNormalized_08_window2.png	topics5_12St_FiberNomSt_MCE_1_ShearNormalized_08_window2.png	topics5_12St_FiberTapSt_DBE_1_ShearNormalized_08_window2.png	4.64	8	2	1_ShearNormalized	4	FALSE	topic	correct	TRUE
151	49eaa10a-1bcf-11e8-b122-44a84224eb5b	1	1	topics5_12St_FiberConstSt_MCE_1_ShearNormalized_05_window0.png	topics5_12St_FiberTapSt_MCE_1_ShearNormalized_05_window0.png	topics5_12St_FiberNomSt_DBE_1_ShearNormalized_05_window0.png	11.03	5	0	1_ShearNormalized	4	FALSE	topic	correct	TRUE
152	49eaa10a-1bcf-11e8-b122-44a84224eb5b	1	1	signals12St_FiberNomSt_Serv_1_ShearNormalized_06_window0.png	signals12St_FiberTapSt_Serv_1_ShearNormalized_06_window0.png	signals12St_FiberConstSt_MCE_1_ShearNormalized_06_window0.png	2.59	6	0	1_ShearNormalized	2	TRUE	signal	correct	TRUE
153	49eaa10a-1bcf-11e8-b122-44a84224eb5b	1	2	signals12St_BHinge_DBE_1_ShearNormalized_40_window1.png	signals12St_BHinge_Serv_1_ShearNormalized_40_window1.png	signals12St_FiberConstSt_DBE_1_ShearNormalized_40_window1.png	4.45	40	1	1_ShearNormalized	3	TRUE	signal	incorrect	FALSE
154	49eaa10a-1bcf-11e8-b122-44a84224eb5b	1	1	topics5_12St_BHinge_MCE_1_ShearNormalized_46_window2.png	topics5_12St_BHinge_MCE_1_ShearNormalized_46_window2.png	topics5_12St_FiberNomSt_MCE_1_ShearNormalized_46_window2.png	4.08	46	2	1_ShearNormalized	0	FALSE	topic	correct	TRUE
155	49eaa10a-1bcf-11e8-b122-44a84224eb5b	1	1	topics5_12St_BHinge_MCE_1_ShearNormalized_37_window0.png	topics5_12St_BHinge_DBE_1_ShearNormalized_37_window0.png	topics5_12St_FiberConstSt_MCE_1_ShearNormalized_37_window0.png	2.9	37	0	1_ShearNormalized	1	FALSE	topic	correct	TRUE
156	49eaa10a-1bcf-11e8-b122-44a84224eb5b	2	2	signals12St_FiberNomSt_MCE_1_ShearNormalized_09_window2.png	signals12St_FiberConstSt_DBE_1_ShearNormalized_09_window2.png	signals12St_FiberTapSt_MCE_1_ShearNormalized_09_window2.png	6.18	9	2	1_ShearNormalized	4	TRUE	signal	correct	TRUE
157	49eaa10a-1bcf-11e8-b122-44a84224eb5b	2	2	signals12St_FiberConstSt_MCE_1_ShearNormalized_08_window2.png	signals12St_FiberTapSt_DBE_1_ShearNormalized_08_window2.png	signals12St_FiberNomSt_MCE_1_ShearNormalized_08_window2.png	4.17	8	2	1_ShearNormalized	4	TRUE	signal	correct	TRUE
158	49eaa10a-1bcf-11e8-b122-44a84224eb5b	2	2	signals12St_BHinge_MCE_1_ShearNormalized_37_window1.png	signals12St_FiberTapSt_MCE_1_ShearNormalized_37_window1.png	signals12St_BHinge_MCE_1_ShearNormalized_37_window1.png	5.06	37	1	1_ShearNormalized	0	TRUE	signal	correct	TRUE
159	49eaa10a-1bcf-11e8-b122-44a84224eb5b	2	2	signals12St_FiberTapSt_MCE_1_ShearNormalized_30_window0.png	signals12St_FiberConstSt_DBE_1_ShearNormalized_30_window0.png	signals12St_FiberNomSt_MCE_1_ShearNormalized_30_window0.png	6.06	30	0	1_ShearNormalized	4	TRUE	signal	correct	TRUE
160	49eaa10a-1bcf-11e8-b122-44a84224eb5b	2	2	topics5_12St_FiberNomSt_Serv_1_ShearNormalized_11_window1.png	topics5_12St_FiberTapSt_MCE_1_ShearNormalized_11_window1.png	topics5_12St_FiberConstSt_Serv_1_ShearNormalized_11_window1.png	11.76	11	1	1_ShearNormalized	2	FALSE	topic	correct	TRUE
161	49eaa10a-1bcf-11e8-b122-44a84224eb5b	1	1	signals12St_FiberNomSt_Serv_1_ShearNormalized_28_window1.png	signals12St_FiberTapSt_Serv_1_ShearNormalized_28_window1.png	signals12St_FiberConstSt_DBE_1_ShearNormalized_28_window1.png	4.35	28	1	1_ShearNormalized	2	TRUE	signal	correct	TRUE
162	49eaa10a-1bcf-11e8-b122-44a84224eb5b	1	1	topics5_12St_FiberNomSt_MCE_1_ShearNormalized_09_window2.png	topics5_12St_FiberTapSt_MCE_1_ShearNormalized_09_window2.png	topics5_12St_FiberConstSt_DBE_1_ShearNormalized_09_window2.png	7.3	9	2	1_ShearNormalized	4	FALSE	topic	correct	TRUE
163	49eaa10a-1bcf-11e8-b122-44a84224eb5b	2	2	topics5_12St_BHinge_DBE_1_ShearNormalized_50_window0.png	topics5_12St_FiberConstSt_DBE_1_ShearNormalized_50_window0.png	topics5_12St_BHinge_Serv_1_ShearNormalized_50_window0.png	11.51	50	0	1_ShearNormalized	3	FALSE	topic	correct	TRUE
164	49eaa10a-1bcf-11e8-b122-44a84224eb5b	2	2	signals12St_FiberConstSt_MCE_1_ShearNormalized_05_window0.png	signals12St_FiberNomSt_DBE_1_ShearNormalized_05_window0.png	signals12St_FiberTapSt_MCE_1_ShearNormalized_05_window0.png	8.2	5	0	1_ShearNormalized	4	TRUE	signal	correct	TRUE
165	49eaa10a-1bcf-11e8-b122-44a84224eb5b	1	1	signals12St_FiberNomSt_Serv_1_ShearNormalized_11_window1.png	signals12St_FiberConstSt_Serv_1_ShearNormalized_11_window1.png	signals12St_FiberTapSt_MCE_1_ShearNormalized_11_window1.png	6.49	11	1	1_ShearNormalized	2	TRUE	signal	correct	TRUE
166	49eaa10a-1bcf-11e8-b122-44a84224eb5b	1	1	signals12St_FiberTapSt_Serv_1_ShearNormalized_05_window1.png	signals12St_FiberNomSt_Serv_1_ShearNormalized_05_window1.png	signals12St_FiberConstSt_DBE_1_ShearNormalized_05_window1.png	5.39	5	1	1_ShearNormalized	2	TRUE	signal	correct	TRUE
167	49eaa10a-1bcf-11e8-b122-44a84224eb5b	2	2	topics5_12St_FiberConstSt_Serv_1_ShearNormalized_37_window2.png	topics5_12St_FiberNomSt_MCE_1_ShearNormalized_37_window2.png	topics5_12St_FiberTapSt_Serv_1_ShearNormalized_37_window2.png	3.13	37	2	1_ShearNormalized	2	FALSE	topic	correct	TRUE
168	49eaa10a-1bcf-11e8-b122-44a84224eb5b	2	2	topics5_12St_BHinge_DBE_1_ShearNormalized_40_window1.png	topics5_12St_FiberConstSt_DBE_1_ShearNormalized_40_window1.png	topics5_12St_BHinge_Serv_1_ShearNormalized_40_window1.png	3.52	40	1	1_ShearNormalized	3	FALSE	topic	correct	TRUE
169	49eaa10a-1bcf-11e8-b122-44a84224eb5b	1	1	topics5_12St_FiberTapSt_MCE_1_ShearNormalized_30_window0.png	topics5_12St_FiberNomSt_MCE_1_ShearNormalized_30_window0.png	topics5_12St_FiberConstSt_DBE_1_ShearNormalized_30_window0.png	9.7	30	0	1_ShearNormalized	4	FALSE	topic	correct	TRUE
170	49eaa10a-1bcf-11e8-b122-44a84224eb5b	1	1	signals12St_FiberTapSt_Serv_1_ShearNormalized_50_window2.png	signals12St_FiberNomSt_Serv_1_ShearNormalized_50_window2.png	signals12St_FiberConstSt_MCE_1_ShearNormalized_50_window2.png	3.46	50	2	1_ShearNormalized	2	TRUE	signal	correct	TRUE
171	50d18982-1ca8-11e8-a74b-44a84224eb5b	1	1	signals12St_FiberConstSt_Serv_1_ShearNormalized_17_window0.png	signals12St_FiberNomSt_Serv_1_ShearNormalized_17_window0.png	signals12St_FiberTapSt_MCE_1_ShearNormalized_17_window0.png	3.44	17	0	1_ShearNormalized	2	TRUE	signal	correct	TRUE
172	50d18982-1ca8-11e8-a74b-44a84224eb5b	2	1	topics5_12St_BHinge_DBE_1_ShearNormalized_49_window2.png	topics5_12St_FiberConstSt_DBE_1_ShearNormalized_49_window2.png	topics5_12St_BHinge_Serv_1_ShearNormalized_49_window2.png	8.92	49	2	1_ShearNormalized	3	FALSE	topic	incorrect	FALSE
173	50d18982-1ca8-11e8-a74b-44a84224eb5b	2	2	topics5_12St_BHinge_Serv_1_ShearNormalized_03_window2.png	topics5_12St_FiberNomSt_Serv_1_ShearNormalized_03_window2.png	topics5_12St_BHinge_MCE_1_ShearNormalized_03_window2.png	5.54	3	2	1_ShearNormalized	3	FALSE	topic	correct	TRUE
174	50d18982-1ca8-11e8-a74b-44a84224eb5b	2	2	signals12St_FiberConstSt_MCE_1_ShearNormalized_38_window2.png	signals12St_FiberTapSt_DBE_1_ShearNormalized_38_window2.png	signals12St_FiberNomSt_MCE_1_ShearNormalized_38_window2.png	3.75	38	2	1_ShearNormalized	4	TRUE	signal	correct	TRUE
175	50d18982-1ca8-11e8-a74b-44a84224eb5b	1	1	topics5_12St_BHinge_DBE_1_ShearNormalized_23_window1.png	topics5_12St_BHinge_MCE_1_ShearNormalized_23_window1.png	topics5_12St_FiberConstSt_DBE_1_ShearNormalized_23_window1.png	3.69	23	1	1_ShearNormalized	1	FALSE	topic	correct	TRUE
176	50d18982-1ca8-11e8-a74b-44a84224eb5b	1	1	topics5_12St_FiberConstSt_MCE_1_ShearNormalized_41_window0.png	topics5_12St_FiberNomSt_MCE_1_ShearNormalized_41_window0.png	topics5_12St_FiberTapSt_DBE_1_ShearNormalized_41_window0.png	3.99	41	0	1_ShearNormalized	4	FALSE	topic	correct	TRUE
177	50d18982-1ca8-11e8-a74b-44a84224eb5b	1	2	signals12St_BHinge_DBE_1_ShearNormalized_49_window2.png	signals12St_BHinge_Serv_1_ShearNormalized_49_window2.png	signals12St_FiberConstSt_DBE_1_ShearNormalized_49_window2.png	5.55	49	2	1_ShearNormalized	3	TRUE	signal	incorrect	FALSE
178	50d18982-1ca8-11e8-a74b-44a84224eb5b	2	2	signals12St_BHinge_DBE_1_ShearNormalized_33_window0.png	signals12St_FiberNomSt_DBE_1_ShearNormalized_33_window0.png	signals12St_BHinge_DBE_1_ShearNormalized_33_window0.png	2.71	33	0	1_ShearNormalized	0	TRUE	signal	correct	TRUE
179	50d18982-1ca8-11e8-a74b-44a84224eb5b	2	1	topics5_12St_BHinge_Serv_1_ShearNormalized_45_window1.png	topics5_12St_FiberTapSt_Serv_1_ShearNormalized_45_window1.png	topics5_12St_BHinge_MCE_1_ShearNormalized_45_window1.png	8.76	45	1	1_ShearNormalized	3	FALSE	topic	incorrect	FALSE
180	50d18982-1ca8-11e8-a74b-44a84224eb5b	2	2	signals12St_FiberConstSt_MCE_1_ShearNormalized_41_window0.png	signals12St_FiberTapSt_DBE_1_ShearNormalized_41_window0.png	signals12St_FiberNomSt_MCE_1_ShearNormalized_41_window0.png	3.16	41	0	1_ShearNormalized	4	TRUE	signal	correct	TRUE
181	50d18982-1ca8-11e8-a74b-44a84224eb5b	1	1	topics5_12St_BHinge_DBE_1_ShearNormalized_23_window0.png	topics5_12St_BHinge_DBE_1_ShearNormalized_23_window0.png	topics5_12St_FiberNomSt_DBE_1_ShearNormalized_23_window0.png	2.67	23	0	1_ShearNormalized	0	FALSE	topic	correct	TRUE
182	50d18982-1ca8-11e8-a74b-44a84224eb5b	1	1	topics5_12St_FiberConstSt_MCE_1_ShearNormalized_38_window2.png	topics5_12St_FiberNomSt_MCE_1_ShearNormalized_38_window2.png	topics5_12St_FiberTapSt_DBE_1_ShearNormalized_38_window2.png	2.9	38	2	1_ShearNormalized	4	FALSE	topic	correct	TRUE
183	50d18982-1ca8-11e8-a74b-44a84224eb5b	2	2	topics5_12St_BHinge_DBE_1_ShearNormalized_26_window1.png	topics5_12St_FiberNomSt_DBE_1_ShearNormalized_26_window1.png	topics5_12St_BHinge_Serv_1_ShearNormalized_26_window1.png	3.49	26	1	1_ShearNormalized	3	FALSE	topic	correct	TRUE
184	50d18982-1ca8-11e8-a74b-44a84224eb5b	1	2	signals12St_BHinge_Serv_1_ShearNormalized_45_window1.png	signals12St_BHinge_MCE_1_ShearNormalized_45_window1.png	signals12St_FiberTapSt_Serv_1_ShearNormalized_45_window1.png	4.09	45	1	1_ShearNormalized	3	TRUE	signal	incorrect	FALSE
185	50d18982-1ca8-11e8-a74b-44a84224eb5b	2	2	signals12St_BHinge_DBE_1_ShearNormalized_23_window0.png	signals12St_FiberNomSt_DBE_1_ShearNormalized_23_window0.png	signals12St_BHinge_DBE_1_ShearNormalized_23_window0.png	3.56	23	0	1_ShearNormalized	0	TRUE	signal	correct	TRUE
186	50d18982-1ca8-11e8-a74b-44a84224eb5b	1	1	signals12St_FiberNomSt_Serv_1_ShearNormalized_38_window1.png	signals12St_FiberTapSt_Serv_1_ShearNormalized_38_window1.png	signals12St_FiberConstSt_MCE_1_ShearNormalized_38_window1.png	2.26	38	1	1_ShearNormalized	2	TRUE	signal	correct	TRUE
187	50d18982-1ca8-11e8-a74b-44a84224eb5b	2	2	topics5_12St_BHinge_DBE_1_ShearNormalized_22_window0.png	topics5_12St_FiberNomSt_DBE_1_ShearNormalized_22_window0.png	topics5_12St_BHinge_Serv_1_ShearNormalized_22_window0.png	3.3	22	0	1_ShearNormalized	3	FALSE	topic	correct	TRUE
188	50d18982-1ca8-11e8-a74b-44a84224eb5b	1	2	signals12St_BHinge_Serv_1_ShearNormalized_03_window2.png	signals12St_BHinge_MCE_1_ShearNormalized_03_window2.png	signals12St_FiberNomSt_Serv_1_ShearNormalized_03_window2.png	3.14	3	2	1_ShearNormalized	3	TRUE	signal	incorrect	FALSE
189	50d18982-1ca8-11e8-a74b-44a84224eb5b	1	1	signals12St_BHinge_DBE_1_ShearNormalized_22_window0.png	signals12St_BHinge_Serv_1_ShearNormalized_22_window0.png	signals12St_FiberNomSt_DBE_1_ShearNormalized_22_window0.png	2.68	22	0	1_ShearNormalized	3	TRUE	signal	correct	TRUE
190	50d18982-1ca8-11e8-a74b-44a84224eb5b	1	1	signals12St_FiberConstSt_Serv_1_ShearNormalized_21_window0.png	signals12St_FiberTapSt_Serv_1_ShearNormalized_21_window0.png	signals12St_FiberNomSt_DBE_1_ShearNormalized_21_window0.png	2.22	21	0	1_ShearNormalized	2	TRUE	signal	correct	TRUE
191	50d18982-1ca8-11e8-a74b-44a84224eb5b	1	2	signals12St_BHinge_MCE_1_ShearNormalized_25_window0.png	signals12St_BHinge_Serv_1_ShearNormalized_25_window0.png	signals12St_FiberNomSt_MCE_1_ShearNormalized_25_window0.png	2.42	25	0	1_ShearNormalized	3	TRUE	signal	incorrect	FALSE
192	50d18982-1ca8-11e8-a74b-44a84224eb5b	2	2	topics5_12St_FiberNomSt_Serv_1_ShearNormalized_38_window1.png	topics5_12St_FiberConstSt_MCE_1_ShearNormalized_38_window1.png	topics5_12St_FiberTapSt_Serv_1_ShearNormalized_38_window1.png	2.25	38	1	1_ShearNormalized	2	FALSE	topic	correct	TRUE
193	50d18982-1ca8-11e8-a74b-44a84224eb5b	1	1	topics5_12St_FiberNomSt_MCE_1_ShearNormalized_17_window1.png	topics5_12St_FiberConstSt_MCE_1_ShearNormalized_17_window1.png	topics5_12St_FiberTapSt_DBE_1_ShearNormalized_17_window1.png	4.64	17	1	1_ShearNormalized	4	FALSE	topic	correct	TRUE
194	50d18982-1ca8-11e8-a74b-44a84224eb5b	2	1	signals12St_BHinge_DBE_1_ShearNormalized_23_window1.png	signals12St_FiberConstSt_DBE_1_ShearNormalized_23_window1.png	signals12St_BHinge_MCE_1_ShearNormalized_23_window1.png	4.69	23	1	1_ShearNormalized	1	TRUE	signal	incorrect	FALSE
195	50d18982-1ca8-11e8-a74b-44a84224eb5b	2	2	signals12St_FiberNomSt_MCE_1_ShearNormalized_17_window1.png	signals12St_FiberTapSt_DBE_1_ShearNormalized_17_window1.png	signals12St_FiberConstSt_MCE_1_ShearNormalized_17_window1.png	4.41	17	1	1_ShearNormalized	4	TRUE	signal	correct	TRUE
196	50d18982-1ca8-11e8-a74b-44a84224eb5b	2	2	topics5_12St_FiberConstSt_Serv_1_ShearNormalized_17_window0.png	topics5_12St_FiberTapSt_MCE_1_ShearNormalized_17_window0.png	topics5_12St_FiberNomSt_Serv_1_ShearNormalized_17_window0.png	3.85	17	0	1_ShearNormalized	2	FALSE	topic	correct	TRUE
197	50d18982-1ca8-11e8-a74b-44a84224eb5b	2	2	topics5_12St_FiberConstSt_Serv_1_ShearNormalized_21_window0.png	topics5_12St_FiberNomSt_DBE_1_ShearNormalized_21_window0.png	topics5_12St_FiberTapSt_Serv_1_ShearNormalized_21_window0.png	4.46	21	0	1_ShearNormalized	2	FALSE	topic	correct	TRUE
198	50d18982-1ca8-11e8-a74b-44a84224eb5b	1	1	signals12St_BHinge_DBE_1_ShearNormalized_26_window1.png	signals12St_BHinge_Serv_1_ShearNormalized_26_window1.png	signals12St_FiberNomSt_DBE_1_ShearNormalized_26_window1.png	2.57	26	1	1_ShearNormalized	3	TRUE	signal	correct	TRUE
199	50d18982-1ca8-11e8-a74b-44a84224eb5b	2	2	signals12St_FiberNomSt_MCE_1_ShearNormalized_04_window2.png	signals12St_FiberConstSt_DBE_1_ShearNormalized_04_window2.png	signals12St_FiberTapSt_MCE_1_ShearNormalized_04_window2.png	2.37	4	2	1_ShearNormalized	4	TRUE	signal	correct	TRUE
200	50d18982-1ca8-11e8-a74b-44a84224eb5b	2	2	signals12St_FiberConstSt_MCE_1_ShearNormalized_28_window0.png	signals12St_FiberTapSt_DBE_1_ShearNormalized_28_window0.png	signals12St_FiberNomSt_MCE_1_ShearNormalized_28_window0.png	2.57	28	0	1_ShearNormalized	4	TRUE	signal	correct	TRUE
201	50d18982-1ca8-11e8-a74b-44a84224eb5b	1	1	topics5_12St_FiberConstSt_MCE_1_ShearNormalized_28_window0.png	topics5_12St_FiberNomSt_MCE_1_ShearNormalized_28_window0.png	topics5_12St_FiberTapSt_DBE_1_ShearNormalized_28_window0.png	6.7	28	0	1_ShearNormalized	4	FALSE	topic	correct	TRUE
202	50d18982-1ca8-11e8-a74b-44a84224eb5b	1	1	topics5_12St_FiberNomSt_MCE_1_ShearNormalized_04_window2.png	topics5_12St_FiberTapSt_MCE_1_ShearNormalized_04_window2.png	topics5_12St_FiberConstSt_DBE_1_ShearNormalized_04_window2.png	3.81	4	2	1_ShearNormalized	4	FALSE	topic	correct	TRUE
203	50d18982-1ca8-11e8-a74b-44a84224eb5b	2	2	topics5_12St_BHinge_MCE_1_ShearNormalized_25_window0.png	topics5_12St_FiberNomSt_MCE_1_ShearNormalized_25_window0.png	topics5_12St_BHinge_Serv_1_ShearNormalized_25_window0.png	4.01	25	0	1_ShearNormalized	3	FALSE	topic	correct	TRUE
204	50d18982-1ca8-11e8-a74b-44a84224eb5b	1	1	topics5_12St_BHinge_DBE_1_ShearNormalized_33_window0.png	topics5_12St_BHinge_DBE_1_ShearNormalized_33_window0.png	topics5_12St_FiberNomSt_DBE_1_ShearNormalized_33_window0.png	2.83	33	0	1_ShearNormalized	0	FALSE	topic	correct	TRUE
205	523b21fa-16b0-11e8-b122-44a84224eb5b	2	2	topics5_12St_FiberConstSt_Serv_1_ShearNormalized_01_window2.png	topics5_12St_FiberTapSt_DBE_1_ShearNormalized_01_window2.png	topics5_12St_FiberNomSt_Serv_1_ShearNormalized_01_window2.png	1.91	1	2	1_ShearNormalized	2	FALSE	topic	correct	TRUE
206	523b21fa-16b0-11e8-b122-44a84224eb5b	1	1	signals12St_FiberConstSt_Serv_1_ShearNormalized_01_window2.png	signals12St_FiberNomSt_Serv_1_ShearNormalized_01_window2.png	signals12St_FiberTapSt_DBE_1_ShearNormalized_01_window2.png	2.4	1	2	1_ShearNormalized	2	TRUE	signal	correct	TRUE
207	523b21fa-16b0-11e8-b122-44a84224eb5b	2	2	topics5_12St_BHinge_DBE_1_ShearNormalized_40_window0.png	topics5_12St_FiberTapSt_DBE_1_ShearNormalized_40_window0.png	topics5_12St_BHinge_Serv_1_ShearNormalized_40_window0.png	1.8	40	0	1_ShearNormalized	3	FALSE	topic	correct	TRUE
208	523b21fa-16b0-11e8-b122-44a84224eb5b	1	1	signals12St_FiberNomSt_Serv_1_ShearNormalized_14_window1.png	signals12St_FiberTapSt_Serv_1_ShearNormalized_14_window1.png	signals12St_FiberConstSt_DBE_1_ShearNormalized_14_window1.png	1.81	14	1	1_ShearNormalized	2	TRUE	signal	correct	TRUE
209	523b21fa-16b0-11e8-b122-44a84224eb5b	1	1	topics5_12St_BHinge_MCE_1_ShearNormalized_25_window1.png	topics5_12St_BHinge_MCE_1_ShearNormalized_25_window1.png	topics5_12St_FiberNomSt_MCE_1_ShearNormalized_25_window1.png	1.08	25	1	1_ShearNormalized	0	FALSE	topic	correct	TRUE
210	523b21fa-16b0-11e8-b122-44a84224eb5b	1	1	topics5_12St_BHinge_DBE_1_ShearNormalized_08_window0.png	topics5_12St_BHinge_MCE_1_ShearNormalized_08_window0.png	topics5_12St_FiberTapSt_DBE_1_ShearNormalized_08_window0.png	1.35	8	0	1_ShearNormalized	1	FALSE	topic	correct	TRUE
211	523b21fa-16b0-11e8-b122-44a84224eb5b	1	1	topics5_12St_FiberTapSt_MCE_1_ShearNormalized_46_window1.png	topics5_12St_FiberNomSt_MCE_1_ShearNormalized_46_window1.png	topics5_12St_FiberConstSt_DBE_1_ShearNormalized_46_window1.png	1.16	46	1	1_ShearNormalized	4	FALSE	topic	correct	TRUE
212	523b21fa-16b0-11e8-b122-44a84224eb5b	2	2	topics5_12St_BHinge_MCE_1_ShearNormalized_01_window2.png	topics5_12St_FiberConstSt_MCE_1_ShearNormalized_01_window2.png	topics5_12St_BHinge_Serv_1_ShearNormalized_01_window2.png	2.94	1	2	1_ShearNormalized	3	FALSE	topic	correct	TRUE
213	523b21fa-16b0-11e8-b122-44a84224eb5b	1	1	topics5_12St_FiberNomSt_MCE_1_ShearNormalized_38_window2.png	topics5_12St_FiberTapSt_MCE_1_ShearNormalized_38_window2.png	topics5_12St_FiberConstSt_DBE_1_ShearNormalized_38_window2.png	1.12	38	2	1_ShearNormalized	4	FALSE	topic	correct	TRUE
214	523b21fa-16b0-11e8-b122-44a84224eb5b	1	1	topics5_12St_BHinge_MCE_1_ShearNormalized_34_window1.png	topics5_12St_BHinge_DBE_1_ShearNormalized_34_window1.png	topics5_12St_FiberConstSt_MCE_1_ShearNormalized_34_window1.png	1.09	34	1	1_ShearNormalized	1	FALSE	topic	correct	TRUE
215	523b21fa-16b0-11e8-b122-44a84224eb5b	1	1	topics5_12St_BHinge_MCE_1_ShearNormalized_32_window2.png	topics5_12St_BHinge_DBE_1_ShearNormalized_32_window2.png	topics5_12St_FiberTapSt_MCE_1_ShearNormalized_32_window2.png	2.1	32	2	1_ShearNormalized	1	FALSE	topic	correct	TRUE
216	523b21fa-16b0-11e8-b122-44a84224eb5b	2	2	signals12St_BHinge_MCE_1_ShearNormalized_32_window2.png	signals12St_FiberTapSt_MCE_1_ShearNormalized_32_window2.png	signals12St_BHinge_DBE_1_ShearNormalized_32_window2.png	1.1	32	2	1_ShearNormalized	1	TRUE	signal	correct	TRUE
217	523b21fa-16b0-11e8-b122-44a84224eb5b	2	2	signals12St_FiberNomSt_MCE_1_ShearNormalized_38_window2.png	signals12St_FiberConstSt_DBE_1_ShearNormalized_38_window2.png	signals12St_FiberTapSt_MCE_1_ShearNormalized_38_window2.png	1.25	38	2	1_ShearNormalized	4	TRUE	signal	correct	TRUE
218	523b21fa-16b0-11e8-b122-44a84224eb5b	1	1	signals12St_FiberTapSt_Serv_1_ShearNormalized_43_window2.png	signals12St_FiberNomSt_Serv_1_ShearNormalized_43_window2.png	signals12St_FiberConstSt_MCE_1_ShearNormalized_43_window2.png	1.6	43	2	1_ShearNormalized	2	TRUE	signal	correct	TRUE
219	523b21fa-16b0-11e8-b122-44a84224eb5b	2	2	topics5_12St_FiberNomSt_Serv_1_ShearNormalized_14_window1.png	topics5_12St_FiberConstSt_DBE_1_ShearNormalized_14_window1.png	topics5_12St_FiberTapSt_Serv_1_ShearNormalized_14_window1.png	1.11	14	1	1_ShearNormalized	2	FALSE	topic	correct	TRUE
220	523b21fa-16b0-11e8-b122-44a84224eb5b	2	2	signals12St_BHinge_DBE_1_ShearNormalized_08_window0.png	signals12St_FiberTapSt_DBE_1_ShearNormalized_08_window0.png	signals12St_BHinge_MCE_1_ShearNormalized_08_window0.png	1.23	8	0	1_ShearNormalized	1	TRUE	signal	correct	TRUE
221	523b21fa-16b0-11e8-b122-44a84224eb5b	2	2	topics5_12St_BHinge_Serv_1_ShearNormalized_40_window1.png	topics5_12St_FiberTapSt_Serv_1_ShearNormalized_40_window1.png	topics5_12St_BHinge_MCE_1_ShearNormalized_40_window1.png	1.11	40	1	1_ShearNormalized	3	FALSE	topic	correct	TRUE
222	523b21fa-16b0-11e8-b122-44a84224eb5b	2	2	topics5_12St_FiberNomSt_Serv_1_ShearNormalized_15_window0.png	topics5_12St_FiberTapSt_MCE_1_ShearNormalized_15_window0.png	topics5_12St_FiberConstSt_Serv_1_ShearNormalized_15_window0.png	1.27	15	0	1_ShearNormalized	2	FALSE	topic	correct	TRUE
223	523b21fa-16b0-11e8-b122-44a84224eb5b	2	2	signals12St_BHinge_MCE_1_ShearNormalized_50_window2.png	signals12St_FiberTapSt_MCE_1_ShearNormalized_50_window2.png	signals12St_BHinge_MCE_1_ShearNormalized_50_window2.png	1.89	50	2	1_ShearNormalized	0	TRUE	signal	correct	TRUE
224	523b21fa-16b0-11e8-b122-44a84224eb5b	1	2	signals12St_BHinge_Serv_1_ShearNormalized_07_window1.png	signals12St_BHinge_DBE_1_ShearNormalized_07_window1.png	signals12St_FiberConstSt_Serv_1_ShearNormalized_07_window1.png	1.8	7	1	1_ShearNormalized	3	TRUE	signal	incorrect	FALSE
225	523b21fa-16b0-11e8-b122-44a84224eb5b	1	1	signals12St_BHinge_DBE_1_ShearNormalized_40_window0.png	signals12St_BHinge_Serv_1_ShearNormalized_40_window0.png	signals12St_FiberTapSt_DBE_1_ShearNormalized_40_window0.png	1.74	40	0	1_ShearNormalized	3	TRUE	signal	correct	TRUE
226	523b21fa-16b0-11e8-b122-44a84224eb5b	2	2	signals12St_BHinge_MCE_1_ShearNormalized_25_window1.png	signals12St_FiberNomSt_MCE_1_ShearNormalized_25_window1.png	signals12St_BHinge_MCE_1_ShearNormalized_25_window1.png	1.15	25	1	1_ShearNormalized	0	TRUE	signal	correct	TRUE
227	523b21fa-16b0-11e8-b122-44a84224eb5b	1	1	signals12St_FiberConstSt_Serv_1_ShearNormalized_49_window0.png	signals12St_FiberNomSt_Serv_1_ShearNormalized_49_window0.png	signals12St_FiberTapSt_DBE_1_ShearNormalized_49_window0.png	1.35	49	0	1_ShearNormalized	2	TRUE	signal	correct	TRUE
228	523b21fa-16b0-11e8-b122-44a84224eb5b	1	2	signals12St_BHinge_MCE_1_ShearNormalized_01_window2.png	signals12St_BHinge_Serv_1_ShearNormalized_01_window2.png	signals12St_FiberConstSt_MCE_1_ShearNormalized_01_window2.png	1.42	1	2	1_ShearNormalized	3	TRUE	signal	incorrect	FALSE
229	523b21fa-16b0-11e8-b122-44a84224eb5b	2	2	topics5_12St_BHinge_Serv_1_ShearNormalized_07_window1.png	topics5_12St_FiberConstSt_Serv_1_ShearNormalized_07_window1.png	topics5_12St_BHinge_DBE_1_ShearNormalized_07_window1.png	1	7	1	1_ShearNormalized	3	FALSE	topic	correct	TRUE
230	523b21fa-16b0-11e8-b122-44a84224eb5b	1	2	signals12St_BHinge_Serv_1_ShearNormalized_40_window1.png	signals12St_BHinge_MCE_1_ShearNormalized_40_window1.png	signals12St_FiberTapSt_Serv_1_ShearNormalized_40_window1.png	1.56	40	1	1_ShearNormalized	3	TRUE	signal	incorrect	FALSE
231	523b21fa-16b0-11e8-b122-44a84224eb5b	2	2	signals12St_BHinge_MCE_1_ShearNormalized_34_window1.png	signals12St_FiberConstSt_MCE_1_ShearNormalized_34_window1.png	signals12St_BHinge_DBE_1_ShearNormalized_34_window1.png	1.78	34	1	1_ShearNormalized	1	TRUE	signal	correct	TRUE
232	523b21fa-16b0-11e8-b122-44a84224eb5b	1	1	topics5_12St_BHinge_DBE_1_ShearNormalized_50_window2.png	topics5_12St_BHinge_MCE_1_ShearNormalized_50_window2.png	topics5_12St_FiberNomSt_DBE_1_ShearNormalized_50_window2.png	1.76	50	2	1_ShearNormalized	1	FALSE	topic	correct	TRUE
233	523b21fa-16b0-11e8-b122-44a84224eb5b	2	2	topics5_12St_FiberConstSt_Serv_1_ShearNormalized_49_window0.png	topics5_12St_FiberTapSt_DBE_1_ShearNormalized_49_window0.png	topics5_12St_FiberNomSt_Serv_1_ShearNormalized_49_window0.png	1.56	49	0	1_ShearNormalized	2	FALSE	topic	correct	TRUE
234	523b21fa-16b0-11e8-b122-44a84224eb5b	1	1	topics5_12St_BHinge_MCE_1_ShearNormalized_50_window2.png	topics5_12St_BHinge_MCE_1_ShearNormalized_50_window2.png	topics5_12St_FiberTapSt_MCE_1_ShearNormalized_50_window2.png	0.96	50	2	1_ShearNormalized	0	FALSE	topic	correct	TRUE
235	523b21fa-16b0-11e8-b122-44a84224eb5b	2	2	signals12St_BHinge_DBE_1_ShearNormalized_50_window2.png	signals12St_FiberNomSt_DBE_1_ShearNormalized_50_window2.png	signals12St_BHinge_MCE_1_ShearNormalized_50_window2.png	1.7	50	2	1_ShearNormalized	1	TRUE	signal	correct	TRUE
236	523b21fa-16b0-11e8-b122-44a84224eb5b	1	2	signals12St_FiberNomSt_Serv_1_ShearNormalized_15_window0.png	signals12St_FiberConstSt_Serv_1_ShearNormalized_15_window0.png	signals12St_FiberTapSt_MCE_1_ShearNormalized_15_window0.png	1.35	15	0	1_ShearNormalized	2	TRUE	signal	incorrect	FALSE
237	523b21fa-16b0-11e8-b122-44a84224eb5b	2	2	topics5_12St_FiberTapSt_Serv_1_ShearNormalized_43_window2.png	topics5_12St_FiberConstSt_MCE_1_ShearNormalized_43_window2.png	topics5_12St_FiberNomSt_Serv_1_ShearNormalized_43_window2.png	1.22	43	2	1_ShearNormalized	2	FALSE	topic	correct	TRUE
238	523b21fa-16b0-11e8-b122-44a84224eb5b	2	2	signals12St_FiberTapSt_MCE_1_ShearNormalized_46_window1.png	signals12St_FiberConstSt_DBE_1_ShearNormalized_46_window1.png	signals12St_FiberNomSt_MCE_1_ShearNormalized_46_window1.png	1.32	46	1	1_ShearNormalized	4	TRUE	signal	correct	TRUE
239	5b8f79ac-1801-11e8-b122-44a84224eb5b	1	1	topics5_12St_BHinge_MCE_1_ShearNormalized_04_window1.png	topics5_12St_BHinge_DBE_1_ShearNormalized_04_window1.png	topics5_12St_FiberTapSt_MCE_1_ShearNormalized_04_window1.png	11.08	4	1	1_ShearNormalized	1	FALSE	topic	correct	TRUE
240	5b8f79ac-1801-11e8-b122-44a84224eb5b	2	1	topics5_12St_BHinge_Serv_1_ShearNormalized_24_window1.png	topics5_12St_FiberConstSt_Serv_1_ShearNormalized_24_window1.png	topics5_12St_BHinge_DBE_1_ShearNormalized_24_window1.png	20.03	24	1	1_ShearNormalized	3	FALSE	topic	incorrect	FALSE
241	5b8f79ac-1801-11e8-b122-44a84224eb5b	2	2	signals12St_BHinge_DBE_1_ShearNormalized_22_window0.png	signals12St_FiberConstSt_DBE_1_ShearNormalized_22_window0.png	signals12St_BHinge_MCE_1_ShearNormalized_22_window0.png	5.23	22	0	1_ShearNormalized	1	TRUE	signal	correct	TRUE
242	5b8f79ac-1801-11e8-b122-44a84224eb5b	1	2	topics5_12St_BHinge_DBE_1_ShearNormalized_36_window2.png	topics5_12St_BHinge_MCE_1_ShearNormalized_36_window2.png	topics5_12St_FiberNomSt_DBE_1_ShearNormalized_36_window2.png	23.17	36	2	1_ShearNormalized	1	FALSE	topic	incorrect	FALSE
243	5b8f79ac-1801-11e8-b122-44a84224eb5b	1	1	topics5_12St_BHinge_MCE_1_ShearNormalized_49_window2.png	topics5_12St_BHinge_MCE_1_ShearNormalized_49_window2.png	topics5_12St_FiberConstSt_MCE_1_ShearNormalized_49_window2.png	5.26	49	2	1_ShearNormalized	0	FALSE	topic	correct	TRUE
244	5b8f79ac-1801-11e8-b122-44a84224eb5b	2	1	topics5_12St_BHinge_DBE_1_ShearNormalized_03_window0.png	topics5_12St_FiberNomSt_DBE_1_ShearNormalized_03_window0.png	topics5_12St_BHinge_Serv_1_ShearNormalized_03_window0.png	13.04	3	0	1_ShearNormalized	3	FALSE	topic	incorrect	FALSE
245	5b8f79ac-1801-11e8-b122-44a84224eb5b	1	1	topics5_12St_BHinge_DBE_1_ShearNormalized_03_window1.png	topics5_12St_BHinge_MCE_1_ShearNormalized_03_window1.png	topics5_12St_FiberTapSt_DBE_1_ShearNormalized_03_window1.png	9.48	3	1	1_ShearNormalized	1	FALSE	topic	correct	TRUE
246	5b8f79ac-1801-11e8-b122-44a84224eb5b	1	1	topics5_12St_BHinge_MCE_1_ShearNormalized_23_window1.png	topics5_12St_BHinge_DBE_1_ShearNormalized_23_window1.png	topics5_12St_FiberNomSt_MCE_1_ShearNormalized_23_window1.png	6.31	23	1	1_ShearNormalized	1	FALSE	topic	correct	TRUE
247	5b8f79ac-1801-11e8-b122-44a84224eb5b	2	2	signals12St_BHinge_DBE_1_ShearNormalized_03_window1.png	signals12St_FiberTapSt_DBE_1_ShearNormalized_03_window1.png	signals12St_BHinge_MCE_1_ShearNormalized_03_window1.png	7.7	3	1	1_ShearNormalized	1	TRUE	signal	correct	TRUE
248	5b8f79ac-1801-11e8-b122-44a84224eb5b	2	2	signals12St_BHinge_MCE_1_ShearNormalized_49_window2.png	signals12St_FiberConstSt_MCE_1_ShearNormalized_49_window2.png	signals12St_BHinge_MCE_1_ShearNormalized_49_window2.png	10.17	49	2	1_ShearNormalized	0	TRUE	signal	correct	TRUE
249	5b8f79ac-1801-11e8-b122-44a84224eb5b	2	2	topics5_12St_FiberTapSt_Serv_1_ShearNormalized_15_window2.png	topics5_12St_FiberConstSt_DBE_1_ShearNormalized_15_window2.png	topics5_12St_FiberNomSt_Serv_1_ShearNormalized_15_window2.png	3.81	15	2	1_ShearNormalized	2	FALSE	topic	correct	TRUE
250	5b8f79ac-1801-11e8-b122-44a84224eb5b	1	2	topics5_12St_FiberConstSt_MCE_1_ShearNormalized_07_window0.png	topics5_12St_FiberNomSt_MCE_1_ShearNormalized_07_window0.png	topics5_12St_FiberTapSt_DBE_1_ShearNormalized_07_window0.png	11.31	7	0	1_ShearNormalized	4	FALSE	topic	incorrect	FALSE
251	5b8f79ac-1801-11e8-b122-44a84224eb5b	2	2	signals12St_FiberNomSt_MCE_1_ShearNormalized_31_window1.png	signals12St_FiberConstSt_DBE_1_ShearNormalized_31_window1.png	signals12St_FiberTapSt_MCE_1_ShearNormalized_31_window1.png	10.34	31	1	1_ShearNormalized	4	TRUE	signal	correct	TRUE
252	5b8f79ac-1801-11e8-b122-44a84224eb5b	1	1	signals12St_BHinge_Serv_1_ShearNormalized_24_window1.png	signals12St_BHinge_DBE_1_ShearNormalized_24_window1.png	signals12St_FiberConstSt_Serv_1_ShearNormalized_24_window1.png	17.83	24	1	1_ShearNormalized	3	TRUE	signal	correct	TRUE
253	5b8f79ac-1801-11e8-b122-44a84224eb5b	1	1	topics5_12St_BHinge_DBE_1_ShearNormalized_12_window2.png	topics5_12St_BHinge_DBE_1_ShearNormalized_12_window2.png	topics5_12St_FiberNomSt_DBE_1_ShearNormalized_12_window2.png	3.48	12	2	1_ShearNormalized	0	FALSE	topic	correct	TRUE
254	5b8f79ac-1801-11e8-b122-44a84224eb5b	1	1	topics5_12St_FiberNomSt_MCE_1_ShearNormalized_31_window1.png	topics5_12St_FiberTapSt_MCE_1_ShearNormalized_31_window1.png	topics5_12St_FiberConstSt_DBE_1_ShearNormalized_31_window1.png	4.49	31	1	1_ShearNormalized	4	FALSE	topic	correct	TRUE
255	5b8f79ac-1801-11e8-b122-44a84224eb5b	2	2	signals12St_BHinge_DBE_1_ShearNormalized_12_window2.png	signals12St_FiberNomSt_DBE_1_ShearNormalized_12_window2.png	signals12St_BHinge_DBE_1_ShearNormalized_12_window2.png	3.43	12	2	1_ShearNormalized	0	TRUE	signal	correct	TRUE
256	5b8f79ac-1801-11e8-b122-44a84224eb5b	2	2	topics5_12St_BHinge_Serv_1_ShearNormalized_21_window1.png	topics5_12St_FiberConstSt_Serv_1_ShearNormalized_21_window1.png	topics5_12St_BHinge_DBE_1_ShearNormalized_21_window1.png	9.46	21	1	1_ShearNormalized	3	FALSE	topic	correct	TRUE
257	5b8f79ac-1801-11e8-b122-44a84224eb5b	1	1	signals12St_FiberNomSt_Serv_1_ShearNormalized_42_window0.png	signals12St_FiberConstSt_Serv_1_ShearNormalized_42_window0.png	signals12St_FiberTapSt_DBE_1_ShearNormalized_42_window0.png	10.96	42	0	1_ShearNormalized	2	TRUE	signal	correct	TRUE
258	5b8f79ac-1801-11e8-b122-44a84224eb5b	2	2	signals12St_BHinge_MCE_1_ShearNormalized_02_window1.png	signals12St_FiberTapSt_MCE_1_ShearNormalized_02_window1.png	signals12St_BHinge_DBE_1_ShearNormalized_02_window1.png	4.74	2	1	1_ShearNormalized	1	TRUE	signal	correct	TRUE
259	5b8f79ac-1801-11e8-b122-44a84224eb5b	2	2	topics5_12St_BHinge_MCE_1_ShearNormalized_45_window1.png	topics5_12St_FiberNomSt_MCE_1_ShearNormalized_45_window1.png	topics5_12St_BHinge_Serv_1_ShearNormalized_45_window1.png	10.66	45	1	1_ShearNormalized	3	FALSE	topic	correct	TRUE
260	5b8f79ac-1801-11e8-b122-44a84224eb5b	2	1	signals12St_BHinge_MCE_1_ShearNormalized_04_window1.png	signals12St_FiberTapSt_MCE_1_ShearNormalized_04_window1.png	signals12St_BHinge_DBE_1_ShearNormalized_04_window1.png	5.94	4	1	1_ShearNormalized	1	TRUE	signal	incorrect	FALSE
261	5b8f79ac-1801-11e8-b122-44a84224eb5b	1	2	signals12St_BHinge_MCE_1_ShearNormalized_45_window1.png	signals12St_BHinge_Serv_1_ShearNormalized_45_window1.png	signals12St_FiberNomSt_MCE_1_ShearNormalized_45_window1.png	13.81	45	1	1_ShearNormalized	3	TRUE	signal	incorrect	FALSE
262	5b8f79ac-1801-11e8-b122-44a84224eb5b	1	1	signals12St_BHinge_DBE_1_ShearNormalized_03_window0.png	signals12St_BHinge_Serv_1_ShearNormalized_03_window0.png	signals12St_FiberNomSt_DBE_1_ShearNormalized_03_window0.png	13.4	3	0	1_ShearNormalized	3	TRUE	signal	correct	TRUE
263	5b8f79ac-1801-11e8-b122-44a84224eb5b	2	2	topics5_12St_FiberNomSt_Serv_1_ShearNormalized_42_window0.png	topics5_12St_FiberTapSt_DBE_1_ShearNormalized_42_window0.png	topics5_12St_FiberConstSt_Serv_1_ShearNormalized_42_window0.png	3.84	42	0	1_ShearNormalized	2	FALSE	topic	correct	TRUE
264	5b8f79ac-1801-11e8-b122-44a84224eb5b	1	1	topics5_12St_BHinge_DBE_1_ShearNormalized_22_window0.png	topics5_12St_BHinge_MCE_1_ShearNormalized_22_window0.png	topics5_12St_FiberConstSt_DBE_1_ShearNormalized_22_window0.png	3.84	22	0	1_ShearNormalized	1	FALSE	topic	correct	TRUE
265	5b8f79ac-1801-11e8-b122-44a84224eb5b	1	1	signals12St_BHinge_Serv_1_ShearNormalized_21_window1.png	signals12St_BHinge_DBE_1_ShearNormalized_21_window1.png	signals12St_FiberConstSt_Serv_1_ShearNormalized_21_window1.png	3.72	21	1	1_ShearNormalized	3	TRUE	signal	correct	TRUE
266	5b8f79ac-1801-11e8-b122-44a84224eb5b	1	1	topics5_12St_BHinge_MCE_1_ShearNormalized_02_window1.png	topics5_12St_BHinge_DBE_1_ShearNormalized_02_window1.png	topics5_12St_FiberTapSt_MCE_1_ShearNormalized_02_window1.png	14.6	2	1	1_ShearNormalized	1	FALSE	topic	correct	TRUE
267	5b8f79ac-1801-11e8-b122-44a84224eb5b	2	2	signals12St_FiberConstSt_MCE_1_ShearNormalized_39_window0.png	signals12St_FiberNomSt_DBE_1_ShearNormalized_39_window0.png	signals12St_FiberTapSt_MCE_1_ShearNormalized_39_window0.png	4.4	39	0	1_ShearNormalized	4	TRUE	signal	correct	TRUE
268	5b8f79ac-1801-11e8-b122-44a84224eb5b	2	1	signals12St_BHinge_MCE_1_ShearNormalized_23_window1.png	signals12St_FiberNomSt_MCE_1_ShearNormalized_23_window1.png	signals12St_BHinge_DBE_1_ShearNormalized_23_window1.png	6.52	23	1	1_ShearNormalized	1	TRUE	signal	incorrect	FALSE
269	5b8f79ac-1801-11e8-b122-44a84224eb5b	1	1	signals12St_FiberTapSt_Serv_1_ShearNormalized_15_window2.png	signals12St_FiberNomSt_Serv_1_ShearNormalized_15_window2.png	signals12St_FiberConstSt_DBE_1_ShearNormalized_15_window2.png	4.82	15	2	1_ShearNormalized	2	TRUE	signal	correct	TRUE
270	5b8f79ac-1801-11e8-b122-44a84224eb5b	1	1	topics5_12St_FiberConstSt_MCE_1_ShearNormalized_39_window0.png	topics5_12St_FiberTapSt_MCE_1_ShearNormalized_39_window0.png	topics5_12St_FiberNomSt_DBE_1_ShearNormalized_39_window0.png	10.08	39	0	1_ShearNormalized	4	FALSE	topic	correct	TRUE
271	5b8f79ac-1801-11e8-b122-44a84224eb5b	2	2	signals12St_BHinge_DBE_1_ShearNormalized_36_window2.png	signals12St_FiberNomSt_DBE_1_ShearNormalized_36_window2.png	signals12St_BHinge_MCE_1_ShearNormalized_36_window2.png	10.87	36	2	1_ShearNormalized	1	TRUE	signal	correct	TRUE
272	5b8f79ac-1801-11e8-b122-44a84224eb5b	2	2	signals12St_FiberConstSt_MCE_1_ShearNormalized_07_window0.png	signals12St_FiberTapSt_DBE_1_ShearNormalized_07_window0.png	signals12St_FiberNomSt_MCE_1_ShearNormalized_07_window0.png	6.59	7	0	1_ShearNormalized	4	TRUE	signal	correct	TRUE
273	815b1cf4-17fc-11e8-b122-44a84224eb5b	2	2	topics5_12St_BHinge_Serv_1_ShearNormalized_02_window0.png	topics5_12St_FiberConstSt_Serv_1_ShearNormalized_02_window0.png	topics5_12St_BHinge_DBE_1_ShearNormalized_02_window0.png	5.97	2	0	1_ShearNormalized	3	FALSE	topic	correct	TRUE
274	815b1cf4-17fc-11e8-b122-44a84224eb5b	2	2	topics5_12St_FiberNomSt_Serv_1_ShearNormalized_48_window1.png	topics5_12St_FiberTapSt_MCE_1_ShearNormalized_48_window1.png	topics5_12St_FiberConstSt_Serv_1_ShearNormalized_48_window1.png	7.83	48	1	1_ShearNormalized	2	FALSE	topic	correct	TRUE
275	815b1cf4-17fc-11e8-b122-44a84224eb5b	2	2	topics5_12St_FiberNomSt_Serv_1_ShearNormalized_09_window0.png	topics5_12St_FiberTapSt_DBE_1_ShearNormalized_09_window0.png	topics5_12St_FiberConstSt_Serv_1_ShearNormalized_09_window0.png	8.52	9	0	1_ShearNormalized	2	FALSE	topic	correct	TRUE
276	815b1cf4-17fc-11e8-b122-44a84224eb5b	2	2	signals12St_BHinge_MCE_1_ShearNormalized_32_window2.png	signals12St_FiberNomSt_MCE_1_ShearNormalized_32_window2.png	signals12St_BHinge_DBE_1_ShearNormalized_32_window2.png	11.83	32	2	1_ShearNormalized	1	TRUE	signal	correct	TRUE
277	815b1cf4-17fc-11e8-b122-44a84224eb5b	2	2	signals12St_FiberTapSt_MCE_1_ShearNormalized_32_window1.png	signals12St_FiberNomSt_DBE_1_ShearNormalized_32_window1.png	signals12St_FiberConstSt_MCE_1_ShearNormalized_32_window1.png	11.62	32	1	1_ShearNormalized	4	TRUE	signal	correct	TRUE
278	815b1cf4-17fc-11e8-b122-44a84224eb5b	1	2	signals12St_BHinge_Serv_1_ShearNormalized_43_window0.png	signals12St_BHinge_MCE_1_ShearNormalized_43_window0.png	signals12St_FiberNomSt_Serv_1_ShearNormalized_43_window0.png	11.72	43	0	1_ShearNormalized	3	TRUE	signal	incorrect	FALSE
279	815b1cf4-17fc-11e8-b122-44a84224eb5b	1	2	signals12St_BHinge_Serv_1_ShearNormalized_50_window0.png	signals12St_BHinge_DBE_1_ShearNormalized_50_window0.png	signals12St_FiberNomSt_Serv_1_ShearNormalized_50_window0.png	21.03	50	0	1_ShearNormalized	3	TRUE	signal	incorrect	FALSE
280	815b1cf4-17fc-11e8-b122-44a84224eb5b	1	1	topics5_12St_BHinge_DBE_1_ShearNormalized_47_window2.png	topics5_12St_BHinge_MCE_1_ShearNormalized_47_window2.png	topics5_12St_FiberConstSt_DBE_1_ShearNormalized_47_window2.png	9.82	47	2	1_ShearNormalized	1	FALSE	topic	correct	TRUE
281	815b1cf4-17fc-11e8-b122-44a84224eb5b	1	1	signals12St_BHinge_Serv_1_ShearNormalized_33_window0.png	signals12St_BHinge_DBE_1_ShearNormalized_33_window0.png	signals12St_FiberNomSt_Serv_1_ShearNormalized_33_window0.png	7.6	33	0	1_ShearNormalized	3	TRUE	signal	correct	TRUE
282	815b1cf4-17fc-11e8-b122-44a84224eb5b	1	1	topics5_12St_BHinge_MCE_1_ShearNormalized_32_window2.png	topics5_12St_BHinge_DBE_1_ShearNormalized_32_window2.png	topics5_12St_FiberNomSt_MCE_1_ShearNormalized_32_window2.png	11.19	32	2	1_ShearNormalized	1	FALSE	topic	correct	TRUE
283	815b1cf4-17fc-11e8-b122-44a84224eb5b	2	2	topics5_12St_FiberNomSt_Serv_1_ShearNormalized_32_window0.png	topics5_12St_FiberTapSt_DBE_1_ShearNormalized_32_window0.png	topics5_12St_FiberConstSt_Serv_1_ShearNormalized_32_window0.png	6.5	32	0	1_ShearNormalized	2	FALSE	topic	correct	TRUE
284	815b1cf4-17fc-11e8-b122-44a84224eb5b	2	2	signals12St_BHinge_DBE_1_ShearNormalized_39_window2.png	signals12St_FiberConstSt_DBE_1_ShearNormalized_39_window2.png	signals12St_BHinge_DBE_1_ShearNormalized_39_window2.png	6.7	39	2	1_ShearNormalized	0	TRUE	signal	correct	TRUE
285	815b1cf4-17fc-11e8-b122-44a84224eb5b	2	2	topics5_12St_BHinge_Serv_1_ShearNormalized_47_window2.png	topics5_12St_FiberTapSt_Serv_1_ShearNormalized_47_window2.png	topics5_12St_BHinge_DBE_1_ShearNormalized_47_window2.png	11.36	47	2	1_ShearNormalized	3	FALSE	topic	correct	TRUE
286	815b1cf4-17fc-11e8-b122-44a84224eb5b	2	2	signals12St_BHinge_MCE_1_ShearNormalized_42_window2.png	signals12St_FiberNomSt_MCE_1_ShearNormalized_42_window2.png	signals12St_BHinge_MCE_1_ShearNormalized_42_window2.png	9.22	42	2	1_ShearNormalized	0	TRUE	signal	correct	TRUE
287	815b1cf4-17fc-11e8-b122-44a84224eb5b	2	2	topics5_12St_FiberTapSt_Serv_1_ShearNormalized_21_window1.png	topics5_12St_FiberConstSt_MCE_1_ShearNormalized_21_window1.png	topics5_12St_FiberNomSt_Serv_1_ShearNormalized_21_window1.png	6.02	21	1	1_ShearNormalized	2	FALSE	topic	correct	TRUE
288	815b1cf4-17fc-11e8-b122-44a84224eb5b	1	2	topics5_12St_FiberNomSt_MCE_1_ShearNormalized_26_window2.png	topics5_12St_FiberConstSt_MCE_1_ShearNormalized_26_window2.png	topics5_12St_FiberTapSt_DBE_1_ShearNormalized_26_window2.png	15.2	26	2	1_ShearNormalized	4	FALSE	topic	incorrect	FALSE
289	815b1cf4-17fc-11e8-b122-44a84224eb5b	1	1	signals12St_BHinge_Serv_1_ShearNormalized_02_window0.png	signals12St_BHinge_DBE_1_ShearNormalized_02_window0.png	signals12St_FiberConstSt_Serv_1_ShearNormalized_02_window0.png	12.81	2	0	1_ShearNormalized	3	TRUE	signal	correct	TRUE
290	815b1cf4-17fc-11e8-b122-44a84224eb5b	1	1	signals12St_BHinge_Serv_1_ShearNormalized_47_window2.png	signals12St_BHinge_DBE_1_ShearNormalized_47_window2.png	signals12St_FiberTapSt_Serv_1_ShearNormalized_47_window2.png	11.02	47	2	1_ShearNormalized	3	TRUE	signal	correct	TRUE
291	815b1cf4-17fc-11e8-b122-44a84224eb5b	1	1	topics5_12St_BHinge_DBE_1_ShearNormalized_39_window2.png	topics5_12St_BHinge_DBE_1_ShearNormalized_39_window2.png	topics5_12St_FiberConstSt_DBE_1_ShearNormalized_39_window2.png	7.45	39	2	1_ShearNormalized	0	FALSE	topic	correct	TRUE
292	815b1cf4-17fc-11e8-b122-44a84224eb5b	1	1	signals12St_FiberNomSt_Serv_1_ShearNormalized_32_window0.png	signals12St_FiberConstSt_Serv_1_ShearNormalized_32_window0.png	signals12St_FiberTapSt_DBE_1_ShearNormalized_32_window0.png	9.16	32	0	1_ShearNormalized	2	TRUE	signal	correct	TRUE
293	815b1cf4-17fc-11e8-b122-44a84224eb5b	2	1	topics5_12St_BHinge_Serv_1_ShearNormalized_43_window0.png	topics5_12St_FiberNomSt_Serv_1_ShearNormalized_43_window0.png	topics5_12St_BHinge_MCE_1_ShearNormalized_43_window0.png	15.97	43	0	1_ShearNormalized	3	FALSE	topic	incorrect	FALSE
294	815b1cf4-17fc-11e8-b122-44a84224eb5b	2	2	signals12St_FiberNomSt_MCE_1_ShearNormalized_26_window2.png	signals12St_FiberTapSt_DBE_1_ShearNormalized_26_window2.png	signals12St_FiberConstSt_MCE_1_ShearNormalized_26_window2.png	12.42	26	2	1_ShearNormalized	4	TRUE	signal	correct	TRUE
295	815b1cf4-17fc-11e8-b122-44a84224eb5b	1	1	topics5_12St_FiberTapSt_MCE_1_ShearNormalized_32_window1.png	topics5_12St_FiberConstSt_MCE_1_ShearNormalized_32_window1.png	topics5_12St_FiberNomSt_DBE_1_ShearNormalized_32_window1.png	13.98	32	1	1_ShearNormalized	4	FALSE	topic	correct	TRUE
296	815b1cf4-17fc-11e8-b122-44a84224eb5b	1	1	signals12St_FiberConstSt_Serv_1_ShearNormalized_30_window0.png	signals12St_FiberNomSt_Serv_1_ShearNormalized_30_window0.png	signals12St_FiberTapSt_MCE_1_ShearNormalized_30_window0.png	14.45	30	0	1_ShearNormalized	2	TRUE	signal	correct	TRUE
297	815b1cf4-17fc-11e8-b122-44a84224eb5b	1	1	topics5_12St_BHinge_MCE_1_ShearNormalized_42_window2.png	topics5_12St_BHinge_MCE_1_ShearNormalized_42_window2.png	topics5_12St_FiberNomSt_MCE_1_ShearNormalized_42_window2.png	4.05	42	2	1_ShearNormalized	0	FALSE	topic	correct	TRUE
298	815b1cf4-17fc-11e8-b122-44a84224eb5b	1	1	signals12St_FiberTapSt_Serv_1_ShearNormalized_43_window0.png	signals12St_FiberNomSt_Serv_1_ShearNormalized_43_window0.png	signals12St_FiberConstSt_DBE_1_ShearNormalized_43_window0.png	10.86	43	0	1_ShearNormalized	2	TRUE	signal	correct	TRUE
299	815b1cf4-17fc-11e8-b122-44a84224eb5b	2	2	topics5_12St_FiberConstSt_Serv_1_ShearNormalized_30_window0.png	topics5_12St_FiberTapSt_MCE_1_ShearNormalized_30_window0.png	topics5_12St_FiberNomSt_Serv_1_ShearNormalized_30_window0.png	7.78	30	0	1_ShearNormalized	2	FALSE	topic	correct	TRUE
300	815b1cf4-17fc-11e8-b122-44a84224eb5b	2	2	topics5_12St_BHinge_Serv_1_ShearNormalized_50_window0.png	topics5_12St_FiberNomSt_Serv_1_ShearNormalized_50_window0.png	topics5_12St_BHinge_DBE_1_ShearNormalized_50_window0.png	10.08	50	0	1_ShearNormalized	3	FALSE	topic	correct	TRUE
301	815b1cf4-17fc-11e8-b122-44a84224eb5b	2	2	topics5_12St_BHinge_Serv_1_ShearNormalized_33_window0.png	topics5_12St_FiberNomSt_Serv_1_ShearNormalized_33_window0.png	topics5_12St_BHinge_DBE_1_ShearNormalized_33_window0.png	6	33	0	1_ShearNormalized	3	FALSE	topic	correct	TRUE
302	815b1cf4-17fc-11e8-b122-44a84224eb5b	1	2	signals12St_FiberTapSt_Serv_1_ShearNormalized_21_window1.png	signals12St_FiberNomSt_Serv_1_ShearNormalized_21_window1.png	signals12St_FiberConstSt_MCE_1_ShearNormalized_21_window1.png	10.86	21	1	1_ShearNormalized	2	TRUE	signal	incorrect	FALSE
303	815b1cf4-17fc-11e8-b122-44a84224eb5b	2	2	signals12St_BHinge_DBE_1_ShearNormalized_47_window2.png	signals12St_FiberConstSt_DBE_1_ShearNormalized_47_window2.png	signals12St_BHinge_MCE_1_ShearNormalized_47_window2.png	11.47	47	2	1_ShearNormalized	1	TRUE	signal	correct	TRUE
304	815b1cf4-17fc-11e8-b122-44a84224eb5b	1	1	signals12St_FiberNomSt_Serv_1_ShearNormalized_09_window0.png	signals12St_FiberConstSt_Serv_1_ShearNormalized_09_window0.png	signals12St_FiberTapSt_DBE_1_ShearNormalized_09_window0.png	7.59	9	0	1_ShearNormalized	2	TRUE	signal	correct	TRUE
305	815b1cf4-17fc-11e8-b122-44a84224eb5b	2	2	topics5_12St_FiberTapSt_Serv_1_ShearNormalized_43_window0.png	topics5_12St_FiberConstSt_DBE_1_ShearNormalized_43_window0.png	topics5_12St_FiberNomSt_Serv_1_ShearNormalized_43_window0.png	3.24	43	0	1_ShearNormalized	2	FALSE	topic	correct	TRUE
306	815b1cf4-17fc-11e8-b122-44a84224eb5b	1	1	signals12St_FiberNomSt_Serv_1_ShearNormalized_48_window1.png	signals12St_FiberConstSt_Serv_1_ShearNormalized_48_window1.png	signals12St_FiberTapSt_MCE_1_ShearNormalized_48_window1.png	10.96	48	1	1_ShearNormalized	2	TRUE	signal	correct	TRUE
307	9b56b6ba-1822-11e8-9c9e-784f43628f47	2	2	signals12St_FiberNomSt_MCE_1_ShearNormalized_44_window2.png	signals12St_FiberTapSt_DBE_1_ShearNormalized_44_window2.png	signals12St_FiberConstSt_MCE_1_ShearNormalized_44_window2.png	1.8	44	2	1_ShearNormalized	4	TRUE	signal	correct	TRUE
308	9b56b6ba-1822-11e8-9c9e-784f43628f47	2	2	topics5_12St_FiberNomSt_Serv_1_ShearNormalized_04_window1.png	topics5_12St_FiberTapSt_DBE_1_ShearNormalized_04_window1.png	topics5_12St_FiberConstSt_Serv_1_ShearNormalized_04_window1.png	1.04	4	1	1_ShearNormalized	2	FALSE	topic	correct	TRUE
309	9b56b6ba-1822-11e8-9c9e-784f43628f47	2	2	signals12St_BHinge_MCE_1_ShearNormalized_01_window0.png	signals12St_FiberConstSt_MCE_1_ShearNormalized_01_window0.png	signals12St_BHinge_DBE_1_ShearNormalized_01_window0.png	1.52	1	0	1_ShearNormalized	1	TRUE	signal	correct	TRUE
310	9b56b6ba-1822-11e8-9c9e-784f43628f47	2	2	signals12St_FiberConstSt_MCE_1_ShearNormalized_26_window1.png	signals12St_FiberTapSt_DBE_1_ShearNormalized_26_window1.png	signals12St_FiberNomSt_MCE_1_ShearNormalized_26_window1.png	2.76	26	1	1_ShearNormalized	4	TRUE	signal	correct	TRUE
311	9b56b6ba-1822-11e8-9c9e-784f43628f47	1	1	signals12St_FiberNomSt_Serv_1_ShearNormalized_11_window2.png	signals12St_FiberConstSt_Serv_1_ShearNormalized_11_window2.png	signals12St_FiberTapSt_DBE_1_ShearNormalized_11_window2.png	2.08	11	2	1_ShearNormalized	2	TRUE	signal	correct	TRUE
312	9b56b6ba-1822-11e8-9c9e-784f43628f47	2	2	topics5_12St_BHinge_Serv_1_ShearNormalized_13_window2.png	topics5_12St_FiberTapSt_Serv_1_ShearNormalized_13_window2.png	topics5_12St_BHinge_MCE_1_ShearNormalized_13_window2.png	1.12	13	2	1_ShearNormalized	3	FALSE	topic	correct	TRUE
313	9b56b6ba-1822-11e8-9c9e-784f43628f47	1	2	signals12St_BHinge_Serv_1_ShearNormalized_13_window2.png	signals12St_BHinge_MCE_1_ShearNormalized_13_window2.png	signals12St_FiberTapSt_Serv_1_ShearNormalized_13_window2.png	2.57	13	2	1_ShearNormalized	3	TRUE	signal	incorrect	FALSE
314	9b56b6ba-1822-11e8-9c9e-784f43628f47	2	1	signals12St_FiberTapSt_MCE_1_ShearNormalized_13_window1.png	signals12St_FiberNomSt_DBE_1_ShearNormalized_13_window1.png	signals12St_FiberConstSt_MCE_1_ShearNormalized_13_window1.png	1.96	13	1	1_ShearNormalized	4	TRUE	signal	incorrect	FALSE
315	9b56b6ba-1822-11e8-9c9e-784f43628f47	2	2	signals12St_BHinge_MCE_1_ShearNormalized_39_window2.png	signals12St_FiberNomSt_MCE_1_ShearNormalized_39_window2.png	signals12St_BHinge_MCE_1_ShearNormalized_39_window2.png	1.69	39	2	1_ShearNormalized	0	TRUE	signal	correct	TRUE
316	9b56b6ba-1822-11e8-9c9e-784f43628f47	1	1	topics5_12St_BHinge_MCE_1_ShearNormalized_01_window0.png	topics5_12St_BHinge_DBE_1_ShearNormalized_01_window0.png	topics5_12St_FiberConstSt_MCE_1_ShearNormalized_01_window0.png	1.15	1	0	1_ShearNormalized	1	FALSE	topic	correct	TRUE
317	9b56b6ba-1822-11e8-9c9e-784f43628f47	1	2	topics5_12St_FiberNomSt_MCE_1_ShearNormalized_44_window2.png	topics5_12St_FiberConstSt_MCE_1_ShearNormalized_44_window2.png	topics5_12St_FiberTapSt_DBE_1_ShearNormalized_44_window2.png	5.96	44	2	1_ShearNormalized	4	FALSE	topic	incorrect	FALSE
318	9b56b6ba-1822-11e8-9c9e-784f43628f47	1	2	signals12St_BHinge_DBE_1_ShearNormalized_39_window2.png	signals12St_BHinge_Serv_1_ShearNormalized_39_window2.png	signals12St_FiberNomSt_DBE_1_ShearNormalized_39_window2.png	1.51	39	2	1_ShearNormalized	3	TRUE	signal	incorrect	FALSE
319	9b56b6ba-1822-11e8-9c9e-784f43628f47	1	2	signals12St_BHinge_Serv_1_ShearNormalized_41_window0.png	signals12St_BHinge_MCE_1_ShearNormalized_41_window0.png	signals12St_FiberConstSt_Serv_1_ShearNormalized_41_window0.png	1.33	41	0	1_ShearNormalized	3	TRUE	signal	incorrect	FALSE
320	9b56b6ba-1822-11e8-9c9e-784f43628f47	1	1	topics5_12St_FiberConstSt_MCE_1_ShearNormalized_48_window2.png	topics5_12St_FiberTapSt_MCE_1_ShearNormalized_48_window2.png	topics5_12St_FiberNomSt_DBE_1_ShearNormalized_48_window2.png	1.35	48	2	1_ShearNormalized	4	FALSE	topic	correct	TRUE
321	9b56b6ba-1822-11e8-9c9e-784f43628f47	2	2	signals12St_BHinge_MCE_1_ShearNormalized_05_window1.png	signals12St_FiberNomSt_MCE_1_ShearNormalized_05_window1.png	signals12St_BHinge_MCE_1_ShearNormalized_05_window1.png	1.94	5	1	1_ShearNormalized	0	TRUE	signal	correct	TRUE
322	9b56b6ba-1822-11e8-9c9e-784f43628f47	2	2	signals12St_FiberConstSt_MCE_1_ShearNormalized_48_window2.png	signals12St_FiberNomSt_DBE_1_ShearNormalized_48_window2.png	signals12St_FiberTapSt_MCE_1_ShearNormalized_48_window2.png	2.68	48	2	1_ShearNormalized	4	TRUE	signal	correct	TRUE
323	9b56b6ba-1822-11e8-9c9e-784f43628f47	2	2	signals12St_BHinge_DBE_1_ShearNormalized_17_window0.png	signals12St_FiberTapSt_DBE_1_ShearNormalized_17_window0.png	signals12St_BHinge_MCE_1_ShearNormalized_17_window0.png	1.16	17	0	1_ShearNormalized	1	TRUE	signal	correct	TRUE
324	9b56b6ba-1822-11e8-9c9e-784f43628f47	2	1	topics5_12St_BHinge_DBE_1_ShearNormalized_39_window2.png	topics5_12St_FiberNomSt_DBE_1_ShearNormalized_39_window2.png	topics5_12St_BHinge_Serv_1_ShearNormalized_39_window2.png	3.74	39	2	1_ShearNormalized	3	FALSE	topic	incorrect	FALSE
325	9b56b6ba-1822-11e8-9c9e-784f43628f47	2	1	topics5_12St_BHinge_DBE_1_ShearNormalized_13_window1.png	topics5_12St_FiberTapSt_DBE_1_ShearNormalized_13_window1.png	topics5_12St_BHinge_Serv_1_ShearNormalized_13_window1.png	3.26	13	1	1_ShearNormalized	3	FALSE	topic	incorrect	FALSE
326	9b56b6ba-1822-11e8-9c9e-784f43628f47	1	2	signals12St_BHinge_DBE_1_ShearNormalized_13_window1.png	signals12St_BHinge_Serv_1_ShearNormalized_13_window1.png	signals12St_FiberTapSt_DBE_1_ShearNormalized_13_window1.png	1.17	13	1	1_ShearNormalized	3	TRUE	signal	incorrect	FALSE
327	9b56b6ba-1822-11e8-9c9e-784f43628f47	1	1	topics5_12St_BHinge_DBE_1_ShearNormalized_34_window0.png	topics5_12St_BHinge_MCE_1_ShearNormalized_34_window0.png	topics5_12St_FiberTapSt_DBE_1_ShearNormalized_34_window0.png	1.38	34	0	1_ShearNormalized	1	FALSE	topic	correct	TRUE
328	9b56b6ba-1822-11e8-9c9e-784f43628f47	1	1	topics5_12St_FiberTapSt_MCE_1_ShearNormalized_13_window1.png	topics5_12St_FiberConstSt_MCE_1_ShearNormalized_13_window1.png	topics5_12St_FiberNomSt_DBE_1_ShearNormalized_13_window1.png	1.84	13	1	1_ShearNormalized	4	FALSE	topic	correct	TRUE
329	9b56b6ba-1822-11e8-9c9e-784f43628f47	1	1	topics5_12St_BHinge_DBE_1_ShearNormalized_17_window0.png	topics5_12St_BHinge_MCE_1_ShearNormalized_17_window0.png	topics5_12St_FiberTapSt_DBE_1_ShearNormalized_17_window0.png	1.22	17	0	1_ShearNormalized	1	FALSE	topic	correct	TRUE
330	9b56b6ba-1822-11e8-9c9e-784f43628f47	2	2	topics5_12St_BHinge_Serv_1_ShearNormalized_41_window0.png	topics5_12St_FiberConstSt_Serv_1_ShearNormalized_41_window0.png	topics5_12St_BHinge_MCE_1_ShearNormalized_41_window0.png	2.56	41	0	1_ShearNormalized	3	FALSE	topic	correct	TRUE
331	9b56b6ba-1822-11e8-9c9e-784f43628f47	1	1	topics5_12St_BHinge_MCE_1_ShearNormalized_39_window2.png	topics5_12St_BHinge_MCE_1_ShearNormalized_39_window2.png	topics5_12St_FiberNomSt_MCE_1_ShearNormalized_39_window2.png	1.21	39	2	1_ShearNormalized	0	FALSE	topic	correct	TRUE
332	9b56b6ba-1822-11e8-9c9e-784f43628f47	1	2	topics5_12St_FiberConstSt_MCE_1_ShearNormalized_26_window1.png	topics5_12St_FiberNomSt_MCE_1_ShearNormalized_26_window1.png	topics5_12St_FiberTapSt_DBE_1_ShearNormalized_26_window1.png	3.05	26	1	1_ShearNormalized	4	FALSE	topic	incorrect	FALSE
333	9b56b6ba-1822-11e8-9c9e-784f43628f47	1	1	topics5_12St_BHinge_MCE_1_ShearNormalized_05_window1.png	topics5_12St_BHinge_MCE_1_ShearNormalized_05_window1.png	topics5_12St_FiberNomSt_MCE_1_ShearNormalized_05_window1.png	1.16	5	1	1_ShearNormalized	0	FALSE	topic	correct	TRUE
334	9b56b6ba-1822-11e8-9c9e-784f43628f47	2	2	topics5_12St_FiberNomSt_Serv_1_ShearNormalized_11_window2.png	topics5_12St_FiberTapSt_DBE_1_ShearNormalized_11_window2.png	topics5_12St_FiberConstSt_Serv_1_ShearNormalized_11_window2.png	1.24	11	2	1_ShearNormalized	2	FALSE	topic	correct	TRUE
335	9b56b6ba-1822-11e8-9c9e-784f43628f47	1	1	topics5_12St_FiberTapSt_MCE_1_ShearNormalized_37_window0.png	topics5_12St_FiberConstSt_MCE_1_ShearNormalized_37_window0.png	topics5_12St_FiberNomSt_DBE_1_ShearNormalized_37_window0.png	3.56	37	0	1_ShearNormalized	4	FALSE	topic	correct	TRUE
336	9b56b6ba-1822-11e8-9c9e-784f43628f47	2	2	signals12St_FiberTapSt_MCE_1_ShearNormalized_37_window0.png	signals12St_FiberNomSt_DBE_1_ShearNormalized_37_window0.png	signals12St_FiberConstSt_MCE_1_ShearNormalized_37_window0.png	1.93	37	0	1_ShearNormalized	4	TRUE	signal	correct	TRUE
337	9b56b6ba-1822-11e8-9c9e-784f43628f47	1	1	signals12St_FiberNomSt_Serv_1_ShearNormalized_04_window1.png	signals12St_FiberConstSt_Serv_1_ShearNormalized_04_window1.png	signals12St_FiberTapSt_DBE_1_ShearNormalized_04_window1.png	2.5	4	1	1_ShearNormalized	2	TRUE	signal	correct	TRUE
338	9b56b6ba-1822-11e8-9c9e-784f43628f47	1	1	topics5_12St_BHinge_DBE_1_ShearNormalized_50_window2.png	topics5_12St_BHinge_MCE_1_ShearNormalized_50_window2.png	topics5_12St_FiberTapSt_DBE_1_ShearNormalized_50_window2.png	1.37	50	2	1_ShearNormalized	1	FALSE	topic	correct	TRUE
339	9b56b6ba-1822-11e8-9c9e-784f43628f47	2	1	signals12St_BHinge_DBE_1_ShearNormalized_50_window2.png	signals12St_FiberTapSt_DBE_1_ShearNormalized_50_window2.png	signals12St_BHinge_MCE_1_ShearNormalized_50_window2.png	2.69	50	2	1_ShearNormalized	1	TRUE	signal	incorrect	FALSE
340	9b56b6ba-1822-11e8-9c9e-784f43628f47	2	2	signals12St_BHinge_DBE_1_ShearNormalized_34_window0.png	signals12St_FiberTapSt_DBE_1_ShearNormalized_34_window0.png	signals12St_BHinge_MCE_1_ShearNormalized_34_window0.png	1.18	34	0	1_ShearNormalized	1	TRUE	signal	correct	TRUE
341	a033f5de-176f-11e8-b122-44a84224eb5b	2	1	signals12St_FiberTapSt_MCE_1_ShearNormalized_02_window1.png	signals12St_FiberNomSt_DBE_1_ShearNormalized_02_window1.png	signals12St_FiberConstSt_MCE_1_ShearNormalized_02_window1.png	3.48	2	1	1_ShearNormalized	4	TRUE	signal	incorrect	FALSE
342	a033f5de-176f-11e8-b122-44a84224eb5b	2	2	signals12St_BHinge_DBE_1_ShearNormalized_29_window1.png	signals12St_FiberConstSt_DBE_1_ShearNormalized_29_window1.png	signals12St_BHinge_MCE_1_ShearNormalized_29_window1.png	3.47	29	1	1_ShearNormalized	1	TRUE	signal	correct	TRUE
343	a033f5de-176f-11e8-b122-44a84224eb5b	2	1	signals12St_FiberTapSt_MCE_1_ShearNormalized_11_window1.png	signals12St_FiberNomSt_DBE_1_ShearNormalized_11_window1.png	signals12St_FiberConstSt_MCE_1_ShearNormalized_11_window1.png	5.42	11	1	1_ShearNormalized	4	TRUE	signal	incorrect	FALSE
344	a033f5de-176f-11e8-b122-44a84224eb5b	1	1	topics5_12St_BHinge_DBE_1_ShearNormalized_29_window1.png	topics5_12St_BHinge_MCE_1_ShearNormalized_29_window1.png	topics5_12St_FiberConstSt_DBE_1_ShearNormalized_29_window1.png	3.56	29	1	1_ShearNormalized	1	FALSE	topic	correct	TRUE
345	a033f5de-176f-11e8-b122-44a84224eb5b	1	1	topics5_12St_FiberTapSt_MCE_1_ShearNormalized_09_window2.png	topics5_12St_FiberNomSt_MCE_1_ShearNormalized_09_window2.png	topics5_12St_FiberConstSt_DBE_1_ShearNormalized_09_window2.png	3.96	9	2	1_ShearNormalized	4	FALSE	topic	correct	TRUE
346	a033f5de-176f-11e8-b122-44a84224eb5b	1	2	topics5_12St_FiberTapSt_MCE_1_ShearNormalized_02_window1.png	topics5_12St_FiberConstSt_MCE_1_ShearNormalized_02_window1.png	topics5_12St_FiberNomSt_DBE_1_ShearNormalized_02_window1.png	9.26	2	1	1_ShearNormalized	4	FALSE	topic	incorrect	FALSE
347	a033f5de-176f-11e8-b122-44a84224eb5b	2	1	topics5_12St_BHinge_MCE_1_ShearNormalized_02_window2.png	topics5_12St_FiberConstSt_MCE_1_ShearNormalized_02_window2.png	topics5_12St_BHinge_Serv_1_ShearNormalized_02_window2.png	6.5	2	2	1_ShearNormalized	3	FALSE	topic	incorrect	FALSE
348	a033f5de-176f-11e8-b122-44a84224eb5b	1	1	topics5_12St_BHinge_MCE_1_ShearNormalized_25_window2.png	topics5_12St_BHinge_MCE_1_ShearNormalized_25_window2.png	topics5_12St_FiberTapSt_MCE_1_ShearNormalized_25_window2.png	3.71	25	2	1_ShearNormalized	0	FALSE	topic	correct	TRUE
349	a033f5de-176f-11e8-b122-44a84224eb5b	2	1	signals12St_BHinge_MCE_1_ShearNormalized_38_window1.png	signals12St_FiberConstSt_MCE_1_ShearNormalized_38_window1.png	signals12St_BHinge_DBE_1_ShearNormalized_38_window1.png	8.64	38	1	1_ShearNormalized	1	TRUE	signal	incorrect	FALSE
350	a033f5de-176f-11e8-b122-44a84224eb5b	2	1	topics5_12St_BHinge_MCE_1_ShearNormalized_30_window1.png	topics5_12St_FiberNomSt_MCE_1_ShearNormalized_30_window1.png	topics5_12St_BHinge_Serv_1_ShearNormalized_30_window1.png	3.96	30	1	1_ShearNormalized	3	FALSE	topic	incorrect	FALSE
351	a033f5de-176f-11e8-b122-44a84224eb5b	2	1	signals12St_BHinge_DBE_1_ShearNormalized_44_window0.png	signals12St_FiberNomSt_DBE_1_ShearNormalized_44_window0.png	signals12St_BHinge_MCE_1_ShearNormalized_44_window0.png	8.48	44	0	1_ShearNormalized	1	TRUE	signal	incorrect	FALSE
352	a033f5de-176f-11e8-b122-44a84224eb5b	1	2	signals12St_BHinge_DBE_1_ShearNormalized_17_window1.png	signals12St_BHinge_Serv_1_ShearNormalized_17_window1.png	signals12St_FiberNomSt_DBE_1_ShearNormalized_17_window1.png	7.2	17	1	1_ShearNormalized	3	TRUE	signal	incorrect	FALSE
353	a033f5de-176f-11e8-b122-44a84224eb5b	2	2	signals12St_BHinge_DBE_1_ShearNormalized_19_window2.png	signals12St_FiberConstSt_DBE_1_ShearNormalized_19_window2.png	signals12St_BHinge_MCE_1_ShearNormalized_19_window2.png	5.94	19	2	1_ShearNormalized	1	TRUE	signal	correct	TRUE
354	a033f5de-176f-11e8-b122-44a84224eb5b	1	1	signals12St_BHinge_MCE_1_ShearNormalized_02_window2.png	signals12St_BHinge_Serv_1_ShearNormalized_02_window2.png	signals12St_FiberConstSt_MCE_1_ShearNormalized_02_window2.png	9.3	2	2	1_ShearNormalized	3	TRUE	signal	correct	TRUE
355	a033f5de-176f-11e8-b122-44a84224eb5b	2	2	signals12St_FiberTapSt_MCE_1_ShearNormalized_09_window2.png	signals12St_FiberConstSt_DBE_1_ShearNormalized_09_window2.png	signals12St_FiberNomSt_MCE_1_ShearNormalized_09_window2.png	8.11	9	2	1_ShearNormalized	4	TRUE	signal	correct	TRUE
356	a033f5de-176f-11e8-b122-44a84224eb5b	2	2	signals12St_FiberTapSt_MCE_1_ShearNormalized_45_window1.png	signals12St_FiberConstSt_DBE_1_ShearNormalized_45_window1.png	signals12St_FiberNomSt_MCE_1_ShearNormalized_45_window1.png	5.05	45	1	1_ShearNormalized	4	TRUE	signal	correct	TRUE
357	a033f5de-176f-11e8-b122-44a84224eb5b	1	1	topics5_12St_BHinge_DBE_1_ShearNormalized_19_window2.png	topics5_12St_BHinge_MCE_1_ShearNormalized_19_window2.png	topics5_12St_FiberConstSt_DBE_1_ShearNormalized_19_window2.png	3.38	19	2	1_ShearNormalized	1	FALSE	topic	correct	TRUE
358	a033f5de-176f-11e8-b122-44a84224eb5b	1	1	topics5_12St_BHinge_MCE_1_ShearNormalized_05_window2.png	topics5_12St_BHinge_DBE_1_ShearNormalized_05_window2.png	topics5_12St_FiberTapSt_MCE_1_ShearNormalized_05_window2.png	9.64	5	2	1_ShearNormalized	1	FALSE	topic	correct	TRUE
359	a033f5de-176f-11e8-b122-44a84224eb5b	1	1	topics5_12St_BHinge_MCE_1_ShearNormalized_02_window2.png	topics5_12St_BHinge_MCE_1_ShearNormalized_02_window2.png	topics5_12St_FiberConstSt_MCE_1_ShearNormalized_02_window2.png	2.34	2	2	1_ShearNormalized	0	FALSE	topic	correct	TRUE
360	a033f5de-176f-11e8-b122-44a84224eb5b	1	1	signals12St_FiberNomSt_Serv_1_ShearNormalized_04_window1.png	signals12St_FiberTapSt_Serv_1_ShearNormalized_04_window1.png	signals12St_FiberConstSt_MCE_1_ShearNormalized_04_window1.png	4.33	4	1	1_ShearNormalized	2	TRUE	signal	correct	TRUE
361	a033f5de-176f-11e8-b122-44a84224eb5b	1	2	signals12St_BHinge_DBE_1_ShearNormalized_26_window0.png	signals12St_BHinge_Serv_1_ShearNormalized_26_window0.png	signals12St_FiberConstSt_DBE_1_ShearNormalized_26_window0.png	5.43	26	0	1_ShearNormalized	3	TRUE	signal	incorrect	FALSE
362	a033f5de-176f-11e8-b122-44a84224eb5b	2	2	signals12St_BHinge_MCE_1_ShearNormalized_05_window2.png	signals12St_FiberTapSt_MCE_1_ShearNormalized_05_window2.png	signals12St_BHinge_DBE_1_ShearNormalized_05_window2.png	8.3	5	2	1_ShearNormalized	1	TRUE	signal	correct	TRUE
363	a033f5de-176f-11e8-b122-44a84224eb5b	1	2	signals12St_BHinge_MCE_1_ShearNormalized_30_window1.png	signals12St_BHinge_Serv_1_ShearNormalized_30_window1.png	signals12St_FiberNomSt_MCE_1_ShearNormalized_30_window1.png	3.02	30	1	1_ShearNormalized	3	TRUE	signal	incorrect	FALSE
364	a033f5de-176f-11e8-b122-44a84224eb5b	1	2	topics5_12St_FiberTapSt_MCE_1_ShearNormalized_45_window1.png	topics5_12St_FiberNomSt_MCE_1_ShearNormalized_45_window1.png	topics5_12St_FiberConstSt_DBE_1_ShearNormalized_45_window1.png	3.65	45	1	1_ShearNormalized	4	FALSE	topic	incorrect	FALSE
365	a033f5de-176f-11e8-b122-44a84224eb5b	1	1	topics5_12St_BHinge_DBE_1_ShearNormalized_44_window0.png	topics5_12St_BHinge_MCE_1_ShearNormalized_44_window0.png	topics5_12St_FiberNomSt_DBE_1_ShearNormalized_44_window0.png	4.72	44	0	1_ShearNormalized	1	FALSE	topic	correct	TRUE
366	a033f5de-176f-11e8-b122-44a84224eb5b	2	1	topics5_12St_BHinge_DBE_1_ShearNormalized_17_window1.png	topics5_12St_FiberNomSt_DBE_1_ShearNormalized_17_window1.png	topics5_12St_BHinge_Serv_1_ShearNormalized_17_window1.png	12.6	17	1	1_ShearNormalized	3	FALSE	topic	incorrect	FALSE
367	a033f5de-176f-11e8-b122-44a84224eb5b	2	2	signals12St_BHinge_DBE_1_ShearNormalized_32_window1.png	signals12St_FiberTapSt_DBE_1_ShearNormalized_32_window1.png	signals12St_BHinge_MCE_1_ShearNormalized_32_window1.png	3.93	32	1	1_ShearNormalized	1	TRUE	signal	correct	TRUE
368	a033f5de-176f-11e8-b122-44a84224eb5b	2	2	signals12St_BHinge_MCE_1_ShearNormalized_25_window2.png	signals12St_FiberTapSt_MCE_1_ShearNormalized_25_window2.png	signals12St_BHinge_MCE_1_ShearNormalized_25_window2.png	4.3	25	2	1_ShearNormalized	0	TRUE	signal	correct	TRUE
369	a033f5de-176f-11e8-b122-44a84224eb5b	1	1	topics5_12St_FiberTapSt_MCE_1_ShearNormalized_11_window1.png	topics5_12St_FiberConstSt_MCE_1_ShearNormalized_11_window1.png	topics5_12St_FiberNomSt_DBE_1_ShearNormalized_11_window1.png	10.48	11	1	1_ShearNormalized	4	FALSE	topic	correct	TRUE
370	a033f5de-176f-11e8-b122-44a84224eb5b	2	2	topics5_12St_FiberNomSt_Serv_1_ShearNormalized_04_window1.png	topics5_12St_FiberConstSt_MCE_1_ShearNormalized_04_window1.png	topics5_12St_FiberTapSt_Serv_1_ShearNormalized_04_window1.png	3.29	4	1	1_ShearNormalized	2	FALSE	topic	correct	TRUE
371	a033f5de-176f-11e8-b122-44a84224eb5b	2	2	topics5_12St_BHinge_DBE_1_ShearNormalized_26_window0.png	topics5_12St_FiberConstSt_DBE_1_ShearNormalized_26_window0.png	topics5_12St_BHinge_Serv_1_ShearNormalized_26_window0.png	5.26	26	0	1_ShearNormalized	3	FALSE	topic	correct	TRUE
372	a033f5de-176f-11e8-b122-44a84224eb5b	1	1	topics5_12St_BHinge_MCE_1_ShearNormalized_38_window1.png	topics5_12St_BHinge_DBE_1_ShearNormalized_38_window1.png	topics5_12St_FiberConstSt_MCE_1_ShearNormalized_38_window1.png	2.86	38	1	1_ShearNormalized	1	FALSE	topic	correct	TRUE
373	a033f5de-176f-11e8-b122-44a84224eb5b	1	1	topics5_12St_BHinge_DBE_1_ShearNormalized_32_window1.png	topics5_12St_BHinge_MCE_1_ShearNormalized_32_window1.png	topics5_12St_FiberTapSt_DBE_1_ShearNormalized_32_window1.png	2.77	32	1	1_ShearNormalized	1	FALSE	topic	correct	TRUE
374	a033f5de-176f-11e8-b122-44a84224eb5b	2	2	signals12St_BHinge_MCE_1_ShearNormalized_02_window2.png	signals12St_FiberConstSt_MCE_1_ShearNormalized_02_window2.png	signals12St_BHinge_MCE_1_ShearNormalized_02_window2.png	3.82	2	2	1_ShearNormalized	0	TRUE	signal	correct	TRUE
375	a3656bf8-1809-11e8-b122-44a84224eb5b	1	1	topics5_12St_BHinge_MCE_1_ShearNormalized_08_window0.png	topics5_12St_BHinge_DBE_1_ShearNormalized_08_window0.png	topics5_12St_FiberConstSt_MCE_1_ShearNormalized_08_window0.png	3.76	8	0	1_ShearNormalized	1	FALSE	topic	correct	TRUE
376	a3656bf8-1809-11e8-b122-44a84224eb5b	1	1	topics5_12St_FiberNomSt_MCE_1_ShearNormalized_25_window0.png	topics5_12St_FiberConstSt_MCE_1_ShearNormalized_25_window0.png	topics5_12St_FiberTapSt_DBE_1_ShearNormalized_25_window0.png	6.83	25	0	1_ShearNormalized	4	FALSE	topic	correct	TRUE
377	a3656bf8-1809-11e8-b122-44a84224eb5b	2	2	topics5_12St_FiberConstSt_Serv_1_ShearNormalized_42_window1.png	topics5_12St_FiberNomSt_DBE_1_ShearNormalized_42_window1.png	topics5_12St_FiberTapSt_Serv_1_ShearNormalized_42_window1.png	4.32	42	1	1_ShearNormalized	2	FALSE	topic	correct	TRUE
378	a3656bf8-1809-11e8-b122-44a84224eb5b	2	2	signals12St_BHinge_DBE_1_ShearNormalized_47_window1.png	signals12St_FiberConstSt_DBE_1_ShearNormalized_47_window1.png	signals12St_BHinge_MCE_1_ShearNormalized_47_window1.png	9.6	47	1	1_ShearNormalized	1	TRUE	signal	correct	TRUE
379	a3656bf8-1809-11e8-b122-44a84224eb5b	1	1	topics5_12St_FiberConstSt_MCE_1_ShearNormalized_08_window2.png	topics5_12St_FiberNomSt_MCE_1_ShearNormalized_08_window2.png	topics5_12St_FiberTapSt_DBE_1_ShearNormalized_08_window2.png	8.15	8	2	1_ShearNormalized	4	FALSE	topic	correct	TRUE
380	a3656bf8-1809-11e8-b122-44a84224eb5b	2	2	topics5_12St_FiberNomSt_Serv_1_ShearNormalized_23_window1.png	topics5_12St_FiberTapSt_MCE_1_ShearNormalized_23_window1.png	topics5_12St_FiberConstSt_Serv_1_ShearNormalized_23_window1.png	2.82	23	1	1_ShearNormalized	2	FALSE	topic	correct	TRUE
381	a3656bf8-1809-11e8-b122-44a84224eb5b	2	2	signals12St_BHinge_MCE_1_ShearNormalized_07_window0.png	signals12St_FiberNomSt_MCE_1_ShearNormalized_07_window0.png	signals12St_BHinge_MCE_1_ShearNormalized_07_window0.png	7.77	7	0	1_ShearNormalized	0	TRUE	signal	correct	TRUE
382	a3656bf8-1809-11e8-b122-44a84224eb5b	2	2	signals12St_FiberConstSt_MCE_1_ShearNormalized_44_window0.png	signals12St_FiberNomSt_DBE_1_ShearNormalized_44_window0.png	signals12St_FiberTapSt_MCE_1_ShearNormalized_44_window0.png	5.35	44	0	1_ShearNormalized	4	TRUE	signal	correct	TRUE
383	a3656bf8-1809-11e8-b122-44a84224eb5b	1	1	topics5_12St_BHinge_DBE_1_ShearNormalized_47_window1.png	topics5_12St_BHinge_MCE_1_ShearNormalized_47_window1.png	topics5_12St_FiberConstSt_DBE_1_ShearNormalized_47_window1.png	2.58	47	1	1_ShearNormalized	1	FALSE	topic	correct	TRUE
384	a3656bf8-1809-11e8-b122-44a84224eb5b	1	1	topics5_12St_BHinge_MCE_1_ShearNormalized_07_window0.png	topics5_12St_BHinge_MCE_1_ShearNormalized_07_window0.png	topics5_12St_FiberNomSt_MCE_1_ShearNormalized_07_window0.png	2.8	7	0	1_ShearNormalized	0	FALSE	topic	correct	TRUE
385	a3656bf8-1809-11e8-b122-44a84224eb5b	1	1	signals12St_FiberNomSt_Serv_1_ShearNormalized_23_window1.png	signals12St_FiberConstSt_Serv_1_ShearNormalized_23_window1.png	signals12St_FiberTapSt_MCE_1_ShearNormalized_23_window1.png	9.74	23	1	1_ShearNormalized	2	TRUE	signal	correct	TRUE
386	a3656bf8-1809-11e8-b122-44a84224eb5b	2	2	signals12St_FiberTapSt_MCE_1_ShearNormalized_40_window1.png	signals12St_FiberConstSt_DBE_1_ShearNormalized_40_window1.png	signals12St_FiberNomSt_MCE_1_ShearNormalized_40_window1.png	12.35	40	1	1_ShearNormalized	4	TRUE	signal	correct	TRUE
387	a3656bf8-1809-11e8-b122-44a84224eb5b	1	1	topics5_12St_BHinge_MCE_1_ShearNormalized_18_window0.png	topics5_12St_BHinge_DBE_1_ShearNormalized_18_window0.png	topics5_12St_FiberTapSt_MCE_1_ShearNormalized_18_window0.png	10.21	18	0	1_ShearNormalized	1	FALSE	topic	correct	TRUE
388	a3656bf8-1809-11e8-b122-44a84224eb5b	1	1	topics5_12St_BHinge_DBE_1_ShearNormalized_45_window1.png	topics5_12St_BHinge_MCE_1_ShearNormalized_45_window1.png	topics5_12St_FiberTapSt_DBE_1_ShearNormalized_45_window1.png	8.49	45	1	1_ShearNormalized	1	FALSE	topic	correct	TRUE
389	a3656bf8-1809-11e8-b122-44a84224eb5b	1	1	topics5_12St_FiberConstSt_MCE_1_ShearNormalized_49_window1.png	topics5_12St_FiberNomSt_MCE_1_ShearNormalized_49_window1.png	topics5_12St_FiberTapSt_DBE_1_ShearNormalized_49_window1.png	9.72	49	1	1_ShearNormalized	4	FALSE	topic	correct	TRUE
390	a3656bf8-1809-11e8-b122-44a84224eb5b	1	2	signals12St_BHinge_DBE_1_ShearNormalized_05_window2.png	signals12St_BHinge_Serv_1_ShearNormalized_05_window2.png	signals12St_FiberNomSt_DBE_1_ShearNormalized_05_window2.png	13.18	5	2	1_ShearNormalized	3	TRUE	signal	incorrect	FALSE
391	a3656bf8-1809-11e8-b122-44a84224eb5b	2	2	signals12St_FiberNomSt_MCE_1_ShearNormalized_25_window0.png	signals12St_FiberTapSt_DBE_1_ShearNormalized_25_window0.png	signals12St_FiberConstSt_MCE_1_ShearNormalized_25_window0.png	11.37	25	0	1_ShearNormalized	4	TRUE	signal	correct	TRUE
392	a3656bf8-1809-11e8-b122-44a84224eb5b	1	2	topics5_12St_FiberConstSt_MCE_1_ShearNormalized_44_window0.png	topics5_12St_FiberTapSt_MCE_1_ShearNormalized_44_window0.png	topics5_12St_FiberNomSt_DBE_1_ShearNormalized_44_window0.png	14.6	44	0	1_ShearNormalized	4	FALSE	topic	incorrect	FALSE
393	a3656bf8-1809-11e8-b122-44a84224eb5b	2	1	signals12St_BHinge_DBE_1_ShearNormalized_45_window1.png	signals12St_FiberTapSt_DBE_1_ShearNormalized_45_window1.png	signals12St_BHinge_MCE_1_ShearNormalized_45_window1.png	8.24	45	1	1_ShearNormalized	1	TRUE	signal	incorrect	FALSE
394	a3656bf8-1809-11e8-b122-44a84224eb5b	1	1	topics5_12St_FiberTapSt_MCE_1_ShearNormalized_40_window1.png	topics5_12St_FiberNomSt_MCE_1_ShearNormalized_40_window1.png	topics5_12St_FiberConstSt_DBE_1_ShearNormalized_40_window1.png	7.77	40	1	1_ShearNormalized	4	FALSE	topic	correct	TRUE
395	a3656bf8-1809-11e8-b122-44a84224eb5b	2	2	signals12St_BHinge_DBE_1_ShearNormalized_49_window1.png	signals12St_FiberNomSt_DBE_1_ShearNormalized_49_window1.png	signals12St_BHinge_MCE_1_ShearNormalized_49_window1.png	6.68	49	1	1_ShearNormalized	1	TRUE	signal	correct	TRUE
396	a3656bf8-1809-11e8-b122-44a84224eb5b	2	2	topics5_12St_BHinge_DBE_1_ShearNormalized_05_window2.png	topics5_12St_FiberNomSt_DBE_1_ShearNormalized_05_window2.png	topics5_12St_BHinge_Serv_1_ShearNormalized_05_window2.png	8.66	5	2	1_ShearNormalized	3	FALSE	topic	correct	TRUE
397	a3656bf8-1809-11e8-b122-44a84224eb5b	2	2	signals12St_FiberConstSt_MCE_1_ShearNormalized_49_window1.png	signals12St_FiberTapSt_DBE_1_ShearNormalized_49_window1.png	signals12St_FiberNomSt_MCE_1_ShearNormalized_49_window1.png	14.98	49	1	1_ShearNormalized	4	TRUE	signal	correct	TRUE
398	a3656bf8-1809-11e8-b122-44a84224eb5b	1	1	topics5_12St_BHinge_MCE_1_ShearNormalized_25_window2.png	topics5_12St_BHinge_DBE_1_ShearNormalized_25_window2.png	topics5_12St_FiberNomSt_MCE_1_ShearNormalized_25_window2.png	11.29	25	2	1_ShearNormalized	1	FALSE	topic	correct	TRUE
399	a3656bf8-1809-11e8-b122-44a84224eb5b	1	1	topics5_12St_BHinge_DBE_1_ShearNormalized_49_window1.png	topics5_12St_BHinge_MCE_1_ShearNormalized_49_window1.png	topics5_12St_FiberNomSt_DBE_1_ShearNormalized_49_window1.png	10.4	49	1	1_ShearNormalized	1	FALSE	topic	correct	TRUE
400	a3656bf8-1809-11e8-b122-44a84224eb5b	2	1	signals12St_BHinge_MCE_1_ShearNormalized_08_window0.png	signals12St_FiberConstSt_MCE_1_ShearNormalized_08_window0.png	signals12St_BHinge_DBE_1_ShearNormalized_08_window0.png	10.7	8	0	1_ShearNormalized	1	TRUE	signal	incorrect	FALSE
401	a3656bf8-1809-11e8-b122-44a84224eb5b	2	2	signals12St_BHinge_MCE_1_ShearNormalized_18_window0.png	signals12St_FiberTapSt_MCE_1_ShearNormalized_18_window0.png	signals12St_BHinge_DBE_1_ShearNormalized_18_window0.png	14.24	18	0	1_ShearNormalized	1	TRUE	signal	correct	TRUE
402	a3656bf8-1809-11e8-b122-44a84224eb5b	1	1	topics5_12St_BHinge_MCE_1_ShearNormalized_19_window1.png	topics5_12St_BHinge_MCE_1_ShearNormalized_19_window1.png	topics5_12St_FiberConstSt_MCE_1_ShearNormalized_19_window1.png	6.16	19	1	1_ShearNormalized	0	FALSE	topic	correct	TRUE
403	a3656bf8-1809-11e8-b122-44a84224eb5b	1	1	topics5_12St_BHinge_DBE_1_ShearNormalized_17_window1.png	topics5_12St_BHinge_MCE_1_ShearNormalized_17_window1.png	topics5_12St_FiberNomSt_DBE_1_ShearNormalized_17_window1.png	6.82	17	1	1_ShearNormalized	1	FALSE	topic	correct	TRUE
404	a3656bf8-1809-11e8-b122-44a84224eb5b	2	2	signals12St_BHinge_DBE_1_ShearNormalized_17_window1.png	signals12St_FiberNomSt_DBE_1_ShearNormalized_17_window1.png	signals12St_BHinge_MCE_1_ShearNormalized_17_window1.png	13.51	17	1	1_ShearNormalized	1	TRUE	signal	correct	TRUE
405	a3656bf8-1809-11e8-b122-44a84224eb5b	2	1	signals12St_BHinge_MCE_1_ShearNormalized_25_window2.png	signals12St_FiberNomSt_MCE_1_ShearNormalized_25_window2.png	signals12St_BHinge_DBE_1_ShearNormalized_25_window2.png	14.01	25	2	1_ShearNormalized	1	TRUE	signal	incorrect	FALSE
406	a3656bf8-1809-11e8-b122-44a84224eb5b	1	1	signals12St_FiberConstSt_Serv_1_ShearNormalized_42_window1.png	signals12St_FiberTapSt_Serv_1_ShearNormalized_42_window1.png	signals12St_FiberNomSt_DBE_1_ShearNormalized_42_window1.png	11.95	42	1	1_ShearNormalized	2	TRUE	signal	correct	TRUE
407	a3656bf8-1809-11e8-b122-44a84224eb5b	2	2	signals12St_FiberConstSt_MCE_1_ShearNormalized_08_window2.png	signals12St_FiberTapSt_DBE_1_ShearNormalized_08_window2.png	signals12St_FiberNomSt_MCE_1_ShearNormalized_08_window2.png	9.37	8	2	1_ShearNormalized	4	TRUE	signal	correct	TRUE
408	a3656bf8-1809-11e8-b122-44a84224eb5b	2	2	signals12St_BHinge_MCE_1_ShearNormalized_19_window1.png	signals12St_FiberConstSt_MCE_1_ShearNormalized_19_window1.png	signals12St_BHinge_MCE_1_ShearNormalized_19_window1.png	8.96	19	1	1_ShearNormalized	0	TRUE	signal	correct	TRUE
409	a3656bf8-1809-11e8-b122-44a84224eb5b	2	2	signals12St_BHinge_MCE_1_ShearNormalized_19_window1.png	signals12St_FiberConstSt_MCE_1_ShearNormalized_19_window1.png	signals12St_BHinge_MCE_1_ShearNormalized_19_window1.png	23.61	19	1	1_ShearNormalized	0	TRUE	signal	correct	TRUE
410	a3656bf8-1809-11e8-b122-44a84224eb5b	2	2	signals12St_BHinge_MCE_1_ShearNormalized_19_window1.png	signals12St_FiberConstSt_MCE_1_ShearNormalized_19_window1.png	signals12St_BHinge_MCE_1_ShearNormalized_19_window1.png	16.34	19	1	1_ShearNormalized	0	TRUE	signal	correct	TRUE
411	be5bccf0-1cae-11e8-a74b-44a84224eb5b	1	1	topics5_12St_BHinge_DBE_1_ShearNormalized_05_window0.png	topics5_12St_BHinge_MCE_1_ShearNormalized_05_window0.png	topics5_12St_FiberNomSt_DBE_1_ShearNormalized_05_window0.png	5.2	5	0	1_ShearNormalized	1	FALSE	topic	correct	TRUE
412	be5bccf0-1cae-11e8-a74b-44a84224eb5b	2	2	signals12St_BHinge_DBE_1_ShearNormalized_30_window2.png	signals12St_FiberTapSt_DBE_1_ShearNormalized_30_window2.png	signals12St_BHinge_MCE_1_ShearNormalized_30_window2.png	7.95	30	2	1_ShearNormalized	1	TRUE	signal	correct	TRUE
413	be5bccf0-1cae-11e8-a74b-44a84224eb5b	1	1	topics5_12St_BHinge_DBE_1_ShearNormalized_30_window2.png	topics5_12St_BHinge_MCE_1_ShearNormalized_30_window2.png	topics5_12St_FiberTapSt_DBE_1_ShearNormalized_30_window2.png	6.69	30	2	1_ShearNormalized	1	FALSE	topic	correct	TRUE
414	be5bccf0-1cae-11e8-a74b-44a84224eb5b	2	2	signals12St_BHinge_DBE_1_ShearNormalized_32_window1.png	signals12St_FiberNomSt_DBE_1_ShearNormalized_32_window1.png	signals12St_BHinge_DBE_1_ShearNormalized_32_window1.png	2.98	32	1	1_ShearNormalized	0	TRUE	signal	correct	TRUE
415	be5bccf0-1cae-11e8-a74b-44a84224eb5b	1	2	topics5_12St_FiberConstSt_MCE_1_ShearNormalized_37_window1.png	topics5_12St_FiberNomSt_MCE_1_ShearNormalized_37_window1.png	topics5_12St_FiberTapSt_DBE_1_ShearNormalized_37_window1.png	8.08	37	1	1_ShearNormalized	4	FALSE	topic	incorrect	FALSE
416	be5bccf0-1cae-11e8-a74b-44a84224eb5b	2	2	topics5_12St_BHinge_DBE_1_ShearNormalized_16_window0.png	topics5_12St_FiberConstSt_DBE_1_ShearNormalized_16_window0.png	topics5_12St_BHinge_Serv_1_ShearNormalized_16_window0.png	10.47	16	0	1_ShearNormalized	3	FALSE	topic	correct	TRUE
417	be5bccf0-1cae-11e8-a74b-44a84224eb5b	2	2	topics5_12St_FiberNomSt_Serv_1_ShearNormalized_33_window1.png	topics5_12St_FiberConstSt_MCE_1_ShearNormalized_33_window1.png	topics5_12St_FiberTapSt_Serv_1_ShearNormalized_33_window1.png	2.6	33	1	1_ShearNormalized	2	FALSE	topic	correct	TRUE
418	be5bccf0-1cae-11e8-a74b-44a84224eb5b	1	1	signals12St_FiberTapSt_Serv_1_ShearNormalized_42_window0.png	signals12St_FiberConstSt_Serv_1_ShearNormalized_42_window0.png	signals12St_FiberNomSt_MCE_1_ShearNormalized_42_window0.png	2.75	42	0	1_ShearNormalized	2	TRUE	signal	correct	TRUE
419	be5bccf0-1cae-11e8-a74b-44a84224eb5b	1	1	topics5_12St_FiberTapSt_MCE_1_ShearNormalized_15_window1.png	topics5_12St_FiberNomSt_MCE_1_ShearNormalized_15_window1.png	topics5_12St_FiberConstSt_DBE_1_ShearNormalized_15_window1.png	8.18	15	1	1_ShearNormalized	4	FALSE	topic	correct	TRUE
420	be5bccf0-1cae-11e8-a74b-44a84224eb5b	1	1	topics5_12St_BHinge_DBE_1_ShearNormalized_32_window1.png	topics5_12St_BHinge_DBE_1_ShearNormalized_32_window1.png	topics5_12St_FiberNomSt_DBE_1_ShearNormalized_32_window1.png	6.23	32	1	1_ShearNormalized	0	FALSE	topic	correct	TRUE
421	be5bccf0-1cae-11e8-a74b-44a84224eb5b	1	1	signals12St_BHinge_DBE_1_ShearNormalized_16_window0.png	signals12St_BHinge_Serv_1_ShearNormalized_16_window0.png	signals12St_FiberConstSt_DBE_1_ShearNormalized_16_window0.png	12.85	16	0	1_ShearNormalized	3	TRUE	signal	correct	TRUE
422	be5bccf0-1cae-11e8-a74b-44a84224eb5b	2	2	signals12St_BHinge_DBE_1_ShearNormalized_20_window2.png	signals12St_FiberConstSt_DBE_1_ShearNormalized_20_window2.png	signals12St_BHinge_MCE_1_ShearNormalized_20_window2.png	9.26	20	2	1_ShearNormalized	1	TRUE	signal	correct	TRUE
423	be5bccf0-1cae-11e8-a74b-44a84224eb5b	1	1	topics5_12St_BHinge_DBE_1_ShearNormalized_21_window2.png	topics5_12St_BHinge_MCE_1_ShearNormalized_21_window2.png	topics5_12St_FiberConstSt_DBE_1_ShearNormalized_21_window2.png	10.17	21	2	1_ShearNormalized	1	FALSE	topic	correct	TRUE
424	be5bccf0-1cae-11e8-a74b-44a84224eb5b	1	1	topics5_12St_BHinge_DBE_1_ShearNormalized_20_window2.png	topics5_12St_BHinge_MCE_1_ShearNormalized_20_window2.png	topics5_12St_FiberConstSt_DBE_1_ShearNormalized_20_window2.png	2.08	20	2	1_ShearNormalized	1	FALSE	topic	correct	TRUE
425	be5bccf0-1cae-11e8-a74b-44a84224eb5b	1	1	topics5_12St_BHinge_MCE_1_ShearNormalized_17_window1.png	topics5_12St_BHinge_MCE_1_ShearNormalized_17_window1.png	topics5_12St_FiberTapSt_MCE_1_ShearNormalized_17_window1.png	3.59	17	1	1_ShearNormalized	0	FALSE	topic	correct	TRUE
426	be5bccf0-1cae-11e8-a74b-44a84224eb5b	1	1	signals12St_FiberNomSt_Serv_1_ShearNormalized_33_window1.png	signals12St_FiberTapSt_Serv_1_ShearNormalized_33_window1.png	signals12St_FiberConstSt_MCE_1_ShearNormalized_33_window1.png	2.05	33	1	1_ShearNormalized	2	TRUE	signal	correct	TRUE
427	be5bccf0-1cae-11e8-a74b-44a84224eb5b	1	1	signals12St_FiberConstSt_Serv_1_ShearNormalized_25_window0.png	signals12St_FiberNomSt_Serv_1_ShearNormalized_25_window0.png	signals12St_FiberTapSt_MCE_1_ShearNormalized_25_window0.png	4.63	25	0	1_ShearNormalized	2	TRUE	signal	correct	TRUE
428	be5bccf0-1cae-11e8-a74b-44a84224eb5b	2	1	signals12St_BHinge_DBE_1_ShearNormalized_21_window2.png	signals12St_FiberConstSt_DBE_1_ShearNormalized_21_window2.png	signals12St_BHinge_MCE_1_ShearNormalized_21_window2.png	5.81	21	2	1_ShearNormalized	1	TRUE	signal	incorrect	FALSE
429	be5bccf0-1cae-11e8-a74b-44a84224eb5b	2	2	signals12St_BHinge_MCE_1_ShearNormalized_49_window0.png	signals12St_FiberConstSt_MCE_1_ShearNormalized_49_window0.png	signals12St_BHinge_DBE_1_ShearNormalized_49_window0.png	8.58	49	0	1_ShearNormalized	1	TRUE	signal	correct	TRUE
430	be5bccf0-1cae-11e8-a74b-44a84224eb5b	2	2	topics5_12St_BHinge_Serv_1_ShearNormalized_47_window1.png	topics5_12St_FiberTapSt_Serv_1_ShearNormalized_47_window1.png	topics5_12St_BHinge_MCE_1_ShearNormalized_47_window1.png	4.73	47	1	1_ShearNormalized	3	FALSE	topic	correct	TRUE
431	be5bccf0-1cae-11e8-a74b-44a84224eb5b	2	1	signals12St_FiberTapSt_MCE_1_ShearNormalized_15_window1.png	signals12St_FiberConstSt_DBE_1_ShearNormalized_15_window1.png	signals12St_FiberNomSt_MCE_1_ShearNormalized_15_window1.png	8.85	15	1	1_ShearNormalized	4	TRUE	signal	incorrect	FALSE
432	be5bccf0-1cae-11e8-a74b-44a84224eb5b	2	2	topics5_12St_FiberConstSt_Serv_1_ShearNormalized_20_window0.png	topics5_12St_FiberTapSt_MCE_1_ShearNormalized_20_window0.png	topics5_12St_FiberNomSt_Serv_1_ShearNormalized_20_window0.png	3.44	20	0	1_ShearNormalized	2	FALSE	topic	correct	TRUE
433	be5bccf0-1cae-11e8-a74b-44a84224eb5b	1	1	topics5_12St_BHinge_MCE_1_ShearNormalized_47_window1.png	topics5_12St_BHinge_DBE_1_ShearNormalized_47_window1.png	topics5_12St_FiberConstSt_MCE_1_ShearNormalized_47_window1.png	6.3	47	1	1_ShearNormalized	1	FALSE	topic	correct	TRUE
434	be5bccf0-1cae-11e8-a74b-44a84224eb5b	1	1	topics5_12St_BHinge_MCE_1_ShearNormalized_49_window0.png	topics5_12St_BHinge_DBE_1_ShearNormalized_49_window0.png	topics5_12St_FiberConstSt_MCE_1_ShearNormalized_49_window0.png	3.16	49	0	1_ShearNormalized	1	FALSE	topic	correct	TRUE
435	be5bccf0-1cae-11e8-a74b-44a84224eb5b	1	1	signals12St_BHinge_Serv_1_ShearNormalized_46_window0.png	signals12St_BHinge_DBE_1_ShearNormalized_46_window0.png	signals12St_FiberTapSt_Serv_1_ShearNormalized_46_window0.png	5.31	46	0	1_ShearNormalized	3	TRUE	signal	correct	TRUE
436	be5bccf0-1cae-11e8-a74b-44a84224eb5b	2	2	signals12St_BHinge_DBE_1_ShearNormalized_05_window0.png	signals12St_FiberNomSt_DBE_1_ShearNormalized_05_window0.png	signals12St_BHinge_MCE_1_ShearNormalized_05_window0.png	3.88	5	0	1_ShearNormalized	1	TRUE	signal	correct	TRUE
437	be5bccf0-1cae-11e8-a74b-44a84224eb5b	1	1	signals12St_FiberConstSt_Serv_1_ShearNormalized_20_window0.png	signals12St_FiberNomSt_Serv_1_ShearNormalized_20_window0.png	signals12St_FiberTapSt_MCE_1_ShearNormalized_20_window0.png	1.88	20	0	1_ShearNormalized	2	TRUE	signal	correct	TRUE
438	be5bccf0-1cae-11e8-a74b-44a84224eb5b	2	2	signals12St_FiberConstSt_MCE_1_ShearNormalized_37_window1.png	signals12St_FiberTapSt_DBE_1_ShearNormalized_37_window1.png	signals12St_FiberNomSt_MCE_1_ShearNormalized_37_window1.png	8.12	37	1	1_ShearNormalized	4	TRUE	signal	correct	TRUE
439	be5bccf0-1cae-11e8-a74b-44a84224eb5b	2	2	topics5_12St_BHinge_Serv_1_ShearNormalized_46_window0.png	topics5_12St_FiberTapSt_Serv_1_ShearNormalized_46_window0.png	topics5_12St_BHinge_DBE_1_ShearNormalized_46_window0.png	4.47	46	0	1_ShearNormalized	3	FALSE	topic	correct	TRUE
440	be5bccf0-1cae-11e8-a74b-44a84224eb5b	2	2	topics5_12St_FiberTapSt_Serv_1_ShearNormalized_42_window0.png	topics5_12St_FiberNomSt_MCE_1_ShearNormalized_42_window0.png	topics5_12St_FiberConstSt_Serv_1_ShearNormalized_42_window0.png	2.78	42	0	1_ShearNormalized	2	FALSE	topic	correct	TRUE
441	be5bccf0-1cae-11e8-a74b-44a84224eb5b	2	2	topics5_12St_FiberConstSt_Serv_1_ShearNormalized_25_window0.png	topics5_12St_FiberTapSt_MCE_1_ShearNormalized_25_window0.png	topics5_12St_FiberNomSt_Serv_1_ShearNormalized_25_window0.png	4.23	25	0	1_ShearNormalized	2	FALSE	topic	correct	TRUE
442	be5bccf0-1cae-11e8-a74b-44a84224eb5b	1	2	signals12St_BHinge_Serv_1_ShearNormalized_47_window1.png	signals12St_BHinge_MCE_1_ShearNormalized_47_window1.png	signals12St_FiberTapSt_Serv_1_ShearNormalized_47_window1.png	6.09	47	1	1_ShearNormalized	3	TRUE	signal	incorrect	FALSE
443	be5bccf0-1cae-11e8-a74b-44a84224eb5b	2	2	signals12St_BHinge_MCE_1_ShearNormalized_47_window1.png	signals12St_FiberConstSt_MCE_1_ShearNormalized_47_window1.png	signals12St_BHinge_DBE_1_ShearNormalized_47_window1.png	5.11	47	1	1_ShearNormalized	1	TRUE	signal	correct	TRUE
444	be5bccf0-1cae-11e8-a74b-44a84224eb5b	2	2	signals12St_BHinge_MCE_1_ShearNormalized_17_window1.png	signals12St_FiberTapSt_MCE_1_ShearNormalized_17_window1.png	signals12St_BHinge_MCE_1_ShearNormalized_17_window1.png	6.16	17	1	1_ShearNormalized	0	TRUE	signal	correct	TRUE
445	c8d58c32-1c83-11e8-a74b-44a84224eb5b	2	2	signals12St_FiberConstSt_MCE_1_ShearNormalized_29_window2.png	signals12St_FiberTapSt_DBE_1_ShearNormalized_29_window2.png	signals12St_FiberNomSt_MCE_1_ShearNormalized_29_window2.png	2.4	29	2	1_ShearNormalized	4	TRUE	signal	correct	TRUE
446	c8d58c32-1c83-11e8-a74b-44a84224eb5b	1	1	signals12St_FiberConstSt_Serv_1_ShearNormalized_35_window1.png	signals12St_FiberNomSt_Serv_1_ShearNormalized_35_window1.png	signals12St_FiberTapSt_MCE_1_ShearNormalized_35_window1.png	1.51	35	1	1_ShearNormalized	2	TRUE	signal	correct	TRUE
447	c8d58c32-1c83-11e8-a74b-44a84224eb5b	1	1	signals12St_FiberTapSt_Serv_1_ShearNormalized_08_window2.png	signals12St_FiberConstSt_Serv_1_ShearNormalized_08_window2.png	signals12St_FiberNomSt_DBE_1_ShearNormalized_08_window2.png	1.38	8	2	1_ShearNormalized	2	TRUE	signal	correct	TRUE
448	c8d58c32-1c83-11e8-a74b-44a84224eb5b	1	1	topics5_12St_BHinge_MCE_1_ShearNormalized_07_window0.png	topics5_12St_BHinge_DBE_1_ShearNormalized_07_window0.png	topics5_12St_FiberNomSt_MCE_1_ShearNormalized_07_window0.png	1.3	7	0	1_ShearNormalized	1	FALSE	topic	correct	TRUE
449	c8d58c32-1c83-11e8-a74b-44a84224eb5b	1	1	topics5_12St_FiberConstSt_MCE_1_ShearNormalized_02_window2.png	topics5_12St_FiberTapSt_MCE_1_ShearNormalized_02_window2.png	topics5_12St_FiberNomSt_DBE_1_ShearNormalized_02_window2.png	1.96	2	2	1_ShearNormalized	4	FALSE	topic	correct	TRUE
450	c8d58c32-1c83-11e8-a74b-44a84224eb5b	2	2	topics5_12St_FiberNomSt_Serv_1_ShearNormalized_10_window0.png	topics5_12St_FiberTapSt_DBE_1_ShearNormalized_10_window0.png	topics5_12St_FiberConstSt_Serv_1_ShearNormalized_10_window0.png	3.01	10	0	1_ShearNormalized	2	FALSE	topic	correct	TRUE
451	c8d58c32-1c83-11e8-a74b-44a84224eb5b	1	1	signals12St_FiberNomSt_Serv_1_ShearNormalized_27_window2.png	signals12St_FiberTapSt_Serv_1_ShearNormalized_27_window2.png	signals12St_FiberConstSt_MCE_1_ShearNormalized_27_window2.png	2.43	27	2	1_ShearNormalized	2	TRUE	signal	correct	TRUE
452	c8d58c32-1c83-11e8-a74b-44a84224eb5b	2	2	signals12St_FiberConstSt_MCE_1_ShearNormalized_02_window2.png	signals12St_FiberNomSt_DBE_1_ShearNormalized_02_window2.png	signals12St_FiberTapSt_MCE_1_ShearNormalized_02_window2.png	1.93	2	2	1_ShearNormalized	4	TRUE	signal	correct	TRUE
453	c8d58c32-1c83-11e8-a74b-44a84224eb5b	2	2	signals12St_BHinge_MCE_1_ShearNormalized_41_window1.png	signals12St_FiberTapSt_MCE_1_ShearNormalized_41_window1.png	signals12St_BHinge_MCE_1_ShearNormalized_41_window1.png	1.17	41	1	1_ShearNormalized	0	TRUE	signal	correct	TRUE
454	c8d58c32-1c83-11e8-a74b-44a84224eb5b	1	2	signals12St_BHinge_MCE_1_ShearNormalized_18_window1.png	signals12St_BHinge_Serv_1_ShearNormalized_18_window1.png	signals12St_FiberTapSt_MCE_1_ShearNormalized_18_window1.png	2.46	18	1	1_ShearNormalized	3	TRUE	signal	incorrect	FALSE
455	c8d58c32-1c83-11e8-a74b-44a84224eb5b	1	2	signals12St_BHinge_DBE_1_ShearNormalized_50_window1.png	signals12St_BHinge_Serv_1_ShearNormalized_50_window1.png	signals12St_FiberConstSt_DBE_1_ShearNormalized_50_window1.png	1.6	50	1	1_ShearNormalized	3	TRUE	signal	incorrect	FALSE
456	c8d58c32-1c83-11e8-a74b-44a84224eb5b	2	2	signals12St_BHinge_MCE_1_ShearNormalized_07_window0.png	signals12St_FiberNomSt_MCE_1_ShearNormalized_07_window0.png	signals12St_BHinge_DBE_1_ShearNormalized_07_window0.png	4.04	7	0	1_ShearNormalized	1	TRUE	signal	correct	TRUE
457	c8d58c32-1c83-11e8-a74b-44a84224eb5b	2	2	topics5_12St_BHinge_Serv_1_ShearNormalized_28_window1.png	topics5_12St_FiberConstSt_Serv_1_ShearNormalized_28_window1.png	topics5_12St_BHinge_DBE_1_ShearNormalized_28_window1.png	2.16	28	1	1_ShearNormalized	3	FALSE	topic	correct	TRUE
458	c8d58c32-1c83-11e8-a74b-44a84224eb5b	1	1	signals12St_FiberNomSt_Serv_1_ShearNormalized_10_window0.png	signals12St_FiberConstSt_Serv_1_ShearNormalized_10_window0.png	signals12St_FiberTapSt_DBE_1_ShearNormalized_10_window0.png	1.79	10	0	1_ShearNormalized	2	TRUE	signal	correct	TRUE
459	c8d58c32-1c83-11e8-a74b-44a84224eb5b	2	2	signals12St_BHinge_MCE_1_ShearNormalized_46_window2.png	signals12St_FiberTapSt_MCE_1_ShearNormalized_46_window2.png	signals12St_BHinge_MCE_1_ShearNormalized_46_window2.png	4.76	46	2	1_ShearNormalized	0	TRUE	signal	correct	TRUE
460	c8d58c32-1c83-11e8-a74b-44a84224eb5b	1	2	topics5_12St_FiberConstSt_MCE_1_ShearNormalized_29_window2.png	topics5_12St_FiberNomSt_MCE_1_ShearNormalized_29_window2.png	topics5_12St_FiberTapSt_DBE_1_ShearNormalized_29_window2.png	5.68	29	2	1_ShearNormalized	4	FALSE	topic	incorrect	FALSE
461	c8d58c32-1c83-11e8-a74b-44a84224eb5b	2	2	topics5_12St_FiberConstSt_Serv_1_ShearNormalized_35_window1.png	topics5_12St_FiberTapSt_MCE_1_ShearNormalized_35_window1.png	topics5_12St_FiberNomSt_Serv_1_ShearNormalized_35_window1.png	1.45	35	1	1_ShearNormalized	2	FALSE	topic	correct	TRUE
462	c8d58c32-1c83-11e8-a74b-44a84224eb5b	1	1	signals12St_FiberConstSt_Serv_1_ShearNormalized_04_window2.png	signals12St_FiberTapSt_Serv_1_ShearNormalized_04_window2.png	signals12St_FiberNomSt_MCE_1_ShearNormalized_04_window2.png	3.49	4	2	1_ShearNormalized	2	TRUE	signal	correct	TRUE
463	c8d58c32-1c83-11e8-a74b-44a84224eb5b	1	1	topics5_12St_BHinge_DBE_1_ShearNormalized_36_window1.png	topics5_12St_BHinge_MCE_1_ShearNormalized_36_window1.png	topics5_12St_FiberTapSt_DBE_1_ShearNormalized_36_window1.png	2.28	36	1	1_ShearNormalized	1	FALSE	topic	correct	TRUE
464	c8d58c32-1c83-11e8-a74b-44a84224eb5b	1	1	topics5_12St_BHinge_MCE_1_ShearNormalized_41_window1.png	topics5_12St_BHinge_MCE_1_ShearNormalized_41_window1.png	topics5_12St_FiberTapSt_MCE_1_ShearNormalized_41_window1.png	1.48	41	1	1_ShearNormalized	0	FALSE	topic	correct	TRUE
465	c8d58c32-1c83-11e8-a74b-44a84224eb5b	2	2	topics5_12St_FiberConstSt_Serv_1_ShearNormalized_04_window2.png	topics5_12St_FiberNomSt_MCE_1_ShearNormalized_04_window2.png	topics5_12St_FiberTapSt_Serv_1_ShearNormalized_04_window2.png	4.9	4	2	1_ShearNormalized	2	FALSE	topic	correct	TRUE
466	c8d58c32-1c83-11e8-a74b-44a84224eb5b	1	1	signals12St_FiberConstSt_Serv_1_ShearNormalized_02_window0.png	signals12St_FiberNomSt_Serv_1_ShearNormalized_02_window0.png	signals12St_FiberTapSt_DBE_1_ShearNormalized_02_window0.png	2.85	2	0	1_ShearNormalized	2	TRUE	signal	correct	TRUE
467	c8d58c32-1c83-11e8-a74b-44a84224eb5b	2	2	topics5_12St_FiberConstSt_Serv_1_ShearNormalized_02_window0.png	topics5_12St_FiberTapSt_DBE_1_ShearNormalized_02_window0.png	topics5_12St_FiberNomSt_Serv_1_ShearNormalized_02_window0.png	3.67	2	0	1_ShearNormalized	2	FALSE	topic	correct	TRUE
468	c8d58c32-1c83-11e8-a74b-44a84224eb5b	1	2	signals12St_BHinge_MCE_1_ShearNormalized_13_window0.png	signals12St_BHinge_Serv_1_ShearNormalized_13_window0.png	signals12St_FiberNomSt_MCE_1_ShearNormalized_13_window0.png	2.09	13	0	1_ShearNormalized	3	TRUE	signal	incorrect	FALSE
469	c8d58c32-1c83-11e8-a74b-44a84224eb5b	2	2	topics5_12St_FiberTapSt_Serv_1_ShearNormalized_08_window2.png	topics5_12St_FiberNomSt_DBE_1_ShearNormalized_08_window2.png	topics5_12St_FiberConstSt_Serv_1_ShearNormalized_08_window2.png	1.23	8	2	1_ShearNormalized	2	FALSE	topic	correct	TRUE
470	c8d58c32-1c83-11e8-a74b-44a84224eb5b	1	2	signals12St_BHinge_Serv_1_ShearNormalized_28_window1.png	signals12St_BHinge_DBE_1_ShearNormalized_28_window1.png	signals12St_FiberConstSt_Serv_1_ShearNormalized_28_window1.png	6.13	28	1	1_ShearNormalized	3	TRUE	signal	incorrect	FALSE
471	c8d58c32-1c83-11e8-a74b-44a84224eb5b	2	2	topics5_12St_BHinge_DBE_1_ShearNormalized_50_window1.png	topics5_12St_FiberConstSt_DBE_1_ShearNormalized_50_window1.png	topics5_12St_BHinge_Serv_1_ShearNormalized_50_window1.png	7.55	50	1	1_ShearNormalized	3	FALSE	topic	correct	TRUE
472	c8d58c32-1c83-11e8-a74b-44a84224eb5b	2	2	signals12St_BHinge_DBE_1_ShearNormalized_36_window1.png	signals12St_FiberTapSt_DBE_1_ShearNormalized_36_window1.png	signals12St_BHinge_MCE_1_ShearNormalized_36_window1.png	1.31	36	1	1_ShearNormalized	1	TRUE	signal	correct	TRUE
473	c8d58c32-1c83-11e8-a74b-44a84224eb5b	2	2	topics5_12St_BHinge_MCE_1_ShearNormalized_13_window0.png	topics5_12St_FiberNomSt_MCE_1_ShearNormalized_13_window0.png	topics5_12St_BHinge_Serv_1_ShearNormalized_13_window0.png	3.4	13	0	1_ShearNormalized	3	FALSE	topic	correct	TRUE
474	c8d58c32-1c83-11e8-a74b-44a84224eb5b	1	1	topics5_12St_FiberNomSt_MCE_1_ShearNormalized_34_window1.png	topics5_12St_FiberTapSt_MCE_1_ShearNormalized_34_window1.png	topics5_12St_FiberConstSt_DBE_1_ShearNormalized_34_window1.png	2.77	34	1	1_ShearNormalized	4	FALSE	topic	correct	TRUE
475	c8d58c32-1c83-11e8-a74b-44a84224eb5b	2	2	signals12St_FiberNomSt_MCE_1_ShearNormalized_34_window1.png	signals12St_FiberConstSt_DBE_1_ShearNormalized_34_window1.png	signals12St_FiberTapSt_MCE_1_ShearNormalized_34_window1.png	2.34	34	1	1_ShearNormalized	4	TRUE	signal	correct	TRUE
476	c8d58c32-1c83-11e8-a74b-44a84224eb5b	2	1	topics5_12St_BHinge_MCE_1_ShearNormalized_18_window1.png	topics5_12St_FiberTapSt_MCE_1_ShearNormalized_18_window1.png	topics5_12St_BHinge_Serv_1_ShearNormalized_18_window1.png	8.71	18	1	1_ShearNormalized	3	FALSE	topic	incorrect	FALSE
477	c8d58c32-1c83-11e8-a74b-44a84224eb5b	2	2	topics5_12St_FiberNomSt_Serv_1_ShearNormalized_27_window2.png	topics5_12St_FiberConstSt_MCE_1_ShearNormalized_27_window2.png	topics5_12St_FiberTapSt_Serv_1_ShearNormalized_27_window2.png	1.51	27	2	1_ShearNormalized	2	FALSE	topic	correct	TRUE
478	c8d58c32-1c83-11e8-a74b-44a84224eb5b	1	1	topics5_12St_BHinge_MCE_1_ShearNormalized_46_window2.png	topics5_12St_BHinge_MCE_1_ShearNormalized_46_window2.png	topics5_12St_FiberTapSt_MCE_1_ShearNormalized_46_window2.png	2	46	2	1_ShearNormalized	0	FALSE	topic	correct	TRUE
479	cac97d06-17ff-11e8-b122-44a84224eb5b	2	1	signals12St_FiberNomSt_MCE_1_ShearNormalized_31_window2.png	signals12St_FiberTapSt_DBE_1_ShearNormalized_31_window2.png	signals12St_FiberConstSt_MCE_1_ShearNormalized_31_window2.png	4.54	31	2	1_ShearNormalized	4	TRUE	signal	incorrect	FALSE
480	cac97d06-17ff-11e8-b122-44a84224eb5b	1	1	topics5_12St_BHinge_DBE_1_ShearNormalized_26_window0.png	topics5_12St_BHinge_DBE_1_ShearNormalized_26_window0.png	topics5_12St_FiberConstSt_DBE_1_ShearNormalized_26_window0.png	2.02	26	0	1_ShearNormalized	0	FALSE	topic	correct	TRUE
481	cac97d06-17ff-11e8-b122-44a84224eb5b	1	1	signals12St_FiberTapSt_Serv_1_ShearNormalized_18_window2.png	signals12St_FiberNomSt_Serv_1_ShearNormalized_18_window2.png	signals12St_FiberConstSt_MCE_1_ShearNormalized_18_window2.png	2.11	18	2	1_ShearNormalized	2	TRUE	signal	correct	TRUE
482	cac97d06-17ff-11e8-b122-44a84224eb5b	1	2	signals12St_BHinge_DBE_1_ShearNormalized_17_window0.png	signals12St_BHinge_Serv_1_ShearNormalized_17_window0.png	signals12St_FiberConstSt_DBE_1_ShearNormalized_17_window0.png	7.02	17	0	1_ShearNormalized	3	TRUE	signal	incorrect	FALSE
483	cac97d06-17ff-11e8-b122-44a84224eb5b	2	2	signals12St_BHinge_DBE_1_ShearNormalized_06_window0.png	signals12St_FiberTapSt_DBE_1_ShearNormalized_06_window0.png	signals12St_BHinge_MCE_1_ShearNormalized_06_window0.png	2.72	6	0	1_ShearNormalized	1	TRUE	signal	correct	TRUE
484	cac97d06-17ff-11e8-b122-44a84224eb5b	2	2	signals12St_FiberConstSt_MCE_1_ShearNormalized_30_window2.png	signals12St_FiberNomSt_DBE_1_ShearNormalized_30_window2.png	signals12St_FiberTapSt_MCE_1_ShearNormalized_30_window2.png	2.69	30	2	1_ShearNormalized	4	TRUE	signal	correct	TRUE
485	cac97d06-17ff-11e8-b122-44a84224eb5b	1	1	signals12St_FiberConstSt_Serv_1_ShearNormalized_06_window1.png	signals12St_FiberNomSt_Serv_1_ShearNormalized_06_window1.png	signals12St_FiberTapSt_DBE_1_ShearNormalized_06_window1.png	2.91	6	1	1_ShearNormalized	2	TRUE	signal	correct	TRUE
486	cac97d06-17ff-11e8-b122-44a84224eb5b	2	2	topics5_12St_FiberTapSt_Serv_1_ShearNormalized_39_window0.png	topics5_12St_FiberNomSt_DBE_1_ShearNormalized_39_window0.png	topics5_12St_FiberConstSt_Serv_1_ShearNormalized_39_window0.png	3.45	39	0	1_ShearNormalized	2	FALSE	topic	correct	TRUE
487	cac97d06-17ff-11e8-b122-44a84224eb5b	2	2	signals12St_BHinge_MCE_1_ShearNormalized_12_window2.png	signals12St_FiberNomSt_MCE_1_ShearNormalized_12_window2.png	signals12St_BHinge_DBE_1_ShearNormalized_12_window2.png	3.99	12	2	1_ShearNormalized	1	TRUE	signal	correct	TRUE
488	cac97d06-17ff-11e8-b122-44a84224eb5b	1	1	topics5_12St_FiberTapSt_MCE_1_ShearNormalized_17_window0.png	topics5_12St_FiberNomSt_MCE_1_ShearNormalized_17_window0.png	topics5_12St_FiberConstSt_DBE_1_ShearNormalized_17_window0.png	8.98	17	0	1_ShearNormalized	4	FALSE	topic	correct	TRUE
489	cac97d06-17ff-11e8-b122-44a84224eb5b	1	1	signals12St_FiberConstSt_Serv_1_ShearNormalized_11_window2.png	signals12St_FiberTapSt_Serv_1_ShearNormalized_11_window2.png	signals12St_FiberNomSt_DBE_1_ShearNormalized_11_window2.png	3.95	11	2	1_ShearNormalized	2	TRUE	signal	correct	TRUE
490	cac97d06-17ff-11e8-b122-44a84224eb5b	1	1	topics5_12St_FiberNomSt_MCE_1_ShearNormalized_31_window2.png	topics5_12St_FiberConstSt_MCE_1_ShearNormalized_31_window2.png	topics5_12St_FiberTapSt_DBE_1_ShearNormalized_31_window2.png	10.45	31	2	1_ShearNormalized	4	FALSE	topic	correct	TRUE
491	cac97d06-17ff-11e8-b122-44a84224eb5b	1	1	topics5_12St_BHinge_MCE_1_ShearNormalized_50_window2.png	topics5_12St_BHinge_MCE_1_ShearNormalized_50_window2.png	topics5_12St_FiberNomSt_MCE_1_ShearNormalized_50_window2.png	2.24	50	2	1_ShearNormalized	0	FALSE	topic	correct	TRUE
492	cac97d06-17ff-11e8-b122-44a84224eb5b	2	2	topics5_12St_FiberConstSt_Serv_1_ShearNormalized_06_window1.png	topics5_12St_FiberTapSt_DBE_1_ShearNormalized_06_window1.png	topics5_12St_FiberNomSt_Serv_1_ShearNormalized_06_window1.png	1.45	6	1	1_ShearNormalized	2	FALSE	topic	correct	TRUE
493	cac97d06-17ff-11e8-b122-44a84224eb5b	1	1	signals12St_FiberNomSt_Serv_1_ShearNormalized_04_window1.png	signals12St_FiberTapSt_Serv_1_ShearNormalized_04_window1.png	signals12St_FiberConstSt_MCE_1_ShearNormalized_04_window1.png	2.64	4	1	1_ShearNormalized	2	TRUE	signal	correct	TRUE
494	cac97d06-17ff-11e8-b122-44a84224eb5b	2	2	signals12St_FiberNomSt_MCE_1_ShearNormalized_31_window2.png	signals12St_FiberTapSt_DBE_1_ShearNormalized_31_window2.png	signals12St_FiberConstSt_MCE_1_ShearNormalized_31_window2.png	6.09	31	2	1_ShearNormalized	4	TRUE	signal	correct	TRUE
495	cac97d06-17ff-11e8-b122-44a84224eb5b	2	2	signals12St_BHinge_DBE_1_ShearNormalized_13_window2.png	signals12St_FiberConstSt_DBE_1_ShearNormalized_13_window2.png	signals12St_BHinge_MCE_1_ShearNormalized_13_window2.png	5.71	13	2	1_ShearNormalized	1	TRUE	signal	correct	TRUE
496	cac97d06-17ff-11e8-b122-44a84224eb5b	2	2	topics5_12St_FiberNomSt_Serv_1_ShearNormalized_04_window1.png	topics5_12St_FiberConstSt_MCE_1_ShearNormalized_04_window1.png	topics5_12St_FiberTapSt_Serv_1_ShearNormalized_04_window1.png	1.38	4	1	1_ShearNormalized	2	FALSE	topic	correct	TRUE
497	cac97d06-17ff-11e8-b122-44a84224eb5b	2	2	signals12St_BHinge_MCE_1_ShearNormalized_50_window2.png	signals12St_FiberNomSt_MCE_1_ShearNormalized_50_window2.png	signals12St_BHinge_MCE_1_ShearNormalized_50_window2.png	2.43	50	2	1_ShearNormalized	0	TRUE	signal	correct	TRUE
498	cac97d06-17ff-11e8-b122-44a84224eb5b	1	1	signals12St_FiberNomSt_Serv_1_ShearNormalized_15_window0.png	signals12St_FiberConstSt_Serv_1_ShearNormalized_15_window0.png	signals12St_FiberTapSt_DBE_1_ShearNormalized_15_window0.png	2.43	15	0	1_ShearNormalized	2	TRUE	signal	correct	TRUE
499	cac97d06-17ff-11e8-b122-44a84224eb5b	2	2	topics5_12St_FiberNomSt_Serv_1_ShearNormalized_15_window0.png	topics5_12St_FiberTapSt_DBE_1_ShearNormalized_15_window0.png	topics5_12St_FiberConstSt_Serv_1_ShearNormalized_15_window0.png	2.15	15	0	1_ShearNormalized	2	FALSE	topic	correct	TRUE
500	cac97d06-17ff-11e8-b122-44a84224eb5b	2	2	signals12St_FiberTapSt_MCE_1_ShearNormalized_17_window0.png	signals12St_FiberConstSt_DBE_1_ShearNormalized_17_window0.png	signals12St_FiberNomSt_MCE_1_ShearNormalized_17_window0.png	3.15	17	0	1_ShearNormalized	4	TRUE	signal	correct	TRUE
501	cac97d06-17ff-11e8-b122-44a84224eb5b	2	2	topics5_12St_FiberTapSt_Serv_1_ShearNormalized_30_window0.png	topics5_12St_FiberNomSt_DBE_1_ShearNormalized_30_window0.png	topics5_12St_FiberConstSt_Serv_1_ShearNormalized_30_window0.png	6.16	30	0	1_ShearNormalized	2	FALSE	topic	correct	TRUE
502	cac97d06-17ff-11e8-b122-44a84224eb5b	1	1	topics5_12St_FiberConstSt_MCE_1_ShearNormalized_30_window2.png	topics5_12St_FiberTapSt_MCE_1_ShearNormalized_30_window2.png	topics5_12St_FiberNomSt_DBE_1_ShearNormalized_30_window2.png	2.73	30	2	1_ShearNormalized	4	FALSE	topic	correct	TRUE
503	cac97d06-17ff-11e8-b122-44a84224eb5b	2	2	signals12St_BHinge_DBE_1_ShearNormalized_26_window0.png	signals12St_FiberConstSt_DBE_1_ShearNormalized_26_window0.png	signals12St_BHinge_DBE_1_ShearNormalized_26_window0.png	3.93	26	0	1_ShearNormalized	0	TRUE	signal	correct	TRUE
504	cac97d06-17ff-11e8-b122-44a84224eb5b	1	1	topics5_12St_BHinge_DBE_1_ShearNormalized_06_window0.png	topics5_12St_BHinge_MCE_1_ShearNormalized_06_window0.png	topics5_12St_FiberTapSt_DBE_1_ShearNormalized_06_window0.png	5.8	6	0	1_ShearNormalized	1	FALSE	topic	correct	TRUE
505	cac97d06-17ff-11e8-b122-44a84224eb5b	1	1	topics5_12St_BHinge_MCE_1_ShearNormalized_12_window2.png	topics5_12St_BHinge_DBE_1_ShearNormalized_12_window2.png	topics5_12St_FiberNomSt_MCE_1_ShearNormalized_12_window2.png	3.61	12	2	1_ShearNormalized	1	FALSE	topic	correct	TRUE
506	cac97d06-17ff-11e8-b122-44a84224eb5b	1	1	signals12St_FiberTapSt_Serv_1_ShearNormalized_30_window0.png	signals12St_FiberConstSt_Serv_1_ShearNormalized_30_window0.png	signals12St_FiberNomSt_DBE_1_ShearNormalized_30_window0.png	3.2	30	0	1_ShearNormalized	2	TRUE	signal	correct	TRUE
507	cac97d06-17ff-11e8-b122-44a84224eb5b	1	1	signals12St_FiberTapSt_Serv_1_ShearNormalized_39_window0.png	signals12St_FiberConstSt_Serv_1_ShearNormalized_39_window0.png	signals12St_FiberNomSt_DBE_1_ShearNormalized_39_window0.png	2.23	39	0	1_ShearNormalized	2	TRUE	signal	correct	TRUE
508	cac97d06-17ff-11e8-b122-44a84224eb5b	2	2	topics5_12St_FiberTapSt_Serv_1_ShearNormalized_18_window2.png	topics5_12St_FiberConstSt_MCE_1_ShearNormalized_18_window2.png	topics5_12St_FiberNomSt_Serv_1_ShearNormalized_18_window2.png	2.67	18	2	1_ShearNormalized	2	FALSE	topic	correct	TRUE
509	cac97d06-17ff-11e8-b122-44a84224eb5b	2	2	topics5_12St_FiberConstSt_Serv_1_ShearNormalized_11_window2.png	topics5_12St_FiberNomSt_DBE_1_ShearNormalized_11_window2.png	topics5_12St_FiberTapSt_Serv_1_ShearNormalized_11_window2.png	5.39	11	2	1_ShearNormalized	2	FALSE	topic	correct	TRUE
510	cac97d06-17ff-11e8-b122-44a84224eb5b	2	2	topics5_12St_BHinge_DBE_1_ShearNormalized_17_window0.png	topics5_12St_FiberConstSt_DBE_1_ShearNormalized_17_window0.png	topics5_12St_BHinge_Serv_1_ShearNormalized_17_window0.png	6.74	17	0	1_ShearNormalized	3	FALSE	topic	correct	TRUE
511	cac97d06-17ff-11e8-b122-44a84224eb5b	1	1	topics5_12St_BHinge_DBE_1_ShearNormalized_13_window2.png	topics5_12St_BHinge_MCE_1_ShearNormalized_13_window2.png	topics5_12St_FiberConstSt_DBE_1_ShearNormalized_13_window2.png	2.24	13	2	1_ShearNormalized	1	FALSE	topic	correct	TRUE
512	cac97d06-17ff-11e8-b122-44a84224eb5b	1	2	topics5_12St_FiberNomSt_MCE_1_ShearNormalized_31_window2.png	topics5_12St_FiberConstSt_MCE_1_ShearNormalized_31_window2.png	topics5_12St_FiberTapSt_DBE_1_ShearNormalized_31_window2.png	11.42	31	2	1_ShearNormalized	4	FALSE	topic	incorrect	FALSE
513	ddb331d2-176e-11e8-b122-44a84224eb5b	1	1	topics5_12St_BHinge_MCE_1_ShearNormalized_29_window0.png	topics5_12St_BHinge_DBE_1_ShearNormalized_29_window0.png	topics5_12St_FiberTapSt_MCE_1_ShearNormalized_29_window0.png	4.63	29	0	1_ShearNormalized	1	FALSE	topic	correct	TRUE
514	ddb331d2-176e-11e8-b122-44a84224eb5b	1	1	signals12St_BHinge_DBE_1_ShearNormalized_21_window2.png	signals12St_BHinge_Serv_1_ShearNormalized_21_window2.png	signals12St_FiberNomSt_DBE_1_ShearNormalized_21_window2.png	3.93	21	2	1_ShearNormalized	3	TRUE	signal	correct	TRUE
515	ddb331d2-176e-11e8-b122-44a84224eb5b	2	2	topics5_12St_FiberConstSt_Serv_1_ShearNormalized_17_window0.png	topics5_12St_FiberTapSt_DBE_1_ShearNormalized_17_window0.png	topics5_12St_FiberNomSt_Serv_1_ShearNormalized_17_window0.png	6.63	17	0	1_ShearNormalized	2	FALSE	topic	correct	TRUE
516	ddb331d2-176e-11e8-b122-44a84224eb5b	1	1	topics5_12St_BHinge_DBE_1_ShearNormalized_47_window1.png	topics5_12St_BHinge_MCE_1_ShearNormalized_47_window1.png	topics5_12St_FiberNomSt_DBE_1_ShearNormalized_47_window1.png	2.79	47	1	1_ShearNormalized	1	FALSE	topic	correct	TRUE
517	ddb331d2-176e-11e8-b122-44a84224eb5b	2	2	signals12St_FiberTapSt_MCE_1_ShearNormalized_22_window1.png	signals12St_FiberConstSt_DBE_1_ShearNormalized_22_window1.png	signals12St_FiberNomSt_MCE_1_ShearNormalized_22_window1.png	6.8	22	1	1_ShearNormalized	4	TRUE	signal	correct	TRUE
518	ddb331d2-176e-11e8-b122-44a84224eb5b	1	1	topics5_12St_BHinge_MCE_1_ShearNormalized_25_window2.png	topics5_12St_BHinge_DBE_1_ShearNormalized_25_window2.png	topics5_12St_FiberConstSt_MCE_1_ShearNormalized_25_window2.png	2.67	25	2	1_ShearNormalized	1	FALSE	topic	correct	TRUE
519	ddb331d2-176e-11e8-b122-44a84224eb5b	1	1	signals12St_FiberConstSt_Serv_1_ShearNormalized_17_window0.png	signals12St_FiberNomSt_Serv_1_ShearNormalized_17_window0.png	signals12St_FiberTapSt_DBE_1_ShearNormalized_17_window0.png	3.75	17	0	1_ShearNormalized	2	TRUE	signal	correct	TRUE
520	ddb331d2-176e-11e8-b122-44a84224eb5b	1	1	topics5_12St_BHinge_MCE_1_ShearNormalized_10_window0.png	topics5_12St_BHinge_DBE_1_ShearNormalized_10_window0.png	topics5_12St_FiberConstSt_MCE_1_ShearNormalized_10_window0.png	2.18	10	0	1_ShearNormalized	1	FALSE	topic	correct	TRUE
521	ddb331d2-176e-11e8-b122-44a84224eb5b	2	2	signals12St_BHinge_MCE_1_ShearNormalized_14_window2.png	signals12St_FiberConstSt_MCE_1_ShearNormalized_14_window2.png	signals12St_BHinge_DBE_1_ShearNormalized_14_window2.png	6.84	14	2	1_ShearNormalized	1	TRUE	signal	correct	TRUE
522	ddb331d2-176e-11e8-b122-44a84224eb5b	2	2	topics5_12St_FiberConstSt_Serv_1_ShearNormalized_02_window2.png	topics5_12St_FiberTapSt_DBE_1_ShearNormalized_02_window2.png	topics5_12St_FiberNomSt_Serv_1_ShearNormalized_02_window2.png	1.53	2	2	1_ShearNormalized	2	FALSE	topic	correct	TRUE
523	ddb331d2-176e-11e8-b122-44a84224eb5b	1	1	topics5_12St_BHinge_MCE_1_ShearNormalized_45_window2.png	topics5_12St_BHinge_MCE_1_ShearNormalized_45_window2.png	topics5_12St_FiberNomSt_MCE_1_ShearNormalized_45_window2.png	3.71	45	2	1_ShearNormalized	0	FALSE	topic	correct	TRUE
524	ddb331d2-176e-11e8-b122-44a84224eb5b	1	1	signals12St_FiberNomSt_Serv_1_ShearNormalized_03_window0.png	signals12St_FiberTapSt_Serv_1_ShearNormalized_03_window0.png	signals12St_FiberConstSt_MCE_1_ShearNormalized_03_window0.png	3.79	3	0	1_ShearNormalized	2	TRUE	signal	correct	TRUE
525	ddb331d2-176e-11e8-b122-44a84224eb5b	2	2	signals12St_FiberTapSt_MCE_1_ShearNormalized_29_window0.png	signals12St_FiberConstSt_DBE_1_ShearNormalized_29_window0.png	signals12St_FiberNomSt_MCE_1_ShearNormalized_29_window0.png	3.37	29	0	1_ShearNormalized	4	TRUE	signal	correct	TRUE
526	ddb331d2-176e-11e8-b122-44a84224eb5b	1	1	topics5_12St_BHinge_MCE_1_ShearNormalized_14_window2.png	topics5_12St_BHinge_DBE_1_ShearNormalized_14_window2.png	topics5_12St_FiberConstSt_MCE_1_ShearNormalized_14_window2.png	2.01	14	2	1_ShearNormalized	1	FALSE	topic	correct	TRUE
527	ddb331d2-176e-11e8-b122-44a84224eb5b	2	2	signals12St_BHinge_MCE_1_ShearNormalized_29_window0.png	signals12St_FiberTapSt_MCE_1_ShearNormalized_29_window0.png	signals12St_BHinge_DBE_1_ShearNormalized_29_window0.png	3.81	29	0	1_ShearNormalized	1	TRUE	signal	correct	TRUE
528	ddb331d2-176e-11e8-b122-44a84224eb5b	1	1	topics5_12St_FiberTapSt_MCE_1_ShearNormalized_22_window1.png	topics5_12St_FiberNomSt_MCE_1_ShearNormalized_22_window1.png	topics5_12St_FiberConstSt_DBE_1_ShearNormalized_22_window1.png	3.36	22	1	1_ShearNormalized	4	FALSE	topic	correct	TRUE
529	ddb331d2-176e-11e8-b122-44a84224eb5b	2	2	topics5_12St_FiberTapSt_Serv_1_ShearNormalized_39_window2.png	topics5_12St_FiberNomSt_DBE_1_ShearNormalized_39_window2.png	topics5_12St_FiberConstSt_Serv_1_ShearNormalized_39_window2.png	1.52	39	2	1_ShearNormalized	2	FALSE	topic	correct	TRUE
530	ddb331d2-176e-11e8-b122-44a84224eb5b	2	2	signals12St_BHinge_DBE_1_ShearNormalized_03_window1.png	signals12St_FiberTapSt_DBE_1_ShearNormalized_03_window1.png	signals12St_BHinge_MCE_1_ShearNormalized_03_window1.png	3.36	3	1	1_ShearNormalized	1	TRUE	signal	correct	TRUE
531	ddb331d2-176e-11e8-b122-44a84224eb5b	1	1	signals12St_FiberConstSt_Serv_1_ShearNormalized_02_window2.png	signals12St_FiberNomSt_Serv_1_ShearNormalized_02_window2.png	signals12St_FiberTapSt_DBE_1_ShearNormalized_02_window2.png	3.37	2	2	1_ShearNormalized	2	TRUE	signal	correct	TRUE
532	ddb331d2-176e-11e8-b122-44a84224eb5b	1	1	topics5_12St_BHinge_DBE_1_ShearNormalized_03_window1.png	topics5_12St_BHinge_MCE_1_ShearNormalized_03_window1.png	topics5_12St_FiberTapSt_DBE_1_ShearNormalized_03_window1.png	1.96	3	1	1_ShearNormalized	1	FALSE	topic	correct	TRUE
533	ddb331d2-176e-11e8-b122-44a84224eb5b	2	2	signals12St_FiberTapSt_MCE_1_ShearNormalized_31_window0.png	signals12St_FiberNomSt_DBE_1_ShearNormalized_31_window0.png	signals12St_FiberConstSt_MCE_1_ShearNormalized_31_window0.png	6.62	31	0	1_ShearNormalized	4	TRUE	signal	correct	TRUE
534	ddb331d2-176e-11e8-b122-44a84224eb5b	1	1	signals12St_FiberTapSt_Serv_1_ShearNormalized_07_window2.png	signals12St_FiberConstSt_Serv_1_ShearNormalized_07_window2.png	signals12St_FiberNomSt_DBE_1_ShearNormalized_07_window2.png	4.85	7	2	1_ShearNormalized	2	TRUE	signal	correct	TRUE
535	ddb331d2-176e-11e8-b122-44a84224eb5b	2	1	signals12St_BHinge_MCE_1_ShearNormalized_10_window0.png	signals12St_FiberConstSt_MCE_1_ShearNormalized_10_window0.png	signals12St_BHinge_DBE_1_ShearNormalized_10_window0.png	1.73	10	0	1_ShearNormalized	1	TRUE	signal	incorrect	FALSE
536	ddb331d2-176e-11e8-b122-44a84224eb5b	2	2	topics5_12St_FiberNomSt_Serv_1_ShearNormalized_03_window0.png	topics5_12St_FiberConstSt_MCE_1_ShearNormalized_03_window0.png	topics5_12St_FiberTapSt_Serv_1_ShearNormalized_03_window0.png	1.95	3	0	1_ShearNormalized	2	FALSE	topic	correct	TRUE
537	ddb331d2-176e-11e8-b122-44a84224eb5b	1	1	topics5_12St_FiberTapSt_MCE_1_ShearNormalized_29_window0.png	topics5_12St_FiberNomSt_MCE_1_ShearNormalized_29_window0.png	topics5_12St_FiberConstSt_DBE_1_ShearNormalized_29_window0.png	5.11	29	0	1_ShearNormalized	4	FALSE	topic	correct	TRUE
538	ddb331d2-176e-11e8-b122-44a84224eb5b	2	2	signals12St_BHinge_MCE_1_ShearNormalized_45_window2.png	signals12St_FiberNomSt_MCE_1_ShearNormalized_45_window2.png	signals12St_BHinge_MCE_1_ShearNormalized_45_window2.png	2.28	45	2	1_ShearNormalized	0	TRUE	signal	correct	TRUE
539	ddb331d2-176e-11e8-b122-44a84224eb5b	1	1	signals12St_FiberTapSt_Serv_1_ShearNormalized_39_window2.png	signals12St_FiberConstSt_Serv_1_ShearNormalized_39_window2.png	signals12St_FiberNomSt_DBE_1_ShearNormalized_39_window2.png	5.96	39	2	1_ShearNormalized	2	TRUE	signal	correct	TRUE
540	ddb331d2-176e-11e8-b122-44a84224eb5b	2	1	signals12St_BHinge_MCE_1_ShearNormalized_25_window2.png	signals12St_FiberConstSt_MCE_1_ShearNormalized_25_window2.png	signals12St_BHinge_DBE_1_ShearNormalized_25_window2.png	7.15	25	2	1_ShearNormalized	1	TRUE	signal	incorrect	FALSE
541	ddb331d2-176e-11e8-b122-44a84224eb5b	1	1	topics5_12St_FiberTapSt_MCE_1_ShearNormalized_31_window0.png	topics5_12St_FiberConstSt_MCE_1_ShearNormalized_31_window0.png	topics5_12St_FiberNomSt_DBE_1_ShearNormalized_31_window0.png	3.44	31	0	1_ShearNormalized	4	FALSE	topic	correct	TRUE
542	ddb331d2-176e-11e8-b122-44a84224eb5b	2	1	signals12St_BHinge_DBE_1_ShearNormalized_47_window1.png	signals12St_FiberNomSt_DBE_1_ShearNormalized_47_window1.png	signals12St_BHinge_MCE_1_ShearNormalized_47_window1.png	3.73	47	1	1_ShearNormalized	1	TRUE	signal	incorrect	FALSE
543	ddb331d2-176e-11e8-b122-44a84224eb5b	2	2	topics5_12St_BHinge_DBE_1_ShearNormalized_21_window2.png	topics5_12St_FiberNomSt_DBE_1_ShearNormalized_21_window2.png	topics5_12St_BHinge_Serv_1_ShearNormalized_21_window2.png	3.1	21	2	1_ShearNormalized	3	FALSE	topic	correct	TRUE
544	ddb331d2-176e-11e8-b122-44a84224eb5b	2	2	topics5_12St_FiberTapSt_Serv_1_ShearNormalized_07_window2.png	topics5_12St_FiberNomSt_DBE_1_ShearNormalized_07_window2.png	topics5_12St_FiberConstSt_Serv_1_ShearNormalized_07_window2.png	1.39	7	2	1_ShearNormalized	2	FALSE	topic	correct	TRUE
545	ddb331d2-176e-11e8-b122-44a84224eb5b	1	1	topics5_12St_BHinge_DBE_1_ShearNormalized_29_window1.png	topics5_12St_BHinge_DBE_1_ShearNormalized_29_window1.png	topics5_12St_FiberNomSt_DBE_1_ShearNormalized_29_window1.png	1.59	29	1	1_ShearNormalized	0	FALSE	topic	correct	TRUE
546	ddb331d2-176e-11e8-b122-44a84224eb5b	2	2	signals12St_BHinge_DBE_1_ShearNormalized_29_window1.png	signals12St_FiberNomSt_DBE_1_ShearNormalized_29_window1.png	signals12St_BHinge_DBE_1_ShearNormalized_29_window1.png	2.1	29	1	1_ShearNormalized	0	TRUE	signal	correct	TRUE
547	e48d2632-1bdf-11e8-b122-44a84224eb5b	2	2	topics5_12St_BHinge_Serv_1_ShearNormalized_30_window0.png	topics5_12St_FiberConstSt_Serv_1_ShearNormalized_30_window0.png	topics5_12St_BHinge_DBE_1_ShearNormalized_30_window0.png	2.8	30	0	1_ShearNormalized	3	FALSE	topic	correct	TRUE
548	e48d2632-1bdf-11e8-b122-44a84224eb5b	1	1	topics5_12St_BHinge_MCE_1_ShearNormalized_04_window2.png	topics5_12St_BHinge_DBE_1_ShearNormalized_04_window2.png	topics5_12St_FiberConstSt_MCE_1_ShearNormalized_04_window2.png	2.28	4	2	1_ShearNormalized	1	FALSE	topic	correct	TRUE
549	e48d2632-1bdf-11e8-b122-44a84224eb5b	2	2	topics5_12St_FiberNomSt_Serv_1_ShearNormalized_45_window0.png	topics5_12St_FiberConstSt_MCE_1_ShearNormalized_45_window0.png	topics5_12St_FiberTapSt_Serv_1_ShearNormalized_45_window0.png	3.99	45	0	1_ShearNormalized	2	FALSE	topic	correct	TRUE
550	e48d2632-1bdf-11e8-b122-44a84224eb5b	1	1	topics5_12St_BHinge_DBE_1_ShearNormalized_28_window2.png	topics5_12St_BHinge_MCE_1_ShearNormalized_28_window2.png	topics5_12St_FiberTapSt_DBE_1_ShearNormalized_28_window2.png	3.46	28	2	1_ShearNormalized	1	FALSE	topic	correct	TRUE
551	e48d2632-1bdf-11e8-b122-44a84224eb5b	1	1	signals12St_FiberTapSt_Serv_1_ShearNormalized_31_window0.png	signals12St_FiberNomSt_Serv_1_ShearNormalized_31_window0.png	signals12St_FiberConstSt_MCE_1_ShearNormalized_31_window0.png	2.1	31	0	1_ShearNormalized	2	TRUE	signal	correct	TRUE
552	e48d2632-1bdf-11e8-b122-44a84224eb5b	1	1	signals12St_FiberTapSt_Serv_1_ShearNormalized_22_window1.png	signals12St_FiberConstSt_Serv_1_ShearNormalized_22_window1.png	signals12St_FiberNomSt_MCE_1_ShearNormalized_22_window1.png	2.93	22	1	1_ShearNormalized	2	TRUE	signal	correct	TRUE
553	e48d2632-1bdf-11e8-b122-44a84224eb5b	1	1	topics5_12St_BHinge_DBE_1_ShearNormalized_07_window0.png	topics5_12St_BHinge_MCE_1_ShearNormalized_07_window0.png	topics5_12St_FiberConstSt_DBE_1_ShearNormalized_07_window0.png	2.36	7	0	1_ShearNormalized	1	FALSE	topic	correct	TRUE
554	e48d2632-1bdf-11e8-b122-44a84224eb5b	1	1	signals12St_BHinge_Serv_1_ShearNormalized_30_window0.png	signals12St_BHinge_DBE_1_ShearNormalized_30_window0.png	signals12St_FiberConstSt_Serv_1_ShearNormalized_30_window0.png	5.13	30	0	1_ShearNormalized	3	TRUE	signal	correct	TRUE
555	e48d2632-1bdf-11e8-b122-44a84224eb5b	2	2	signals12St_BHinge_MCE_1_ShearNormalized_41_window1.png	signals12St_FiberTapSt_MCE_1_ShearNormalized_41_window1.png	signals12St_BHinge_MCE_1_ShearNormalized_41_window1.png	2.4	41	1	1_ShearNormalized	0	TRUE	signal	correct	TRUE
556	e48d2632-1bdf-11e8-b122-44a84224eb5b	2	2	signals12St_FiberTapSt_MCE_1_ShearNormalized_31_window2.png	signals12St_FiberConstSt_DBE_1_ShearNormalized_31_window2.png	signals12St_FiberNomSt_MCE_1_ShearNormalized_31_window2.png	2.44	31	2	1_ShearNormalized	4	TRUE	signal	correct	TRUE
557	e48d2632-1bdf-11e8-b122-44a84224eb5b	1	1	topics5_12St_BHinge_MCE_1_ShearNormalized_27_window0.png	topics5_12St_BHinge_DBE_1_ShearNormalized_27_window0.png	topics5_12St_FiberNomSt_MCE_1_ShearNormalized_27_window0.png	3.04	27	0	1_ShearNormalized	1	FALSE	topic	correct	TRUE
558	e48d2632-1bdf-11e8-b122-44a84224eb5b	1	1	signals12St_FiberTapSt_Serv_1_ShearNormalized_31_window2.png	signals12St_FiberNomSt_Serv_1_ShearNormalized_31_window2.png	signals12St_FiberConstSt_DBE_1_ShearNormalized_31_window2.png	3.87	31	2	1_ShearNormalized	2	TRUE	signal	correct	TRUE
559	e48d2632-1bdf-11e8-b122-44a84224eb5b	1	1	topics5_12St_FiberTapSt_MCE_1_ShearNormalized_40_window2.png	topics5_12St_FiberNomSt_MCE_1_ShearNormalized_40_window2.png	topics5_12St_FiberConstSt_DBE_1_ShearNormalized_40_window2.png	2.59	40	2	1_ShearNormalized	4	FALSE	topic	correct	TRUE
560	e48d2632-1bdf-11e8-b122-44a84224eb5b	1	1	signals12St_FiberNomSt_Serv_1_ShearNormalized_40_window1.png	signals12St_FiberTapSt_Serv_1_ShearNormalized_40_window1.png	signals12St_FiberConstSt_MCE_1_ShearNormalized_40_window1.png	2.23	40	1	1_ShearNormalized	2	TRUE	signal	correct	TRUE
561	e48d2632-1bdf-11e8-b122-44a84224eb5b	2	2	signals12St_BHinge_DBE_1_ShearNormalized_28_window2.png	signals12St_FiberTapSt_DBE_1_ShearNormalized_28_window2.png	signals12St_BHinge_MCE_1_ShearNormalized_28_window2.png	3.14	28	2	1_ShearNormalized	1	TRUE	signal	correct	TRUE
562	e48d2632-1bdf-11e8-b122-44a84224eb5b	1	1	topics5_12St_BHinge_DBE_1_ShearNormalized_39_window1.png	topics5_12St_BHinge_MCE_1_ShearNormalized_39_window1.png	topics5_12St_FiberTapSt_DBE_1_ShearNormalized_39_window1.png	2.94	39	1	1_ShearNormalized	1	FALSE	topic	correct	TRUE
563	e48d2632-1bdf-11e8-b122-44a84224eb5b	1	1	topics5_12St_FiberTapSt_MCE_1_ShearNormalized_31_window2.png	topics5_12St_FiberNomSt_MCE_1_ShearNormalized_31_window2.png	topics5_12St_FiberConstSt_DBE_1_ShearNormalized_31_window2.png	3.3	31	2	1_ShearNormalized	4	FALSE	topic	correct	TRUE
564	e48d2632-1bdf-11e8-b122-44a84224eb5b	2	2	signals12St_BHinge_MCE_1_ShearNormalized_04_window2.png	signals12St_FiberConstSt_MCE_1_ShearNormalized_04_window2.png	signals12St_BHinge_DBE_1_ShearNormalized_04_window2.png	8.59	4	2	1_ShearNormalized	1	TRUE	signal	correct	TRUE
565	e48d2632-1bdf-11e8-b122-44a84224eb5b	2	2	topics5_12St_FiberTapSt_Serv_1_ShearNormalized_31_window2.png	topics5_12St_FiberConstSt_DBE_1_ShearNormalized_31_window2.png	topics5_12St_FiberNomSt_Serv_1_ShearNormalized_31_window2.png	2.38	31	2	1_ShearNormalized	2	FALSE	topic	correct	TRUE
566	e48d2632-1bdf-11e8-b122-44a84224eb5b	1	2	signals12St_BHinge_MCE_1_ShearNormalized_17_window0.png	signals12St_BHinge_Serv_1_ShearNormalized_17_window0.png	signals12St_FiberConstSt_MCE_1_ShearNormalized_17_window0.png	6.49	17	0	1_ShearNormalized	3	TRUE	signal	incorrect	FALSE
567	e48d2632-1bdf-11e8-b122-44a84224eb5b	1	1	topics5_12St_BHinge_DBE_1_ShearNormalized_14_window0.png	topics5_12St_BHinge_MCE_1_ShearNormalized_14_window0.png	topics5_12St_FiberTapSt_DBE_1_ShearNormalized_14_window0.png	3.35	14	0	1_ShearNormalized	1	FALSE	topic	correct	TRUE
568	e48d2632-1bdf-11e8-b122-44a84224eb5b	2	2	signals12St_BHinge_MCE_1_ShearNormalized_27_window0.png	signals12St_FiberNomSt_MCE_1_ShearNormalized_27_window0.png	signals12St_BHinge_DBE_1_ShearNormalized_27_window0.png	4.38	27	0	1_ShearNormalized	1	TRUE	signal	correct	TRUE
569	e48d2632-1bdf-11e8-b122-44a84224eb5b	2	1	signals12St_BHinge_DBE_1_ShearNormalized_39_window1.png	signals12St_FiberTapSt_DBE_1_ShearNormalized_39_window1.png	signals12St_BHinge_MCE_1_ShearNormalized_39_window1.png	2.07	39	1	1_ShearNormalized	1	TRUE	signal	incorrect	FALSE
570	e48d2632-1bdf-11e8-b122-44a84224eb5b	2	2	signals12St_BHinge_DBE_1_ShearNormalized_07_window0.png	signals12St_FiberConstSt_DBE_1_ShearNormalized_07_window0.png	signals12St_BHinge_MCE_1_ShearNormalized_07_window0.png	4.51	7	0	1_ShearNormalized	1	TRUE	signal	correct	TRUE
571	e48d2632-1bdf-11e8-b122-44a84224eb5b	2	2	signals12St_BHinge_DBE_1_ShearNormalized_14_window0.png	signals12St_FiberTapSt_DBE_1_ShearNormalized_14_window0.png	signals12St_BHinge_MCE_1_ShearNormalized_14_window0.png	3.47	14	0	1_ShearNormalized	1	TRUE	signal	correct	TRUE
572	e48d2632-1bdf-11e8-b122-44a84224eb5b	2	1	signals12St_FiberTapSt_MCE_1_ShearNormalized_40_window2.png	signals12St_FiberConstSt_DBE_1_ShearNormalized_40_window2.png	signals12St_FiberNomSt_MCE_1_ShearNormalized_40_window2.png	2.58	40	2	1_ShearNormalized	4	TRUE	signal	incorrect	FALSE
573	e48d2632-1bdf-11e8-b122-44a84224eb5b	2	2	topics5_12St_FiberTapSt_Serv_1_ShearNormalized_31_window0.png	topics5_12St_FiberConstSt_MCE_1_ShearNormalized_31_window0.png	topics5_12St_FiberNomSt_Serv_1_ShearNormalized_31_window0.png	4.35	31	0	1_ShearNormalized	2	FALSE	topic	correct	TRUE
574	e48d2632-1bdf-11e8-b122-44a84224eb5b	1	1	signals12St_FiberNomSt_Serv_1_ShearNormalized_45_window0.png	signals12St_FiberTapSt_Serv_1_ShearNormalized_45_window0.png	signals12St_FiberConstSt_MCE_1_ShearNormalized_45_window0.png	3.32	45	0	1_ShearNormalized	2	TRUE	signal	correct	TRUE
575	e48d2632-1bdf-11e8-b122-44a84224eb5b	2	2	topics5_12St_FiberTapSt_Serv_1_ShearNormalized_22_window1.png	topics5_12St_FiberNomSt_MCE_1_ShearNormalized_22_window1.png	topics5_12St_FiberConstSt_Serv_1_ShearNormalized_22_window1.png	5.49	22	1	1_ShearNormalized	2	FALSE	topic	correct	TRUE
576	e48d2632-1bdf-11e8-b122-44a84224eb5b	2	2	topics5_12St_FiberNomSt_Serv_1_ShearNormalized_40_window1.png	topics5_12St_FiberConstSt_MCE_1_ShearNormalized_40_window1.png	topics5_12St_FiberTapSt_Serv_1_ShearNormalized_40_window1.png	1.98	40	1	1_ShearNormalized	2	FALSE	topic	correct	TRUE
577	e48d2632-1bdf-11e8-b122-44a84224eb5b	1	1	topics5_12St_BHinge_MCE_1_ShearNormalized_41_window1.png	topics5_12St_BHinge_MCE_1_ShearNormalized_41_window1.png	topics5_12St_FiberTapSt_MCE_1_ShearNormalized_41_window1.png	2.03	41	1	1_ShearNormalized	0	FALSE	topic	correct	TRUE
578	e48d2632-1bdf-11e8-b122-44a84224eb5b	2	1	topics5_12St_BHinge_MCE_1_ShearNormalized_17_window0.png	topics5_12St_FiberConstSt_MCE_1_ShearNormalized_17_window0.png	topics5_12St_BHinge_Serv_1_ShearNormalized_17_window0.png	5.57	17	0	1_ShearNormalized	3	FALSE	topic	incorrect	FALSE
579	e48d2632-1bdf-11e8-b122-44a84224eb5b	2	2	signals12St_BHinge_DBE_1_ShearNormalized_42_window0.png	signals12St_FiberConstSt_DBE_1_ShearNormalized_42_window0.png	signals12St_BHinge_DBE_1_ShearNormalized_42_window0.png	4.92	42	0	1_ShearNormalized	0	TRUE	signal	correct	TRUE
580	e48d2632-1bdf-11e8-b122-44a84224eb5b	1	1	topics5_12St_BHinge_DBE_1_ShearNormalized_42_window0.png	topics5_12St_BHinge_DBE_1_ShearNormalized_42_window0.png	topics5_12St_FiberConstSt_DBE_1_ShearNormalized_42_window0.png	5.22	42	0	1_ShearNormalized	0	FALSE	topic	correct	TRUE
581	f902a11e-181a-11e8-b122-44a84224eb5b	2	2	topics5_12St_FiberNomSt_Serv_1_ShearNormalized_16_window2.png	topics5_12St_FiberConstSt_DBE_1_ShearNormalized_16_window2.png	topics5_12St_FiberTapSt_Serv_1_ShearNormalized_16_window2.png	2.23	16	2	1_ShearNormalized	2	FALSE	topic	correct	TRUE
582	f902a11e-181a-11e8-b122-44a84224eb5b	2	2	topics5_12St_FiberNomSt_Serv_1_ShearNormalized_12_window0.png	topics5_12St_FiberConstSt_DBE_1_ShearNormalized_12_window0.png	topics5_12St_FiberTapSt_Serv_1_ShearNormalized_12_window0.png	3.98	12	0	1_ShearNormalized	2	FALSE	topic	correct	TRUE
583	f902a11e-181a-11e8-b122-44a84224eb5b	1	1	signals12St_FiberNomSt_Serv_1_ShearNormalized_16_window2.png	signals12St_FiberTapSt_Serv_1_ShearNormalized_16_window2.png	signals12St_FiberConstSt_DBE_1_ShearNormalized_16_window2.png	4.03	16	2	1_ShearNormalized	2	TRUE	signal	correct	TRUE
584	f902a11e-181a-11e8-b122-44a84224eb5b	1	2	signals12St_BHinge_MCE_1_ShearNormalized_29_window1.png	signals12St_BHinge_Serv_1_ShearNormalized_29_window1.png	signals12St_FiberTapSt_MCE_1_ShearNormalized_29_window1.png	8.63	29	1	1_ShearNormalized	3	TRUE	signal	incorrect	FALSE
585	f902a11e-181a-11e8-b122-44a84224eb5b	1	1	topics5_12St_BHinge_MCE_1_ShearNormalized_19_window0.png	topics5_12St_BHinge_MCE_1_ShearNormalized_19_window0.png	topics5_12St_FiberConstSt_MCE_1_ShearNormalized_19_window0.png	2.2	19	0	1_ShearNormalized	0	FALSE	topic	correct	TRUE
586	f902a11e-181a-11e8-b122-44a84224eb5b	2	2	topics5_12St_FiberConstSt_Serv_1_ShearNormalized_09_window1.png	topics5_12St_FiberNomSt_MCE_1_ShearNormalized_09_window1.png	topics5_12St_FiberTapSt_Serv_1_ShearNormalized_09_window1.png	2.81	9	1	1_ShearNormalized	2	FALSE	topic	correct	TRUE
587	f902a11e-181a-11e8-b122-44a84224eb5b	1	1	topics5_12St_BHinge_MCE_1_ShearNormalized_39_window1.png	topics5_12St_BHinge_DBE_1_ShearNormalized_39_window1.png	topics5_12St_FiberNomSt_MCE_1_ShearNormalized_39_window1.png	1.86	39	1	1_ShearNormalized	1	FALSE	topic	correct	TRUE
588	f902a11e-181a-11e8-b122-44a84224eb5b	1	1	topics5_12St_BHinge_MCE_1_ShearNormalized_34_window0.png	topics5_12St_BHinge_DBE_1_ShearNormalized_34_window0.png	topics5_12St_FiberConstSt_MCE_1_ShearNormalized_34_window0.png	2.66	34	0	1_ShearNormalized	1	FALSE	topic	correct	TRUE
589	f902a11e-181a-11e8-b122-44a84224eb5b	1	1	topics5_12St_BHinge_DBE_1_ShearNormalized_28_window0.png	topics5_12St_BHinge_MCE_1_ShearNormalized_28_window0.png	topics5_12St_FiberTapSt_DBE_1_ShearNormalized_28_window0.png	3.28	28	0	1_ShearNormalized	1	FALSE	topic	correct	TRUE
590	f902a11e-181a-11e8-b122-44a84224eb5b	2	1	topics5_12St_BHinge_Serv_1_ShearNormalized_16_window1.png	topics5_12St_FiberTapSt_Serv_1_ShearNormalized_16_window1.png	topics5_12St_BHinge_MCE_1_ShearNormalized_16_window1.png	4.05	16	1	1_ShearNormalized	3	FALSE	topic	incorrect	FALSE
591	f902a11e-181a-11e8-b122-44a84224eb5b	2	1	signals12St_BHinge_MCE_1_ShearNormalized_34_window0.png	signals12St_FiberConstSt_MCE_1_ShearNormalized_34_window0.png	signals12St_BHinge_DBE_1_ShearNormalized_34_window0.png	8.8	34	0	1_ShearNormalized	1	TRUE	signal	incorrect	FALSE
592	f902a11e-181a-11e8-b122-44a84224eb5b	1	1	signals12St_FiberNomSt_Serv_1_ShearNormalized_01_window1.png	signals12St_FiberTapSt_Serv_1_ShearNormalized_01_window1.png	signals12St_FiberConstSt_MCE_1_ShearNormalized_01_window1.png	2.9	1	1	1_ShearNormalized	2	TRUE	signal	correct	TRUE
593	f902a11e-181a-11e8-b122-44a84224eb5b	1	1	topics5_12St_BHinge_DBE_1_ShearNormalized_45_window0.png	topics5_12St_BHinge_MCE_1_ShearNormalized_45_window0.png	topics5_12St_FiberTapSt_DBE_1_ShearNormalized_45_window0.png	2.37	45	0	1_ShearNormalized	1	FALSE	topic	correct	TRUE
594	f902a11e-181a-11e8-b122-44a84224eb5b	2	2	signals12St_BHinge_MCE_1_ShearNormalized_11_window2.png	signals12St_FiberConstSt_MCE_1_ShearNormalized_11_window2.png	signals12St_BHinge_MCE_1_ShearNormalized_11_window2.png	4.32	11	2	1_ShearNormalized	0	TRUE	signal	correct	TRUE
595	f902a11e-181a-11e8-b122-44a84224eb5b	1	1	signals12St_FiberConstSt_Serv_1_ShearNormalized_09_window1.png	signals12St_FiberTapSt_Serv_1_ShearNormalized_09_window1.png	signals12St_FiberNomSt_MCE_1_ShearNormalized_09_window1.png	2.34	9	1	1_ShearNormalized	2	TRUE	signal	correct	TRUE
596	f902a11e-181a-11e8-b122-44a84224eb5b	2	2	signals12St_FiberConstSt_MCE_1_ShearNormalized_22_window2.png	signals12St_FiberTapSt_DBE_1_ShearNormalized_22_window2.png	signals12St_FiberNomSt_MCE_1_ShearNormalized_22_window2.png	3.51	22	2	1_ShearNormalized	4	TRUE	signal	correct	TRUE
597	f902a11e-181a-11e8-b122-44a84224eb5b	2	2	signals12St_BHinge_DBE_1_ShearNormalized_28_window0.png	signals12St_FiberTapSt_DBE_1_ShearNormalized_28_window0.png	signals12St_BHinge_MCE_1_ShearNormalized_28_window0.png	8.88	28	0	1_ShearNormalized	1	TRUE	signal	correct	TRUE
598	f902a11e-181a-11e8-b122-44a84224eb5b	2	2	signals12St_FiberConstSt_MCE_1_ShearNormalized_15_window1.png	signals12St_FiberTapSt_DBE_1_ShearNormalized_15_window1.png	signals12St_FiberNomSt_MCE_1_ShearNormalized_15_window1.png	5.68	15	1	1_ShearNormalized	4	TRUE	signal	correct	TRUE
599	f902a11e-181a-11e8-b122-44a84224eb5b	2	2	topics5_12St_FiberNomSt_Serv_1_ShearNormalized_01_window1.png	topics5_12St_FiberConstSt_MCE_1_ShearNormalized_01_window1.png	topics5_12St_FiberTapSt_Serv_1_ShearNormalized_01_window1.png	1.45	1	1	1_ShearNormalized	2	FALSE	topic	correct	TRUE
600	f902a11e-181a-11e8-b122-44a84224eb5b	2	2	signals12St_BHinge_MCE_1_ShearNormalized_39_window1.png	signals12St_FiberNomSt_MCE_1_ShearNormalized_39_window1.png	signals12St_BHinge_DBE_1_ShearNormalized_39_window1.png	11.28	39	1	1_ShearNormalized	1	TRUE	signal	correct	TRUE
601	f902a11e-181a-11e8-b122-44a84224eb5b	1	1	topics5_12St_BHinge_MCE_1_ShearNormalized_23_window0.png	topics5_12St_BHinge_DBE_1_ShearNormalized_23_window0.png	topics5_12St_FiberTapSt_MCE_1_ShearNormalized_23_window0.png	4.26	23	0	1_ShearNormalized	1	FALSE	topic	correct	TRUE
602	f902a11e-181a-11e8-b122-44a84224eb5b	1	1	topics5_12St_BHinge_DBE_1_ShearNormalized_43_window2.png	topics5_12St_BHinge_MCE_1_ShearNormalized_43_window2.png	topics5_12St_FiberConstSt_DBE_1_ShearNormalized_43_window2.png	11.87	43	2	1_ShearNormalized	1	FALSE	topic	correct	TRUE
603	f902a11e-181a-11e8-b122-44a84224eb5b	1	2	signals12St_BHinge_Serv_1_ShearNormalized_16_window1.png	signals12St_BHinge_MCE_1_ShearNormalized_16_window1.png	signals12St_FiberTapSt_Serv_1_ShearNormalized_16_window1.png	3.35	16	1	1_ShearNormalized	3	TRUE	signal	incorrect	FALSE
604	f902a11e-181a-11e8-b122-44a84224eb5b	2	1	signals12St_BHinge_DBE_1_ShearNormalized_43_window2.png	signals12St_FiberConstSt_DBE_1_ShearNormalized_43_window2.png	signals12St_BHinge_MCE_1_ShearNormalized_43_window2.png	6.74	43	2	1_ShearNormalized	1	TRUE	signal	incorrect	FALSE
605	f902a11e-181a-11e8-b122-44a84224eb5b	1	1	signals12St_BHinge_DBE_1_ShearNormalized_46_window2.png	signals12St_BHinge_Serv_1_ShearNormalized_46_window2.png	signals12St_FiberNomSt_DBE_1_ShearNormalized_46_window2.png	6.54	46	2	1_ShearNormalized	3	TRUE	signal	correct	TRUE
606	f902a11e-181a-11e8-b122-44a84224eb5b	1	1	signals12St_FiberNomSt_Serv_1_ShearNormalized_12_window0.png	signals12St_FiberTapSt_Serv_1_ShearNormalized_12_window0.png	signals12St_FiberConstSt_DBE_1_ShearNormalized_12_window0.png	4.13	12	0	1_ShearNormalized	2	TRUE	signal	correct	TRUE
607	f902a11e-181a-11e8-b122-44a84224eb5b	2	1	topics5_12St_BHinge_MCE_1_ShearNormalized_29_window1.png	topics5_12St_FiberTapSt_MCE_1_ShearNormalized_29_window1.png	topics5_12St_BHinge_Serv_1_ShearNormalized_29_window1.png	3.36	29	1	1_ShearNormalized	3	FALSE	topic	incorrect	FALSE
608	f902a11e-181a-11e8-b122-44a84224eb5b	2	2	signals12St_BHinge_DBE_1_ShearNormalized_45_window0.png	signals12St_FiberTapSt_DBE_1_ShearNormalized_45_window0.png	signals12St_BHinge_MCE_1_ShearNormalized_45_window0.png	7.65	45	0	1_ShearNormalized	1	TRUE	signal	correct	TRUE
609	f902a11e-181a-11e8-b122-44a84224eb5b	1	1	topics5_12St_FiberConstSt_MCE_1_ShearNormalized_22_window2.png	topics5_12St_FiberNomSt_MCE_1_ShearNormalized_22_window2.png	topics5_12St_FiberTapSt_DBE_1_ShearNormalized_22_window2.png	3.37	22	2	1_ShearNormalized	4	FALSE	topic	correct	TRUE
610	f902a11e-181a-11e8-b122-44a84224eb5b	2	1	signals12St_BHinge_MCE_1_ShearNormalized_23_window0.png	signals12St_FiberTapSt_MCE_1_ShearNormalized_23_window0.png	signals12St_BHinge_DBE_1_ShearNormalized_23_window0.png	8.35	23	0	1_ShearNormalized	1	TRUE	signal	incorrect	FALSE
611	f902a11e-181a-11e8-b122-44a84224eb5b	2	1	topics5_12St_BHinge_DBE_1_ShearNormalized_46_window2.png	topics5_12St_FiberNomSt_DBE_1_ShearNormalized_46_window2.png	topics5_12St_BHinge_Serv_1_ShearNormalized_46_window2.png	3.97	46	2	1_ShearNormalized	3	FALSE	topic	incorrect	FALSE
612	f902a11e-181a-11e8-b122-44a84224eb5b	2	2	signals12St_BHinge_MCE_1_ShearNormalized_19_window0.png	signals12St_FiberConstSt_MCE_1_ShearNormalized_19_window0.png	signals12St_BHinge_MCE_1_ShearNormalized_19_window0.png	7.5	19	0	1_ShearNormalized	0	TRUE	signal	correct	TRUE
613	f902a11e-181a-11e8-b122-44a84224eb5b	1	1	topics5_12St_BHinge_MCE_1_ShearNormalized_11_window2.png	topics5_12St_BHinge_MCE_1_ShearNormalized_11_window2.png	topics5_12St_FiberConstSt_MCE_1_ShearNormalized_11_window2.png	2.45	11	2	1_ShearNormalized	0	FALSE	topic	correct	TRUE
614	f902a11e-181a-11e8-b122-44a84224eb5b	1	1	topics5_12St_FiberConstSt_MCE_1_ShearNormalized_15_window1.png	topics5_12St_FiberNomSt_MCE_1_ShearNormalized_15_window1.png	topics5_12St_FiberTapSt_DBE_1_ShearNormalized_15_window1.png	3.35	15	1	1_ShearNormalized	4	FALSE	topic	correct	TRUE
615	fd7cc25a-1816-11e8-b122-44a84224eb5b	2	2	topics5_12St_FiberTapSt_Serv_1_ShearNormalized_10_window1.png	topics5_12St_FiberNomSt_MCE_1_ShearNormalized_10_window1.png	topics5_12St_FiberConstSt_Serv_1_ShearNormalized_10_window1.png	3.76	10	1	1_ShearNormalized	2	FALSE	topic	correct	TRUE
616	fd7cc25a-1816-11e8-b122-44a84224eb5b	2	2	signals12St_FiberNomSt_MCE_1_ShearNormalized_26_window1.png	signals12St_FiberTapSt_DBE_1_ShearNormalized_26_window1.png	signals12St_FiberConstSt_MCE_1_ShearNormalized_26_window1.png	8.58	26	1	1_ShearNormalized	4	TRUE	signal	correct	TRUE
617	fd7cc25a-1816-11e8-b122-44a84224eb5b	1	1	signals12St_BHinge_DBE_1_ShearNormalized_11_window0.png	signals12St_BHinge_Serv_1_ShearNormalized_11_window0.png	signals12St_FiberTapSt_DBE_1_ShearNormalized_11_window0.png	5.13	11	0	1_ShearNormalized	3	TRUE	signal	correct	TRUE
618	fd7cc25a-1816-11e8-b122-44a84224eb5b	1	1	topics5_12St_BHinge_MCE_1_ShearNormalized_36_window2.png	topics5_12St_BHinge_DBE_1_ShearNormalized_36_window2.png	topics5_12St_FiberConstSt_MCE_1_ShearNormalized_36_window2.png	2.36	36	2	1_ShearNormalized	1	FALSE	topic	correct	TRUE
619	fd7cc25a-1816-11e8-b122-44a84224eb5b	1	1	topics5_12St_BHinge_MCE_1_ShearNormalized_34_window2.png	topics5_12St_BHinge_MCE_1_ShearNormalized_34_window2.png	topics5_12St_FiberTapSt_MCE_1_ShearNormalized_34_window2.png	2.83	34	2	1_ShearNormalized	0	FALSE	topic	correct	TRUE
620	fd7cc25a-1816-11e8-b122-44a84224eb5b	1	1	signals12St_FiberTapSt_Serv_1_ShearNormalized_10_window1.png	signals12St_FiberConstSt_Serv_1_ShearNormalized_10_window1.png	signals12St_FiberNomSt_MCE_1_ShearNormalized_10_window1.png	2.61	10	1	1_ShearNormalized	2	TRUE	signal	correct	TRUE
621	fd7cc25a-1816-11e8-b122-44a84224eb5b	2	2	topics5_12St_FiberNomSt_Serv_1_ShearNormalized_32_window1.png	topics5_12St_FiberConstSt_MCE_1_ShearNormalized_32_window1.png	topics5_12St_FiberTapSt_Serv_1_ShearNormalized_32_window1.png	4.35	32	1	1_ShearNormalized	2	FALSE	topic	correct	TRUE
622	fd7cc25a-1816-11e8-b122-44a84224eb5b	1	1	signals12St_BHinge_Serv_1_ShearNormalized_23_window2.png	signals12St_BHinge_DBE_1_ShearNormalized_23_window2.png	signals12St_FiberTapSt_Serv_1_ShearNormalized_23_window2.png	3.98	23	2	1_ShearNormalized	3	TRUE	signal	correct	TRUE
623	fd7cc25a-1816-11e8-b122-44a84224eb5b	1	1	topics5_12St_BHinge_DBE_1_ShearNormalized_18_window1.png	topics5_12St_BHinge_MCE_1_ShearNormalized_18_window1.png	topics5_12St_FiberNomSt_DBE_1_ShearNormalized_18_window1.png	4.26	18	1	1_ShearNormalized	1	FALSE	topic	correct	TRUE
624	fd7cc25a-1816-11e8-b122-44a84224eb5b	2	2	signals12St_FiberTapSt_MCE_1_ShearNormalized_44_window1.png	signals12St_FiberConstSt_DBE_1_ShearNormalized_44_window1.png	signals12St_FiberNomSt_MCE_1_ShearNormalized_44_window1.png	4.61	44	1	1_ShearNormalized	4	TRUE	signal	correct	TRUE
625	fd7cc25a-1816-11e8-b122-44a84224eb5b	2	2	topics5_12St_FiberConstSt_Serv_1_ShearNormalized_13_window2.png	topics5_12St_FiberTapSt_MCE_1_ShearNormalized_13_window2.png	topics5_12St_FiberNomSt_Serv_1_ShearNormalized_13_window2.png	3.24	13	2	1_ShearNormalized	2	FALSE	topic	correct	TRUE
626	fd7cc25a-1816-11e8-b122-44a84224eb5b	1	1	signals12St_FiberNomSt_Serv_1_ShearNormalized_32_window1.png	signals12St_FiberTapSt_Serv_1_ShearNormalized_32_window1.png	signals12St_FiberConstSt_MCE_1_ShearNormalized_32_window1.png	2.96	32	1	1_ShearNormalized	2	TRUE	signal	correct	TRUE
627	fd7cc25a-1816-11e8-b122-44a84224eb5b	2	2	topics5_12St_FiberTapSt_Serv_1_ShearNormalized_41_window1.png	topics5_12St_FiberNomSt_DBE_1_ShearNormalized_41_window1.png	topics5_12St_FiberConstSt_Serv_1_ShearNormalized_41_window1.png	2.99	41	1	1_ShearNormalized	2	FALSE	topic	correct	TRUE
628	fd7cc25a-1816-11e8-b122-44a84224eb5b	2	1	signals12St_BHinge_MCE_1_ShearNormalized_36_window2.png	signals12St_FiberConstSt_MCE_1_ShearNormalized_36_window2.png	signals12St_BHinge_DBE_1_ShearNormalized_36_window2.png	7.17	36	2	1_ShearNormalized	1	TRUE	signal	incorrect	FALSE
629	fd7cc25a-1816-11e8-b122-44a84224eb5b	1	1	topics5_12St_FiberTapSt_MCE_1_ShearNormalized_44_window1.png	topics5_12St_FiberNomSt_MCE_1_ShearNormalized_44_window1.png	topics5_12St_FiberConstSt_DBE_1_ShearNormalized_44_window1.png	2.33	44	1	1_ShearNormalized	4	FALSE	topic	correct	TRUE
630	fd7cc25a-1816-11e8-b122-44a84224eb5b	2	2	topics5_12St_BHinge_Serv_1_ShearNormalized_23_window2.png	topics5_12St_FiberTapSt_Serv_1_ShearNormalized_23_window2.png	topics5_12St_BHinge_DBE_1_ShearNormalized_23_window2.png	6.28	23	2	1_ShearNormalized	3	FALSE	topic	correct	TRUE
631	fd7cc25a-1816-11e8-b122-44a84224eb5b	2	2	signals12St_BHinge_MCE_1_ShearNormalized_32_window1.png	signals12St_FiberNomSt_MCE_1_ShearNormalized_32_window1.png	signals12St_BHinge_DBE_1_ShearNormalized_32_window1.png	6.8	32	1	1_ShearNormalized	1	TRUE	signal	correct	TRUE
632	fd7cc25a-1816-11e8-b122-44a84224eb5b	2	2	topics5_12St_BHinge_Serv_1_ShearNormalized_40_window1.png	topics5_12St_FiberConstSt_Serv_1_ShearNormalized_40_window1.png	topics5_12St_BHinge_MCE_1_ShearNormalized_40_window1.png	5.92	40	1	1_ShearNormalized	3	FALSE	topic	correct	TRUE
633	fd7cc25a-1816-11e8-b122-44a84224eb5b	2	2	signals12St_BHinge_MCE_1_ShearNormalized_10_window2.png	signals12St_FiberNomSt_MCE_1_ShearNormalized_10_window2.png	signals12St_BHinge_DBE_1_ShearNormalized_10_window2.png	9.27	10	2	1_ShearNormalized	1	TRUE	signal	correct	TRUE
634	fd7cc25a-1816-11e8-b122-44a84224eb5b	1	1	topics5_12St_BHinge_MCE_1_ShearNormalized_10_window2.png	topics5_12St_BHinge_DBE_1_ShearNormalized_10_window2.png	topics5_12St_FiberNomSt_MCE_1_ShearNormalized_10_window2.png	2.71	10	2	1_ShearNormalized	1	FALSE	topic	correct	TRUE
635	fd7cc25a-1816-11e8-b122-44a84224eb5b	2	2	signals12St_BHinge_MCE_1_ShearNormalized_34_window2.png	signals12St_FiberTapSt_MCE_1_ShearNormalized_34_window2.png	signals12St_BHinge_MCE_1_ShearNormalized_34_window2.png	2.87	34	2	1_ShearNormalized	0	TRUE	signal	correct	TRUE
636	fd7cc25a-1816-11e8-b122-44a84224eb5b	1	2	topics5_12St_BHinge_MCE_1_ShearNormalized_32_window1.png	topics5_12St_BHinge_DBE_1_ShearNormalized_32_window1.png	topics5_12St_FiberNomSt_MCE_1_ShearNormalized_32_window1.png	4.91	32	1	1_ShearNormalized	1	FALSE	topic	incorrect	FALSE
637	fd7cc25a-1816-11e8-b122-44a84224eb5b	1	1	topics5_12St_FiberTapSt_MCE_1_ShearNormalized_16_window2.png	topics5_12St_FiberNomSt_MCE_1_ShearNormalized_16_window2.png	topics5_12St_FiberConstSt_DBE_1_ShearNormalized_16_window2.png	5.36	16	2	1_ShearNormalized	4	FALSE	topic	correct	TRUE
638	fd7cc25a-1816-11e8-b122-44a84224eb5b	2	2	topics5_12St_BHinge_DBE_1_ShearNormalized_11_window0.png	topics5_12St_FiberTapSt_DBE_1_ShearNormalized_11_window0.png	topics5_12St_BHinge_Serv_1_ShearNormalized_11_window0.png	4.73	11	0	1_ShearNormalized	3	FALSE	topic	correct	TRUE
639	fd7cc25a-1816-11e8-b122-44a84224eb5b	1	1	topics5_12St_BHinge_MCE_1_ShearNormalized_38_window2.png	topics5_12St_BHinge_MCE_1_ShearNormalized_38_window2.png	topics5_12St_FiberNomSt_MCE_1_ShearNormalized_38_window2.png	2.29	38	2	1_ShearNormalized	0	FALSE	topic	correct	TRUE
640	fd7cc25a-1816-11e8-b122-44a84224eb5b	1	1	signals12St_BHinge_Serv_1_ShearNormalized_40_window1.png	signals12St_BHinge_MCE_1_ShearNormalized_40_window1.png	signals12St_FiberConstSt_Serv_1_ShearNormalized_40_window1.png	7.7	40	1	1_ShearNormalized	3	TRUE	signal	correct	TRUE
641	fd7cc25a-1816-11e8-b122-44a84224eb5b	2	2	signals12St_FiberTapSt_MCE_1_ShearNormalized_16_window2.png	signals12St_FiberConstSt_DBE_1_ShearNormalized_16_window2.png	signals12St_FiberNomSt_MCE_1_ShearNormalized_16_window2.png	4.86	16	2	1_ShearNormalized	4	TRUE	signal	correct	TRUE
642	fd7cc25a-1816-11e8-b122-44a84224eb5b	1	2	topics5_12St_FiberNomSt_MCE_1_ShearNormalized_26_window1.png	topics5_12St_FiberConstSt_MCE_1_ShearNormalized_26_window1.png	topics5_12St_FiberTapSt_DBE_1_ShearNormalized_26_window1.png	6.54	26	1	1_ShearNormalized	4	FALSE	topic	incorrect	FALSE
643	fd7cc25a-1816-11e8-b122-44a84224eb5b	2	2	signals12St_BHinge_DBE_1_ShearNormalized_18_window1.png	signals12St_FiberNomSt_DBE_1_ShearNormalized_18_window1.png	signals12St_BHinge_MCE_1_ShearNormalized_18_window1.png	4.24	18	1	1_ShearNormalized	1	TRUE	signal	correct	TRUE
644	fd7cc25a-1816-11e8-b122-44a84224eb5b	1	1	signals12St_FiberConstSt_Serv_1_ShearNormalized_13_window2.png	signals12St_FiberNomSt_Serv_1_ShearNormalized_13_window2.png	signals12St_FiberTapSt_MCE_1_ShearNormalized_13_window2.png	2.57	13	2	1_ShearNormalized	2	TRUE	signal	correct	TRUE
645	fd7cc25a-1816-11e8-b122-44a84224eb5b	1	1	signals12St_FiberTapSt_Serv_1_ShearNormalized_41_window1.png	signals12St_FiberConstSt_Serv_1_ShearNormalized_41_window1.png	signals12St_FiberNomSt_DBE_1_ShearNormalized_41_window1.png	2.66	41	1	1_ShearNormalized	2	TRUE	signal	correct	TRUE
646	fd7cc25a-1816-11e8-b122-44a84224eb5b	2	1	signals12St_FiberConstSt_MCE_1_ShearNormalized_42_window1.png	signals12St_FiberNomSt_DBE_1_ShearNormalized_42_window1.png	signals12St_FiberTapSt_MCE_1_ShearNormalized_42_window1.png	3.35	42	1	1_ShearNormalized	4	TRUE	signal	incorrect	FALSE
647	fd7cc25a-1816-11e8-b122-44a84224eb5b	1	1	topics5_12St_FiberConstSt_MCE_1_ShearNormalized_42_window1.png	topics5_12St_FiberTapSt_MCE_1_ShearNormalized_42_window1.png	topics5_12St_FiberNomSt_DBE_1_ShearNormalized_42_window1.png	12.29	42	1	1_ShearNormalized	4	FALSE	topic	correct	TRUE
648	fd7cc25a-1816-11e8-b122-44a84224eb5b	2	2	signals12St_BHinge_MCE_1_ShearNormalized_38_window2.png	signals12St_FiberNomSt_MCE_1_ShearNormalized_38_window2.png	signals12St_BHinge_MCE_1_ShearNormalized_38_window2.png	3.83	38	2	1_ShearNormalized	0	TRUE	signal	correct	TRUE
