# Supplementary material
Source: publisher figshare collection journal article supplement (https://sage.figshare.com/ndownloader/files/30409910)
Supplement: Supplementary file 5 [file 30409910 › supplemental-material/user_study_data_2.csv]

	uid	corr_res	user_res	image1	image2	image3	time_used	eq	window	feature	rule	is_heatmap	vis_type	test_result	accurate
1	13d0e324-6532-11e9-b92d-44a84224eb5b	1	2	topics5_12St_FiberNomSt_MCE_1_ShearNormalized_36_window0.png	topics5_12St_FiberTapSt_MCE_1_ShearNormalized_36_window0.png	topics5_12St_FiberConstSt_DBE_1_ShearNormalized_36_window0.png	12.16	36	0	1_ShearNormalized	4	FALSE	topic	incorrect	FALSE
2	13d0e324-6532-11e9-b92d-44a84224eb5b	2	2	signals12St_BHinge_MCE_1_ShearNormalized_36_window1.png	signals12St_FiberTapSt_MCE_1_ShearNormalized_36_window1.png	signals12St_BHinge_MCE_1_ShearNormalized_36_window1.png	4.42	36	1	1_ShearNormalized	0	TRUE	heatmap	correct	TRUE
3	13d0e324-6532-11e9-b92d-44a84224eb5b	2	1	topics5_12St_BHinge_DBE_1_ShearNormalized_44_window1.png	topics5_12St_FiberNomSt_DBE_1_ShearNormalized_44_window1.png	topics5_12St_BHinge_Serv_1_ShearNormalized_44_window1.png	9.11	44	1	1_ShearNormalized	3	FALSE	topic	incorrect	FALSE
4	13d0e324-6532-11e9-b92d-44a84224eb5b	1	1	signals12St_FiberNomSt_Serv_1_ShearNormalized_46_window0.png	signals12St_FiberTapSt_Serv_1_ShearNormalized_46_window0.png	signals12St_FiberConstSt_DBE_1_ShearNormalized_46_window0.png	13.59	46	0	1_ShearNormalized	2	TRUE	heatmap	correct	TRUE
5	13d0e324-6532-11e9-b92d-44a84224eb5b	1	1	topics5_12St_FiberTapSt_MCE_1_ShearNormalized_38_window0.png	topics5_12St_FiberNomSt_MCE_1_ShearNormalized_38_window0.png	topics5_12St_FiberConstSt_DBE_1_ShearNormalized_38_window0.png	11.2	38	0	1_ShearNormalized	4	FALSE	topic	correct	TRUE
6	13d0e324-6532-11e9-b92d-44a84224eb5b	2	1	signals12St_FiberNomSt_MCE_1_ShearNormalized_36_window0.png	signals12St_FiberConstSt_DBE_1_ShearNormalized_36_window0.png	signals12St_FiberTapSt_MCE_1_ShearNormalized_36_window0.png	20.38	36	0	1_ShearNormalized	4	TRUE	heatmap	incorrect	FALSE
7	13d0e324-6532-11e9-b92d-44a84224eb5b	1	1	topics5_12St_BHinge_DBE_1_ShearNormalized_20_window2.png	topics5_12St_BHinge_MCE_1_ShearNormalized_20_window2.png	topics5_12St_FiberNomSt_DBE_1_ShearNormalized_20_window2.png	3.07	20	2	1_ShearNormalized	1	FALSE	topic	correct	TRUE
8	13d0e324-6532-11e9-b92d-44a84224eb5b	2	2	signals12St_FiberTapSt_MCE_1_ShearNormalized_20_window2.png	signals12St_FiberNomSt_DBE_1_ShearNormalized_20_window2.png	signals12St_FiberConstSt_MCE_1_ShearNormalized_20_window2.png	6.02	20	2	1_ShearNormalized	4	TRUE	heatmap	correct	TRUE
9	13d0e324-6532-11e9-b92d-44a84224eb5b	2	2	topics5_12St_FiberNomSt_Serv_1_ShearNormalized_46_window0.png	topics5_12St_FiberConstSt_DBE_1_ShearNormalized_46_window0.png	topics5_12St_FiberTapSt_Serv_1_ShearNormalized_46_window0.png	7.68	46	0	1_ShearNormalized	2	FALSE	topic	correct	TRUE
10	13d0e324-6532-11e9-b92d-44a84224eb5b	1	1	topics5_12St_BHinge_DBE_1_ShearNormalized_29_window1.png	topics5_12St_BHinge_MCE_1_ShearNormalized_29_window1.png	topics5_12St_FiberConstSt_DBE_1_ShearNormalized_29_window1.png	3.87	29	1	1_ShearNormalized	1	FALSE	topic	correct	TRUE
11	13d0e324-6532-11e9-b92d-44a84224eb5b	1	1	topics5_12St_BHinge_DBE_1_ShearNormalized_39_window2.png	topics5_12St_BHinge_MCE_1_ShearNormalized_39_window2.png	topics5_12St_FiberNomSt_DBE_1_ShearNormalized_39_window2.png	2.86	39	2	1_ShearNormalized	1	FALSE	topic	correct	TRUE
12	13d0e324-6532-11e9-b92d-44a84224eb5b	2	2	signals12St_FiberTapSt_MCE_1_ShearNormalized_15_window0.png	signals12St_FiberConstSt_DBE_1_ShearNormalized_15_window0.png	signals12St_FiberNomSt_MCE_1_ShearNormalized_15_window0.png	6.86	15	0	1_ShearNormalized	4	TRUE	heatmap	correct	TRUE
13	13d0e324-6532-11e9-b92d-44a84224eb5b	2	2	topics5_12St_FiberTapSt_Serv_1_ShearNormalized_28_window1.png	topics5_12St_FiberConstSt_MCE_1_ShearNormalized_28_window1.png	topics5_12St_FiberNomSt_Serv_1_ShearNormalized_28_window1.png	1.71	28	1	1_ShearNormalized	2	FALSE	topic	correct	TRUE
14	13d0e324-6532-11e9-b92d-44a84224eb5b	2	1	signals12St_BHinge_DBE_1_ShearNormalized_35_window1.png	signals12St_FiberConstSt_DBE_1_ShearNormalized_35_window1.png	signals12St_BHinge_MCE_1_ShearNormalized_35_window1.png	4.89	35	1	1_ShearNormalized	1	TRUE	heatmap	incorrect	FALSE
15	13d0e324-6532-11e9-b92d-44a84224eb5b	1	2	signals12St_BHinge_MCE_1_ShearNormalized_23_window2.png	signals12St_BHinge_Serv_1_ShearNormalized_23_window2.png	signals12St_FiberNomSt_MCE_1_ShearNormalized_23_window2.png	3.46	23	2	1_ShearNormalized	3	TRUE	heatmap	incorrect	FALSE
16	13d0e324-6532-11e9-b92d-44a84224eb5b	1	1	signals12St_FiberTapSt_Serv_1_ShearNormalized_28_window1.png	signals12St_FiberNomSt_Serv_1_ShearNormalized_28_window1.png	signals12St_FiberConstSt_MCE_1_ShearNormalized_28_window1.png	2.23	28	1	1_ShearNormalized	2	TRUE	heatmap	correct	TRUE
17	13d0e324-6532-11e9-b92d-44a84224eb5b	1	1	topics5_12St_BHinge_DBE_1_ShearNormalized_35_window1.png	topics5_12St_BHinge_MCE_1_ShearNormalized_35_window1.png	topics5_12St_FiberConstSt_DBE_1_ShearNormalized_35_window1.png	1.73	35	1	1_ShearNormalized	1	FALSE	topic	correct	TRUE
18	13d0e324-6532-11e9-b92d-44a84224eb5b	1	2	signals12St_BHinge_DBE_1_ShearNormalized_44_window1.png	signals12St_BHinge_Serv_1_ShearNormalized_44_window1.png	signals12St_FiberNomSt_DBE_1_ShearNormalized_44_window1.png	4.63	44	1	1_ShearNormalized	3	TRUE	heatmap	incorrect	FALSE
19	13d0e324-6532-11e9-b92d-44a84224eb5b	2	1	signals12St_FiberConstSt_MCE_1_ShearNormalized_19_window2.png	signals12St_FiberNomSt_DBE_1_ShearNormalized_19_window2.png	signals12St_FiberTapSt_MCE_1_ShearNormalized_19_window2.png	4.37	19	2	1_ShearNormalized	4	TRUE	heatmap	incorrect	FALSE
20	13d0e324-6532-11e9-b92d-44a84224eb5b	1	1	topics5_12St_FiberTapSt_MCE_1_ShearNormalized_20_window2.png	topics5_12St_FiberConstSt_MCE_1_ShearNormalized_20_window2.png	topics5_12St_FiberNomSt_DBE_1_ShearNormalized_20_window2.png	4.38	20	2	1_ShearNormalized	4	FALSE	topic	correct	TRUE
21	13d0e324-6532-11e9-b92d-44a84224eb5b	2	1	signals12St_BHinge_DBE_1_ShearNormalized_39_window2.png	signals12St_FiberNomSt_DBE_1_ShearNormalized_39_window2.png	signals12St_BHinge_MCE_1_ShearNormalized_39_window2.png	13.66	39	2	1_ShearNormalized	1	TRUE	heatmap	incorrect	FALSE
22	13d0e324-6532-11e9-b92d-44a84224eb5b	1	1	topics5_12St_FiberTapSt_MCE_1_ShearNormalized_15_window0.png	topics5_12St_FiberNomSt_MCE_1_ShearNormalized_15_window0.png	topics5_12St_FiberConstSt_DBE_1_ShearNormalized_15_window0.png	10.3	15	0	1_ShearNormalized	4	FALSE	topic	correct	TRUE
23	13d0e324-6532-11e9-b92d-44a84224eb5b	2	1	signals12St_BHinge_DBE_1_ShearNormalized_20_window2.png	signals12St_FiberNomSt_DBE_1_ShearNormalized_20_window2.png	signals12St_BHinge_MCE_1_ShearNormalized_20_window2.png	3.17	20	2	1_ShearNormalized	1	TRUE	heatmap	incorrect	FALSE
24	13d0e324-6532-11e9-b92d-44a84224eb5b	1	1	topics5_12St_FiberConstSt_MCE_1_ShearNormalized_19_window2.png	topics5_12St_FiberTapSt_MCE_1_ShearNormalized_19_window2.png	topics5_12St_FiberNomSt_DBE_1_ShearNormalized_19_window2.png	3.83	19	2	1_ShearNormalized	4	FALSE	topic	correct	TRUE
25	13d0e324-6532-11e9-b92d-44a84224eb5b	2	2	signals12St_FiberTapSt_MCE_1_ShearNormalized_38_window0.png	signals12St_FiberConstSt_DBE_1_ShearNormalized_38_window0.png	signals12St_FiberNomSt_MCE_1_ShearNormalized_38_window0.png	9.45	38	0	1_ShearNormalized	4	TRUE	heatmap	correct	TRUE
26	13d0e324-6532-11e9-b92d-44a84224eb5b	2	2	topics5_12St_BHinge_MCE_1_ShearNormalized_23_window2.png	topics5_12St_FiberNomSt_MCE_1_ShearNormalized_23_window2.png	topics5_12St_BHinge_Serv_1_ShearNormalized_23_window2.png	7.02	23	2	1_ShearNormalized	3	FALSE	topic	correct	TRUE
27	13d0e324-6532-11e9-b92d-44a84224eb5b	1	1	signals12St_FiberConstSt_Serv_1_ShearNormalized_32_window0.png	signals12St_FiberTapSt_Serv_1_ShearNormalized_32_window0.png	signals12St_FiberNomSt_DBE_1_ShearNormalized_32_window0.png	3.16	32	0	1_ShearNormalized	2	TRUE	heatmap	correct	TRUE
28	13d0e324-6532-11e9-b92d-44a84224eb5b	2	2	signals12St_BHinge_DBE_1_ShearNormalized_50_window2.png	signals12St_FiberTapSt_DBE_1_ShearNormalized_50_window2.png	signals12St_BHinge_DBE_1_ShearNormalized_50_window2.png	2.75	50	2	1_ShearNormalized	0	TRUE	heatmap	correct	TRUE
29	13d0e324-6532-11e9-b92d-44a84224eb5b	1	1	topics5_12St_BHinge_MCE_1_ShearNormalized_36_window1.png	topics5_12St_BHinge_MCE_1_ShearNormalized_36_window1.png	topics5_12St_FiberTapSt_MCE_1_ShearNormalized_36_window1.png	1.51	36	1	1_ShearNormalized	0	FALSE	topic	correct	TRUE
30	13d0e324-6532-11e9-b92d-44a84224eb5b	1	1	topics5_12St_BHinge_DBE_1_ShearNormalized_50_window2.png	topics5_12St_BHinge_DBE_1_ShearNormalized_50_window2.png	topics5_12St_FiberTapSt_DBE_1_ShearNormalized_50_window2.png	1.53	50	2	1_ShearNormalized	0	FALSE	topic	correct	TRUE
31	13d0e324-6532-11e9-b92d-44a84224eb5b	2	2	signals12St_BHinge_DBE_1_ShearNormalized_29_window1.png	signals12St_FiberConstSt_DBE_1_ShearNormalized_29_window1.png	signals12St_BHinge_MCE_1_ShearNormalized_29_window1.png	3.34	29	1	1_ShearNormalized	1	TRUE	heatmap	correct	TRUE
32	13d0e324-6532-11e9-b92d-44a84224eb5b	2	2	topics5_12St_FiberConstSt_Serv_1_ShearNormalized_32_window0.png	topics5_12St_FiberNomSt_DBE_1_ShearNormalized_32_window0.png	topics5_12St_FiberTapSt_Serv_1_ShearNormalized_32_window0.png	6.59	32	0	1_ShearNormalized	2	FALSE	topic	correct	TRUE
33	13d0e324-6532-11e9-b92d-44a84224eb5b	1	2	signals12St_BHinge_DBE_1_ShearNormalized_02_window1.png	signals12St_BHinge_Serv_1_ShearNormalized_02_window1.png	signals12St_FiberTapSt_DBE_1_ShearNormalized_02_window1.png	5.28	2	1	1_ShearNormalized	3	TRUE	heatmap	incorrect	FALSE
34	13d0e324-6532-11e9-b92d-44a84224eb5b	2	2	topics5_12St_BHinge_DBE_1_ShearNormalized_02_window1.png	topics5_12St_FiberTapSt_DBE_1_ShearNormalized_02_window1.png	topics5_12St_BHinge_Serv_1_ShearNormalized_02_window1.png	5.94	2	1	1_ShearNormalized	3	FALSE	topic	correct	TRUE
35	16645ee4-62c7-11e9-b459-44a84224eb5b	2	2	topics5_12St_BHinge_MCE_1_ShearNormalized_03_window0.png	topics5_12St_FiberTapSt_MCE_1_ShearNormalized_03_window0.png	topics5_12St_BHinge_Serv_1_ShearNormalized_03_window0.png	4.9	3	0	1_ShearNormalized	3	FALSE	topic	correct	TRUE
36	16645ee4-62c7-11e9-b459-44a84224eb5b	1	1	topics5_12St_BHinge_DBE_1_ShearNormalized_38_window0.png	topics5_12St_BHinge_MCE_1_ShearNormalized_38_window0.png	topics5_12St_FiberNomSt_DBE_1_ShearNormalized_38_window0.png	1.93	38	0	1_ShearNormalized	1	FALSE	topic	correct	TRUE
37	16645ee4-62c7-11e9-b459-44a84224eb5b	2	2	signals12St_FiberConstSt_MCE_1_ShearNormalized_22_window1.png	signals12St_FiberTapSt_DBE_1_ShearNormalized_22_window1.png	signals12St_FiberNomSt_MCE_1_ShearNormalized_22_window1.png	4.78	22	1	1_ShearNormalized	4	TRUE	heatmap	correct	TRUE
38	16645ee4-62c7-11e9-b459-44a84224eb5b	1	1	signals12St_FiberNomSt_Serv_1_ShearNormalized_34_window0.png	signals12St_FiberConstSt_Serv_1_ShearNormalized_34_window0.png	signals12St_FiberTapSt_DBE_1_ShearNormalized_34_window0.png	4.46	34	0	1_ShearNormalized	2	TRUE	heatmap	correct	TRUE
39	16645ee4-62c7-11e9-b459-44a84224eb5b	1	1	topics5_12St_BHinge_DBE_1_ShearNormalized_18_window2.png	topics5_12St_BHinge_DBE_1_ShearNormalized_18_window2.png	topics5_12St_FiberTapSt_DBE_1_ShearNormalized_18_window2.png	2.47	18	2	1_ShearNormalized	0	FALSE	topic	correct	TRUE
40	16645ee4-62c7-11e9-b459-44a84224eb5b	1	1	topics5_12St_FiberNomSt_MCE_1_ShearNormalized_12_window2.png	topics5_12St_FiberTapSt_MCE_1_ShearNormalized_12_window2.png	topics5_12St_FiberConstSt_DBE_1_ShearNormalized_12_window2.png	3.33	12	2	1_ShearNormalized	4	FALSE	topic	correct	TRUE
41	16645ee4-62c7-11e9-b459-44a84224eb5b	2	1	topics5_12St_BHinge_MCE_1_ShearNormalized_30_window0.png	topics5_12St_FiberConstSt_MCE_1_ShearNormalized_30_window0.png	topics5_12St_BHinge_Serv_1_ShearNormalized_30_window0.png	6.64	30	0	1_ShearNormalized	3	FALSE	topic	incorrect	FALSE
42	16645ee4-62c7-11e9-b459-44a84224eb5b	2	2	topics5_12St_BHinge_Serv_1_ShearNormalized_21_window0.png	topics5_12St_FiberNomSt_Serv_1_ShearNormalized_21_window0.png	topics5_12St_BHinge_DBE_1_ShearNormalized_21_window0.png	3.97	21	0	1_ShearNormalized	3	FALSE	topic	correct	TRUE
43	16645ee4-62c7-11e9-b459-44a84224eb5b	2	2	signals12St_BHinge_MCE_1_ShearNormalized_13_window2.png	signals12St_FiberTapSt_MCE_1_ShearNormalized_13_window2.png	signals12St_BHinge_MCE_1_ShearNormalized_13_window2.png	2.74	13	2	1_ShearNormalized	0	TRUE	heatmap	correct	TRUE
44	16645ee4-62c7-11e9-b459-44a84224eb5b	2	2	signals12St_FiberNomSt_MCE_1_ShearNormalized_45_window1.png	signals12St_FiberTapSt_DBE_1_ShearNormalized_45_window1.png	signals12St_FiberConstSt_MCE_1_ShearNormalized_45_window1.png	3.69	45	1	1_ShearNormalized	4	TRUE	heatmap	correct	TRUE
45	16645ee4-62c7-11e9-b459-44a84224eb5b	1	1	signals12St_BHinge_Serv_1_ShearNormalized_21_window0.png	signals12St_BHinge_DBE_1_ShearNormalized_21_window0.png	signals12St_FiberNomSt_Serv_1_ShearNormalized_21_window0.png	2.81	21	0	1_ShearNormalized	3	TRUE	heatmap	correct	TRUE
46	16645ee4-62c7-11e9-b459-44a84224eb5b	1	1	topics5_12St_FiberNomSt_MCE_1_ShearNormalized_45_window1.png	topics5_12St_FiberConstSt_MCE_1_ShearNormalized_45_window1.png	topics5_12St_FiberTapSt_DBE_1_ShearNormalized_45_window1.png	5.7	45	1	1_ShearNormalized	4	FALSE	topic	correct	TRUE
47	16645ee4-62c7-11e9-b459-44a84224eb5b	1	1	topics5_12St_BHinge_MCE_1_ShearNormalized_03_window2.png	topics5_12St_BHinge_DBE_1_ShearNormalized_03_window2.png	topics5_12St_FiberTapSt_MCE_1_ShearNormalized_03_window2.png	3.42	3	2	1_ShearNormalized	1	FALSE	topic	correct	TRUE
48	16645ee4-62c7-11e9-b459-44a84224eb5b	1	1	topics5_12St_FiberNomSt_MCE_1_ShearNormalized_49_window1.png	topics5_12St_FiberTapSt_MCE_1_ShearNormalized_49_window1.png	topics5_12St_FiberConstSt_DBE_1_ShearNormalized_49_window1.png	3.26	49	1	1_ShearNormalized	4	FALSE	topic	correct	TRUE
49	16645ee4-62c7-11e9-b459-44a84224eb5b	2	2	signals12St_BHinge_DBE_1_ShearNormalized_18_window2.png	signals12St_FiberTapSt_DBE_1_ShearNormalized_18_window2.png	signals12St_BHinge_DBE_1_ShearNormalized_18_window2.png	4.28	18	2	1_ShearNormalized	0	TRUE	heatmap	correct	TRUE
50	16645ee4-62c7-11e9-b459-44a84224eb5b	1	1	topics5_12St_BHinge_DBE_1_ShearNormalized_20_window1.png	topics5_12St_BHinge_MCE_1_ShearNormalized_20_window1.png	topics5_12St_FiberNomSt_DBE_1_ShearNormalized_20_window1.png	2.58	20	1	1_ShearNormalized	1	FALSE	topic	correct	TRUE
51	16645ee4-62c7-11e9-b459-44a84224eb5b	2	2	signals12St_BHinge_DBE_1_ShearNormalized_38_window0.png	signals12St_FiberNomSt_DBE_1_ShearNormalized_38_window0.png	signals12St_BHinge_MCE_1_ShearNormalized_38_window0.png	4.22	38	0	1_ShearNormalized	1	TRUE	heatmap	correct	TRUE
52	16645ee4-62c7-11e9-b459-44a84224eb5b	1	1	signals12St_BHinge_MCE_1_ShearNormalized_30_window0.png	signals12St_BHinge_Serv_1_ShearNormalized_30_window0.png	signals12St_FiberConstSt_MCE_1_ShearNormalized_30_window0.png	5.41	30	0	1_ShearNormalized	3	TRUE	heatmap	correct	TRUE
53	16645ee4-62c7-11e9-b459-44a84224eb5b	2	2	signals12St_FiberNomSt_MCE_1_ShearNormalized_49_window1.png	signals12St_FiberConstSt_DBE_1_ShearNormalized_49_window1.png	signals12St_FiberTapSt_MCE_1_ShearNormalized_49_window1.png	5.39	49	1	1_ShearNormalized	4	TRUE	heatmap	correct	TRUE
54	16645ee4-62c7-11e9-b459-44a84224eb5b	1	1	signals12St_FiberNomSt_Serv_1_ShearNormalized_05_window1.png	signals12St_FiberConstSt_Serv_1_ShearNormalized_05_window1.png	signals12St_FiberTapSt_MCE_1_ShearNormalized_05_window1.png	2.62	5	1	1_ShearNormalized	2	TRUE	heatmap	correct	TRUE
55	16645ee4-62c7-11e9-b459-44a84224eb5b	1	1	topics5_12St_FiberConstSt_MCE_1_ShearNormalized_22_window1.png	topics5_12St_FiberNomSt_MCE_1_ShearNormalized_22_window1.png	topics5_12St_FiberTapSt_DBE_1_ShearNormalized_22_window1.png	2.83	22	1	1_ShearNormalized	4	FALSE	topic	correct	TRUE
56	16645ee4-62c7-11e9-b459-44a84224eb5b	1	1	topics5_12St_FiberTapSt_MCE_1_ShearNormalized_33_window0.png	topics5_12St_FiberNomSt_MCE_1_ShearNormalized_33_window0.png	topics5_12St_FiberConstSt_DBE_1_ShearNormalized_33_window0.png	9.1	33	0	1_ShearNormalized	4	FALSE	topic	correct	TRUE
57	16645ee4-62c7-11e9-b459-44a84224eb5b	1	2	signals12St_BHinge_MCE_1_ShearNormalized_03_window0.png	signals12St_BHinge_Serv_1_ShearNormalized_03_window0.png	signals12St_FiberTapSt_MCE_1_ShearNormalized_03_window0.png	2.69	3	0	1_ShearNormalized	3	TRUE	heatmap	incorrect	FALSE
58	16645ee4-62c7-11e9-b459-44a84224eb5b	1	1	topics5_12St_BHinge_DBE_1_ShearNormalized_24_window0.png	topics5_12St_BHinge_MCE_1_ShearNormalized_24_window0.png	topics5_12St_FiberNomSt_DBE_1_ShearNormalized_24_window0.png	1.86	24	0	1_ShearNormalized	1	FALSE	topic	correct	TRUE
59	16645ee4-62c7-11e9-b459-44a84224eb5b	2	1	topics5_12St_BHinge_Serv_1_ShearNormalized_12_window2.png	topics5_12St_FiberTapSt_Serv_1_ShearNormalized_12_window2.png	topics5_12St_BHinge_DBE_1_ShearNormalized_12_window2.png	9.26	12	2	1_ShearNormalized	3	FALSE	topic	incorrect	FALSE
60	16645ee4-62c7-11e9-b459-44a84224eb5b	2	1	signals12St_BHinge_MCE_1_ShearNormalized_03_window2.png	signals12St_FiberTapSt_MCE_1_ShearNormalized_03_window2.png	signals12St_BHinge_DBE_1_ShearNormalized_03_window2.png	10.55	3	2	1_ShearNormalized	1	TRUE	heatmap	incorrect	FALSE
61	16645ee4-62c7-11e9-b459-44a84224eb5b	2	2	signals12St_FiberNomSt_MCE_1_ShearNormalized_12_window2.png	signals12St_FiberConstSt_DBE_1_ShearNormalized_12_window2.png	signals12St_FiberTapSt_MCE_1_ShearNormalized_12_window2.png	4.19	12	2	1_ShearNormalized	4	TRUE	heatmap	correct	TRUE
62	16645ee4-62c7-11e9-b459-44a84224eb5b	2	2	signals12St_BHinge_DBE_1_ShearNormalized_24_window0.png	signals12St_FiberNomSt_DBE_1_ShearNormalized_24_window0.png	signals12St_BHinge_MCE_1_ShearNormalized_24_window0.png	6.07	24	0	1_ShearNormalized	1	TRUE	heatmap	correct	TRUE
63	16645ee4-62c7-11e9-b459-44a84224eb5b	1	2	signals12St_BHinge_Serv_1_ShearNormalized_12_window2.png	signals12St_BHinge_DBE_1_ShearNormalized_12_window2.png	signals12St_FiberTapSt_Serv_1_ShearNormalized_12_window2.png	3.14	12	2	1_ShearNormalized	3	TRUE	heatmap	incorrect	FALSE
64	16645ee4-62c7-11e9-b459-44a84224eb5b	2	2	topics5_12St_FiberNomSt_Serv_1_ShearNormalized_34_window0.png	topics5_12St_FiberTapSt_DBE_1_ShearNormalized_34_window0.png	topics5_12St_FiberConstSt_Serv_1_ShearNormalized_34_window0.png	4.83	34	0	1_ShearNormalized	2	FALSE	topic	correct	TRUE
65	16645ee4-62c7-11e9-b459-44a84224eb5b	2	2	topics5_12St_FiberNomSt_Serv_1_ShearNormalized_05_window1.png	topics5_12St_FiberTapSt_MCE_1_ShearNormalized_05_window1.png	topics5_12St_FiberConstSt_Serv_1_ShearNormalized_05_window1.png	2.09	5	1	1_ShearNormalized	2	FALSE	topic	correct	TRUE
66	16645ee4-62c7-11e9-b459-44a84224eb5b	1	1	topics5_12St_BHinge_MCE_1_ShearNormalized_13_window2.png	topics5_12St_BHinge_MCE_1_ShearNormalized_13_window2.png	topics5_12St_FiberTapSt_MCE_1_ShearNormalized_13_window2.png	2.28	13	2	1_ShearNormalized	0	FALSE	topic	correct	TRUE
67	16645ee4-62c7-11e9-b459-44a84224eb5b	2	2	signals12St_FiberTapSt_MCE_1_ShearNormalized_33_window0.png	signals12St_FiberConstSt_DBE_1_ShearNormalized_33_window0.png	signals12St_FiberNomSt_MCE_1_ShearNormalized_33_window0.png	3.67	33	0	1_ShearNormalized	4	TRUE	heatmap	correct	TRUE
68	16645ee4-62c7-11e9-b459-44a84224eb5b	2	1	signals12St_BHinge_DBE_1_ShearNormalized_20_window1.png	signals12St_FiberNomSt_DBE_1_ShearNormalized_20_window1.png	signals12St_BHinge_MCE_1_ShearNormalized_20_window1.png	6.13	20	1	1_ShearNormalized	1	TRUE	heatmap	incorrect	FALSE
69	2fd226ac-6508-11e9-a567-44a84224eb5b	1	1	signals12St_FiberNomSt_Serv_1_ShearNormalized_08_window2.png	signals12St_FiberTapSt_Serv_1_ShearNormalized_08_window2.png	signals12St_FiberConstSt_DBE_1_ShearNormalized_08_window2.png	2.44	8	2	1_ShearNormalized	2	TRUE	heatmap	correct	TRUE
70	2fd226ac-6508-11e9-a567-44a84224eb5b	1	1	topics5_12St_BHinge_MCE_1_ShearNormalized_45_window1.png	topics5_12St_BHinge_MCE_1_ShearNormalized_45_window1.png	topics5_12St_FiberConstSt_MCE_1_ShearNormalized_45_window1.png	2.97	45	1	1_ShearNormalized	0	FALSE	topic	correct	TRUE
71	2fd226ac-6508-11e9-a567-44a84224eb5b	2	2	topics5_12St_FiberNomSt_Serv_1_ShearNormalized_41_window0.png	topics5_12St_FiberTapSt_MCE_1_ShearNormalized_41_window0.png	topics5_12St_FiberConstSt_Serv_1_ShearNormalized_41_window0.png	1.96	41	0	1_ShearNormalized	2	FALSE	topic	correct	TRUE
72	2fd226ac-6508-11e9-a567-44a84224eb5b	2	2	topics5_12St_FiberConstSt_Serv_1_ShearNormalized_03_window2.png	topics5_12St_FiberNomSt_DBE_1_ShearNormalized_03_window2.png	topics5_12St_FiberTapSt_Serv_1_ShearNormalized_03_window2.png	1.29	3	2	1_ShearNormalized	2	FALSE	topic	correct	TRUE
73	2fd226ac-6508-11e9-a567-44a84224eb5b	2	2	signals12St_BHinge_MCE_1_ShearNormalized_18_window2.png	signals12St_FiberNomSt_MCE_1_ShearNormalized_18_window2.png	signals12St_BHinge_DBE_1_ShearNormalized_18_window2.png	1.61	18	2	1_ShearNormalized	1	TRUE	heatmap	correct	TRUE
74	2fd226ac-6508-11e9-a567-44a84224eb5b	2	2	topics5_12St_FiberTapSt_Serv_1_ShearNormalized_20_window0.png	topics5_12St_FiberNomSt_DBE_1_ShearNormalized_20_window0.png	topics5_12St_FiberConstSt_Serv_1_ShearNormalized_20_window0.png	1.65	20	0	1_ShearNormalized	2	FALSE	topic	correct	TRUE
75	2fd226ac-6508-11e9-a567-44a84224eb5b	2	1	topics5_12St_BHinge_MCE_1_ShearNormalized_07_window2.png	topics5_12St_FiberTapSt_MCE_1_ShearNormalized_07_window2.png	topics5_12St_BHinge_Serv_1_ShearNormalized_07_window2.png	1.33	7	2	1_ShearNormalized	3	FALSE	topic	incorrect	FALSE
76	2fd226ac-6508-11e9-a567-44a84224eb5b	1	2	signals12St_FiberNomSt_Serv_1_ShearNormalized_47_window1.png	signals12St_FiberConstSt_Serv_1_ShearNormalized_47_window1.png	signals12St_FiberTapSt_MCE_1_ShearNormalized_47_window1.png	1.43	47	1	1_ShearNormalized	2	TRUE	heatmap	incorrect	FALSE
77	2fd226ac-6508-11e9-a567-44a84224eb5b	2	2	signals12St_BHinge_DBE_1_ShearNormalized_21_window2.png	signals12St_FiberNomSt_DBE_1_ShearNormalized_21_window2.png	signals12St_BHinge_MCE_1_ShearNormalized_21_window2.png	4.49	21	2	1_ShearNormalized	1	TRUE	heatmap	correct	TRUE
78	2fd226ac-6508-11e9-a567-44a84224eb5b	2	2	topics5_12St_FiberTapSt_Serv_1_ShearNormalized_47_window2.png	topics5_12St_FiberConstSt_MCE_1_ShearNormalized_47_window2.png	topics5_12St_FiberNomSt_Serv_1_ShearNormalized_47_window2.png	1.95	47	2	1_ShearNormalized	2	FALSE	topic	correct	TRUE
79	2fd226ac-6508-11e9-a567-44a84224eb5b	2	2	signals12St_FiberTapSt_MCE_1_ShearNormalized_02_window1.png	signals12St_FiberNomSt_DBE_1_ShearNormalized_02_window1.png	signals12St_FiberConstSt_MCE_1_ShearNormalized_02_window1.png	3.59	2	1	1_ShearNormalized	4	TRUE	heatmap	correct	TRUE
80	2fd226ac-6508-11e9-a567-44a84224eb5b	2	2	signals12St_BHinge_MCE_1_ShearNormalized_50_window0.png	signals12St_FiberConstSt_MCE_1_ShearNormalized_50_window0.png	signals12St_BHinge_DBE_1_ShearNormalized_50_window0.png	5.4	50	0	1_ShearNormalized	1	TRUE	heatmap	correct	TRUE
81	2fd226ac-6508-11e9-a567-44a84224eb5b	2	2	topics5_12St_BHinge_MCE_1_ShearNormalized_34_window0.png	topics5_12St_FiberTapSt_MCE_1_ShearNormalized_34_window0.png	topics5_12St_BHinge_Serv_1_ShearNormalized_34_window0.png	4.11	34	0	1_ShearNormalized	3	FALSE	topic	correct	TRUE
82	2fd226ac-6508-11e9-a567-44a84224eb5b	1	2	signals12St_BHinge_MCE_1_ShearNormalized_07_window2.png	signals12St_BHinge_Serv_1_ShearNormalized_07_window2.png	signals12St_FiberTapSt_MCE_1_ShearNormalized_07_window2.png	1.83	7	2	1_ShearNormalized	3	TRUE	heatmap	incorrect	FALSE
83	2fd226ac-6508-11e9-a567-44a84224eb5b	1	2	signals12St_BHinge_MCE_1_ShearNormalized_34_window0.png	signals12St_BHinge_Serv_1_ShearNormalized_34_window0.png	signals12St_FiberTapSt_MCE_1_ShearNormalized_34_window0.png	1.51	34	0	1_ShearNormalized	3	TRUE	heatmap	incorrect	FALSE
84	2fd226ac-6508-11e9-a567-44a84224eb5b	2	2	signals12St_FiberNomSt_MCE_1_ShearNormalized_38_window0.png	signals12St_FiberTapSt_DBE_1_ShearNormalized_38_window0.png	signals12St_FiberConstSt_MCE_1_ShearNormalized_38_window0.png	3.44	38	0	1_ShearNormalized	4	TRUE	heatmap	correct	TRUE
85	2fd226ac-6508-11e9-a567-44a84224eb5b	1	1	topics5_12St_BHinge_MCE_1_ShearNormalized_18_window2.png	topics5_12St_BHinge_DBE_1_ShearNormalized_18_window2.png	topics5_12St_FiberNomSt_MCE_1_ShearNormalized_18_window2.png	2.26	18	2	1_ShearNormalized	1	FALSE	topic	correct	TRUE
86	2fd226ac-6508-11e9-a567-44a84224eb5b	1	1	topics5_12St_FiberNomSt_MCE_1_ShearNormalized_38_window0.png	topics5_12St_FiberConstSt_MCE_1_ShearNormalized_38_window0.png	topics5_12St_FiberTapSt_DBE_1_ShearNormalized_38_window0.png	2.32	38	0	1_ShearNormalized	4	FALSE	topic	correct	TRUE
87	2fd226ac-6508-11e9-a567-44a84224eb5b	2	1	signals12St_FiberTapSt_MCE_1_ShearNormalized_35_window2.png	signals12St_FiberConstSt_DBE_1_ShearNormalized_35_window2.png	signals12St_FiberNomSt_MCE_1_ShearNormalized_35_window2.png	4.24	35	2	1_ShearNormalized	4	TRUE	heatmap	incorrect	FALSE
88	2fd226ac-6508-11e9-a567-44a84224eb5b	1	1	signals12St_FiberConstSt_Serv_1_ShearNormalized_03_window2.png	signals12St_FiberTapSt_Serv_1_ShearNormalized_03_window2.png	signals12St_FiberNomSt_DBE_1_ShearNormalized_03_window2.png	2.02	3	2	1_ShearNormalized	2	TRUE	heatmap	correct	TRUE
89	2fd226ac-6508-11e9-a567-44a84224eb5b	1	1	signals12St_FiberTapSt_Serv_1_ShearNormalized_47_window2.png	signals12St_FiberNomSt_Serv_1_ShearNormalized_47_window2.png	signals12St_FiberConstSt_MCE_1_ShearNormalized_47_window2.png	2.93	47	2	1_ShearNormalized	2	TRUE	heatmap	correct	TRUE
90	2fd226ac-6508-11e9-a567-44a84224eb5b	2	2	signals12St_BHinge_MCE_1_ShearNormalized_45_window1.png	signals12St_FiberConstSt_MCE_1_ShearNormalized_45_window1.png	signals12St_BHinge_MCE_1_ShearNormalized_45_window1.png	1.97	45	1	1_ShearNormalized	0	TRUE	heatmap	correct	TRUE
91	2fd226ac-6508-11e9-a567-44a84224eb5b	1	2	signals12St_BHinge_MCE_1_ShearNormalized_49_window0.png	signals12St_BHinge_Serv_1_ShearNormalized_49_window0.png	signals12St_FiberTapSt_MCE_1_ShearNormalized_49_window0.png	1.88	49	0	1_ShearNormalized	3	TRUE	heatmap	incorrect	FALSE
92	2fd226ac-6508-11e9-a567-44a84224eb5b	2	2	topics5_12St_BHinge_MCE_1_ShearNormalized_49_window0.png	topics5_12St_FiberTapSt_MCE_1_ShearNormalized_49_window0.png	topics5_12St_BHinge_Serv_1_ShearNormalized_49_window0.png	1.9	49	0	1_ShearNormalized	3	FALSE	topic	correct	TRUE
93	2fd226ac-6508-11e9-a567-44a84224eb5b	2	2	topics5_12St_FiberNomSt_Serv_1_ShearNormalized_08_window2.png	topics5_12St_FiberConstSt_DBE_1_ShearNormalized_08_window2.png	topics5_12St_FiberTapSt_Serv_1_ShearNormalized_08_window2.png	3.7	8	2	1_ShearNormalized	2	FALSE	topic	correct	TRUE
94	2fd226ac-6508-11e9-a567-44a84224eb5b	1	1	topics5_12St_BHinge_MCE_1_ShearNormalized_42_window2.png	topics5_12St_BHinge_MCE_1_ShearNormalized_42_window2.png	topics5_12St_FiberConstSt_MCE_1_ShearNormalized_42_window2.png	1.12	42	2	1_ShearNormalized	0	FALSE	topic	correct	TRUE
95	2fd226ac-6508-11e9-a567-44a84224eb5b	2	2	signals12St_BHinge_MCE_1_ShearNormalized_42_window2.png	signals12St_FiberConstSt_MCE_1_ShearNormalized_42_window2.png	signals12St_BHinge_MCE_1_ShearNormalized_42_window2.png	2.67	42	2	1_ShearNormalized	0	TRUE	heatmap	correct	TRUE
96	2fd226ac-6508-11e9-a567-44a84224eb5b	1	1	signals12St_FiberNomSt_Serv_1_ShearNormalized_41_window0.png	signals12St_FiberConstSt_Serv_1_ShearNormalized_41_window0.png	signals12St_FiberTapSt_MCE_1_ShearNormalized_41_window0.png	1.99	41	0	1_ShearNormalized	2	TRUE	heatmap	correct	TRUE
97	2fd226ac-6508-11e9-a567-44a84224eb5b	1	1	topics5_12St_FiberTapSt_MCE_1_ShearNormalized_02_window1.png	topics5_12St_FiberConstSt_MCE_1_ShearNormalized_02_window1.png	topics5_12St_FiberNomSt_DBE_1_ShearNormalized_02_window1.png	4.03	2	1	1_ShearNormalized	4	FALSE	topic	correct	TRUE
98	2fd226ac-6508-11e9-a567-44a84224eb5b	2	2	topics5_12St_FiberNomSt_Serv_1_ShearNormalized_47_window1.png	topics5_12St_FiberTapSt_MCE_1_ShearNormalized_47_window1.png	topics5_12St_FiberConstSt_Serv_1_ShearNormalized_47_window1.png	1.29	47	1	1_ShearNormalized	2	FALSE	topic	correct	TRUE
99	2fd226ac-6508-11e9-a567-44a84224eb5b	1	1	topics5_12St_FiberTapSt_MCE_1_ShearNormalized_35_window2.png	topics5_12St_FiberNomSt_MCE_1_ShearNormalized_35_window2.png	topics5_12St_FiberConstSt_DBE_1_ShearNormalized_35_window2.png	2.3	35	2	1_ShearNormalized	4	FALSE	topic	correct	TRUE
100	2fd226ac-6508-11e9-a567-44a84224eb5b	1	1	topics5_12St_BHinge_MCE_1_ShearNormalized_50_window0.png	topics5_12St_BHinge_DBE_1_ShearNormalized_50_window0.png	topics5_12St_FiberConstSt_MCE_1_ShearNormalized_50_window0.png	1.4	50	0	1_ShearNormalized	1	FALSE	topic	correct	TRUE
101	2fd226ac-6508-11e9-a567-44a84224eb5b	1	1	topics5_12St_BHinge_DBE_1_ShearNormalized_21_window2.png	topics5_12St_BHinge_MCE_1_ShearNormalized_21_window2.png	topics5_12St_FiberNomSt_DBE_1_ShearNormalized_21_window2.png	1.73	21	2	1_ShearNormalized	1	FALSE	topic	correct	TRUE
102	2fd226ac-6508-11e9-a567-44a84224eb5b	1	1	signals12St_FiberTapSt_Serv_1_ShearNormalized_20_window0.png	signals12St_FiberConstSt_Serv_1_ShearNormalized_20_window0.png	signals12St_FiberNomSt_DBE_1_ShearNormalized_20_window0.png	2	20	0	1_ShearNormalized	2	TRUE	heatmap	correct	TRUE
103	4d8bdd20-65dd-11e9-8905-44a84224eb5b	1	2	signals12St_BHinge_Serv_1_ShearNormalized_32_window0.png	signals12St_BHinge_MCE_1_ShearNormalized_32_window0.png	signals12St_FiberConstSt_Serv_1_ShearNormalized_32_window0.png	9.57	32	0	1_ShearNormalized	3	TRUE	heatmap	incorrect	FALSE
104	4d8bdd20-65dd-11e9-8905-44a84224eb5b	2	2	topics5_12St_FiberTapSt_Serv_1_ShearNormalized_40_window2.png	topics5_12St_FiberNomSt_MCE_1_ShearNormalized_40_window2.png	topics5_12St_FiberConstSt_Serv_1_ShearNormalized_40_window2.png	7.05	40	2	1_ShearNormalized	2	FALSE	topic	correct	TRUE
105	4d8bdd20-65dd-11e9-8905-44a84224eb5b	2	2	topics5_12St_FiberNomSt_Serv_1_ShearNormalized_34_window2.png	topics5_12St_FiberConstSt_MCE_1_ShearNormalized_34_window2.png	topics5_12St_FiberTapSt_Serv_1_ShearNormalized_34_window2.png	4.84	34	2	1_ShearNormalized	2	FALSE	topic	correct	TRUE
106	4d8bdd20-65dd-11e9-8905-44a84224eb5b	1	2	signals12St_BHinge_Serv_1_ShearNormalized_37_window0.png	signals12St_BHinge_MCE_1_ShearNormalized_37_window0.png	signals12St_FiberConstSt_Serv_1_ShearNormalized_37_window0.png	9.79	37	0	1_ShearNormalized	3	TRUE	heatmap	incorrect	FALSE
107	4d8bdd20-65dd-11e9-8905-44a84224eb5b	1	1	topics5_12St_BHinge_DBE_1_ShearNormalized_06_window2.png	topics5_12St_BHinge_DBE_1_ShearNormalized_06_window2.png	topics5_12St_FiberConstSt_DBE_1_ShearNormalized_06_window2.png	2.73	6	2	1_ShearNormalized	0	FALSE	topic	correct	TRUE
108	4d8bdd20-65dd-11e9-8905-44a84224eb5b	1	2	signals12St_BHinge_MCE_1_ShearNormalized_38_window1.png	signals12St_BHinge_Serv_1_ShearNormalized_38_window1.png	signals12St_FiberNomSt_MCE_1_ShearNormalized_38_window1.png	12.1	38	1	1_ShearNormalized	3	TRUE	heatmap	incorrect	FALSE
109	4d8bdd20-65dd-11e9-8905-44a84224eb5b	1	2	signals12St_FiberTapSt_Serv_1_ShearNormalized_40_window2.png	signals12St_FiberConstSt_Serv_1_ShearNormalized_40_window2.png	signals12St_FiberNomSt_MCE_1_ShearNormalized_40_window2.png	9.99	40	2	1_ShearNormalized	2	TRUE	heatmap	incorrect	FALSE
110	4d8bdd20-65dd-11e9-8905-44a84224eb5b	1	1	topics5_12St_BHinge_DBE_1_ShearNormalized_32_window1.png	topics5_12St_BHinge_DBE_1_ShearNormalized_32_window1.png	topics5_12St_FiberConstSt_DBE_1_ShearNormalized_32_window1.png	3.47	32	1	1_ShearNormalized	0	FALSE	topic	correct	TRUE
111	4d8bdd20-65dd-11e9-8905-44a84224eb5b	2	2	topics5_12St_FiberTapSt_Serv_1_ShearNormalized_07_window0.png	topics5_12St_FiberNomSt_MCE_1_ShearNormalized_07_window0.png	topics5_12St_FiberConstSt_Serv_1_ShearNormalized_07_window0.png	2.57	7	0	1_ShearNormalized	2	FALSE	topic	correct	TRUE
112	4d8bdd20-65dd-11e9-8905-44a84224eb5b	2	2	topics5_12St_BHinge_Serv_1_ShearNormalized_32_window0.png	topics5_12St_FiberConstSt_Serv_1_ShearNormalized_32_window0.png	topics5_12St_BHinge_MCE_1_ShearNormalized_32_window0.png	3.65	32	0	1_ShearNormalized	3	FALSE	topic	correct	TRUE
113	4d8bdd20-65dd-11e9-8905-44a84224eb5b	1	1	topics5_12St_FiberNomSt_MCE_1_ShearNormalized_33_window0.png	topics5_12St_FiberConstSt_MCE_1_ShearNormalized_33_window0.png	topics5_12St_FiberTapSt_DBE_1_ShearNormalized_33_window0.png	8.92	33	0	1_ShearNormalized	4	FALSE	topic	correct	TRUE
114	4d8bdd20-65dd-11e9-8905-44a84224eb5b	2	2	topics5_12St_BHinge_MCE_1_ShearNormalized_23_window2.png	topics5_12St_FiberConstSt_MCE_1_ShearNormalized_23_window2.png	topics5_12St_BHinge_Serv_1_ShearNormalized_23_window2.png	8.11	23	2	1_ShearNormalized	3	FALSE	topic	correct	TRUE
115	4d8bdd20-65dd-11e9-8905-44a84224eb5b	2	1	signals12St_FiberConstSt_MCE_1_ShearNormalized_23_window2.png	signals12St_FiberTapSt_DBE_1_ShearNormalized_23_window2.png	signals12St_FiberNomSt_MCE_1_ShearNormalized_23_window2.png	8.21	23	2	1_ShearNormalized	4	TRUE	heatmap	incorrect	FALSE
116	4d8bdd20-65dd-11e9-8905-44a84224eb5b	1	2	signals12St_BHinge_MCE_1_ShearNormalized_23_window2.png	signals12St_BHinge_Serv_1_ShearNormalized_23_window2.png	signals12St_FiberConstSt_MCE_1_ShearNormalized_23_window2.png	10.5	23	2	1_ShearNormalized	3	TRUE	heatmap	incorrect	FALSE
117	4d8bdd20-65dd-11e9-8905-44a84224eb5b	2	2	topics5_12St_BHinge_Serv_1_ShearNormalized_37_window0.png	topics5_12St_FiberConstSt_Serv_1_ShearNormalized_37_window0.png	topics5_12St_BHinge_MCE_1_ShearNormalized_37_window0.png	1.89	37	0	1_ShearNormalized	3	FALSE	topic	correct	TRUE
118	4d8bdd20-65dd-11e9-8905-44a84224eb5b	1	2	signals12St_BHinge_Serv_1_ShearNormalized_02_window1.png	signals12St_BHinge_DBE_1_ShearNormalized_02_window1.png	signals12St_FiberNomSt_Serv_1_ShearNormalized_02_window1.png	5.41	2	1	1_ShearNormalized	3	TRUE	heatmap	incorrect	FALSE
119	4d8bdd20-65dd-11e9-8905-44a84224eb5b	1	1	topics5_12St_FiberNomSt_MCE_1_ShearNormalized_34_window1.png	topics5_12St_FiberConstSt_MCE_1_ShearNormalized_34_window1.png	topics5_12St_FiberTapSt_DBE_1_ShearNormalized_34_window1.png	10.57	34	1	1_ShearNormalized	4	FALSE	topic	correct	TRUE
120	4d8bdd20-65dd-11e9-8905-44a84224eb5b	2	1	topics5_12St_BHinge_Serv_1_ShearNormalized_50_window2.png	topics5_12St_FiberNomSt_Serv_1_ShearNormalized_50_window2.png	topics5_12St_BHinge_MCE_1_ShearNormalized_50_window2.png	13.47	50	2	1_ShearNormalized	3	FALSE	topic	incorrect	FALSE
121	4d8bdd20-65dd-11e9-8905-44a84224eb5b	1	1	topics5_12St_BHinge_DBE_1_ShearNormalized_11_window1.png	topics5_12St_BHinge_MCE_1_ShearNormalized_11_window1.png	topics5_12St_FiberConstSt_DBE_1_ShearNormalized_11_window1.png	7.77	11	1	1_ShearNormalized	1	FALSE	topic	correct	TRUE
122	4d8bdd20-65dd-11e9-8905-44a84224eb5b	1	1	signals12St_FiberNomSt_Serv_1_ShearNormalized_34_window2.png	signals12St_FiberTapSt_Serv_1_ShearNormalized_34_window2.png	signals12St_FiberConstSt_MCE_1_ShearNormalized_34_window2.png	4.74	34	2	1_ShearNormalized	2	TRUE	heatmap	correct	TRUE
123	4d8bdd20-65dd-11e9-8905-44a84224eb5b	1	2	signals12St_BHinge_Serv_1_ShearNormalized_50_window2.png	signals12St_BHinge_MCE_1_ShearNormalized_50_window2.png	signals12St_FiberNomSt_Serv_1_ShearNormalized_50_window2.png	8.36	50	2	1_ShearNormalized	3	TRUE	heatmap	incorrect	FALSE
124	4d8bdd20-65dd-11e9-8905-44a84224eb5b	2	1	signals12St_BHinge_DBE_1_ShearNormalized_11_window1.png	signals12St_FiberConstSt_DBE_1_ShearNormalized_11_window1.png	signals12St_BHinge_MCE_1_ShearNormalized_11_window1.png	10.3	11	1	1_ShearNormalized	1	TRUE	heatmap	incorrect	FALSE
125	4d8bdd20-65dd-11e9-8905-44a84224eb5b	1	1	signals12St_FiberTapSt_Serv_1_ShearNormalized_07_window0.png	signals12St_FiberConstSt_Serv_1_ShearNormalized_07_window0.png	signals12St_FiberNomSt_MCE_1_ShearNormalized_07_window0.png	7.29	7	0	1_ShearNormalized	2	TRUE	heatmap	correct	TRUE
126	4d8bdd20-65dd-11e9-8905-44a84224eb5b	1	1	signals12St_BHinge_DBE_1_ShearNormalized_16_window2.png	signals12St_BHinge_Serv_1_ShearNormalized_16_window2.png	signals12St_FiberTapSt_DBE_1_ShearNormalized_16_window2.png	10.65	16	2	1_ShearNormalized	3	TRUE	heatmap	correct	TRUE
127	4d8bdd20-65dd-11e9-8905-44a84224eb5b	2	2	topics5_12St_BHinge_DBE_1_ShearNormalized_16_window2.png	topics5_12St_FiberTapSt_DBE_1_ShearNormalized_16_window2.png	topics5_12St_BHinge_Serv_1_ShearNormalized_16_window2.png	10.23	16	2	1_ShearNormalized	3	FALSE	topic	correct	TRUE
128	4d8bdd20-65dd-11e9-8905-44a84224eb5b	2	2	signals12St_FiberNomSt_MCE_1_ShearNormalized_34_window1.png	signals12St_FiberTapSt_DBE_1_ShearNormalized_34_window1.png	signals12St_FiberConstSt_MCE_1_ShearNormalized_34_window1.png	8.32	34	1	1_ShearNormalized	4	TRUE	heatmap	correct	TRUE
129	4d8bdd20-65dd-11e9-8905-44a84224eb5b	2	2	signals12St_BHinge_DBE_1_ShearNormalized_06_window2.png	signals12St_FiberConstSt_DBE_1_ShearNormalized_06_window2.png	signals12St_BHinge_DBE_1_ShearNormalized_06_window2.png	7.62	6	2	1_ShearNormalized	0	TRUE	heatmap	correct	TRUE
130	4d8bdd20-65dd-11e9-8905-44a84224eb5b	2	2	signals12St_BHinge_DBE_1_ShearNormalized_32_window1.png	signals12St_FiberConstSt_DBE_1_ShearNormalized_32_window1.png	signals12St_BHinge_DBE_1_ShearNormalized_32_window1.png	8.18	32	1	1_ShearNormalized	0	TRUE	heatmap	correct	TRUE
131	4d8bdd20-65dd-11e9-8905-44a84224eb5b	2	2	signals12St_FiberNomSt_MCE_1_ShearNormalized_33_window0.png	signals12St_FiberTapSt_DBE_1_ShearNormalized_33_window0.png	signals12St_FiberConstSt_MCE_1_ShearNormalized_33_window0.png	16.1	33	0	1_ShearNormalized	4	TRUE	heatmap	correct	TRUE
132	4d8bdd20-65dd-11e9-8905-44a84224eb5b	1	2	signals12St_BHinge_DBE_1_ShearNormalized_38_window1.png	signals12St_BHinge_Serv_1_ShearNormalized_38_window1.png	signals12St_FiberNomSt_DBE_1_ShearNormalized_38_window1.png	7.04	38	1	1_ShearNormalized	3	TRUE	heatmap	incorrect	FALSE
133	4d8bdd20-65dd-11e9-8905-44a84224eb5b	2	1	topics5_12St_BHinge_DBE_1_ShearNormalized_38_window1.png	topics5_12St_FiberNomSt_DBE_1_ShearNormalized_38_window1.png	topics5_12St_BHinge_Serv_1_ShearNormalized_38_window1.png	14.34	38	1	1_ShearNormalized	3	FALSE	topic	incorrect	FALSE
134	4d8bdd20-65dd-11e9-8905-44a84224eb5b	1	2	topics5_12St_FiberConstSt_MCE_1_ShearNormalized_23_window2.png	topics5_12St_FiberNomSt_MCE_1_ShearNormalized_23_window2.png	topics5_12St_FiberTapSt_DBE_1_ShearNormalized_23_window2.png	4.02	23	2	1_ShearNormalized	4	FALSE	topic	incorrect	FALSE
135	4d8bdd20-65dd-11e9-8905-44a84224eb5b	2	1	topics5_12St_BHinge_MCE_1_ShearNormalized_38_window1.png	topics5_12St_FiberNomSt_MCE_1_ShearNormalized_38_window1.png	topics5_12St_BHinge_Serv_1_ShearNormalized_38_window1.png	7.55	38	1	1_ShearNormalized	3	FALSE	topic	incorrect	FALSE
136	4d8bdd20-65dd-11e9-8905-44a84224eb5b	2	1	topics5_12St_BHinge_Serv_1_ShearNormalized_02_window1.png	topics5_12St_FiberNomSt_Serv_1_ShearNormalized_02_window1.png	topics5_12St_BHinge_DBE_1_ShearNormalized_02_window1.png	14.21	2	1	1_ShearNormalized	3	FALSE	topic	incorrect	FALSE
137	5356733c-651a-11e9-84e5-44a84224eb5b	2	2	topics5_12St_BHinge_DBE_1_ShearNormalized_05_window2.png	topics5_12St_FiberNomSt_DBE_1_ShearNormalized_05_window2.png	topics5_12St_BHinge_Serv_1_ShearNormalized_05_window2.png	9.16	5	2	1_ShearNormalized	3	FALSE	topic	correct	TRUE
138	5356733c-651a-11e9-84e5-44a84224eb5b	2	2	signals12St_FiberNomSt_MCE_1_ShearNormalized_11_window1.png	signals12St_FiberTapSt_DBE_1_ShearNormalized_11_window1.png	signals12St_FiberConstSt_MCE_1_ShearNormalized_11_window1.png	9.97	11	1	1_ShearNormalized	4	TRUE	heatmap	correct	TRUE
139	5356733c-651a-11e9-84e5-44a84224eb5b	2	2	topics5_12St_FiberNomSt_Serv_1_ShearNormalized_18_window1.png	topics5_12St_FiberTapSt_MCE_1_ShearNormalized_18_window1.png	topics5_12St_FiberConstSt_Serv_1_ShearNormalized_18_window1.png	3.53	18	1	1_ShearNormalized	2	FALSE	topic	correct	TRUE
140	5356733c-651a-11e9-84e5-44a84224eb5b	1	1	topics5_12St_FiberConstSt_MCE_1_ShearNormalized_13_window2.png	topics5_12St_FiberTapSt_MCE_1_ShearNormalized_13_window2.png	topics5_12St_FiberNomSt_DBE_1_ShearNormalized_13_window2.png	7.29	13	2	1_ShearNormalized	4	FALSE	topic	correct	TRUE
141	5356733c-651a-11e9-84e5-44a84224eb5b	2	2	signals12St_BHinge_DBE_1_ShearNormalized_31_window0.png	signals12St_FiberConstSt_DBE_1_ShearNormalized_31_window0.png	signals12St_BHinge_DBE_1_ShearNormalized_31_window0.png	3.48	31	0	1_ShearNormalized	0	TRUE	heatmap	correct	TRUE
142	5356733c-651a-11e9-84e5-44a84224eb5b	1	2	signals12St_BHinge_DBE_1_ShearNormalized_05_window2.png	signals12St_BHinge_Serv_1_ShearNormalized_05_window2.png	signals12St_FiberNomSt_DBE_1_ShearNormalized_05_window2.png	4.97	5	2	1_ShearNormalized	3	TRUE	heatmap	incorrect	FALSE
143	5356733c-651a-11e9-84e5-44a84224eb5b	1	1	signals12St_FiberConstSt_Serv_1_ShearNormalized_20_window1.png	signals12St_FiberNomSt_Serv_1_ShearNormalized_20_window1.png	signals12St_FiberTapSt_DBE_1_ShearNormalized_20_window1.png	6.55	20	1	1_ShearNormalized	2	TRUE	heatmap	correct	TRUE
144	5356733c-651a-11e9-84e5-44a84224eb5b	1	2	topics5_12St_FiberNomSt_MCE_1_ShearNormalized_44_window2.png	topics5_12St_FiberConstSt_MCE_1_ShearNormalized_44_window2.png	topics5_12St_FiberTapSt_DBE_1_ShearNormalized_44_window2.png	3.89	44	2	1_ShearNormalized	4	FALSE	topic	incorrect	FALSE
145	5356733c-651a-11e9-84e5-44a84224eb5b	2	1	topics5_12St_BHinge_MCE_1_ShearNormalized_42_window2.png	topics5_12St_FiberTapSt_MCE_1_ShearNormalized_42_window2.png	topics5_12St_BHinge_Serv_1_ShearNormalized_42_window2.png	8.04	42	2	1_ShearNormalized	3	FALSE	topic	incorrect	FALSE
146	5356733c-651a-11e9-84e5-44a84224eb5b	2	2	signals12St_FiberTapSt_MCE_1_ShearNormalized_41_window1.png	signals12St_FiberNomSt_DBE_1_ShearNormalized_41_window1.png	signals12St_FiberConstSt_MCE_1_ShearNormalized_41_window1.png	3.4	41	1	1_ShearNormalized	4	TRUE	heatmap	correct	TRUE
147	5356733c-651a-11e9-84e5-44a84224eb5b	1	2	signals12St_BHinge_MCE_1_ShearNormalized_42_window2.png	signals12St_BHinge_Serv_1_ShearNormalized_42_window2.png	signals12St_FiberTapSt_MCE_1_ShearNormalized_42_window2.png	3.7	42	2	1_ShearNormalized	3	TRUE	heatmap	incorrect	FALSE
148	5356733c-651a-11e9-84e5-44a84224eb5b	1	1	topics5_12St_BHinge_DBE_1_ShearNormalized_31_window0.png	topics5_12St_BHinge_DBE_1_ShearNormalized_31_window0.png	topics5_12St_FiberConstSt_DBE_1_ShearNormalized_31_window0.png	4.24	31	0	1_ShearNormalized	0	FALSE	topic	correct	TRUE
149	5356733c-651a-11e9-84e5-44a84224eb5b	1	1	topics5_12St_BHinge_MCE_1_ShearNormalized_41_window2.png	topics5_12St_BHinge_DBE_1_ShearNormalized_41_window2.png	topics5_12St_FiberTapSt_MCE_1_ShearNormalized_41_window2.png	2.89	41	2	1_ShearNormalized	1	FALSE	topic	correct	TRUE
150	5356733c-651a-11e9-84e5-44a84224eb5b	1	1	topics5_12St_BHinge_DBE_1_ShearNormalized_37_window0.png	topics5_12St_BHinge_MCE_1_ShearNormalized_37_window0.png	topics5_12St_FiberTapSt_DBE_1_ShearNormalized_37_window0.png	4.08	37	0	1_ShearNormalized	1	FALSE	topic	correct	TRUE
151	5356733c-651a-11e9-84e5-44a84224eb5b	1	1	signals12St_FiberNomSt_Serv_1_ShearNormalized_20_window2.png	signals12St_FiberConstSt_Serv_1_ShearNormalized_20_window2.png	signals12St_FiberTapSt_MCE_1_ShearNormalized_20_window2.png	3.32	20	2	1_ShearNormalized	2	TRUE	heatmap	correct	TRUE
152	5356733c-651a-11e9-84e5-44a84224eb5b	1	1	topics5_12St_BHinge_DBE_1_ShearNormalized_12_window1.png	topics5_12St_BHinge_DBE_1_ShearNormalized_12_window1.png	topics5_12St_FiberTapSt_DBE_1_ShearNormalized_12_window1.png	2.47	12	1	1_ShearNormalized	0	FALSE	topic	correct	TRUE
153	5356733c-651a-11e9-84e5-44a84224eb5b	2	1	signals12St_FiberNomSt_MCE_1_ShearNormalized_44_window2.png	signals12St_FiberTapSt_DBE_1_ShearNormalized_44_window2.png	signals12St_FiberConstSt_MCE_1_ShearNormalized_44_window2.png	4	44	2	1_ShearNormalized	4	TRUE	heatmap	incorrect	FALSE
154	5356733c-651a-11e9-84e5-44a84224eb5b	2	2	signals12St_BHinge_MCE_1_ShearNormalized_41_window2.png	signals12St_FiberTapSt_MCE_1_ShearNormalized_41_window2.png	signals12St_BHinge_DBE_1_ShearNormalized_41_window2.png	6.86	41	2	1_ShearNormalized	1	TRUE	heatmap	correct	TRUE
155	5356733c-651a-11e9-84e5-44a84224eb5b	2	2	topics5_12St_BHinge_DBE_1_ShearNormalized_45_window1.png	topics5_12St_FiberTapSt_DBE_1_ShearNormalized_45_window1.png	topics5_12St_BHinge_Serv_1_ShearNormalized_45_window1.png	6.39	45	1	1_ShearNormalized	3	FALSE	topic	correct	TRUE
156	5356733c-651a-11e9-84e5-44a84224eb5b	2	2	topics5_12St_FiberNomSt_Serv_1_ShearNormalized_26_window2.png	topics5_12St_FiberConstSt_MCE_1_ShearNormalized_26_window2.png	topics5_12St_FiberTapSt_Serv_1_ShearNormalized_26_window2.png	4.98	26	2	1_ShearNormalized	2	FALSE	topic	correct	TRUE
157	5356733c-651a-11e9-84e5-44a84224eb5b	1	1	signals12St_BHinge_Serv_1_ShearNormalized_37_window0.png	signals12St_BHinge_MCE_1_ShearNormalized_37_window0.png	signals12St_FiberConstSt_Serv_1_ShearNormalized_37_window0.png	3.47	37	0	1_ShearNormalized	3	TRUE	heatmap	correct	TRUE
158	5356733c-651a-11e9-84e5-44a84224eb5b	2	2	topics5_12St_BHinge_Serv_1_ShearNormalized_37_window0.png	topics5_12St_FiberConstSt_Serv_1_ShearNormalized_37_window0.png	topics5_12St_BHinge_MCE_1_ShearNormalized_37_window0.png	2.43	37	0	1_ShearNormalized	3	FALSE	topic	correct	TRUE
159	5356733c-651a-11e9-84e5-44a84224eb5b	2	1	signals12St_FiberConstSt_MCE_1_ShearNormalized_13_window2.png	signals12St_FiberNomSt_DBE_1_ShearNormalized_13_window2.png	signals12St_FiberTapSt_MCE_1_ShearNormalized_13_window2.png	3.77	13	2	1_ShearNormalized	4	TRUE	heatmap	incorrect	FALSE
160	5356733c-651a-11e9-84e5-44a84224eb5b	1	1	topics5_12St_FiberNomSt_MCE_1_ShearNormalized_11_window1.png	topics5_12St_FiberConstSt_MCE_1_ShearNormalized_11_window1.png	topics5_12St_FiberTapSt_DBE_1_ShearNormalized_11_window1.png	5.66	11	1	1_ShearNormalized	4	FALSE	topic	correct	TRUE
161	5356733c-651a-11e9-84e5-44a84224eb5b	2	2	topics5_12St_FiberNomSt_Serv_1_ShearNormalized_20_window2.png	topics5_12St_FiberTapSt_MCE_1_ShearNormalized_20_window2.png	topics5_12St_FiberConstSt_Serv_1_ShearNormalized_20_window2.png	2.79	20	2	1_ShearNormalized	2	FALSE	topic	correct	TRUE
162	5356733c-651a-11e9-84e5-44a84224eb5b	2	2	signals12St_BHinge_DBE_1_ShearNormalized_12_window1.png	signals12St_FiberTapSt_DBE_1_ShearNormalized_12_window1.png	signals12St_BHinge_DBE_1_ShearNormalized_12_window1.png	3.02	12	1	1_ShearNormalized	0	TRUE	heatmap	correct	TRUE
163	5356733c-651a-11e9-84e5-44a84224eb5b	1	2	signals12St_BHinge_DBE_1_ShearNormalized_45_window1.png	signals12St_BHinge_Serv_1_ShearNormalized_45_window1.png	signals12St_FiberTapSt_DBE_1_ShearNormalized_45_window1.png	4.5	45	1	1_ShearNormalized	3	TRUE	heatmap	incorrect	FALSE
164	5356733c-651a-11e9-84e5-44a84224eb5b	1	1	topics5_12St_FiberTapSt_MCE_1_ShearNormalized_41_window1.png	topics5_12St_FiberConstSt_MCE_1_ShearNormalized_41_window1.png	topics5_12St_FiberNomSt_DBE_1_ShearNormalized_41_window1.png	3.64	41	1	1_ShearNormalized	4	FALSE	topic	correct	TRUE
165	5356733c-651a-11e9-84e5-44a84224eb5b	2	2	topics5_12St_FiberConstSt_Serv_1_ShearNormalized_20_window1.png	topics5_12St_FiberTapSt_DBE_1_ShearNormalized_20_window1.png	topics5_12St_FiberNomSt_Serv_1_ShearNormalized_20_window1.png	2.61	20	1	1_ShearNormalized	2	FALSE	topic	correct	TRUE
166	5356733c-651a-11e9-84e5-44a84224eb5b	2	2	signals12St_BHinge_DBE_1_ShearNormalized_37_window0.png	signals12St_FiberTapSt_DBE_1_ShearNormalized_37_window0.png	signals12St_BHinge_MCE_1_ShearNormalized_37_window0.png	4.3	37	0	1_ShearNormalized	1	TRUE	heatmap	correct	TRUE
167	5356733c-651a-11e9-84e5-44a84224eb5b	1	1	signals12St_FiberConstSt_Serv_1_ShearNormalized_41_window1.png	signals12St_FiberTapSt_Serv_1_ShearNormalized_41_window1.png	signals12St_FiberNomSt_DBE_1_ShearNormalized_41_window1.png	2.69	41	1	1_ShearNormalized	2	TRUE	heatmap	correct	TRUE
168	5356733c-651a-11e9-84e5-44a84224eb5b	1	1	signals12St_FiberNomSt_Serv_1_ShearNormalized_26_window2.png	signals12St_FiberTapSt_Serv_1_ShearNormalized_26_window2.png	signals12St_FiberConstSt_MCE_1_ShearNormalized_26_window2.png	3.58	26	2	1_ShearNormalized	2	TRUE	heatmap	correct	TRUE
169	5356733c-651a-11e9-84e5-44a84224eb5b	2	2	topics5_12St_FiberConstSt_Serv_1_ShearNormalized_41_window1.png	topics5_12St_FiberNomSt_DBE_1_ShearNormalized_41_window1.png	topics5_12St_FiberTapSt_Serv_1_ShearNormalized_41_window1.png	2.15	41	1	1_ShearNormalized	2	FALSE	topic	correct	TRUE
170	5356733c-651a-11e9-84e5-44a84224eb5b	1	1	signals12St_FiberNomSt_Serv_1_ShearNormalized_18_window1.png	signals12St_FiberConstSt_Serv_1_ShearNormalized_18_window1.png	signals12St_FiberTapSt_MCE_1_ShearNormalized_18_window1.png	2.8	18	1	1_ShearNormalized	2	TRUE	heatmap	correct	TRUE
171	6691ca28-651f-11e9-b4ca-44a84224eb5b	2	1	topics5_12St_BHinge_Serv_1_ShearNormalized_41_window1.png	topics5_12St_FiberTapSt_Serv_1_ShearNormalized_41_window1.png	topics5_12St_BHinge_DBE_1_ShearNormalized_41_window1.png	14.93	41	1	1_ShearNormalized	3	FALSE	topic	incorrect	FALSE
172	6691ca28-651f-11e9-b4ca-44a84224eb5b	2	2	signals12St_FiberTapSt_MCE_1_ShearNormalized_28_window1.png	signals12St_FiberNomSt_DBE_1_ShearNormalized_28_window1.png	signals12St_FiberConstSt_MCE_1_ShearNormalized_28_window1.png	7.96	28	1	1_ShearNormalized	4	TRUE	heatmap	correct	TRUE
173	6691ca28-651f-11e9-b4ca-44a84224eb5b	1	1	topics5_12St_BHinge_DBE_1_ShearNormalized_21_window1.png	topics5_12St_BHinge_MCE_1_ShearNormalized_21_window1.png	topics5_12St_FiberNomSt_DBE_1_ShearNormalized_21_window1.png	8.75	21	1	1_ShearNormalized	1	FALSE	topic	correct	TRUE
174	6691ca28-651f-11e9-b4ca-44a84224eb5b	1	1	signals12St_BHinge_Serv_1_ShearNormalized_50_window0.png	signals12St_BHinge_DBE_1_ShearNormalized_50_window0.png	signals12St_FiberConstSt_Serv_1_ShearNormalized_50_window0.png	3.27	50	0	1_ShearNormalized	3	TRUE	heatmap	correct	TRUE
175	6691ca28-651f-11e9-b4ca-44a84224eb5b	1	1	topics5_12St_FiberNomSt_MCE_1_ShearNormalized_37_window0.png	topics5_12St_FiberConstSt_MCE_1_ShearNormalized_37_window0.png	topics5_12St_FiberTapSt_DBE_1_ShearNormalized_37_window0.png	9.08	37	0	1_ShearNormalized	4	FALSE	topic	correct	TRUE
176	6691ca28-651f-11e9-b4ca-44a84224eb5b	2	1	topics5_12St_BHinge_DBE_1_ShearNormalized_49_window1.png	topics5_12St_FiberConstSt_DBE_1_ShearNormalized_49_window1.png	topics5_12St_BHinge_Serv_1_ShearNormalized_49_window1.png	9.29	49	1	1_ShearNormalized	3	FALSE	topic	incorrect	FALSE
177	6691ca28-651f-11e9-b4ca-44a84224eb5b	1	1	topics5_12St_FiberTapSt_MCE_1_ShearNormalized_28_window1.png	topics5_12St_FiberConstSt_MCE_1_ShearNormalized_28_window1.png	topics5_12St_FiberNomSt_DBE_1_ShearNormalized_28_window1.png	14.96	28	1	1_ShearNormalized	4	FALSE	topic	correct	TRUE
178	6691ca28-651f-11e9-b4ca-44a84224eb5b	2	2	signals12St_BHinge_MCE_1_ShearNormalized_36_window2.png	signals12St_FiberNomSt_MCE_1_ShearNormalized_36_window2.png	signals12St_BHinge_MCE_1_ShearNormalized_36_window2.png	6.23	36	2	1_ShearNormalized	0	TRUE	heatmap	correct	TRUE
179	6691ca28-651f-11e9-b4ca-44a84224eb5b	1	1	topics5_12St_FiberTapSt_MCE_1_ShearNormalized_11_window1.png	topics5_12St_FiberNomSt_MCE_1_ShearNormalized_11_window1.png	topics5_12St_FiberConstSt_DBE_1_ShearNormalized_11_window1.png	8.85	11	1	1_ShearNormalized	4	FALSE	topic	correct	TRUE
180	6691ca28-651f-11e9-b4ca-44a84224eb5b	2	2	topics5_12St_BHinge_Serv_1_ShearNormalized_50_window0.png	topics5_12St_FiberConstSt_Serv_1_ShearNormalized_50_window0.png	topics5_12St_BHinge_DBE_1_ShearNormalized_50_window0.png	12.98	50	0	1_ShearNormalized	3	FALSE	topic	correct	TRUE
181	6691ca28-651f-11e9-b4ca-44a84224eb5b	2	2	signals12St_BHinge_DBE_1_ShearNormalized_40_window2.png	signals12St_FiberNomSt_DBE_1_ShearNormalized_40_window2.png	signals12St_BHinge_MCE_1_ShearNormalized_40_window2.png	2.93	40	2	1_ShearNormalized	1	TRUE	heatmap	correct	TRUE
182	6691ca28-651f-11e9-b4ca-44a84224eb5b	1	1	topics5_12St_BHinge_MCE_1_ShearNormalized_09_window0.png	topics5_12St_BHinge_DBE_1_ShearNormalized_09_window0.png	topics5_12St_FiberConstSt_MCE_1_ShearNormalized_09_window0.png	3.51	9	0	1_ShearNormalized	1	FALSE	topic	correct	TRUE
183	6691ca28-651f-11e9-b4ca-44a84224eb5b	1	2	topics5_12St_BHinge_DBE_1_ShearNormalized_03_window1.png	topics5_12St_BHinge_MCE_1_ShearNormalized_03_window1.png	topics5_12St_FiberNomSt_DBE_1_ShearNormalized_03_window1.png	15.1	3	1	1_ShearNormalized	1	FALSE	topic	incorrect	FALSE
184	6691ca28-651f-11e9-b4ca-44a84224eb5b	1	1	topics5_12St_FiberConstSt_MCE_1_ShearNormalized_50_window0.png	topics5_12St_FiberTapSt_MCE_1_ShearNormalized_50_window0.png	topics5_12St_FiberNomSt_DBE_1_ShearNormalized_50_window0.png	8.43	50	0	1_ShearNormalized	4	FALSE	topic	correct	TRUE
185	6691ca28-651f-11e9-b4ca-44a84224eb5b	2	2	signals12St_FiberTapSt_MCE_1_ShearNormalized_11_window1.png	signals12St_FiberConstSt_DBE_1_ShearNormalized_11_window1.png	signals12St_FiberNomSt_MCE_1_ShearNormalized_11_window1.png	10.16	11	1	1_ShearNormalized	4	TRUE	heatmap	correct	TRUE
186	6691ca28-651f-11e9-b4ca-44a84224eb5b	1	1	topics5_12St_FiberConstSt_MCE_1_ShearNormalized_12_window0.png	topics5_12St_FiberTapSt_MCE_1_ShearNormalized_12_window0.png	topics5_12St_FiberNomSt_DBE_1_ShearNormalized_12_window0.png	4.22	12	0	1_ShearNormalized	4	FALSE	topic	correct	TRUE
187	6691ca28-651f-11e9-b4ca-44a84224eb5b	2	2	signals12St_FiberConstSt_MCE_1_ShearNormalized_12_window0.png	signals12St_FiberNomSt_DBE_1_ShearNormalized_12_window0.png	signals12St_FiberTapSt_MCE_1_ShearNormalized_12_window0.png	9.61	12	0	1_ShearNormalized	4	TRUE	heatmap	correct	TRUE
188	6691ca28-651f-11e9-b4ca-44a84224eb5b	2	2	signals12St_BHinge_MCE_1_ShearNormalized_03_window1.png	signals12St_FiberTapSt_MCE_1_ShearNormalized_03_window1.png	signals12St_BHinge_MCE_1_ShearNormalized_03_window1.png	6.61	3	1	1_ShearNormalized	0	TRUE	heatmap	correct	TRUE
189	6691ca28-651f-11e9-b4ca-44a84224eb5b	2	1	signals12St_BHinge_DBE_1_ShearNormalized_03_window1.png	signals12St_FiberNomSt_DBE_1_ShearNormalized_03_window1.png	signals12St_BHinge_MCE_1_ShearNormalized_03_window1.png	14	3	1	1_ShearNormalized	1	TRUE	heatmap	incorrect	FALSE
190	6691ca28-651f-11e9-b4ca-44a84224eb5b	2	1	signals12St_FiberNomSt_MCE_1_ShearNormalized_37_window0.png	signals12St_FiberTapSt_DBE_1_ShearNormalized_37_window0.png	signals12St_FiberConstSt_MCE_1_ShearNormalized_37_window0.png	5.1	37	0	1_ShearNormalized	4	TRUE	heatmap	incorrect	FALSE
191	6691ca28-651f-11e9-b4ca-44a84224eb5b	2	1	topics5_12St_BHinge_Serv_1_ShearNormalized_39_window1.png	topics5_12St_FiberConstSt_Serv_1_ShearNormalized_39_window1.png	topics5_12St_BHinge_DBE_1_ShearNormalized_39_window1.png	14.81	39	1	1_ShearNormalized	3	FALSE	topic	incorrect	FALSE
192	6691ca28-651f-11e9-b4ca-44a84224eb5b	1	2	topics5_12St_BHinge_DBE_1_ShearNormalized_11_window0.png	topics5_12St_BHinge_MCE_1_ShearNormalized_11_window0.png	topics5_12St_FiberTapSt_DBE_1_ShearNormalized_11_window0.png	10.57	11	0	1_ShearNormalized	1	FALSE	topic	incorrect	FALSE
193	6691ca28-651f-11e9-b4ca-44a84224eb5b	1	2	signals12St_BHinge_DBE_1_ShearNormalized_24_window1.png	signals12St_BHinge_Serv_1_ShearNormalized_24_window1.png	signals12St_FiberConstSt_DBE_1_ShearNormalized_24_window1.png	3.44	24	1	1_ShearNormalized	3	TRUE	heatmap	incorrect	FALSE
194	6691ca28-651f-11e9-b4ca-44a84224eb5b	1	1	topics5_12St_BHinge_MCE_1_ShearNormalized_36_window2.png	topics5_12St_BHinge_MCE_1_ShearNormalized_36_window2.png	topics5_12St_FiberNomSt_MCE_1_ShearNormalized_36_window2.png	2.54	36	2	1_ShearNormalized	0	FALSE	topic	correct	TRUE
195	6691ca28-651f-11e9-b4ca-44a84224eb5b	1	2	signals12St_BHinge_Serv_1_ShearNormalized_41_window1.png	signals12St_BHinge_DBE_1_ShearNormalized_41_window1.png	signals12St_FiberTapSt_Serv_1_ShearNormalized_41_window1.png	11.19	41	1	1_ShearNormalized	3	TRUE	heatmap	incorrect	FALSE
196	6691ca28-651f-11e9-b4ca-44a84224eb5b	2	2	topics5_12St_BHinge_DBE_1_ShearNormalized_24_window1.png	topics5_12St_FiberConstSt_DBE_1_ShearNormalized_24_window1.png	topics5_12St_BHinge_Serv_1_ShearNormalized_24_window1.png	8.38	24	1	1_ShearNormalized	3	FALSE	topic	correct	TRUE
197	6691ca28-651f-11e9-b4ca-44a84224eb5b	2	2	signals12St_BHinge_MCE_1_ShearNormalized_09_window0.png	signals12St_FiberConstSt_MCE_1_ShearNormalized_09_window0.png	signals12St_BHinge_DBE_1_ShearNormalized_09_window0.png	6.97	9	0	1_ShearNormalized	1	TRUE	heatmap	correct	TRUE
198	6691ca28-651f-11e9-b4ca-44a84224eb5b	1	2	topics5_12St_BHinge_DBE_1_ShearNormalized_40_window2.png	topics5_12St_BHinge_MCE_1_ShearNormalized_40_window2.png	topics5_12St_FiberNomSt_DBE_1_ShearNormalized_40_window2.png	9.81	40	2	1_ShearNormalized	1	FALSE	topic	incorrect	FALSE
199	6691ca28-651f-11e9-b4ca-44a84224eb5b	2	2	signals12St_FiberConstSt_MCE_1_ShearNormalized_50_window0.png	signals12St_FiberNomSt_DBE_1_ShearNormalized_50_window0.png	signals12St_FiberTapSt_MCE_1_ShearNormalized_50_window0.png	9.45	50	0	1_ShearNormalized	4	TRUE	heatmap	correct	TRUE
200	6691ca28-651f-11e9-b4ca-44a84224eb5b	2	2	signals12St_BHinge_DBE_1_ShearNormalized_21_window1.png	signals12St_FiberNomSt_DBE_1_ShearNormalized_21_window1.png	signals12St_BHinge_MCE_1_ShearNormalized_21_window1.png	9.84	21	1	1_ShearNormalized	1	TRUE	heatmap	correct	TRUE
201	6691ca28-651f-11e9-b4ca-44a84224eb5b	1	2	signals12St_BHinge_DBE_1_ShearNormalized_49_window1.png	signals12St_BHinge_Serv_1_ShearNormalized_49_window1.png	signals12St_FiberConstSt_DBE_1_ShearNormalized_49_window1.png	6.91	49	1	1_ShearNormalized	3	TRUE	heatmap	incorrect	FALSE
202	6691ca28-651f-11e9-b4ca-44a84224eb5b	1	2	signals12St_BHinge_Serv_1_ShearNormalized_39_window1.png	signals12St_BHinge_DBE_1_ShearNormalized_39_window1.png	signals12St_FiberConstSt_Serv_1_ShearNormalized_39_window1.png	6.59	39	1	1_ShearNormalized	3	TRUE	heatmap	incorrect	FALSE
203	6691ca28-651f-11e9-b4ca-44a84224eb5b	1	1	topics5_12St_BHinge_MCE_1_ShearNormalized_03_window1.png	topics5_12St_BHinge_MCE_1_ShearNormalized_03_window1.png	topics5_12St_FiberTapSt_MCE_1_ShearNormalized_03_window1.png	3.42	3	1	1_ShearNormalized	0	FALSE	topic	correct	TRUE
204	6691ca28-651f-11e9-b4ca-44a84224eb5b	2	2	signals12St_BHinge_DBE_1_ShearNormalized_11_window0.png	signals12St_FiberTapSt_DBE_1_ShearNormalized_11_window0.png	signals12St_BHinge_MCE_1_ShearNormalized_11_window0.png	3.93	11	0	1_ShearNormalized	1	TRUE	heatmap	correct	TRUE
205	669396ba-6226-11e9-9d7d-784f43628f47	1	1	signals12St_FiberConstSt_Serv_1_ShearNormalized_43_window0.png	signals12St_FiberTapSt_Serv_1_ShearNormalized_43_window0.png	signals12St_FiberNomSt_DBE_1_ShearNormalized_43_window0.png	3.27	43	0	1_ShearNormalized	2	TRUE	heatmap	correct	TRUE
206	669396ba-6226-11e9-9d7d-784f43628f47	2	1	signals12St_FiberNomSt_MCE_1_ShearNormalized_14_window1.png	signals12St_FiberConstSt_DBE_1_ShearNormalized_14_window1.png	signals12St_FiberTapSt_MCE_1_ShearNormalized_14_window1.png	2.35	14	1	1_ShearNormalized	4	TRUE	heatmap	incorrect	FALSE
207	669396ba-6226-11e9-9d7d-784f43628f47	2	2	topics5_12St_BHinge_MCE_1_ShearNormalized_02_window0.png	topics5_12St_FiberTapSt_MCE_1_ShearNormalized_02_window0.png	topics5_12St_BHinge_Serv_1_ShearNormalized_02_window0.png	4.9	2	0	1_ShearNormalized	3	FALSE	topic	correct	TRUE
208	669396ba-6226-11e9-9d7d-784f43628f47	2	2	signals12St_FiberTapSt_MCE_1_ShearNormalized_48_window2.png	signals12St_FiberNomSt_DBE_1_ShearNormalized_48_window2.png	signals12St_FiberConstSt_MCE_1_ShearNormalized_48_window2.png	2.53	48	2	1_ShearNormalized	4	TRUE	heatmap	correct	TRUE
209	669396ba-6226-11e9-9d7d-784f43628f47	2	1	topics5_12St_BHinge_DBE_1_ShearNormalized_15_window0.png	topics5_12St_FiberTapSt_DBE_1_ShearNormalized_15_window0.png	topics5_12St_BHinge_Serv_1_ShearNormalized_15_window0.png	4.49	15	0	1_ShearNormalized	3	FALSE	topic	incorrect	FALSE
210	669396ba-6226-11e9-9d7d-784f43628f47	2	2	signals12St_BHinge_MCE_1_ShearNormalized_05_window1.png	signals12St_FiberNomSt_MCE_1_ShearNormalized_05_window1.png	signals12St_BHinge_MCE_1_ShearNormalized_05_window1.png	2.42	5	1	1_ShearNormalized	0	TRUE	heatmap	correct	TRUE
211	669396ba-6226-11e9-9d7d-784f43628f47	1	1	topics5_12St_BHinge_MCE_1_ShearNormalized_17_window1.png	topics5_12St_BHinge_MCE_1_ShearNormalized_17_window1.png	topics5_12St_FiberNomSt_MCE_1_ShearNormalized_17_window1.png	1.48	17	1	1_ShearNormalized	0	FALSE	topic	correct	TRUE
212	669396ba-6226-11e9-9d7d-784f43628f47	1	2	signals12St_BHinge_MCE_1_ShearNormalized_39_window1.png	signals12St_BHinge_Serv_1_ShearNormalized_39_window1.png	signals12St_FiberTapSt_MCE_1_ShearNormalized_39_window1.png	2.28	39	1	1_ShearNormalized	3	TRUE	heatmap	incorrect	FALSE
213	669396ba-6226-11e9-9d7d-784f43628f47	1	1	signals12St_FiberTapSt_Serv_1_ShearNormalized_12_window0.png	signals12St_FiberNomSt_Serv_1_ShearNormalized_12_window0.png	signals12St_FiberConstSt_MCE_1_ShearNormalized_12_window0.png	2.35	12	0	1_ShearNormalized	2	TRUE	heatmap	correct	TRUE
214	669396ba-6226-11e9-9d7d-784f43628f47	2	1	topics5_12St_BHinge_DBE_1_ShearNormalized_35_window1.png	topics5_12St_FiberNomSt_DBE_1_ShearNormalized_35_window1.png	topics5_12St_BHinge_Serv_1_ShearNormalized_35_window1.png	2.72	35	1	1_ShearNormalized	3	FALSE	topic	incorrect	FALSE
215	669396ba-6226-11e9-9d7d-784f43628f47	1	2	signals12St_BHinge_DBE_1_ShearNormalized_35_window1.png	signals12St_BHinge_Serv_1_ShearNormalized_35_window1.png	signals12St_FiberNomSt_DBE_1_ShearNormalized_35_window1.png	1.65	35	1	1_ShearNormalized	3	TRUE	heatmap	incorrect	FALSE
216	669396ba-6226-11e9-9d7d-784f43628f47	1	1	topics5_12St_FiberConstSt_MCE_1_ShearNormalized_06_window0.png	topics5_12St_FiberTapSt_MCE_1_ShearNormalized_06_window0.png	topics5_12St_FiberNomSt_DBE_1_ShearNormalized_06_window0.png	5.1	6	0	1_ShearNormalized	4	FALSE	topic	correct	TRUE
217	669396ba-6226-11e9-9d7d-784f43628f47	1	1	signals12St_BHinge_Serv_1_ShearNormalized_29_window1.png	signals12St_BHinge_DBE_1_ShearNormalized_29_window1.png	signals12St_FiberTapSt_Serv_1_ShearNormalized_29_window1.png	2.13	29	1	1_ShearNormalized	3	TRUE	heatmap	correct	TRUE
218	669396ba-6226-11e9-9d7d-784f43628f47	1	2	signals12St_BHinge_Serv_1_ShearNormalized_09_window1.png	signals12St_BHinge_MCE_1_ShearNormalized_09_window1.png	signals12St_FiberNomSt_Serv_1_ShearNormalized_09_window1.png	1.69	9	1	1_ShearNormalized	3	TRUE	heatmap	incorrect	FALSE
219	669396ba-6226-11e9-9d7d-784f43628f47	1	1	topics5_12St_BHinge_DBE_1_ShearNormalized_01_window0.png	topics5_12St_BHinge_MCE_1_ShearNormalized_01_window0.png	topics5_12St_FiberTapSt_DBE_1_ShearNormalized_01_window0.png	1.5	1	0	1_ShearNormalized	1	FALSE	topic	correct	TRUE
220	669396ba-6226-11e9-9d7d-784f43628f47	1	1	topics5_12St_BHinge_MCE_1_ShearNormalized_05_window1.png	topics5_12St_BHinge_MCE_1_ShearNormalized_05_window1.png	topics5_12St_FiberNomSt_MCE_1_ShearNormalized_05_window1.png	1.31	5	1	1_ShearNormalized	0	FALSE	topic	correct	TRUE
221	669396ba-6226-11e9-9d7d-784f43628f47	1	1	topics5_12St_FiberTapSt_MCE_1_ShearNormalized_19_window1.png	topics5_12St_FiberNomSt_MCE_1_ShearNormalized_19_window1.png	topics5_12St_FiberConstSt_DBE_1_ShearNormalized_19_window1.png	1.99	19	1	1_ShearNormalized	4	FALSE	topic	correct	TRUE
222	669396ba-6226-11e9-9d7d-784f43628f47	2	2	topics5_12St_BHinge_Serv_1_ShearNormalized_09_window1.png	topics5_12St_FiberNomSt_Serv_1_ShearNormalized_09_window1.png	topics5_12St_BHinge_MCE_1_ShearNormalized_09_window1.png	2.28	9	1	1_ShearNormalized	3	FALSE	topic	correct	TRUE
223	669396ba-6226-11e9-9d7d-784f43628f47	1	1	topics5_12St_FiberConstSt_MCE_1_ShearNormalized_02_window0.png	topics5_12St_FiberNomSt_MCE_1_ShearNormalized_02_window0.png	topics5_12St_FiberTapSt_DBE_1_ShearNormalized_02_window0.png	3.15	2	0	1_ShearNormalized	4	FALSE	topic	correct	TRUE
224	669396ba-6226-11e9-9d7d-784f43628f47	2	1	topics5_12St_BHinge_Serv_1_ShearNormalized_29_window1.png	topics5_12St_FiberTapSt_Serv_1_ShearNormalized_29_window1.png	topics5_12St_BHinge_DBE_1_ShearNormalized_29_window1.png	4.62	29	1	1_ShearNormalized	3	FALSE	topic	incorrect	FALSE
225	669396ba-6226-11e9-9d7d-784f43628f47	2	1	topics5_12St_BHinge_MCE_1_ShearNormalized_39_window1.png	topics5_12St_FiberTapSt_MCE_1_ShearNormalized_39_window1.png	topics5_12St_BHinge_Serv_1_ShearNormalized_39_window1.png	3.51	39	1	1_ShearNormalized	3	FALSE	topic	incorrect	FALSE
226	669396ba-6226-11e9-9d7d-784f43628f47	2	2	topics5_12St_FiberTapSt_Serv_1_ShearNormalized_12_window0.png	topics5_12St_FiberConstSt_MCE_1_ShearNormalized_12_window0.png	topics5_12St_FiberNomSt_Serv_1_ShearNormalized_12_window0.png	1.74	12	0	1_ShearNormalized	2	FALSE	topic	correct	TRUE
227	669396ba-6226-11e9-9d7d-784f43628f47	1	1	topics5_12St_FiberConstSt_MCE_1_ShearNormalized_18_window2.png	topics5_12St_FiberNomSt_MCE_1_ShearNormalized_18_window2.png	topics5_12St_FiberTapSt_DBE_1_ShearNormalized_18_window2.png	1.22	18	2	1_ShearNormalized	4	FALSE	topic	correct	TRUE
228	669396ba-6226-11e9-9d7d-784f43628f47	2	1	signals12St_FiberConstSt_MCE_1_ShearNormalized_02_window0.png	signals12St_FiberTapSt_DBE_1_ShearNormalized_02_window0.png	signals12St_FiberNomSt_MCE_1_ShearNormalized_02_window0.png	2.84	2	0	1_ShearNormalized	4	TRUE	heatmap	incorrect	FALSE
229	669396ba-6226-11e9-9d7d-784f43628f47	2	2	signals12St_FiberConstSt_MCE_1_ShearNormalized_06_window0.png	signals12St_FiberNomSt_DBE_1_ShearNormalized_06_window0.png	signals12St_FiberTapSt_MCE_1_ShearNormalized_06_window0.png	1.99	6	0	1_ShearNormalized	4	TRUE	heatmap	correct	TRUE
230	669396ba-6226-11e9-9d7d-784f43628f47	2	2	signals12St_FiberConstSt_MCE_1_ShearNormalized_18_window2.png	signals12St_FiberTapSt_DBE_1_ShearNormalized_18_window2.png	signals12St_FiberNomSt_MCE_1_ShearNormalized_18_window2.png	2.72	18	2	1_ShearNormalized	4	TRUE	heatmap	correct	TRUE
231	669396ba-6226-11e9-9d7d-784f43628f47	1	1	topics5_12St_FiberNomSt_MCE_1_ShearNormalized_14_window1.png	topics5_12St_FiberTapSt_MCE_1_ShearNormalized_14_window1.png	topics5_12St_FiberConstSt_DBE_1_ShearNormalized_14_window1.png	2.04	14	1	1_ShearNormalized	4	FALSE	topic	correct	TRUE
232	669396ba-6226-11e9-9d7d-784f43628f47	1	2	signals12St_BHinge_DBE_1_ShearNormalized_15_window0.png	signals12St_BHinge_Serv_1_ShearNormalized_15_window0.png	signals12St_FiberTapSt_DBE_1_ShearNormalized_15_window0.png	1.67	15	0	1_ShearNormalized	3	TRUE	heatmap	incorrect	FALSE
233	669396ba-6226-11e9-9d7d-784f43628f47	1	1	topics5_12St_FiberTapSt_MCE_1_ShearNormalized_48_window2.png	topics5_12St_FiberConstSt_MCE_1_ShearNormalized_48_window2.png	topics5_12St_FiberNomSt_DBE_1_ShearNormalized_48_window2.png	1.6	48	2	1_ShearNormalized	4	FALSE	topic	correct	TRUE
234	669396ba-6226-11e9-9d7d-784f43628f47	2	2	topics5_12St_FiberConstSt_Serv_1_ShearNormalized_43_window0.png	topics5_12St_FiberNomSt_DBE_1_ShearNormalized_43_window0.png	topics5_12St_FiberTapSt_Serv_1_ShearNormalized_43_window0.png	1.38	43	0	1_ShearNormalized	2	FALSE	topic	correct	TRUE
235	669396ba-6226-11e9-9d7d-784f43628f47	2	2	signals12St_BHinge_MCE_1_ShearNormalized_17_window1.png	signals12St_FiberNomSt_MCE_1_ShearNormalized_17_window1.png	signals12St_BHinge_MCE_1_ShearNormalized_17_window1.png	4.1	17	1	1_ShearNormalized	0	TRUE	heatmap	correct	TRUE
236	669396ba-6226-11e9-9d7d-784f43628f47	2	2	signals12St_BHinge_DBE_1_ShearNormalized_01_window0.png	signals12St_FiberTapSt_DBE_1_ShearNormalized_01_window0.png	signals12St_BHinge_MCE_1_ShearNormalized_01_window0.png	2.19	1	0	1_ShearNormalized	1	TRUE	heatmap	correct	TRUE
237	669396ba-6226-11e9-9d7d-784f43628f47	2	2	signals12St_FiberTapSt_MCE_1_ShearNormalized_19_window1.png	signals12St_FiberConstSt_DBE_1_ShearNormalized_19_window1.png	signals12St_FiberNomSt_MCE_1_ShearNormalized_19_window1.png	2.63	19	1	1_ShearNormalized	4	TRUE	heatmap	correct	TRUE
238	669396ba-6226-11e9-9d7d-784f43628f47	1	1	signals12St_BHinge_MCE_1_ShearNormalized_02_window0.png	signals12St_BHinge_Serv_1_ShearNormalized_02_window0.png	signals12St_FiberTapSt_MCE_1_ShearNormalized_02_window0.png	6.24	2	0	1_ShearNormalized	3	TRUE	heatmap	correct	TRUE
239	6ada509c-62c6-11e9-abd0-44a84224eb5b	1	1	topics5_12St_BHinge_DBE_1_ShearNormalized_07_window2.png	topics5_12St_BHinge_DBE_1_ShearNormalized_07_window2.png	topics5_12St_FiberNomSt_DBE_1_ShearNormalized_07_window2.png	1.6	7	2	1_ShearNormalized	0	FALSE	topic	correct	TRUE
240	6ada509c-62c6-11e9-abd0-44a84224eb5b	2	1	topics5_12St_BHinge_DBE_1_ShearNormalized_26_window2.png	topics5_12St_FiberTapSt_DBE_1_ShearNormalized_26_window2.png	topics5_12St_BHinge_Serv_1_ShearNormalized_26_window2.png	4.51	26	2	1_ShearNormalized	3	FALSE	topic	incorrect	FALSE
241	6ada509c-62c6-11e9-abd0-44a84224eb5b	1	1	topics5_12St_FiberNomSt_MCE_1_ShearNormalized_23_window2.png	topics5_12St_FiberConstSt_MCE_1_ShearNormalized_23_window2.png	topics5_12St_FiberTapSt_DBE_1_ShearNormalized_23_window2.png	2.95	23	2	1_ShearNormalized	4	FALSE	topic	correct	TRUE
242	6ada509c-62c6-11e9-abd0-44a84224eb5b	1	1	topics5_12St_FiberNomSt_MCE_1_ShearNormalized_07_window2.png	topics5_12St_FiberConstSt_MCE_1_ShearNormalized_07_window2.png	topics5_12St_FiberTapSt_DBE_1_ShearNormalized_07_window2.png	2.6	7	2	1_ShearNormalized	4	FALSE	topic	correct	TRUE
243	6ada509c-62c6-11e9-abd0-44a84224eb5b	1	1	signals12St_FiberConstSt_Serv_1_ShearNormalized_36_window1.png	signals12St_FiberNomSt_Serv_1_ShearNormalized_36_window1.png	signals12St_FiberTapSt_MCE_1_ShearNormalized_36_window1.png	1.73	36	1	1_ShearNormalized	2	TRUE	heatmap	correct	TRUE
244	6ada509c-62c6-11e9-abd0-44a84224eb5b	1	1	topics5_12St_BHinge_DBE_1_ShearNormalized_41_window2.png	topics5_12St_BHinge_MCE_1_ShearNormalized_41_window2.png	topics5_12St_FiberConstSt_DBE_1_ShearNormalized_41_window2.png	1.14	41	2	1_ShearNormalized	1	FALSE	topic	correct	TRUE
245	6ada509c-62c6-11e9-abd0-44a84224eb5b	2	2	signals12St_FiberConstSt_MCE_1_ShearNormalized_31_window1.png	signals12St_FiberNomSt_DBE_1_ShearNormalized_31_window1.png	signals12St_FiberTapSt_MCE_1_ShearNormalized_31_window1.png	2.73	31	1	1_ShearNormalized	4	TRUE	heatmap	correct	TRUE
246	6ada509c-62c6-11e9-abd0-44a84224eb5b	1	1	topics5_12St_BHinge_DBE_1_ShearNormalized_12_window2.png	topics5_12St_BHinge_DBE_1_ShearNormalized_12_window2.png	topics5_12St_FiberNomSt_DBE_1_ShearNormalized_12_window2.png	1.77	12	2	1_ShearNormalized	0	FALSE	topic	correct	TRUE
247	6ada509c-62c6-11e9-abd0-44a84224eb5b	2	2	signals12St_FiberNomSt_MCE_1_ShearNormalized_07_window2.png	signals12St_FiberTapSt_DBE_1_ShearNormalized_07_window2.png	signals12St_FiberConstSt_MCE_1_ShearNormalized_07_window2.png	1.9	7	2	1_ShearNormalized	4	TRUE	heatmap	correct	TRUE
248	6ada509c-62c6-11e9-abd0-44a84224eb5b	1	1	topics5_12St_BHinge_DBE_1_ShearNormalized_20_window1.png	topics5_12St_BHinge_MCE_1_ShearNormalized_20_window1.png	topics5_12St_FiberConstSt_DBE_1_ShearNormalized_20_window1.png	1.4	20	1	1_ShearNormalized	1	FALSE	topic	correct	TRUE
249	6ada509c-62c6-11e9-abd0-44a84224eb5b	2	1	signals12St_FiberConstSt_MCE_1_ShearNormalized_20_window1.png	signals12St_FiberTapSt_DBE_1_ShearNormalized_20_window1.png	signals12St_FiberNomSt_MCE_1_ShearNormalized_20_window1.png	3	20	1	1_ShearNormalized	4	TRUE	heatmap	incorrect	FALSE
250	6ada509c-62c6-11e9-abd0-44a84224eb5b	1	2	signals12St_BHinge_MCE_1_ShearNormalized_06_window1.png	signals12St_BHinge_Serv_1_ShearNormalized_06_window1.png	signals12St_FiberNomSt_MCE_1_ShearNormalized_06_window1.png	2.01	6	1	1_ShearNormalized	3	TRUE	heatmap	incorrect	FALSE
251	6ada509c-62c6-11e9-abd0-44a84224eb5b	2	2	topics5_12St_BHinge_MCE_1_ShearNormalized_09_window0.png	topics5_12St_FiberNomSt_MCE_1_ShearNormalized_09_window0.png	topics5_12St_BHinge_Serv_1_ShearNormalized_09_window0.png	3.01	9	0	1_ShearNormalized	3	FALSE	topic	correct	TRUE
252	6ada509c-62c6-11e9-abd0-44a84224eb5b	1	1	topics5_12St_FiberConstSt_MCE_1_ShearNormalized_39_window0.png	topics5_12St_FiberNomSt_MCE_1_ShearNormalized_39_window0.png	topics5_12St_FiberTapSt_DBE_1_ShearNormalized_39_window0.png	2.6	39	0	1_ShearNormalized	4	FALSE	topic	correct	TRUE
253	6ada509c-62c6-11e9-abd0-44a84224eb5b	1	1	topics5_12St_FiberConstSt_MCE_1_ShearNormalized_20_window1.png	topics5_12St_FiberNomSt_MCE_1_ShearNormalized_20_window1.png	topics5_12St_FiberTapSt_DBE_1_ShearNormalized_20_window1.png	2.57	20	1	1_ShearNormalized	4	FALSE	topic	correct	TRUE
254	6ada509c-62c6-11e9-abd0-44a84224eb5b	2	2	signals12St_BHinge_DBE_1_ShearNormalized_20_window1.png	signals12St_FiberConstSt_DBE_1_ShearNormalized_20_window1.png	signals12St_BHinge_MCE_1_ShearNormalized_20_window1.png	1.87	20	1	1_ShearNormalized	1	TRUE	heatmap	correct	TRUE
255	6ada509c-62c6-11e9-abd0-44a84224eb5b	2	1	topics5_12St_BHinge_MCE_1_ShearNormalized_06_window1.png	topics5_12St_FiberNomSt_MCE_1_ShearNormalized_06_window1.png	topics5_12St_BHinge_Serv_1_ShearNormalized_06_window1.png	2.79	6	1	1_ShearNormalized	3	FALSE	topic	incorrect	FALSE
256	6ada509c-62c6-11e9-abd0-44a84224eb5b	1	1	signals12St_BHinge_MCE_1_ShearNormalized_09_window0.png	signals12St_BHinge_Serv_1_ShearNormalized_09_window0.png	signals12St_FiberNomSt_MCE_1_ShearNormalized_09_window0.png	4.22	9	0	1_ShearNormalized	3	TRUE	heatmap	correct	TRUE
257	6ada509c-62c6-11e9-abd0-44a84224eb5b	2	1	signals12St_FiberNomSt_MCE_1_ShearNormalized_23_window2.png	signals12St_FiberTapSt_DBE_1_ShearNormalized_23_window2.png	signals12St_FiberConstSt_MCE_1_ShearNormalized_23_window2.png	3.58	23	2	1_ShearNormalized	4	TRUE	heatmap	incorrect	FALSE
258	6ada509c-62c6-11e9-abd0-44a84224eb5b	2	2	signals12St_FiberConstSt_MCE_1_ShearNormalized_39_window0.png	signals12St_FiberTapSt_DBE_1_ShearNormalized_39_window0.png	signals12St_FiberNomSt_MCE_1_ShearNormalized_39_window0.png	1.99	39	0	1_ShearNormalized	4	TRUE	heatmap	correct	TRUE
259	6ada509c-62c6-11e9-abd0-44a84224eb5b	2	1	signals12St_BHinge_DBE_1_ShearNormalized_07_window2.png	signals12St_FiberNomSt_DBE_1_ShearNormalized_07_window2.png	signals12St_BHinge_DBE_1_ShearNormalized_07_window2.png	3.44	7	2	1_ShearNormalized	0	TRUE	heatmap	incorrect	FALSE
260	6ada509c-62c6-11e9-abd0-44a84224eb5b	2	1	topics5_12St_BHinge_DBE_1_ShearNormalized_34_window2.png	topics5_12St_FiberTapSt_DBE_1_ShearNormalized_34_window2.png	topics5_12St_BHinge_Serv_1_ShearNormalized_34_window2.png	4.76	34	2	1_ShearNormalized	3	FALSE	topic	incorrect	FALSE
261	6ada509c-62c6-11e9-abd0-44a84224eb5b	1	2	signals12St_BHinge_DBE_1_ShearNormalized_26_window2.png	signals12St_BHinge_Serv_1_ShearNormalized_26_window2.png	signals12St_FiberTapSt_DBE_1_ShearNormalized_26_window2.png	1.8	26	2	1_ShearNormalized	3	TRUE	heatmap	incorrect	FALSE
262	6ada509c-62c6-11e9-abd0-44a84224eb5b	2	2	signals12St_BHinge_DBE_1_ShearNormalized_12_window2.png	signals12St_FiberNomSt_DBE_1_ShearNormalized_12_window2.png	signals12St_BHinge_DBE_1_ShearNormalized_12_window2.png	5.11	12	2	1_ShearNormalized	0	TRUE	heatmap	correct	TRUE
263	6ada509c-62c6-11e9-abd0-44a84224eb5b	2	2	topics5_12St_FiberNomSt_Serv_1_ShearNormalized_36_window2.png	topics5_12St_FiberConstSt_MCE_1_ShearNormalized_36_window2.png	topics5_12St_FiberTapSt_Serv_1_ShearNormalized_36_window2.png	1.71	36	2	1_ShearNormalized	2	FALSE	topic	correct	TRUE
264	6ada509c-62c6-11e9-abd0-44a84224eb5b	2	2	signals12St_FiberConstSt_MCE_1_ShearNormalized_07_window0.png	signals12St_FiberNomSt_DBE_1_ShearNormalized_07_window0.png	signals12St_FiberTapSt_MCE_1_ShearNormalized_07_window0.png	2.05	7	0	1_ShearNormalized	4	TRUE	heatmap	correct	TRUE
265	6ada509c-62c6-11e9-abd0-44a84224eb5b	1	2	topics5_12St_FiberConstSt_MCE_1_ShearNormalized_31_window1.png	topics5_12St_FiberTapSt_MCE_1_ShearNormalized_31_window1.png	topics5_12St_FiberNomSt_DBE_1_ShearNormalized_31_window1.png	5.89	31	1	1_ShearNormalized	4	FALSE	topic	incorrect	FALSE
266	6ada509c-62c6-11e9-abd0-44a84224eb5b	1	1	topics5_12St_FiberConstSt_MCE_1_ShearNormalized_07_window0.png	topics5_12St_FiberTapSt_MCE_1_ShearNormalized_07_window0.png	topics5_12St_FiberNomSt_DBE_1_ShearNormalized_07_window0.png	4.06	7	0	1_ShearNormalized	4	FALSE	topic	correct	TRUE
267	6ada509c-62c6-11e9-abd0-44a84224eb5b	1	1	signals12St_FiberNomSt_Serv_1_ShearNormalized_36_window2.png	signals12St_FiberTapSt_Serv_1_ShearNormalized_36_window2.png	signals12St_FiberConstSt_MCE_1_ShearNormalized_36_window2.png	1.82	36	2	1_ShearNormalized	2	TRUE	heatmap	correct	TRUE
268	6ada509c-62c6-11e9-abd0-44a84224eb5b	1	1	signals12St_BHinge_DBE_1_ShearNormalized_34_window2.png	signals12St_BHinge_Serv_1_ShearNormalized_34_window2.png	signals12St_FiberTapSt_DBE_1_ShearNormalized_34_window2.png	4.12	34	2	1_ShearNormalized	3	TRUE	heatmap	correct	TRUE
269	6ada509c-62c6-11e9-abd0-44a84224eb5b	2	2	topics5_12St_FiberConstSt_Serv_1_ShearNormalized_36_window1.png	topics5_12St_FiberTapSt_MCE_1_ShearNormalized_36_window1.png	topics5_12St_FiberNomSt_Serv_1_ShearNormalized_36_window1.png	1.89	36	1	1_ShearNormalized	2	FALSE	topic	correct	TRUE
270	6ada509c-62c6-11e9-abd0-44a84224eb5b	2	2	signals12St_BHinge_DBE_1_ShearNormalized_41_window2.png	signals12St_FiberConstSt_DBE_1_ShearNormalized_41_window2.png	signals12St_BHinge_MCE_1_ShearNormalized_41_window2.png	4.76	41	2	1_ShearNormalized	1	TRUE	heatmap	correct	TRUE
271	6ada509c-62c6-11e9-abd0-44a84224eb5b	2	2	signals12St_BHinge_DBE_1_ShearNormalized_03_window0.png	signals12St_FiberTapSt_DBE_1_ShearNormalized_03_window0.png	signals12St_BHinge_MCE_1_ShearNormalized_03_window0.png	3.78	3	0	1_ShearNormalized	1	TRUE	heatmap	correct	TRUE
272	6ada509c-62c6-11e9-abd0-44a84224eb5b	1	1	topics5_12St_BHinge_DBE_1_ShearNormalized_03_window0.png	topics5_12St_BHinge_MCE_1_ShearNormalized_03_window0.png	topics5_12St_FiberTapSt_DBE_1_ShearNormalized_03_window0.png	3.39	3	0	1_ShearNormalized	1	FALSE	topic	correct	TRUE
273	6ec59df4-6534-11e9-b188-44a84224eb5b	2	2	topics5_12St_FiberTapSt_Serv_1_ShearNormalized_09_window0.png	topics5_12St_FiberNomSt_DBE_1_ShearNormalized_09_window0.png	topics5_12St_FiberConstSt_Serv_1_ShearNormalized_09_window0.png	3.53	9	0	1_ShearNormalized	2	FALSE	topic	correct	TRUE
274	6ec59df4-6534-11e9-b188-44a84224eb5b	2	2	topics5_12St_FiberNomSt_Serv_1_ShearNormalized_07_window1.png	topics5_12St_FiberConstSt_DBE_1_ShearNormalized_07_window1.png	topics5_12St_FiberTapSt_Serv_1_ShearNormalized_07_window1.png	4.56	7	1	1_ShearNormalized	2	FALSE	topic	correct	TRUE
275	6ec59df4-6534-11e9-b188-44a84224eb5b	2	2	topics5_12St_BHinge_Serv_1_ShearNormalized_45_window1.png	topics5_12St_FiberTapSt_Serv_1_ShearNormalized_45_window1.png	topics5_12St_BHinge_DBE_1_ShearNormalized_45_window1.png	4.15	45	1	1_ShearNormalized	3	FALSE	topic	correct	TRUE
276	6ec59df4-6534-11e9-b188-44a84224eb5b	1	1	topics5_12St_BHinge_DBE_1_ShearNormalized_26_window2.png	topics5_12St_BHinge_MCE_1_ShearNormalized_26_window2.png	topics5_12St_FiberNomSt_DBE_1_ShearNormalized_26_window2.png	4.11	26	2	1_ShearNormalized	1	FALSE	topic	correct	TRUE
277	6ec59df4-6534-11e9-b188-44a84224eb5b	2	2	topics5_12St_FiberConstSt_Serv_1_ShearNormalized_42_window1.png	topics5_12St_FiberTapSt_MCE_1_ShearNormalized_42_window1.png	topics5_12St_FiberNomSt_Serv_1_ShearNormalized_42_window1.png	2.86	42	1	1_ShearNormalized	2	FALSE	topic	correct	TRUE
278	6ec59df4-6534-11e9-b188-44a84224eb5b	2	2	signals12St_BHinge_DBE_1_ShearNormalized_16_window2.png	signals12St_FiberConstSt_DBE_1_ShearNormalized_16_window2.png	signals12St_BHinge_MCE_1_ShearNormalized_16_window2.png	10.04	16	2	1_ShearNormalized	1	TRUE	heatmap	correct	TRUE
279	6ec59df4-6534-11e9-b188-44a84224eb5b	1	1	topics5_12St_FiberTapSt_MCE_1_ShearNormalized_31_window2.png	topics5_12St_FiberConstSt_MCE_1_ShearNormalized_31_window2.png	topics5_12St_FiberNomSt_DBE_1_ShearNormalized_31_window2.png	5.61	31	2	1_ShearNormalized	4	FALSE	topic	correct	TRUE
280	6ec59df4-6534-11e9-b188-44a84224eb5b	1	1	signals12St_FiberConstSt_Serv_1_ShearNormalized_42_window1.png	signals12St_FiberNomSt_Serv_1_ShearNormalized_42_window1.png	signals12St_FiberTapSt_MCE_1_ShearNormalized_42_window1.png	3.02	42	1	1_ShearNormalized	2	TRUE	heatmap	correct	TRUE
281	6ec59df4-6534-11e9-b188-44a84224eb5b	1	1	topics5_12St_FiberNomSt_MCE_1_ShearNormalized_17_window0.png	topics5_12St_FiberConstSt_MCE_1_ShearNormalized_17_window0.png	topics5_12St_FiberTapSt_DBE_1_ShearNormalized_17_window0.png	3.14	17	0	1_ShearNormalized	4	FALSE	topic	correct	TRUE
282	6ec59df4-6534-11e9-b188-44a84224eb5b	1	2	signals12St_FiberTapSt_Serv_1_ShearNormalized_09_window0.png	signals12St_FiberConstSt_Serv_1_ShearNormalized_09_window0.png	signals12St_FiberNomSt_DBE_1_ShearNormalized_09_window0.png	10.42	9	0	1_ShearNormalized	2	TRUE	heatmap	incorrect	FALSE
283	6ec59df4-6534-11e9-b188-44a84224eb5b	2	2	signals12St_BHinge_DBE_1_ShearNormalized_26_window2.png	signals12St_FiberNomSt_DBE_1_ShearNormalized_26_window2.png	signals12St_BHinge_MCE_1_ShearNormalized_26_window2.png	5.19	26	2	1_ShearNormalized	1	TRUE	heatmap	correct	TRUE
284	6ec59df4-6534-11e9-b188-44a84224eb5b	2	2	signals12St_FiberNomSt_MCE_1_ShearNormalized_05_window1.png	signals12St_FiberTapSt_DBE_1_ShearNormalized_05_window1.png	signals12St_FiberConstSt_MCE_1_ShearNormalized_05_window1.png	9.32	5	1	1_ShearNormalized	4	TRUE	heatmap	correct	TRUE
285	6ec59df4-6534-11e9-b188-44a84224eb5b	2	2	signals12St_BHinge_MCE_1_ShearNormalized_42_window1.png	signals12St_FiberConstSt_MCE_1_ShearNormalized_42_window1.png	signals12St_BHinge_MCE_1_ShearNormalized_42_window1.png	5.25	42	1	1_ShearNormalized	0	TRUE	heatmap	correct	TRUE
286	6ec59df4-6534-11e9-b188-44a84224eb5b	2	2	signals12St_FiberNomSt_MCE_1_ShearNormalized_17_window0.png	signals12St_FiberTapSt_DBE_1_ShearNormalized_17_window0.png	signals12St_FiberConstSt_MCE_1_ShearNormalized_17_window0.png	4.9	17	0	1_ShearNormalized	4	TRUE	heatmap	correct	TRUE
287	6ec59df4-6534-11e9-b188-44a84224eb5b	2	2	topics5_12St_FiberNomSt_Serv_1_ShearNormalized_27_window0.png	topics5_12St_FiberConstSt_DBE_1_ShearNormalized_27_window0.png	topics5_12St_FiberTapSt_Serv_1_ShearNormalized_27_window0.png	2.65	27	0	1_ShearNormalized	2	FALSE	topic	correct	TRUE
288	6ec59df4-6534-11e9-b188-44a84224eb5b	2	1	signals12St_FiberTapSt_MCE_1_ShearNormalized_31_window2.png	signals12St_FiberNomSt_DBE_1_ShearNormalized_31_window2.png	signals12St_FiberConstSt_MCE_1_ShearNormalized_31_window2.png	4.19	31	2	1_ShearNormalized	4	TRUE	heatmap	incorrect	FALSE
289	6ec59df4-6534-11e9-b188-44a84224eb5b	1	1	topics5_12St_BHinge_DBE_1_ShearNormalized_33_window1.png	topics5_12St_BHinge_DBE_1_ShearNormalized_33_window1.png	topics5_12St_FiberNomSt_DBE_1_ShearNormalized_33_window1.png	2.97	33	1	1_ShearNormalized	0	FALSE	topic	correct	TRUE
290	6ec59df4-6534-11e9-b188-44a84224eb5b	2	2	topics5_12St_FiberNomSt_Serv_1_ShearNormalized_20_window2.png	topics5_12St_FiberConstSt_DBE_1_ShearNormalized_20_window2.png	topics5_12St_FiberTapSt_Serv_1_ShearNormalized_20_window2.png	2.27	20	2	1_ShearNormalized	2	FALSE	topic	correct	TRUE
291	6ec59df4-6534-11e9-b188-44a84224eb5b	1	1	topics5_12St_FiberNomSt_MCE_1_ShearNormalized_05_window1.png	topics5_12St_FiberConstSt_MCE_1_ShearNormalized_05_window1.png	topics5_12St_FiberTapSt_DBE_1_ShearNormalized_05_window1.png	4.26	5	1	1_ShearNormalized	4	FALSE	topic	correct	TRUE
292	6ec59df4-6534-11e9-b188-44a84224eb5b	2	2	signals12St_BHinge_DBE_1_ShearNormalized_33_window1.png	signals12St_FiberNomSt_DBE_1_ShearNormalized_33_window1.png	signals12St_BHinge_DBE_1_ShearNormalized_33_window1.png	3.34	33	1	1_ShearNormalized	0	TRUE	heatmap	correct	TRUE
293	6ec59df4-6534-11e9-b188-44a84224eb5b	1	1	topics5_12St_BHinge_MCE_1_ShearNormalized_42_window1.png	topics5_12St_BHinge_MCE_1_ShearNormalized_42_window1.png	topics5_12St_FiberConstSt_MCE_1_ShearNormalized_42_window1.png	2.71	42	1	1_ShearNormalized	0	FALSE	topic	correct	TRUE
294	6ec59df4-6534-11e9-b188-44a84224eb5b	2	2	topics5_12St_BHinge_MCE_1_ShearNormalized_35_window0.png	topics5_12St_FiberConstSt_MCE_1_ShearNormalized_35_window0.png	topics5_12St_BHinge_Serv_1_ShearNormalized_35_window0.png	35.78	35	0	1_ShearNormalized	3	FALSE	topic	correct	TRUE
295	6ec59df4-6534-11e9-b188-44a84224eb5b	1	1	signals12St_FiberNomSt_Serv_1_ShearNormalized_10_window1.png	signals12St_FiberTapSt_Serv_1_ShearNormalized_10_window1.png	signals12St_FiberConstSt_MCE_1_ShearNormalized_10_window1.png	2.86	10	1	1_ShearNormalized	2	TRUE	heatmap	correct	TRUE
296	6ec59df4-6534-11e9-b188-44a84224eb5b	1	1	topics5_12St_BHinge_DBE_1_ShearNormalized_08_window0.png	topics5_12St_BHinge_MCE_1_ShearNormalized_08_window0.png	topics5_12St_FiberConstSt_DBE_1_ShearNormalized_08_window0.png	3.18	8	0	1_ShearNormalized	1	FALSE	topic	correct	TRUE
297	6ec59df4-6534-11e9-b188-44a84224eb5b	1	1	signals12St_FiberNomSt_Serv_1_ShearNormalized_07_window1.png	signals12St_FiberTapSt_Serv_1_ShearNormalized_07_window1.png	signals12St_FiberConstSt_DBE_1_ShearNormalized_07_window1.png	3.07	7	1	1_ShearNormalized	2	TRUE	heatmap	correct	TRUE
298	6ec59df4-6534-11e9-b188-44a84224eb5b	1	1	signals12St_FiberNomSt_Serv_1_ShearNormalized_20_window2.png	signals12St_FiberTapSt_Serv_1_ShearNormalized_20_window2.png	signals12St_FiberConstSt_DBE_1_ShearNormalized_20_window2.png	3.33	20	2	1_ShearNormalized	2	TRUE	heatmap	correct	TRUE
299	6ec59df4-6534-11e9-b188-44a84224eb5b	1	1	topics5_12St_FiberTapSt_MCE_1_ShearNormalized_26_window2.png	topics5_12St_FiberConstSt_MCE_1_ShearNormalized_26_window2.png	topics5_12St_FiberNomSt_DBE_1_ShearNormalized_26_window2.png	9.24	26	2	1_ShearNormalized	4	FALSE	topic	correct	TRUE
300	6ec59df4-6534-11e9-b188-44a84224eb5b	1	1	topics5_12St_BHinge_DBE_1_ShearNormalized_16_window2.png	topics5_12St_BHinge_MCE_1_ShearNormalized_16_window2.png	topics5_12St_FiberConstSt_DBE_1_ShearNormalized_16_window2.png	7.08	16	2	1_ShearNormalized	1	FALSE	topic	correct	TRUE
301	6ec59df4-6534-11e9-b188-44a84224eb5b	1	1	signals12St_FiberNomSt_Serv_1_ShearNormalized_27_window0.png	signals12St_FiberTapSt_Serv_1_ShearNormalized_27_window0.png	signals12St_FiberConstSt_DBE_1_ShearNormalized_27_window0.png	5.98	27	0	1_ShearNormalized	2	TRUE	heatmap	correct	TRUE
302	6ec59df4-6534-11e9-b188-44a84224eb5b	1	2	signals12St_BHinge_MCE_1_ShearNormalized_35_window0.png	signals12St_BHinge_Serv_1_ShearNormalized_35_window0.png	signals12St_FiberConstSt_MCE_1_ShearNormalized_35_window0.png	2.61	35	0	1_ShearNormalized	3	TRUE	heatmap	incorrect	FALSE
303	6ec59df4-6534-11e9-b188-44a84224eb5b	2	1	signals12St_BHinge_DBE_1_ShearNormalized_08_window0.png	signals12St_FiberConstSt_DBE_1_ShearNormalized_08_window0.png	signals12St_BHinge_MCE_1_ShearNormalized_08_window0.png	4.55	8	0	1_ShearNormalized	1	TRUE	heatmap	incorrect	FALSE
304	6ec59df4-6534-11e9-b188-44a84224eb5b	1	1	signals12St_BHinge_Serv_1_ShearNormalized_45_window1.png	signals12St_BHinge_DBE_1_ShearNormalized_45_window1.png	signals12St_FiberTapSt_Serv_1_ShearNormalized_45_window1.png	2.63	45	1	1_ShearNormalized	3	TRUE	heatmap	correct	TRUE
305	6ec59df4-6534-11e9-b188-44a84224eb5b	2	2	signals12St_FiberTapSt_MCE_1_ShearNormalized_26_window2.png	signals12St_FiberNomSt_DBE_1_ShearNormalized_26_window2.png	signals12St_FiberConstSt_MCE_1_ShearNormalized_26_window2.png	4.01	26	2	1_ShearNormalized	4	TRUE	heatmap	correct	TRUE
306	6ec59df4-6534-11e9-b188-44a84224eb5b	2	2	topics5_12St_FiberNomSt_Serv_1_ShearNormalized_10_window1.png	topics5_12St_FiberConstSt_MCE_1_ShearNormalized_10_window1.png	topics5_12St_FiberTapSt_Serv_1_ShearNormalized_10_window1.png	2.33	10	1	1_ShearNormalized	2	FALSE	topic	correct	TRUE
307	72ad16ae-6507-11e9-b4b3-44a84224eb5b	1	1	signals12St_FiberNomSt_Serv_1_ShearNormalized_15_window1.png	signals12St_FiberTapSt_Serv_1_ShearNormalized_15_window1.png	signals12St_FiberConstSt_DBE_1_ShearNormalized_15_window1.png	2.94	15	1	1_ShearNormalized	2	TRUE	heatmap	correct	TRUE
308	72ad16ae-6507-11e9-b4b3-44a84224eb5b	1	1	signals12St_BHinge_Serv_1_ShearNormalized_44_window2.png	signals12St_BHinge_DBE_1_ShearNormalized_44_window2.png	signals12St_FiberNomSt_Serv_1_ShearNormalized_44_window2.png	2.22	44	2	1_ShearNormalized	3	TRUE	heatmap	correct	TRUE
309	72ad16ae-6507-11e9-b4b3-44a84224eb5b	2	1	signals12St_BHinge_MCE_1_ShearNormalized_27_window1.png	signals12St_FiberNomSt_MCE_1_ShearNormalized_27_window1.png	signals12St_BHinge_DBE_1_ShearNormalized_27_window1.png	2.03	27	1	1_ShearNormalized	1	TRUE	heatmap	incorrect	FALSE
310	72ad16ae-6507-11e9-b4b3-44a84224eb5b	1	1	topics5_12St_BHinge_DBE_1_ShearNormalized_21_window1.png	topics5_12St_BHinge_MCE_1_ShearNormalized_21_window1.png	topics5_12St_FiberConstSt_DBE_1_ShearNormalized_21_window1.png	1.84	21	1	1_ShearNormalized	1	FALSE	topic	correct	TRUE
311	72ad16ae-6507-11e9-b4b3-44a84224eb5b	2	2	topics5_12St_FiberNomSt_Serv_1_ShearNormalized_29_window2.png	topics5_12St_FiberConstSt_DBE_1_ShearNormalized_29_window2.png	topics5_12St_FiberTapSt_Serv_1_ShearNormalized_29_window2.png	1.97	29	2	1_ShearNormalized	2	FALSE	topic	correct	TRUE
312	72ad16ae-6507-11e9-b4b3-44a84224eb5b	1	2	signals12St_BHinge_DBE_1_ShearNormalized_34_window1.png	signals12St_BHinge_Serv_1_ShearNormalized_34_window1.png	signals12St_FiberConstSt_DBE_1_ShearNormalized_34_window1.png	1.78	34	1	1_ShearNormalized	3	TRUE	heatmap	incorrect	FALSE
313	72ad16ae-6507-11e9-b4b3-44a84224eb5b	2	1	signals12St_BHinge_DBE_1_ShearNormalized_40_window1.png	signals12St_FiberConstSt_DBE_1_ShearNormalized_40_window1.png	signals12St_BHinge_MCE_1_ShearNormalized_40_window1.png	2.62	40	1	1_ShearNormalized	1	TRUE	heatmap	incorrect	FALSE
314	72ad16ae-6507-11e9-b4b3-44a84224eb5b	1	1	signals12St_BHinge_DBE_1_ShearNormalized_10_window0.png	signals12St_BHinge_Serv_1_ShearNormalized_10_window0.png	signals12St_FiberTapSt_DBE_1_ShearNormalized_10_window0.png	1.16	10	0	1_ShearNormalized	3	TRUE	heatmap	correct	TRUE
315	72ad16ae-6507-11e9-b4b3-44a84224eb5b	1	1	topics5_12St_FiberNomSt_MCE_1_ShearNormalized_28_window2.png	topics5_12St_FiberTapSt_MCE_1_ShearNormalized_28_window2.png	topics5_12St_FiberConstSt_DBE_1_ShearNormalized_28_window2.png	1.75	28	2	1_ShearNormalized	4	FALSE	topic	correct	TRUE
316	72ad16ae-6507-11e9-b4b3-44a84224eb5b	2	2	signals12St_BHinge_DBE_1_ShearNormalized_21_window1.png	signals12St_FiberConstSt_DBE_1_ShearNormalized_21_window1.png	signals12St_BHinge_MCE_1_ShearNormalized_21_window1.png	2.28	21	1	1_ShearNormalized	1	TRUE	heatmap	correct	TRUE
317	72ad16ae-6507-11e9-b4b3-44a84224eb5b	2	2	topics5_12St_BHinge_Serv_1_ShearNormalized_44_window2.png	topics5_12St_FiberNomSt_Serv_1_ShearNormalized_44_window2.png	topics5_12St_BHinge_DBE_1_ShearNormalized_44_window2.png	1.89	44	2	1_ShearNormalized	3	FALSE	topic	correct	TRUE
318	72ad16ae-6507-11e9-b4b3-44a84224eb5b	1	1	signals12St_FiberNomSt_Serv_1_ShearNormalized_29_window2.png	signals12St_FiberTapSt_Serv_1_ShearNormalized_29_window2.png	signals12St_FiberConstSt_DBE_1_ShearNormalized_29_window2.png	2.1	29	2	1_ShearNormalized	2	TRUE	heatmap	correct	TRUE
319	72ad16ae-6507-11e9-b4b3-44a84224eb5b	1	1	topics5_12St_BHinge_MCE_1_ShearNormalized_27_window1.png	topics5_12St_BHinge_MCE_1_ShearNormalized_27_window1.png	topics5_12St_FiberNomSt_MCE_1_ShearNormalized_27_window1.png	2.09	27	1	1_ShearNormalized	0	FALSE	topic	correct	TRUE
320	72ad16ae-6507-11e9-b4b3-44a84224eb5b	2	1	topics5_12St_BHinge_DBE_1_ShearNormalized_10_window0.png	topics5_12St_FiberTapSt_DBE_1_ShearNormalized_10_window0.png	topics5_12St_BHinge_Serv_1_ShearNormalized_10_window0.png	1.66	10	0	1_ShearNormalized	3	FALSE	topic	incorrect	FALSE
321	72ad16ae-6507-11e9-b4b3-44a84224eb5b	2	1	signals12St_BHinge_DBE_1_ShearNormalized_44_window2.png	signals12St_FiberTapSt_DBE_1_ShearNormalized_44_window2.png	signals12St_BHinge_MCE_1_ShearNormalized_44_window2.png	1.57	44	2	1_ShearNormalized	1	TRUE	heatmap	incorrect	FALSE
322	72ad16ae-6507-11e9-b4b3-44a84224eb5b	2	2	topics5_12St_FiberNomSt_Serv_1_ShearNormalized_15_window1.png	topics5_12St_FiberConstSt_DBE_1_ShearNormalized_15_window1.png	topics5_12St_FiberTapSt_Serv_1_ShearNormalized_15_window1.png	1.75	15	1	1_ShearNormalized	2	FALSE	topic	correct	TRUE
323	72ad16ae-6507-11e9-b4b3-44a84224eb5b	1	1	signals12St_FiberNomSt_Serv_1_ShearNormalized_20_window0.png	signals12St_FiberConstSt_Serv_1_ShearNormalized_20_window0.png	signals12St_FiberTapSt_DBE_1_ShearNormalized_20_window0.png	2.13	20	0	1_ShearNormalized	2	TRUE	heatmap	correct	TRUE
324	72ad16ae-6507-11e9-b4b3-44a84224eb5b	2	2	topics5_12St_BHinge_DBE_1_ShearNormalized_34_window1.png	topics5_12St_FiberConstSt_DBE_1_ShearNormalized_34_window1.png	topics5_12St_BHinge_Serv_1_ShearNormalized_34_window1.png	3.87	34	1	1_ShearNormalized	3	FALSE	topic	correct	TRUE
325	72ad16ae-6507-11e9-b4b3-44a84224eb5b	2	2	topics5_12St_FiberNomSt_Serv_1_ShearNormalized_20_window0.png	topics5_12St_FiberTapSt_DBE_1_ShearNormalized_20_window0.png	topics5_12St_FiberConstSt_Serv_1_ShearNormalized_20_window0.png	2.77	20	0	1_ShearNormalized	2	FALSE	topic	correct	TRUE
326	72ad16ae-6507-11e9-b4b3-44a84224eb5b	1	1	topics5_12St_BHinge_MCE_1_ShearNormalized_27_window1.png	topics5_12St_BHinge_DBE_1_ShearNormalized_27_window1.png	topics5_12St_FiberNomSt_MCE_1_ShearNormalized_27_window1.png	1.92	27	1	1_ShearNormalized	1	FALSE	topic	correct	TRUE
327	72ad16ae-6507-11e9-b4b3-44a84224eb5b	1	1	signals12St_FiberConstSt_Serv_1_ShearNormalized_07_window0.png	signals12St_FiberTapSt_Serv_1_ShearNormalized_07_window0.png	signals12St_FiberNomSt_MCE_1_ShearNormalized_07_window0.png	1.67	7	0	1_ShearNormalized	2	TRUE	heatmap	correct	TRUE
328	72ad16ae-6507-11e9-b4b3-44a84224eb5b	2	1	topics5_12St_BHinge_DBE_1_ShearNormalized_23_window2.png	topics5_12St_FiberConstSt_DBE_1_ShearNormalized_23_window2.png	topics5_12St_BHinge_Serv_1_ShearNormalized_23_window2.png	2.33	23	2	1_ShearNormalized	3	FALSE	topic	incorrect	FALSE
329	72ad16ae-6507-11e9-b4b3-44a84224eb5b	2	2	signals12St_BHinge_MCE_1_ShearNormalized_28_window1.png	signals12St_FiberTapSt_MCE_1_ShearNormalized_28_window1.png	signals12St_BHinge_MCE_1_ShearNormalized_28_window1.png	1.83	28	1	1_ShearNormalized	0	TRUE	heatmap	correct	TRUE
330	72ad16ae-6507-11e9-b4b3-44a84224eb5b	2	1	signals12St_FiberNomSt_MCE_1_ShearNormalized_28_window2.png	signals12St_FiberConstSt_DBE_1_ShearNormalized_28_window2.png	signals12St_FiberTapSt_MCE_1_ShearNormalized_28_window2.png	1.49	28	2	1_ShearNormalized	4	TRUE	heatmap	incorrect	FALSE
331	72ad16ae-6507-11e9-b4b3-44a84224eb5b	2	2	topics5_12St_FiberConstSt_Serv_1_ShearNormalized_07_window0.png	topics5_12St_FiberNomSt_MCE_1_ShearNormalized_07_window0.png	topics5_12St_FiberTapSt_Serv_1_ShearNormalized_07_window0.png	1.71	7	0	1_ShearNormalized	2	FALSE	topic	correct	TRUE
332	72ad16ae-6507-11e9-b4b3-44a84224eb5b	2	1	signals12St_BHinge_MCE_1_ShearNormalized_27_window1.png	signals12St_FiberNomSt_MCE_1_ShearNormalized_27_window1.png	signals12St_BHinge_MCE_1_ShearNormalized_27_window1.png	1.34	27	1	1_ShearNormalized	0	TRUE	heatmap	incorrect	FALSE
333	72ad16ae-6507-11e9-b4b3-44a84224eb5b	2	2	topics5_12St_FiberNomSt_Serv_1_ShearNormalized_21_window0.png	topics5_12St_FiberConstSt_MCE_1_ShearNormalized_21_window0.png	topics5_12St_FiberTapSt_Serv_1_ShearNormalized_21_window0.png	1.71	21	0	1_ShearNormalized	2	FALSE	topic	correct	TRUE
334	72ad16ae-6507-11e9-b4b3-44a84224eb5b	1	1	topics5_12St_BHinge_MCE_1_ShearNormalized_28_window1.png	topics5_12St_BHinge_MCE_1_ShearNormalized_28_window1.png	topics5_12St_FiberTapSt_MCE_1_ShearNormalized_28_window1.png	1.44	28	1	1_ShearNormalized	0	FALSE	topic	correct	TRUE
335	72ad16ae-6507-11e9-b4b3-44a84224eb5b	1	2	signals12St_FiberNomSt_Serv_1_ShearNormalized_21_window0.png	signals12St_FiberTapSt_Serv_1_ShearNormalized_21_window0.png	signals12St_FiberConstSt_MCE_1_ShearNormalized_21_window0.png	1.61	21	0	1_ShearNormalized	2	TRUE	heatmap	incorrect	FALSE
336	72ad16ae-6507-11e9-b4b3-44a84224eb5b	1	1	topics5_12St_BHinge_DBE_1_ShearNormalized_40_window1.png	topics5_12St_BHinge_MCE_1_ShearNormalized_40_window1.png	topics5_12St_FiberConstSt_DBE_1_ShearNormalized_40_window1.png	1.48	40	1	1_ShearNormalized	1	FALSE	topic	correct	TRUE
337	72ad16ae-6507-11e9-b4b3-44a84224eb5b	1	1	signals12St_BHinge_DBE_1_ShearNormalized_23_window2.png	signals12St_BHinge_Serv_1_ShearNormalized_23_window2.png	signals12St_FiberConstSt_DBE_1_ShearNormalized_23_window2.png	2.76	23	2	1_ShearNormalized	3	TRUE	heatmap	correct	TRUE
338	72ad16ae-6507-11e9-b4b3-44a84224eb5b	1	1	topics5_12St_BHinge_DBE_1_ShearNormalized_44_window2.png	topics5_12St_BHinge_MCE_1_ShearNormalized_44_window2.png	topics5_12St_FiberTapSt_DBE_1_ShearNormalized_44_window2.png	2.48	44	2	1_ShearNormalized	1	FALSE	topic	correct	TRUE
339	72ad16ae-6507-11e9-b4b3-44a84224eb5b	1	2	signals12St_BHinge_MCE_1_ShearNormalized_12_window2.png	signals12St_BHinge_Serv_1_ShearNormalized_12_window2.png	signals12St_FiberNomSt_MCE_1_ShearNormalized_12_window2.png	2.13	12	2	1_ShearNormalized	3	TRUE	heatmap	incorrect	FALSE
340	72ad16ae-6507-11e9-b4b3-44a84224eb5b	2	1	topics5_12St_BHinge_MCE_1_ShearNormalized_12_window2.png	topics5_12St_FiberNomSt_MCE_1_ShearNormalized_12_window2.png	topics5_12St_BHinge_Serv_1_ShearNormalized_12_window2.png	2.25	12	2	1_ShearNormalized	3	FALSE	topic	incorrect	FALSE
341	7ce836da-6511-11e9-aa66-44a84224eb5b	2	2	signals12St_BHinge_DBE_1_ShearNormalized_47_window1.png	signals12St_FiberNomSt_DBE_1_ShearNormalized_47_window1.png	signals12St_BHinge_MCE_1_ShearNormalized_47_window1.png	21.31	47	1	1_ShearNormalized	1	TRUE	heatmap	correct	TRUE
342	7ce836da-6511-11e9-aa66-44a84224eb5b	1	2	topics5_12St_FiberConstSt_MCE_1_ShearNormalized_19_window0.png	topics5_12St_FiberTapSt_MCE_1_ShearNormalized_19_window0.png	topics5_12St_FiberNomSt_DBE_1_ShearNormalized_19_window0.png	7.94	19	0	1_ShearNormalized	4	FALSE	topic	incorrect	FALSE
343	7ce836da-6511-11e9-aa66-44a84224eb5b	2	2	topics5_12St_BHinge_DBE_1_ShearNormalized_32_window0.png	topics5_12St_FiberTapSt_DBE_1_ShearNormalized_32_window0.png	topics5_12St_BHinge_Serv_1_ShearNormalized_32_window0.png	7.1	32	0	1_ShearNormalized	3	FALSE	topic	correct	TRUE
344	7ce836da-6511-11e9-aa66-44a84224eb5b	2	2	signals12St_BHinge_MCE_1_ShearNormalized_08_window1.png	signals12St_FiberTapSt_MCE_1_ShearNormalized_08_window1.png	signals12St_BHinge_MCE_1_ShearNormalized_08_window1.png	12.3	8	1	1_ShearNormalized	0	TRUE	heatmap	correct	TRUE
345	7ce836da-6511-11e9-aa66-44a84224eb5b	1	1	topics5_12St_BHinge_MCE_1_ShearNormalized_08_window1.png	topics5_12St_BHinge_MCE_1_ShearNormalized_08_window1.png	topics5_12St_FiberTapSt_MCE_1_ShearNormalized_08_window1.png	7.18	8	1	1_ShearNormalized	0	FALSE	topic	correct	TRUE
346	7ce836da-6511-11e9-aa66-44a84224eb5b	1	1	topics5_12St_BHinge_MCE_1_ShearNormalized_44_window2.png	topics5_12St_BHinge_DBE_1_ShearNormalized_44_window2.png	topics5_12St_FiberTapSt_MCE_1_ShearNormalized_44_window2.png	11.47	44	2	1_ShearNormalized	1	FALSE	topic	correct	TRUE
347	7ce836da-6511-11e9-aa66-44a84224eb5b	2	2	signals12St_BHinge_MCE_1_ShearNormalized_07_window0.png	signals12St_FiberTapSt_MCE_1_ShearNormalized_07_window0.png	signals12St_BHinge_MCE_1_ShearNormalized_07_window0.png	6.31	7	0	1_ShearNormalized	0	TRUE	heatmap	correct	TRUE
348	7ce836da-6511-11e9-aa66-44a84224eb5b	2	2	topics5_12St_FiberTapSt_Serv_1_ShearNormalized_40_window1.png	topics5_12St_FiberConstSt_MCE_1_ShearNormalized_40_window1.png	topics5_12St_FiberNomSt_Serv_1_ShearNormalized_40_window1.png	4.08	40	1	1_ShearNormalized	2	FALSE	topic	correct	TRUE
349	7ce836da-6511-11e9-aa66-44a84224eb5b	2	1	topics5_12St_BHinge_MCE_1_ShearNormalized_45_window1.png	topics5_12St_FiberTapSt_MCE_1_ShearNormalized_45_window1.png	topics5_12St_BHinge_Serv_1_ShearNormalized_45_window1.png	7.06	45	1	1_ShearNormalized	3	FALSE	topic	incorrect	FALSE
350	7ce836da-6511-11e9-aa66-44a84224eb5b	1	1	topics5_12St_BHinge_MCE_1_ShearNormalized_07_window0.png	topics5_12St_BHinge_MCE_1_ShearNormalized_07_window0.png	topics5_12St_FiberTapSt_MCE_1_ShearNormalized_07_window0.png	7.23	7	0	1_ShearNormalized	0	FALSE	topic	correct	TRUE
351	7ce836da-6511-11e9-aa66-44a84224eb5b	2	2	signals12St_BHinge_MCE_1_ShearNormalized_37_window1.png	signals12St_FiberNomSt_MCE_1_ShearNormalized_37_window1.png	signals12St_BHinge_DBE_1_ShearNormalized_37_window1.png	10.15	37	1	1_ShearNormalized	1	TRUE	heatmap	correct	TRUE
352	7ce836da-6511-11e9-aa66-44a84224eb5b	1	1	signals12St_FiberNomSt_Serv_1_ShearNormalized_45_window1.png	signals12St_FiberTapSt_Serv_1_ShearNormalized_45_window1.png	signals12St_FiberConstSt_DBE_1_ShearNormalized_45_window1.png	7.27	45	1	1_ShearNormalized	2	TRUE	heatmap	correct	TRUE
353	7ce836da-6511-11e9-aa66-44a84224eb5b	1	1	topics5_12St_BHinge_MCE_1_ShearNormalized_40_window2.png	topics5_12St_BHinge_DBE_1_ShearNormalized_40_window2.png	topics5_12St_FiberNomSt_MCE_1_ShearNormalized_40_window2.png	4.77	40	2	1_ShearNormalized	1	FALSE	topic	correct	TRUE
354	7ce836da-6511-11e9-aa66-44a84224eb5b	1	1	signals12St_BHinge_Serv_1_ShearNormalized_30_window2.png	signals12St_BHinge_MCE_1_ShearNormalized_30_window2.png	signals12St_FiberConstSt_Serv_1_ShearNormalized_30_window2.png	6	30	2	1_ShearNormalized	3	TRUE	heatmap	correct	TRUE
355	7ce836da-6511-11e9-aa66-44a84224eb5b	1	2	signals12St_BHinge_Serv_1_ShearNormalized_46_window2.png	signals12St_BHinge_DBE_1_ShearNormalized_46_window2.png	signals12St_FiberConstSt_Serv_1_ShearNormalized_46_window2.png	6.73	46	2	1_ShearNormalized	3	TRUE	heatmap	incorrect	FALSE
356	7ce836da-6511-11e9-aa66-44a84224eb5b	1	1	topics5_12St_BHinge_DBE_1_ShearNormalized_47_window1.png	topics5_12St_BHinge_MCE_1_ShearNormalized_47_window1.png	topics5_12St_FiberNomSt_DBE_1_ShearNormalized_47_window1.png	9.59	47	1	1_ShearNormalized	1	FALSE	topic	correct	TRUE
357	7ce836da-6511-11e9-aa66-44a84224eb5b	2	2	topics5_12St_FiberNomSt_Serv_1_ShearNormalized_45_window1.png	topics5_12St_FiberConstSt_DBE_1_ShearNormalized_45_window1.png	topics5_12St_FiberTapSt_Serv_1_ShearNormalized_45_window1.png	6.53	45	1	1_ShearNormalized	2	FALSE	topic	correct	TRUE
358	7ce836da-6511-11e9-aa66-44a84224eb5b	1	1	topics5_12St_BHinge_MCE_1_ShearNormalized_37_window1.png	topics5_12St_BHinge_DBE_1_ShearNormalized_37_window1.png	topics5_12St_FiberNomSt_MCE_1_ShearNormalized_37_window1.png	10.37	37	1	1_ShearNormalized	1	FALSE	topic	correct	TRUE
359	7ce836da-6511-11e9-aa66-44a84224eb5b	1	1	signals12St_FiberTapSt_Serv_1_ShearNormalized_40_window1.png	signals12St_FiberNomSt_Serv_1_ShearNormalized_40_window1.png	signals12St_FiberConstSt_MCE_1_ShearNormalized_40_window1.png	5.97	40	1	1_ShearNormalized	2	TRUE	heatmap	correct	TRUE
360	7ce836da-6511-11e9-aa66-44a84224eb5b	1	1	signals12St_BHinge_DBE_1_ShearNormalized_32_window0.png	signals12St_BHinge_Serv_1_ShearNormalized_32_window0.png	signals12St_FiberTapSt_DBE_1_ShearNormalized_32_window0.png	3.5	32	0	1_ShearNormalized	3	TRUE	heatmap	correct	TRUE
361	7ce836da-6511-11e9-aa66-44a84224eb5b	1	2	signals12St_BHinge_MCE_1_ShearNormalized_45_window1.png	signals12St_BHinge_Serv_1_ShearNormalized_45_window1.png	signals12St_FiberTapSt_MCE_1_ShearNormalized_45_window1.png	14.4	45	1	1_ShearNormalized	3	TRUE	heatmap	incorrect	FALSE
362	7ce836da-6511-11e9-aa66-44a84224eb5b	1	2	signals12St_FiberConstSt_Serv_1_ShearNormalized_05_window0.png	signals12St_FiberNomSt_Serv_1_ShearNormalized_05_window0.png	signals12St_FiberTapSt_DBE_1_ShearNormalized_05_window0.png	6.11	5	0	1_ShearNormalized	2	TRUE	heatmap	incorrect	FALSE
363	7ce836da-6511-11e9-aa66-44a84224eb5b	1	1	signals12St_FiberConstSt_Serv_1_ShearNormalized_05_window0.png	signals12St_FiberNomSt_Serv_1_ShearNormalized_05_window0.png	signals12St_FiberTapSt_DBE_1_ShearNormalized_05_window0.png	11.05	5	0	1_ShearNormalized	2	TRUE	heatmap	correct	TRUE
364	7ce836da-6511-11e9-aa66-44a84224eb5b	2	2	signals12St_BHinge_MCE_1_ShearNormalized_18_window2.png	signals12St_FiberConstSt_MCE_1_ShearNormalized_18_window2.png	signals12St_BHinge_DBE_1_ShearNormalized_18_window2.png	13.97	18	2	1_ShearNormalized	1	TRUE	heatmap	correct	TRUE
365	7ce836da-6511-11e9-aa66-44a84224eb5b	2	2	signals12St_FiberTapSt_MCE_1_ShearNormalized_03_window2.png	signals12St_FiberNomSt_DBE_1_ShearNormalized_03_window2.png	signals12St_FiberConstSt_MCE_1_ShearNormalized_03_window2.png	7.81	3	2	1_ShearNormalized	4	TRUE	heatmap	correct	TRUE
366	7ce836da-6511-11e9-aa66-44a84224eb5b	2	2	topics5_12St_BHinge_Serv_1_ShearNormalized_30_window2.png	topics5_12St_FiberConstSt_Serv_1_ShearNormalized_30_window2.png	topics5_12St_BHinge_MCE_1_ShearNormalized_30_window2.png	8.24	30	2	1_ShearNormalized	3	FALSE	topic	correct	TRUE
367	7ce836da-6511-11e9-aa66-44a84224eb5b	2	2	topics5_12St_BHinge_MCE_1_ShearNormalized_09_window0.png	topics5_12St_FiberTapSt_MCE_1_ShearNormalized_09_window0.png	topics5_12St_BHinge_Serv_1_ShearNormalized_09_window0.png	9.84	9	0	1_ShearNormalized	3	FALSE	topic	correct	TRUE
368	7ce836da-6511-11e9-aa66-44a84224eb5b	2	2	signals12St_BHinge_MCE_1_ShearNormalized_44_window2.png	signals12St_FiberTapSt_MCE_1_ShearNormalized_44_window2.png	signals12St_BHinge_DBE_1_ShearNormalized_44_window2.png	22.71	44	2	1_ShearNormalized	1	TRUE	heatmap	correct	TRUE
369	7ce836da-6511-11e9-aa66-44a84224eb5b	1	1	topics5_12St_BHinge_MCE_1_ShearNormalized_18_window2.png	topics5_12St_BHinge_DBE_1_ShearNormalized_18_window2.png	topics5_12St_FiberConstSt_MCE_1_ShearNormalized_18_window2.png	3.45	18	2	1_ShearNormalized	1	FALSE	topic	correct	TRUE
370	7ce836da-6511-11e9-aa66-44a84224eb5b	2	2	signals12St_FiberConstSt_MCE_1_ShearNormalized_19_window0.png	signals12St_FiberNomSt_DBE_1_ShearNormalized_19_window0.png	signals12St_FiberTapSt_MCE_1_ShearNormalized_19_window0.png	15.7	19	0	1_ShearNormalized	4	TRUE	heatmap	correct	TRUE
371	7ce836da-6511-11e9-aa66-44a84224eb5b	2	2	topics5_12St_FiberConstSt_Serv_1_ShearNormalized_05_window0.png	topics5_12St_FiberTapSt_DBE_1_ShearNormalized_05_window0.png	topics5_12St_FiberNomSt_Serv_1_ShearNormalized_05_window0.png	0.75	5	0	1_ShearNormalized	2	FALSE	topic	correct	TRUE
372	7ce836da-6511-11e9-aa66-44a84224eb5b	2	2	topics5_12St_FiberConstSt_Serv_1_ShearNormalized_05_window0.png	topics5_12St_FiberTapSt_DBE_1_ShearNormalized_05_window0.png	topics5_12St_FiberNomSt_Serv_1_ShearNormalized_05_window0.png	6.64	5	0	1_ShearNormalized	2	FALSE	topic	correct	TRUE
373	7ce836da-6511-11e9-aa66-44a84224eb5b	2	1	topics5_12St_BHinge_Serv_1_ShearNormalized_46_window2.png	topics5_12St_FiberConstSt_Serv_1_ShearNormalized_46_window2.png	topics5_12St_BHinge_DBE_1_ShearNormalized_46_window2.png	13.38	46	2	1_ShearNormalized	3	FALSE	topic	incorrect	FALSE
374	7ce836da-6511-11e9-aa66-44a84224eb5b	1	1	signals12St_BHinge_MCE_1_ShearNormalized_09_window0.png	signals12St_BHinge_Serv_1_ShearNormalized_09_window0.png	signals12St_FiberTapSt_MCE_1_ShearNormalized_09_window0.png	3.41	9	0	1_ShearNormalized	3	TRUE	heatmap	correct	TRUE
375	7ce836da-6511-11e9-aa66-44a84224eb5b	1	1	topics5_12St_FiberTapSt_MCE_1_ShearNormalized_03_window2.png	topics5_12St_FiberConstSt_MCE_1_ShearNormalized_03_window2.png	topics5_12St_FiberNomSt_DBE_1_ShearNormalized_03_window2.png	9.01	3	2	1_ShearNormalized	4	FALSE	topic	correct	TRUE
376	7ce836da-6511-11e9-aa66-44a84224eb5b	2	2	signals12St_BHinge_MCE_1_ShearNormalized_40_window2.png	signals12St_FiberNomSt_MCE_1_ShearNormalized_40_window2.png	signals12St_BHinge_DBE_1_ShearNormalized_40_window2.png	9.54	40	2	1_ShearNormalized	1	TRUE	heatmap	correct	TRUE
377	875883aa-655b-11e9-9462-44a84224eb5b	2	1	signals12St_FiberTapSt_MCE_1_ShearNormalized_35_window2.png	signals12St_FiberConstSt_DBE_1_ShearNormalized_35_window2.png	signals12St_FiberNomSt_MCE_1_ShearNormalized_35_window2.png	3.83	35	2	1_ShearNormalized	4	TRUE	heatmap	incorrect	FALSE
378	875883aa-655b-11e9-9462-44a84224eb5b	2	1	topics5_12St_BHinge_DBE_1_ShearNormalized_29_window2.png	topics5_12St_FiberConstSt_DBE_1_ShearNormalized_29_window2.png	topics5_12St_BHinge_Serv_1_ShearNormalized_29_window2.png	7.44	29	2	1_ShearNormalized	3	FALSE	topic	incorrect	FALSE
379	875883aa-655b-11e9-9462-44a84224eb5b	2	2	signals12St_BHinge_DBE_1_ShearNormalized_13_window1.png	signals12St_FiberConstSt_DBE_1_ShearNormalized_13_window1.png	signals12St_BHinge_DBE_1_ShearNormalized_13_window1.png	4.14	13	1	1_ShearNormalized	0	TRUE	heatmap	correct	TRUE
380	875883aa-655b-11e9-9462-44a84224eb5b	2	1	signals12St_BHinge_MCE_1_ShearNormalized_21_window1.png	signals12St_FiberTapSt_MCE_1_ShearNormalized_21_window1.png	signals12St_BHinge_DBE_1_ShearNormalized_21_window1.png	5.4	21	1	1_ShearNormalized	1	TRUE	heatmap	incorrect	FALSE
381	875883aa-655b-11e9-9462-44a84224eb5b	2	2	signals12St_FiberNomSt_MCE_1_ShearNormalized_29_window2.png	signals12St_FiberConstSt_DBE_1_ShearNormalized_29_window2.png	signals12St_FiberTapSt_MCE_1_ShearNormalized_29_window2.png	2.93	29	2	1_ShearNormalized	4	TRUE	heatmap	correct	TRUE
382	875883aa-655b-11e9-9462-44a84224eb5b	2	2	signals12St_FiberNomSt_MCE_1_ShearNormalized_20_window2.png	signals12St_FiberConstSt_DBE_1_ShearNormalized_20_window2.png	signals12St_FiberTapSt_MCE_1_ShearNormalized_20_window2.png	5.45	20	2	1_ShearNormalized	4	TRUE	heatmap	correct	TRUE
383	875883aa-655b-11e9-9462-44a84224eb5b	1	1	topics5_12St_BHinge_MCE_1_ShearNormalized_43_window0.png	topics5_12St_BHinge_MCE_1_ShearNormalized_43_window0.png	topics5_12St_FiberTapSt_MCE_1_ShearNormalized_43_window0.png	3.51	43	0	1_ShearNormalized	0	FALSE	topic	correct	TRUE
384	875883aa-655b-11e9-9462-44a84224eb5b	1	1	topics5_12St_FiberConstSt_MCE_1_ShearNormalized_17_window0.png	topics5_12St_FiberTapSt_MCE_1_ShearNormalized_17_window0.png	topics5_12St_FiberNomSt_DBE_1_ShearNormalized_17_window0.png	5.79	17	0	1_ShearNormalized	4	FALSE	topic	correct	TRUE
385	875883aa-655b-11e9-9462-44a84224eb5b	2	2	topics5_12St_FiberTapSt_Serv_1_ShearNormalized_32_window0.png	topics5_12St_FiberNomSt_DBE_1_ShearNormalized_32_window0.png	topics5_12St_FiberConstSt_Serv_1_ShearNormalized_32_window0.png	6.16	32	0	1_ShearNormalized	2	FALSE	topic	correct	TRUE
386	875883aa-655b-11e9-9462-44a84224eb5b	2	2	signals12St_FiberConstSt_MCE_1_ShearNormalized_17_window0.png	signals12St_FiberNomSt_DBE_1_ShearNormalized_17_window0.png	signals12St_FiberTapSt_MCE_1_ShearNormalized_17_window0.png	3.36	17	0	1_ShearNormalized	4	TRUE	heatmap	correct	TRUE
387	875883aa-655b-11e9-9462-44a84224eb5b	1	1	topics5_12St_FiberNomSt_MCE_1_ShearNormalized_20_window2.png	topics5_12St_FiberTapSt_MCE_1_ShearNormalized_20_window2.png	topics5_12St_FiberConstSt_DBE_1_ShearNormalized_20_window2.png	3.19	20	2	1_ShearNormalized	4	FALSE	topic	correct	TRUE
388	875883aa-655b-11e9-9462-44a84224eb5b	2	2	signals12St_BHinge_MCE_1_ShearNormalized_43_window0.png	signals12St_FiberTapSt_MCE_1_ShearNormalized_43_window0.png	signals12St_BHinge_MCE_1_ShearNormalized_43_window0.png	3.98	43	0	1_ShearNormalized	0	TRUE	heatmap	correct	TRUE
389	875883aa-655b-11e9-9462-44a84224eb5b	1	1	topics5_12St_BHinge_DBE_1_ShearNormalized_13_window2.png	topics5_12St_BHinge_MCE_1_ShearNormalized_13_window2.png	topics5_12St_FiberTapSt_DBE_1_ShearNormalized_13_window2.png	2.38	13	2	1_ShearNormalized	1	FALSE	topic	correct	TRUE
390	875883aa-655b-11e9-9462-44a84224eb5b	1	1	signals12St_FiberConstSt_Serv_1_ShearNormalized_08_window0.png	signals12St_FiberTapSt_Serv_1_ShearNormalized_08_window0.png	signals12St_FiberNomSt_DBE_1_ShearNormalized_08_window0.png	3.52	8	0	1_ShearNormalized	2	TRUE	heatmap	correct	TRUE
391	875883aa-655b-11e9-9462-44a84224eb5b	2	2	signals12St_FiberConstSt_MCE_1_ShearNormalized_47_window0.png	signals12St_FiberTapSt_DBE_1_ShearNormalized_47_window0.png	signals12St_FiberNomSt_MCE_1_ShearNormalized_47_window0.png	4.13	47	0	1_ShearNormalized	4	TRUE	heatmap	correct	TRUE
392	875883aa-655b-11e9-9462-44a84224eb5b	1	1	topics5_12St_BHinge_MCE_1_ShearNormalized_21_window1.png	topics5_12St_BHinge_DBE_1_ShearNormalized_21_window1.png	topics5_12St_FiberTapSt_MCE_1_ShearNormalized_21_window1.png	2.18	21	1	1_ShearNormalized	1	FALSE	topic	correct	TRUE
393	875883aa-655b-11e9-9462-44a84224eb5b	1	1	topics5_12St_FiberTapSt_MCE_1_ShearNormalized_35_window2.png	topics5_12St_FiberNomSt_MCE_1_ShearNormalized_35_window2.png	topics5_12St_FiberConstSt_DBE_1_ShearNormalized_35_window2.png	7.29	35	2	1_ShearNormalized	4	FALSE	topic	correct	TRUE
394	875883aa-655b-11e9-9462-44a84224eb5b	1	1	topics5_12St_FiberConstSt_MCE_1_ShearNormalized_47_window0.png	topics5_12St_FiberNomSt_MCE_1_ShearNormalized_47_window0.png	topics5_12St_FiberTapSt_DBE_1_ShearNormalized_47_window0.png	3.81	47	0	1_ShearNormalized	4	FALSE	topic	correct	TRUE
395	875883aa-655b-11e9-9462-44a84224eb5b	1	1	signals12St_BHinge_Serv_1_ShearNormalized_36_window1.png	signals12St_BHinge_DBE_1_ShearNormalized_36_window1.png	signals12St_FiberConstSt_Serv_1_ShearNormalized_36_window1.png	6.29	36	1	1_ShearNormalized	3	TRUE	heatmap	correct	TRUE
396	875883aa-655b-11e9-9462-44a84224eb5b	2	2	topics5_12St_BHinge_DBE_1_ShearNormalized_49_window0.png	topics5_12St_FiberConstSt_DBE_1_ShearNormalized_49_window0.png	topics5_12St_BHinge_Serv_1_ShearNormalized_49_window0.png	2.63	49	0	1_ShearNormalized	3	FALSE	topic	correct	TRUE
397	875883aa-655b-11e9-9462-44a84224eb5b	1	2	signals12St_BHinge_DBE_1_ShearNormalized_29_window2.png	signals12St_BHinge_Serv_1_ShearNormalized_29_window2.png	signals12St_FiberConstSt_DBE_1_ShearNormalized_29_window2.png	2.53	29	2	1_ShearNormalized	3	TRUE	heatmap	incorrect	FALSE
398	875883aa-655b-11e9-9462-44a84224eb5b	1	2	signals12St_BHinge_DBE_1_ShearNormalized_49_window0.png	signals12St_BHinge_Serv_1_ShearNormalized_49_window0.png	signals12St_FiberConstSt_DBE_1_ShearNormalized_49_window0.png	2.88	49	0	1_ShearNormalized	3	TRUE	heatmap	incorrect	FALSE
399	875883aa-655b-11e9-9462-44a84224eb5b	1	1	topics5_12St_BHinge_DBE_1_ShearNormalized_30_window1.png	topics5_12St_BHinge_MCE_1_ShearNormalized_30_window1.png	topics5_12St_FiberNomSt_DBE_1_ShearNormalized_30_window1.png	1.82	30	1	1_ShearNormalized	1	FALSE	topic	correct	TRUE
400	875883aa-655b-11e9-9462-44a84224eb5b	1	1	signals12St_FiberConstSt_Serv_1_ShearNormalized_08_window2.png	signals12St_FiberNomSt_Serv_1_ShearNormalized_08_window2.png	signals12St_FiberTapSt_MCE_1_ShearNormalized_08_window2.png	2.86	8	2	1_ShearNormalized	2	TRUE	heatmap	correct	TRUE
401	875883aa-655b-11e9-9462-44a84224eb5b	2	2	signals12St_BHinge_DBE_1_ShearNormalized_13_window2.png	signals12St_FiberTapSt_DBE_1_ShearNormalized_13_window2.png	signals12St_BHinge_MCE_1_ShearNormalized_13_window2.png	3.02	13	2	1_ShearNormalized	1	TRUE	heatmap	correct	TRUE
402	875883aa-655b-11e9-9462-44a84224eb5b	1	1	topics5_12St_FiberNomSt_MCE_1_ShearNormalized_29_window2.png	topics5_12St_FiberTapSt_MCE_1_ShearNormalized_29_window2.png	topics5_12St_FiberConstSt_DBE_1_ShearNormalized_29_window2.png	2.17	29	2	1_ShearNormalized	4	FALSE	topic	correct	TRUE
403	875883aa-655b-11e9-9462-44a84224eb5b	2	2	topics5_12St_FiberConstSt_Serv_1_ShearNormalized_08_window0.png	topics5_12St_FiberNomSt_DBE_1_ShearNormalized_08_window0.png	topics5_12St_FiberTapSt_Serv_1_ShearNormalized_08_window0.png	3.57	8	0	1_ShearNormalized	2	FALSE	topic	correct	TRUE
404	875883aa-655b-11e9-9462-44a84224eb5b	2	2	topics5_12St_BHinge_Serv_1_ShearNormalized_36_window1.png	topics5_12St_FiberConstSt_Serv_1_ShearNormalized_36_window1.png	topics5_12St_BHinge_DBE_1_ShearNormalized_36_window1.png	6.71	36	1	1_ShearNormalized	3	FALSE	topic	correct	TRUE
405	875883aa-655b-11e9-9462-44a84224eb5b	2	2	topics5_12St_FiberConstSt_Serv_1_ShearNormalized_08_window2.png	topics5_12St_FiberTapSt_MCE_1_ShearNormalized_08_window2.png	topics5_12St_FiberNomSt_Serv_1_ShearNormalized_08_window2.png	3.44	8	2	1_ShearNormalized	2	FALSE	topic	correct	TRUE
406	875883aa-655b-11e9-9462-44a84224eb5b	2	2	topics5_12St_BHinge_DBE_1_ShearNormalized_07_window2.png	topics5_12St_FiberConstSt_DBE_1_ShearNormalized_07_window2.png	topics5_12St_BHinge_Serv_1_ShearNormalized_07_window2.png	2.61	7	2	1_ShearNormalized	3	FALSE	topic	correct	TRUE
407	875883aa-655b-11e9-9462-44a84224eb5b	2	1	signals12St_BHinge_DBE_1_ShearNormalized_30_window1.png	signals12St_FiberNomSt_DBE_1_ShearNormalized_30_window1.png	signals12St_BHinge_MCE_1_ShearNormalized_30_window1.png	7.59	30	1	1_ShearNormalized	1	TRUE	heatmap	incorrect	FALSE
408	875883aa-655b-11e9-9462-44a84224eb5b	1	2	signals12St_BHinge_DBE_1_ShearNormalized_07_window2.png	signals12St_BHinge_Serv_1_ShearNormalized_07_window2.png	signals12St_FiberConstSt_DBE_1_ShearNormalized_07_window2.png	2.09	7	2	1_ShearNormalized	3	TRUE	heatmap	incorrect	FALSE
409	875883aa-655b-11e9-9462-44a84224eb5b	1	1	signals12St_FiberTapSt_Serv_1_ShearNormalized_32_window0.png	signals12St_FiberConstSt_Serv_1_ShearNormalized_32_window0.png	signals12St_FiberNomSt_DBE_1_ShearNormalized_32_window0.png	3.26	32	0	1_ShearNormalized	2	TRUE	heatmap	correct	TRUE
410	875883aa-655b-11e9-9462-44a84224eb5b	1	1	topics5_12St_BHinge_DBE_1_ShearNormalized_13_window1.png	topics5_12St_BHinge_DBE_1_ShearNormalized_13_window1.png	topics5_12St_FiberConstSt_DBE_1_ShearNormalized_13_window1.png	1.87	13	1	1_ShearNormalized	0	FALSE	topic	correct	TRUE
411	8e0d4976-6527-11e9-892f-44a84224eb5b	2	2	signals12St_BHinge_DBE_1_ShearNormalized_24_window2.png	signals12St_FiberTapSt_DBE_1_ShearNormalized_24_window2.png	signals12St_BHinge_DBE_1_ShearNormalized_24_window2.png	2.67	24	2	1_ShearNormalized	0	TRUE	heatmap	correct	TRUE
412	8e0d4976-6527-11e9-892f-44a84224eb5b	1	1	signals12St_FiberNomSt_Serv_1_ShearNormalized_50_window0.png	signals12St_FiberConstSt_Serv_1_ShearNormalized_50_window0.png	signals12St_FiberTapSt_DBE_1_ShearNormalized_50_window0.png	3.59	50	0	1_ShearNormalized	2	TRUE	heatmap	correct	TRUE
413	8e0d4976-6527-11e9-892f-44a84224eb5b	2	2	signals12St_FiberTapSt_MCE_1_ShearNormalized_23_window0.png	signals12St_FiberNomSt_DBE_1_ShearNormalized_23_window0.png	signals12St_FiberConstSt_MCE_1_ShearNormalized_23_window0.png	1.87	23	0	1_ShearNormalized	4	TRUE	heatmap	correct	TRUE
414	8e0d4976-6527-11e9-892f-44a84224eb5b	1	1	signals12St_FiberTapSt_Serv_1_ShearNormalized_14_window2.png	signals12St_FiberNomSt_Serv_1_ShearNormalized_14_window2.png	signals12St_FiberConstSt_DBE_1_ShearNormalized_14_window2.png	1.73	14	2	1_ShearNormalized	2	TRUE	heatmap	correct	TRUE
415	8e0d4976-6527-11e9-892f-44a84224eb5b	2	2	signals12St_BHinge_MCE_1_ShearNormalized_32_window0.png	signals12St_FiberNomSt_MCE_1_ShearNormalized_32_window0.png	signals12St_BHinge_DBE_1_ShearNormalized_32_window0.png	3.52	32	0	1_ShearNormalized	1	TRUE	heatmap	correct	TRUE
416	8e0d4976-6527-11e9-892f-44a84224eb5b	2	2	topics5_12St_BHinge_DBE_1_ShearNormalized_11_window2.png	topics5_12St_FiberConstSt_DBE_1_ShearNormalized_11_window2.png	topics5_12St_BHinge_Serv_1_ShearNormalized_11_window2.png	5.88	11	2	1_ShearNormalized	3	FALSE	topic	correct	TRUE
417	8e0d4976-6527-11e9-892f-44a84224eb5b	1	1	signals12St_FiberNomSt_Serv_1_ShearNormalized_44_window1.png	signals12St_FiberTapSt_Serv_1_ShearNormalized_44_window1.png	signals12St_FiberConstSt_DBE_1_ShearNormalized_44_window1.png	1.84	44	1	1_ShearNormalized	2	TRUE	heatmap	correct	TRUE
418	8e0d4976-6527-11e9-892f-44a84224eb5b	2	2	signals12St_FiberNomSt_MCE_1_ShearNormalized_15_window2.png	signals12St_FiberConstSt_DBE_1_ShearNormalized_15_window2.png	signals12St_FiberTapSt_MCE_1_ShearNormalized_15_window2.png	1.83	15	2	1_ShearNormalized	4	TRUE	heatmap	correct	TRUE
419	8e0d4976-6527-11e9-892f-44a84224eb5b	2	2	signals12St_BHinge_MCE_1_ShearNormalized_35_window2.png	signals12St_FiberNomSt_MCE_1_ShearNormalized_35_window2.png	signals12St_BHinge_DBE_1_ShearNormalized_35_window2.png	2.18	35	2	1_ShearNormalized	1	TRUE	heatmap	correct	TRUE
420	8e0d4976-6527-11e9-892f-44a84224eb5b	2	2	signals12St_FiberConstSt_MCE_1_ShearNormalized_18_window1.png	signals12St_FiberNomSt_DBE_1_ShearNormalized_18_window1.png	signals12St_FiberTapSt_MCE_1_ShearNormalized_18_window1.png	2.64	18	1	1_ShearNormalized	4	TRUE	heatmap	correct	TRUE
421	8e0d4976-6527-11e9-892f-44a84224eb5b	2	2	topics5_12St_FiberNomSt_Serv_1_ShearNormalized_50_window0.png	topics5_12St_FiberTapSt_DBE_1_ShearNormalized_50_window0.png	topics5_12St_FiberConstSt_Serv_1_ShearNormalized_50_window0.png	3.74	50	0	1_ShearNormalized	2	FALSE	topic	correct	TRUE
422	8e0d4976-6527-11e9-892f-44a84224eb5b	1	1	topics5_12St_FiberConstSt_MCE_1_ShearNormalized_48_window0.png	topics5_12St_FiberNomSt_MCE_1_ShearNormalized_48_window0.png	topics5_12St_FiberTapSt_DBE_1_ShearNormalized_48_window0.png	5.72	48	0	1_ShearNormalized	4	FALSE	topic	correct	TRUE
423	8e0d4976-6527-11e9-892f-44a84224eb5b	1	1	topics5_12St_BHinge_DBE_1_ShearNormalized_34_window2.png	topics5_12St_BHinge_DBE_1_ShearNormalized_34_window2.png	topics5_12St_FiberConstSt_DBE_1_ShearNormalized_34_window2.png	2.04	34	2	1_ShearNormalized	0	FALSE	topic	correct	TRUE
424	8e0d4976-6527-11e9-892f-44a84224eb5b	1	2	topics5_12St_FiberNomSt_MCE_1_ShearNormalized_15_window2.png	topics5_12St_FiberTapSt_MCE_1_ShearNormalized_15_window2.png	topics5_12St_FiberConstSt_DBE_1_ShearNormalized_15_window2.png	6.26	15	2	1_ShearNormalized	4	FALSE	topic	incorrect	FALSE
425	8e0d4976-6527-11e9-892f-44a84224eb5b	1	2	signals12St_BHinge_Serv_1_ShearNormalized_25_window0.png	signals12St_BHinge_MCE_1_ShearNormalized_25_window0.png	signals12St_FiberNomSt_Serv_1_ShearNormalized_25_window0.png	2.49	25	0	1_ShearNormalized	3	TRUE	heatmap	incorrect	FALSE
426	8e0d4976-6527-11e9-892f-44a84224eb5b	2	2	topics5_12St_BHinge_Serv_1_ShearNormalized_10_window2.png	topics5_12St_FiberTapSt_Serv_1_ShearNormalized_10_window2.png	topics5_12St_BHinge_MCE_1_ShearNormalized_10_window2.png	3.31	10	2	1_ShearNormalized	3	FALSE	topic	correct	TRUE
427	8e0d4976-6527-11e9-892f-44a84224eb5b	1	2	signals12St_BHinge_MCE_1_ShearNormalized_06_window2.png	signals12St_BHinge_Serv_1_ShearNormalized_06_window2.png	signals12St_FiberConstSt_MCE_1_ShearNormalized_06_window2.png	1.54	6	2	1_ShearNormalized	3	TRUE	heatmap	incorrect	FALSE
428	8e0d4976-6527-11e9-892f-44a84224eb5b	1	2	topics5_12St_FiberConstSt_MCE_1_ShearNormalized_18_window1.png	topics5_12St_FiberTapSt_MCE_1_ShearNormalized_18_window1.png	topics5_12St_FiberNomSt_DBE_1_ShearNormalized_18_window1.png	5.99	18	1	1_ShearNormalized	4	FALSE	topic	incorrect	FALSE
429	8e0d4976-6527-11e9-892f-44a84224eb5b	2	2	topics5_12St_FiberTapSt_Serv_1_ShearNormalized_14_window2.png	topics5_12St_FiberConstSt_DBE_1_ShearNormalized_14_window2.png	topics5_12St_FiberNomSt_Serv_1_ShearNormalized_14_window2.png	1.79	14	2	1_ShearNormalized	2	FALSE	topic	correct	TRUE
430	8e0d4976-6527-11e9-892f-44a84224eb5b	1	1	topics5_12St_BHinge_MCE_1_ShearNormalized_32_window0.png	topics5_12St_BHinge_DBE_1_ShearNormalized_32_window0.png	topics5_12St_FiberNomSt_MCE_1_ShearNormalized_32_window0.png	1.65	32	0	1_ShearNormalized	1	FALSE	topic	correct	TRUE
431	8e0d4976-6527-11e9-892f-44a84224eb5b	2	2	topics5_12St_FiberConstSt_Serv_1_ShearNormalized_10_window1.png	topics5_12St_FiberTapSt_DBE_1_ShearNormalized_10_window1.png	topics5_12St_FiberNomSt_Serv_1_ShearNormalized_10_window1.png	1.43	10	1	1_ShearNormalized	2	FALSE	topic	correct	TRUE
432	8e0d4976-6527-11e9-892f-44a84224eb5b	1	2	signals12St_BHinge_Serv_1_ShearNormalized_10_window2.png	signals12St_BHinge_MCE_1_ShearNormalized_10_window2.png	signals12St_FiberTapSt_Serv_1_ShearNormalized_10_window2.png	2.29	10	2	1_ShearNormalized	3	TRUE	heatmap	incorrect	FALSE
433	8e0d4976-6527-11e9-892f-44a84224eb5b	2	2	signals12St_FiberConstSt_MCE_1_ShearNormalized_48_window0.png	signals12St_FiberTapSt_DBE_1_ShearNormalized_48_window0.png	signals12St_FiberNomSt_MCE_1_ShearNormalized_48_window0.png	2.64	48	0	1_ShearNormalized	4	TRUE	heatmap	correct	TRUE
434	8e0d4976-6527-11e9-892f-44a84224eb5b	2	2	topics5_12St_BHinge_MCE_1_ShearNormalized_06_window2.png	topics5_12St_FiberConstSt_MCE_1_ShearNormalized_06_window2.png	topics5_12St_BHinge_Serv_1_ShearNormalized_06_window2.png	4.71	6	2	1_ShearNormalized	3	FALSE	topic	correct	TRUE
435	8e0d4976-6527-11e9-892f-44a84224eb5b	2	2	topics5_12St_BHinge_Serv_1_ShearNormalized_25_window0.png	topics5_12St_FiberNomSt_Serv_1_ShearNormalized_25_window0.png	topics5_12St_BHinge_MCE_1_ShearNormalized_25_window0.png	2.42	25	0	1_ShearNormalized	3	FALSE	topic	correct	TRUE
436	8e0d4976-6527-11e9-892f-44a84224eb5b	1	1	topics5_12St_BHinge_DBE_1_ShearNormalized_24_window2.png	topics5_12St_BHinge_DBE_1_ShearNormalized_24_window2.png	topics5_12St_FiberTapSt_DBE_1_ShearNormalized_24_window2.png	1.64	24	2	1_ShearNormalized	0	FALSE	topic	correct	TRUE
437	8e0d4976-6527-11e9-892f-44a84224eb5b	1	2	topics5_12St_FiberTapSt_MCE_1_ShearNormalized_23_window0.png	topics5_12St_FiberConstSt_MCE_1_ShearNormalized_23_window0.png	topics5_12St_FiberNomSt_DBE_1_ShearNormalized_23_window0.png	1.96	23	0	1_ShearNormalized	4	FALSE	topic	incorrect	FALSE
438	8e0d4976-6527-11e9-892f-44a84224eb5b	2	2	signals12St_BHinge_DBE_1_ShearNormalized_34_window2.png	signals12St_FiberConstSt_DBE_1_ShearNormalized_34_window2.png	signals12St_BHinge_DBE_1_ShearNormalized_34_window2.png	1.58	34	2	1_ShearNormalized	0	TRUE	heatmap	correct	TRUE
439	8e0d4976-6527-11e9-892f-44a84224eb5b	1	2	signals12St_BHinge_DBE_1_ShearNormalized_11_window2.png	signals12St_BHinge_Serv_1_ShearNormalized_11_window2.png	signals12St_FiberConstSt_DBE_1_ShearNormalized_11_window2.png	1.57	11	2	1_ShearNormalized	3	TRUE	heatmap	incorrect	FALSE
440	8e0d4976-6527-11e9-892f-44a84224eb5b	2	2	topics5_12St_FiberNomSt_Serv_1_ShearNormalized_44_window1.png	topics5_12St_FiberConstSt_DBE_1_ShearNormalized_44_window1.png	topics5_12St_FiberTapSt_Serv_1_ShearNormalized_44_window1.png	1.49	44	1	1_ShearNormalized	2	FALSE	topic	correct	TRUE
441	8e0d4976-6527-11e9-892f-44a84224eb5b	1	2	signals12St_BHinge_Serv_1_ShearNormalized_41_window2.png	signals12St_BHinge_DBE_1_ShearNormalized_41_window2.png	signals12St_FiberConstSt_Serv_1_ShearNormalized_41_window2.png	2.08	41	2	1_ShearNormalized	3	TRUE	heatmap	incorrect	FALSE
442	8e0d4976-6527-11e9-892f-44a84224eb5b	2	2	topics5_12St_BHinge_Serv_1_ShearNormalized_41_window2.png	topics5_12St_FiberConstSt_Serv_1_ShearNormalized_41_window2.png	topics5_12St_BHinge_DBE_1_ShearNormalized_41_window2.png	2.04	41	2	1_ShearNormalized	3	FALSE	topic	correct	TRUE
443	8e0d4976-6527-11e9-892f-44a84224eb5b	1	1	signals12St_FiberConstSt_Serv_1_ShearNormalized_10_window1.png	signals12St_FiberNomSt_Serv_1_ShearNormalized_10_window1.png	signals12St_FiberTapSt_DBE_1_ShearNormalized_10_window1.png	1.78	10	1	1_ShearNormalized	2	TRUE	heatmap	correct	TRUE
444	8e0d4976-6527-11e9-892f-44a84224eb5b	1	1	topics5_12St_BHinge_MCE_1_ShearNormalized_35_window2.png	topics5_12St_BHinge_DBE_1_ShearNormalized_35_window2.png	topics5_12St_FiberNomSt_MCE_1_ShearNormalized_35_window2.png	2.26	35	2	1_ShearNormalized	1	FALSE	topic	correct	TRUE
445	c801a61a-651b-11e9-b364-44a84224eb5b	1	1	signals12St_FiberConstSt_Serv_1_ShearNormalized_24_window2.png	signals12St_FiberTapSt_Serv_1_ShearNormalized_24_window2.png	signals12St_FiberNomSt_MCE_1_ShearNormalized_24_window2.png	3.81	24	2	1_ShearNormalized	2	TRUE	heatmap	correct	TRUE
446	c801a61a-651b-11e9-b364-44a84224eb5b	1	1	signals12St_BHinge_Serv_1_ShearNormalized_10_window2.png	signals12St_BHinge_DBE_1_ShearNormalized_10_window2.png	signals12St_FiberNomSt_Serv_1_ShearNormalized_10_window2.png	7.87	10	2	1_ShearNormalized	3	TRUE	heatmap	correct	TRUE
447	c801a61a-651b-11e9-b364-44a84224eb5b	1	1	signals12St_FiberNomSt_Serv_1_ShearNormalized_21_window1.png	signals12St_FiberConstSt_Serv_1_ShearNormalized_21_window1.png	signals12St_FiberTapSt_DBE_1_ShearNormalized_21_window1.png	10.61	21	1	1_ShearNormalized	2	TRUE	heatmap	correct	TRUE
448	c801a61a-651b-11e9-b364-44a84224eb5b	1	1	topics5_12St_BHinge_MCE_1_ShearNormalized_09_window2.png	topics5_12St_BHinge_MCE_1_ShearNormalized_09_window2.png	topics5_12St_FiberNomSt_MCE_1_ShearNormalized_09_window2.png	3.53	9	2	1_ShearNormalized	0	FALSE	topic	correct	TRUE
449	c801a61a-651b-11e9-b364-44a84224eb5b	2	2	signals12St_BHinge_MCE_1_ShearNormalized_09_window2.png	signals12St_FiberNomSt_MCE_1_ShearNormalized_09_window2.png	signals12St_BHinge_MCE_1_ShearNormalized_09_window2.png	13.95	9	2	1_ShearNormalized	0	TRUE	heatmap	correct	TRUE
450	c801a61a-651b-11e9-b364-44a84224eb5b	1	1	signals12St_FiberTapSt_Serv_1_ShearNormalized_13_window0.png	signals12St_FiberConstSt_Serv_1_ShearNormalized_13_window0.png	signals12St_FiberNomSt_MCE_1_ShearNormalized_13_window0.png	5.1	13	0	1_ShearNormalized	2	TRUE	heatmap	correct	TRUE
451	c801a61a-651b-11e9-b364-44a84224eb5b	1	1	signals12St_FiberConstSt_Serv_1_ShearNormalized_28_window2.png	signals12St_FiberTapSt_Serv_1_ShearNormalized_28_window2.png	signals12St_FiberNomSt_DBE_1_ShearNormalized_28_window2.png	3.03	28	2	1_ShearNormalized	2	TRUE	heatmap	correct	TRUE
452	c801a61a-651b-11e9-b364-44a84224eb5b	1	1	topics5_12St_BHinge_DBE_1_ShearNormalized_19_window1.png	topics5_12St_BHinge_MCE_1_ShearNormalized_19_window1.png	topics5_12St_FiberNomSt_DBE_1_ShearNormalized_19_window1.png	2.29	19	1	1_ShearNormalized	1	FALSE	topic	correct	TRUE
453	c801a61a-651b-11e9-b364-44a84224eb5b	1	1	topics5_12St_BHinge_MCE_1_ShearNormalized_36_window1.png	topics5_12St_BHinge_MCE_1_ShearNormalized_36_window1.png	topics5_12St_FiberTapSt_MCE_1_ShearNormalized_36_window1.png	1.98	36	1	1_ShearNormalized	0	FALSE	topic	correct	TRUE
454	c801a61a-651b-11e9-b364-44a84224eb5b	1	1	signals12St_FiberConstSt_Serv_1_ShearNormalized_29_window2.png	signals12St_FiberTapSt_Serv_1_ShearNormalized_29_window2.png	signals12St_FiberNomSt_DBE_1_ShearNormalized_29_window2.png	2.9	29	2	1_ShearNormalized	2	TRUE	heatmap	correct	TRUE
455	c801a61a-651b-11e9-b364-44a84224eb5b	2	2	topics5_12St_FiberNomSt_Serv_1_ShearNormalized_21_window1.png	topics5_12St_FiberTapSt_DBE_1_ShearNormalized_21_window1.png	topics5_12St_FiberConstSt_Serv_1_ShearNormalized_21_window1.png	2.61	21	1	1_ShearNormalized	2	FALSE	topic	correct	TRUE
456	c801a61a-651b-11e9-b364-44a84224eb5b	1	1	signals12St_FiberTapSt_Serv_1_ShearNormalized_32_window0.png	signals12St_FiberConstSt_Serv_1_ShearNormalized_32_window0.png	signals12St_FiberNomSt_MCE_1_ShearNormalized_32_window0.png	2.91	32	0	1_ShearNormalized	2	TRUE	heatmap	correct	TRUE
457	c801a61a-651b-11e9-b364-44a84224eb5b	2	1	signals12St_BHinge_DBE_1_ShearNormalized_19_window1.png	signals12St_FiberNomSt_DBE_1_ShearNormalized_19_window1.png	signals12St_BHinge_MCE_1_ShearNormalized_19_window1.png	3.37	19	1	1_ShearNormalized	1	TRUE	heatmap	incorrect	FALSE
458	c801a61a-651b-11e9-b364-44a84224eb5b	2	2	topics5_12St_BHinge_Serv_1_ShearNormalized_15_window1.png	topics5_12St_FiberTapSt_Serv_1_ShearNormalized_15_window1.png	topics5_12St_BHinge_DBE_1_ShearNormalized_15_window1.png	3.54	15	1	1_ShearNormalized	3	FALSE	topic	correct	TRUE
459	c801a61a-651b-11e9-b364-44a84224eb5b	1	2	topics5_12St_BHinge_MCE_1_ShearNormalized_29_window2.png	topics5_12St_BHinge_DBE_1_ShearNormalized_29_window2.png	topics5_12St_FiberConstSt_MCE_1_ShearNormalized_29_window2.png	0.59	29	2	1_ShearNormalized	1	FALSE	topic	incorrect	FALSE
460	c801a61a-651b-11e9-b364-44a84224eb5b	2	2	topics5_12St_BHinge_Serv_1_ShearNormalized_10_window2.png	topics5_12St_FiberNomSt_Serv_1_ShearNormalized_10_window2.png	topics5_12St_BHinge_DBE_1_ShearNormalized_10_window2.png	2.44	10	2	1_ShearNormalized	3	FALSE	topic	correct	TRUE
461	c801a61a-651b-11e9-b364-44a84224eb5b	2	2	signals12St_BHinge_MCE_1_ShearNormalized_29_window2.png	signals12St_FiberConstSt_MCE_1_ShearNormalized_29_window2.png	signals12St_BHinge_DBE_1_ShearNormalized_29_window2.png	3.08	29	2	1_ShearNormalized	1	TRUE	heatmap	correct	TRUE
462	c801a61a-651b-11e9-b364-44a84224eb5b	2	2	topics5_12St_BHinge_Serv_1_ShearNormalized_39_window2.png	topics5_12St_FiberConstSt_Serv_1_ShearNormalized_39_window2.png	topics5_12St_BHinge_MCE_1_ShearNormalized_39_window2.png	1.51	39	2	1_ShearNormalized	3	FALSE	topic	correct	TRUE
463	c801a61a-651b-11e9-b364-44a84224eb5b	2	2	topics5_12St_FiberConstSt_Serv_1_ShearNormalized_29_window2.png	topics5_12St_FiberNomSt_DBE_1_ShearNormalized_29_window2.png	topics5_12St_FiberTapSt_Serv_1_ShearNormalized_29_window2.png	1.92	29	2	1_ShearNormalized	2	FALSE	topic	correct	TRUE
464	c801a61a-651b-11e9-b364-44a84224eb5b	2	2	signals12St_FiberConstSt_MCE_1_ShearNormalized_38_window0.png	signals12St_FiberNomSt_DBE_1_ShearNormalized_38_window0.png	signals12St_FiberTapSt_MCE_1_ShearNormalized_38_window0.png	3.42	38	0	1_ShearNormalized	4	TRUE	heatmap	correct	TRUE
465	c801a61a-651b-11e9-b364-44a84224eb5b	2	2	topics5_12St_FiberConstSt_Serv_1_ShearNormalized_28_window2.png	topics5_12St_FiberNomSt_DBE_1_ShearNormalized_28_window2.png	topics5_12St_FiberTapSt_Serv_1_ShearNormalized_28_window2.png	1.79	28	2	1_ShearNormalized	2	FALSE	topic	correct	TRUE
466	c801a61a-651b-11e9-b364-44a84224eb5b	2	2	topics5_12St_FiberConstSt_Serv_1_ShearNormalized_31_window1.png	topics5_12St_FiberTapSt_DBE_1_ShearNormalized_31_window1.png	topics5_12St_FiberNomSt_Serv_1_ShearNormalized_31_window1.png	1.68	31	1	1_ShearNormalized	2	FALSE	topic	correct	TRUE
467	c801a61a-651b-11e9-b364-44a84224eb5b	2	2	topics5_12St_FiberTapSt_Serv_1_ShearNormalized_32_window0.png	topics5_12St_FiberNomSt_MCE_1_ShearNormalized_32_window0.png	topics5_12St_FiberConstSt_Serv_1_ShearNormalized_32_window0.png	4.81	32	0	1_ShearNormalized	2	FALSE	topic	correct	TRUE
468	c801a61a-651b-11e9-b364-44a84224eb5b	1	2	signals12St_BHinge_Serv_1_ShearNormalized_39_window2.png	signals12St_BHinge_MCE_1_ShearNormalized_39_window2.png	signals12St_FiberConstSt_Serv_1_ShearNormalized_39_window2.png	3.46	39	2	1_ShearNormalized	3	TRUE	heatmap	incorrect	FALSE
469	c801a61a-651b-11e9-b364-44a84224eb5b	1	2	signals12St_BHinge_Serv_1_ShearNormalized_15_window1.png	signals12St_BHinge_DBE_1_ShearNormalized_15_window1.png	signals12St_FiberTapSt_Serv_1_ShearNormalized_15_window1.png	6.22	15	1	1_ShearNormalized	3	TRUE	heatmap	incorrect	FALSE
470	c801a61a-651b-11e9-b364-44a84224eb5b	1	1	signals12St_FiberConstSt_Serv_1_ShearNormalized_31_window1.png	signals12St_FiberNomSt_Serv_1_ShearNormalized_31_window1.png	signals12St_FiberTapSt_DBE_1_ShearNormalized_31_window1.png	3.03	31	1	1_ShearNormalized	2	TRUE	heatmap	correct	TRUE
471	c801a61a-651b-11e9-b364-44a84224eb5b	2	2	topics5_12St_FiberTapSt_Serv_1_ShearNormalized_13_window0.png	topics5_12St_FiberNomSt_MCE_1_ShearNormalized_13_window0.png	topics5_12St_FiberConstSt_Serv_1_ShearNormalized_13_window0.png	2.57	13	0	1_ShearNormalized	2	FALSE	topic	correct	TRUE
472	c801a61a-651b-11e9-b364-44a84224eb5b	1	2	signals12St_BHinge_Serv_1_ShearNormalized_12_window1.png	signals12St_BHinge_MCE_1_ShearNormalized_12_window1.png	signals12St_FiberNomSt_Serv_1_ShearNormalized_12_window1.png	2.95	12	1	1_ShearNormalized	3	TRUE	heatmap	incorrect	FALSE
473	c801a61a-651b-11e9-b364-44a84224eb5b	2	1	signals12St_BHinge_DBE_1_ShearNormalized_36_window2.png	signals12St_FiberTapSt_DBE_1_ShearNormalized_36_window2.png	signals12St_BHinge_MCE_1_ShearNormalized_36_window2.png	8.96	36	2	1_ShearNormalized	1	TRUE	heatmap	incorrect	FALSE
474	c801a61a-651b-11e9-b364-44a84224eb5b	1	1	topics5_12St_BHinge_DBE_1_ShearNormalized_36_window2.png	topics5_12St_BHinge_MCE_1_ShearNormalized_36_window2.png	topics5_12St_FiberTapSt_DBE_1_ShearNormalized_36_window2.png	4	36	2	1_ShearNormalized	1	FALSE	topic	correct	TRUE
475	c801a61a-651b-11e9-b364-44a84224eb5b	1	1	topics5_12St_FiberConstSt_MCE_1_ShearNormalized_38_window0.png	topics5_12St_FiberTapSt_MCE_1_ShearNormalized_38_window0.png	topics5_12St_FiberNomSt_DBE_1_ShearNormalized_38_window0.png	9.46	38	0	1_ShearNormalized	4	FALSE	topic	correct	TRUE
476	c801a61a-651b-11e9-b364-44a84224eb5b	2	2	signals12St_BHinge_MCE_1_ShearNormalized_36_window1.png	signals12St_FiberTapSt_MCE_1_ShearNormalized_36_window1.png	signals12St_BHinge_MCE_1_ShearNormalized_36_window1.png	2.2	36	1	1_ShearNormalized	0	TRUE	heatmap	correct	TRUE
477	c801a61a-651b-11e9-b364-44a84224eb5b	2	2	topics5_12St_FiberConstSt_Serv_1_ShearNormalized_24_window2.png	topics5_12St_FiberNomSt_MCE_1_ShearNormalized_24_window2.png	topics5_12St_FiberTapSt_Serv_1_ShearNormalized_24_window2.png	1.53	24	2	1_ShearNormalized	2	FALSE	topic	correct	TRUE
478	c801a61a-651b-11e9-b364-44a84224eb5b	2	2	topics5_12St_BHinge_Serv_1_ShearNormalized_12_window1.png	topics5_12St_FiberNomSt_Serv_1_ShearNormalized_12_window1.png	topics5_12St_BHinge_MCE_1_ShearNormalized_12_window1.png	2.13	12	1	1_ShearNormalized	3	FALSE	topic	correct	TRUE
479	d4cd4da0-651a-11e9-8478-44a84224eb5b	2	2	topics5_12St_FiberTapSt_Serv_1_ShearNormalized_33_window0.png	topics5_12St_FiberNomSt_DBE_1_ShearNormalized_33_window0.png	topics5_12St_FiberConstSt_Serv_1_ShearNormalized_33_window0.png	5.54	33	0	1_ShearNormalized	2	FALSE	topic	correct	TRUE
480	d4cd4da0-651a-11e9-8478-44a84224eb5b	1	2	signals12St_BHinge_Serv_1_ShearNormalized_26_window2.png	signals12St_BHinge_MCE_1_ShearNormalized_26_window2.png	signals12St_FiberNomSt_Serv_1_ShearNormalized_26_window2.png	1.06	26	2	1_ShearNormalized	3	TRUE	heatmap	incorrect	FALSE
481	d4cd4da0-651a-11e9-8478-44a84224eb5b	1	1	signals12St_FiberConstSt_Serv_1_ShearNormalized_41_window1.png	signals12St_FiberNomSt_Serv_1_ShearNormalized_41_window1.png	signals12St_FiberTapSt_MCE_1_ShearNormalized_41_window1.png	4.47	41	1	1_ShearNormalized	2	TRUE	heatmap	correct	TRUE
482	d4cd4da0-651a-11e9-8478-44a84224eb5b	2	1	signals12St_FiberTapSt_MCE_1_ShearNormalized_28_window1.png	signals12St_FiberConstSt_DBE_1_ShearNormalized_28_window1.png	signals12St_FiberNomSt_MCE_1_ShearNormalized_28_window1.png	6.61	28	1	1_ShearNormalized	4	TRUE	heatmap	incorrect	FALSE
483	d4cd4da0-651a-11e9-8478-44a84224eb5b	2	2	topics5_12St_BHinge_Serv_1_ShearNormalized_35_window2.png	topics5_12St_FiberConstSt_Serv_1_ShearNormalized_35_window2.png	topics5_12St_BHinge_MCE_1_ShearNormalized_35_window2.png	2.54	35	2	1_ShearNormalized	3	FALSE	topic	correct	TRUE
484	d4cd4da0-651a-11e9-8478-44a84224eb5b	1	1	topics5_12St_FiberTapSt_MCE_1_ShearNormalized_25_window2.png	topics5_12St_FiberConstSt_MCE_1_ShearNormalized_25_window2.png	topics5_12St_FiberNomSt_DBE_1_ShearNormalized_25_window2.png	6.87	25	2	1_ShearNormalized	4	FALSE	topic	correct	TRUE
485	d4cd4da0-651a-11e9-8478-44a84224eb5b	2	2	topics5_12St_BHinge_DBE_1_ShearNormalized_36_window0.png	topics5_12St_FiberTapSt_DBE_1_ShearNormalized_36_window0.png	topics5_12St_BHinge_Serv_1_ShearNormalized_36_window0.png	7.35	36	0	1_ShearNormalized	3	FALSE	topic	correct	TRUE
486	d4cd4da0-651a-11e9-8478-44a84224eb5b	1	1	signals12St_FiberTapSt_Serv_1_ShearNormalized_39_window0.png	signals12St_FiberNomSt_Serv_1_ShearNormalized_39_window0.png	signals12St_FiberConstSt_MCE_1_ShearNormalized_39_window0.png	3.89	39	0	1_ShearNormalized	2	TRUE	heatmap	correct	TRUE
487	d4cd4da0-651a-11e9-8478-44a84224eb5b	1	2	signals12St_BHinge_Serv_1_ShearNormalized_41_window2.png	signals12St_BHinge_DBE_1_ShearNormalized_41_window2.png	signals12St_FiberTapSt_Serv_1_ShearNormalized_41_window2.png	4.18	41	2	1_ShearNormalized	3	TRUE	heatmap	incorrect	FALSE
488	d4cd4da0-651a-11e9-8478-44a84224eb5b	1	1	topics5_12St_BHinge_DBE_1_ShearNormalized_18_window2.png	topics5_12St_BHinge_DBE_1_ShearNormalized_18_window2.png	topics5_12St_FiberTapSt_DBE_1_ShearNormalized_18_window2.png	4.13	18	2	1_ShearNormalized	0	FALSE	topic	correct	TRUE
489	d4cd4da0-651a-11e9-8478-44a84224eb5b	1	2	signals12St_BHinge_Serv_1_ShearNormalized_18_window2.png	signals12St_BHinge_MCE_1_ShearNormalized_18_window2.png	signals12St_FiberTapSt_Serv_1_ShearNormalized_18_window2.png	5.61	18	2	1_ShearNormalized	3	TRUE	heatmap	incorrect	FALSE
490	d4cd4da0-651a-11e9-8478-44a84224eb5b	2	2	topics5_12St_BHinge_Serv_1_ShearNormalized_18_window2.png	topics5_12St_FiberTapSt_Serv_1_ShearNormalized_18_window2.png	topics5_12St_BHinge_MCE_1_ShearNormalized_18_window2.png	1.11	18	2	1_ShearNormalized	3	FALSE	topic	correct	TRUE
491	d4cd4da0-651a-11e9-8478-44a84224eb5b	1	1	topics5_12St_FiberTapSt_MCE_1_ShearNormalized_28_window1.png	topics5_12St_FiberNomSt_MCE_1_ShearNormalized_28_window1.png	topics5_12St_FiberConstSt_DBE_1_ShearNormalized_28_window1.png	6.81	28	1	1_ShearNormalized	4	FALSE	topic	correct	TRUE
492	d4cd4da0-651a-11e9-8478-44a84224eb5b	2	2	signals12St_BHinge_DBE_1_ShearNormalized_15_window1.png	signals12St_FiberNomSt_DBE_1_ShearNormalized_15_window1.png	signals12St_BHinge_DBE_1_ShearNormalized_15_window1.png	8.52	15	1	1_ShearNormalized	0	TRUE	heatmap	correct	TRUE
493	d4cd4da0-651a-11e9-8478-44a84224eb5b	2	2	signals12St_FiberTapSt_MCE_1_ShearNormalized_25_window2.png	signals12St_FiberNomSt_DBE_1_ShearNormalized_25_window2.png	signals12St_FiberConstSt_MCE_1_ShearNormalized_25_window2.png	7	25	2	1_ShearNormalized	4	TRUE	heatmap	correct	TRUE
494	d4cd4da0-651a-11e9-8478-44a84224eb5b	2	1	topics5_12St_BHinge_Serv_1_ShearNormalized_26_window2.png	topics5_12St_FiberNomSt_Serv_1_ShearNormalized_26_window2.png	topics5_12St_BHinge_MCE_1_ShearNormalized_26_window2.png	7.8	26	2	1_ShearNormalized	3	FALSE	topic	incorrect	FALSE
495	d4cd4da0-651a-11e9-8478-44a84224eb5b	2	2	topics5_12St_FiberTapSt_Serv_1_ShearNormalized_13_window2.png	topics5_12St_FiberConstSt_DBE_1_ShearNormalized_13_window2.png	topics5_12St_FiberNomSt_Serv_1_ShearNormalized_13_window2.png	3.93	13	2	1_ShearNormalized	2	FALSE	topic	correct	TRUE
496	d4cd4da0-651a-11e9-8478-44a84224eb5b	2	2	topics5_12St_FiberNomSt_Serv_1_ShearNormalized_24_window2.png	topics5_12St_FiberTapSt_MCE_1_ShearNormalized_24_window2.png	topics5_12St_FiberConstSt_Serv_1_ShearNormalized_24_window2.png	6.03	24	2	1_ShearNormalized	2	FALSE	topic	correct	TRUE
497	d4cd4da0-651a-11e9-8478-44a84224eb5b	1	1	signals12St_FiberConstSt_Serv_1_ShearNormalized_06_window1.png	signals12St_FiberNomSt_Serv_1_ShearNormalized_06_window1.png	signals12St_FiberTapSt_MCE_1_ShearNormalized_06_window1.png	3.57	6	1	1_ShearNormalized	2	TRUE	heatmap	correct	TRUE
498	d4cd4da0-651a-11e9-8478-44a84224eb5b	1	2	signals12St_BHinge_Serv_1_ShearNormalized_35_window2.png	signals12St_BHinge_MCE_1_ShearNormalized_35_window2.png	signals12St_FiberConstSt_Serv_1_ShearNormalized_35_window2.png	5.58	35	2	1_ShearNormalized	3	TRUE	heatmap	incorrect	FALSE
499	d4cd4da0-651a-11e9-8478-44a84224eb5b	1	1	signals12St_FiberNomSt_Serv_1_ShearNormalized_24_window2.png	signals12St_FiberConstSt_Serv_1_ShearNormalized_24_window2.png	signals12St_FiberTapSt_MCE_1_ShearNormalized_24_window2.png	2.99	24	2	1_ShearNormalized	2	TRUE	heatmap	correct	TRUE
500	d4cd4da0-651a-11e9-8478-44a84224eb5b	2	2	topics5_12St_FiberNomSt_Serv_1_ShearNormalized_18_window0.png	topics5_12St_FiberTapSt_MCE_1_ShearNormalized_18_window0.png	topics5_12St_FiberConstSt_Serv_1_ShearNormalized_18_window0.png	6.76	18	0	1_ShearNormalized	2	FALSE	topic	correct	TRUE
501	d4cd4da0-651a-11e9-8478-44a84224eb5b	2	2	signals12St_BHinge_DBE_1_ShearNormalized_18_window2.png	signals12St_FiberTapSt_DBE_1_ShearNormalized_18_window2.png	signals12St_BHinge_DBE_1_ShearNormalized_18_window2.png	3.93	18	2	1_ShearNormalized	0	TRUE	heatmap	correct	TRUE
502	d4cd4da0-651a-11e9-8478-44a84224eb5b	1	1	signals12St_BHinge_DBE_1_ShearNormalized_36_window0.png	signals12St_BHinge_Serv_1_ShearNormalized_36_window0.png	signals12St_FiberTapSt_DBE_1_ShearNormalized_36_window0.png	2.96	36	0	1_ShearNormalized	3	TRUE	heatmap	correct	TRUE
503	d4cd4da0-651a-11e9-8478-44a84224eb5b	1	1	signals12St_FiberNomSt_Serv_1_ShearNormalized_18_window0.png	signals12St_FiberConstSt_Serv_1_ShearNormalized_18_window0.png	signals12St_FiberTapSt_MCE_1_ShearNormalized_18_window0.png	3.21	18	0	1_ShearNormalized	2	TRUE	heatmap	correct	TRUE
504	d4cd4da0-651a-11e9-8478-44a84224eb5b	2	2	topics5_12St_FiberTapSt_Serv_1_ShearNormalized_43_window0.png	topics5_12St_FiberConstSt_DBE_1_ShearNormalized_43_window0.png	topics5_12St_FiberNomSt_Serv_1_ShearNormalized_43_window0.png	3.68	43	0	1_ShearNormalized	2	FALSE	topic	correct	TRUE
505	d4cd4da0-651a-11e9-8478-44a84224eb5b	2	2	topics5_12St_FiberTapSt_Serv_1_ShearNormalized_39_window0.png	topics5_12St_FiberConstSt_MCE_1_ShearNormalized_39_window0.png	topics5_12St_FiberNomSt_Serv_1_ShearNormalized_39_window0.png	6.22	39	0	1_ShearNormalized	2	FALSE	topic	correct	TRUE
506	d4cd4da0-651a-11e9-8478-44a84224eb5b	2	2	topics5_12St_FiberConstSt_Serv_1_ShearNormalized_06_window1.png	topics5_12St_FiberTapSt_MCE_1_ShearNormalized_06_window1.png	topics5_12St_FiberNomSt_Serv_1_ShearNormalized_06_window1.png	4.61	6	1	1_ShearNormalized	2	FALSE	topic	correct	TRUE
507	d4cd4da0-651a-11e9-8478-44a84224eb5b	1	1	signals12St_FiberTapSt_Serv_1_ShearNormalized_33_window0.png	signals12St_FiberConstSt_Serv_1_ShearNormalized_33_window0.png	signals12St_FiberNomSt_DBE_1_ShearNormalized_33_window0.png	4.74	33	0	1_ShearNormalized	2	TRUE	heatmap	correct	TRUE
508	d4cd4da0-651a-11e9-8478-44a84224eb5b	1	2	signals12St_FiberTapSt_Serv_1_ShearNormalized_13_window2.png	signals12St_FiberNomSt_Serv_1_ShearNormalized_13_window2.png	signals12St_FiberConstSt_DBE_1_ShearNormalized_13_window2.png	3.36	13	2	1_ShearNormalized	2	TRUE	heatmap	incorrect	FALSE
509	d4cd4da0-651a-11e9-8478-44a84224eb5b	1	1	signals12St_FiberTapSt_Serv_1_ShearNormalized_43_window0.png	signals12St_FiberNomSt_Serv_1_ShearNormalized_43_window0.png	signals12St_FiberConstSt_DBE_1_ShearNormalized_43_window0.png	6.77	43	0	1_ShearNormalized	2	TRUE	heatmap	correct	TRUE
510	d4cd4da0-651a-11e9-8478-44a84224eb5b	2	2	topics5_12St_FiberConstSt_Serv_1_ShearNormalized_41_window1.png	topics5_12St_FiberTapSt_MCE_1_ShearNormalized_41_window1.png	topics5_12St_FiberNomSt_Serv_1_ShearNormalized_41_window1.png	2.9	41	1	1_ShearNormalized	2	FALSE	topic	correct	TRUE
511	d4cd4da0-651a-11e9-8478-44a84224eb5b	1	1	topics5_12St_BHinge_DBE_1_ShearNormalized_15_window1.png	topics5_12St_BHinge_DBE_1_ShearNormalized_15_window1.png	topics5_12St_FiberNomSt_DBE_1_ShearNormalized_15_window1.png	5.35	15	1	1_ShearNormalized	0	FALSE	topic	correct	TRUE
512	d4cd4da0-651a-11e9-8478-44a84224eb5b	2	1	topics5_12St_BHinge_Serv_1_ShearNormalized_41_window2.png	topics5_12St_FiberTapSt_Serv_1_ShearNormalized_41_window2.png	topics5_12St_BHinge_DBE_1_ShearNormalized_41_window2.png	7.16	41	2	1_ShearNormalized	3	FALSE	topic	incorrect	FALSE
513	d4ecf5e4-653b-11e9-b700-44a84224eb5b	2	1	signals12St_FiberTapSt_MCE_1_ShearNormalized_19_window2.png	signals12St_FiberConstSt_DBE_1_ShearNormalized_19_window2.png	signals12St_FiberNomSt_MCE_1_ShearNormalized_19_window2.png	3.21	19	2	1_ShearNormalized	4	TRUE	heatmap	incorrect	FALSE
514	d4ecf5e4-653b-11e9-b700-44a84224eb5b	2	2	signals12St_FiberTapSt_MCE_1_ShearNormalized_26_window2.png	signals12St_FiberNomSt_DBE_1_ShearNormalized_26_window2.png	signals12St_FiberConstSt_MCE_1_ShearNormalized_26_window2.png	1.75	26	2	1_ShearNormalized	4	TRUE	heatmap	correct	TRUE
515	d4ecf5e4-653b-11e9-b700-44a84224eb5b	1	1	signals12St_BHinge_MCE_1_ShearNormalized_50_window1.png	signals12St_BHinge_Serv_1_ShearNormalized_50_window1.png	signals12St_FiberNomSt_MCE_1_ShearNormalized_50_window1.png	1.81	50	1	1_ShearNormalized	3	TRUE	heatmap	correct	TRUE
516	d4ecf5e4-653b-11e9-b700-44a84224eb5b	1	2	topics5_12St_BHinge_MCE_1_ShearNormalized_41_window2.png	topics5_12St_BHinge_MCE_1_ShearNormalized_41_window2.png	topics5_12St_FiberNomSt_MCE_1_ShearNormalized_41_window2.png	1.43	41	2	1_ShearNormalized	0	FALSE	topic	incorrect	FALSE
517	d4ecf5e4-653b-11e9-b700-44a84224eb5b	1	1	signals12St_FiberNomSt_Serv_1_ShearNormalized_42_window0.png	signals12St_FiberTapSt_Serv_1_ShearNormalized_42_window0.png	signals12St_FiberConstSt_MCE_1_ShearNormalized_42_window0.png	1.51	42	0	1_ShearNormalized	2	TRUE	heatmap	correct	TRUE
518	d4ecf5e4-653b-11e9-b700-44a84224eb5b	2	2	signals12St_FiberNomSt_MCE_1_ShearNormalized_19_window0.png	signals12St_FiberConstSt_DBE_1_ShearNormalized_19_window0.png	signals12St_FiberTapSt_MCE_1_ShearNormalized_19_window0.png	0.97	19	0	1_ShearNormalized	4	TRUE	heatmap	correct	TRUE
519	d4ecf5e4-653b-11e9-b700-44a84224eb5b	1	1	topics5_12St_FiberTapSt_MCE_1_ShearNormalized_19_window2.png	topics5_12St_FiberNomSt_MCE_1_ShearNormalized_19_window2.png	topics5_12St_FiberConstSt_DBE_1_ShearNormalized_19_window2.png	1.34	19	2	1_ShearNormalized	4	FALSE	topic	correct	TRUE
520	d4ecf5e4-653b-11e9-b700-44a84224eb5b	1	2	topics5_12St_FiberTapSt_MCE_1_ShearNormalized_26_window2.png	topics5_12St_FiberConstSt_MCE_1_ShearNormalized_26_window2.png	topics5_12St_FiberNomSt_DBE_1_ShearNormalized_26_window2.png	1.12	26	2	1_ShearNormalized	4	FALSE	topic	incorrect	FALSE
521	d4ecf5e4-653b-11e9-b700-44a84224eb5b	2	1	topics5_12St_FiberNomSt_Serv_1_ShearNormalized_01_window2.png	topics5_12St_FiberConstSt_MCE_1_ShearNormalized_01_window2.png	topics5_12St_FiberTapSt_Serv_1_ShearNormalized_01_window2.png	1.16	1	2	1_ShearNormalized	2	FALSE	topic	incorrect	FALSE
522	d4ecf5e4-653b-11e9-b700-44a84224eb5b	2	2	signals12St_BHinge_MCE_1_ShearNormalized_11_window1.png	signals12St_FiberConstSt_MCE_1_ShearNormalized_11_window1.png	signals12St_BHinge_DBE_1_ShearNormalized_11_window1.png	1.16	11	1	1_ShearNormalized	1	TRUE	heatmap	correct	TRUE
523	d4ecf5e4-653b-11e9-b700-44a84224eb5b	2	1	signals12St_BHinge_MCE_1_ShearNormalized_41_window2.png	signals12St_FiberNomSt_MCE_1_ShearNormalized_41_window2.png	signals12St_BHinge_MCE_1_ShearNormalized_41_window2.png	1.28	41	2	1_ShearNormalized	0	TRUE	heatmap	incorrect	FALSE
524	d4ecf5e4-653b-11e9-b700-44a84224eb5b	2	1	signals12St_BHinge_DBE_1_ShearNormalized_35_window2.png	signals12St_FiberConstSt_DBE_1_ShearNormalized_35_window2.png	signals12St_BHinge_MCE_1_ShearNormalized_35_window2.png	1.29	35	2	1_ShearNormalized	1	TRUE	heatmap	incorrect	FALSE
525	d4ecf5e4-653b-11e9-b700-44a84224eb5b	1	1	topics5_12St_BHinge_DBE_1_ShearNormalized_05_window1.png	topics5_12St_BHinge_MCE_1_ShearNormalized_05_window1.png	topics5_12St_FiberConstSt_DBE_1_ShearNormalized_05_window1.png	0.97	5	1	1_ShearNormalized	1	FALSE	topic	correct	TRUE
526	d4ecf5e4-653b-11e9-b700-44a84224eb5b	2	1	signals12St_BHinge_DBE_1_ShearNormalized_29_window1.png	signals12St_FiberTapSt_DBE_1_ShearNormalized_29_window1.png	signals12St_BHinge_DBE_1_ShearNormalized_29_window1.png	1.21	29	1	1_ShearNormalized	0	TRUE	heatmap	incorrect	FALSE
527	d4ecf5e4-653b-11e9-b700-44a84224eb5b	2	1	signals12St_FiberConstSt_MCE_1_ShearNormalized_48_window0.png	signals12St_FiberTapSt_DBE_1_ShearNormalized_48_window0.png	signals12St_FiberNomSt_MCE_1_ShearNormalized_48_window0.png	1.32	48	0	1_ShearNormalized	4	TRUE	heatmap	incorrect	FALSE
528	d4ecf5e4-653b-11e9-b700-44a84224eb5b	1	1	topics5_12St_FiberNomSt_MCE_1_ShearNormalized_04_window1.png	topics5_12St_FiberTapSt_MCE_1_ShearNormalized_04_window1.png	topics5_12St_FiberConstSt_DBE_1_ShearNormalized_04_window1.png	0.88	4	1	1_ShearNormalized	4	FALSE	topic	correct	TRUE
529	d4ecf5e4-653b-11e9-b700-44a84224eb5b	2	2	signals12St_FiberConstSt_MCE_1_ShearNormalized_11_window1.png	signals12St_FiberTapSt_DBE_1_ShearNormalized_11_window1.png	signals12St_FiberNomSt_MCE_1_ShearNormalized_11_window1.png	1.27	11	1	1_ShearNormalized	4	TRUE	heatmap	correct	TRUE
530	d4ecf5e4-653b-11e9-b700-44a84224eb5b	2	1	signals12St_FiberNomSt_MCE_1_ShearNormalized_17_window1.png	signals12St_FiberTapSt_DBE_1_ShearNormalized_17_window1.png	signals12St_FiberConstSt_MCE_1_ShearNormalized_17_window1.png	1.27	17	1	1_ShearNormalized	4	TRUE	heatmap	incorrect	FALSE
531	d4ecf5e4-653b-11e9-b700-44a84224eb5b	1	2	signals12St_BHinge_Serv_1_ShearNormalized_37_window1.png	signals12St_BHinge_DBE_1_ShearNormalized_37_window1.png	signals12St_FiberConstSt_Serv_1_ShearNormalized_37_window1.png	1.11	37	1	1_ShearNormalized	3	TRUE	heatmap	incorrect	FALSE
532	d4ecf5e4-653b-11e9-b700-44a84224eb5b	1	1	signals12St_FiberNomSt_Serv_1_ShearNormalized_01_window2.png	signals12St_FiberTapSt_Serv_1_ShearNormalized_01_window2.png	signals12St_FiberConstSt_MCE_1_ShearNormalized_01_window2.png	0.99	1	2	1_ShearNormalized	2	TRUE	heatmap	correct	TRUE
533	d4ecf5e4-653b-11e9-b700-44a84224eb5b	2	2	topics5_12St_FiberNomSt_Serv_1_ShearNormalized_42_window0.png	topics5_12St_FiberConstSt_MCE_1_ShearNormalized_42_window0.png	topics5_12St_FiberTapSt_Serv_1_ShearNormalized_42_window0.png	0.87	42	0	1_ShearNormalized	2	FALSE	topic	correct	TRUE
534	d4ecf5e4-653b-11e9-b700-44a84224eb5b	1	1	topics5_12St_FiberNomSt_MCE_1_ShearNormalized_19_window0.png	topics5_12St_FiberTapSt_MCE_1_ShearNormalized_19_window0.png	topics5_12St_FiberConstSt_DBE_1_ShearNormalized_19_window0.png	1.08	19	0	1_ShearNormalized	4	FALSE	topic	correct	TRUE
535	d4ecf5e4-653b-11e9-b700-44a84224eb5b	1	2	topics5_12St_BHinge_DBE_1_ShearNormalized_35_window2.png	topics5_12St_BHinge_MCE_1_ShearNormalized_35_window2.png	topics5_12St_FiberConstSt_DBE_1_ShearNormalized_35_window2.png	1.01	35	2	1_ShearNormalized	1	FALSE	topic	incorrect	FALSE
536	d4ecf5e4-653b-11e9-b700-44a84224eb5b	1	2	topics5_12St_BHinge_DBE_1_ShearNormalized_29_window1.png	topics5_12St_BHinge_DBE_1_ShearNormalized_29_window1.png	topics5_12St_FiberTapSt_DBE_1_ShearNormalized_29_window1.png	0.94	29	1	1_ShearNormalized	0	FALSE	topic	incorrect	FALSE
537	d4ecf5e4-653b-11e9-b700-44a84224eb5b	2	2	signals12St_BHinge_DBE_1_ShearNormalized_05_window1.png	signals12St_FiberConstSt_DBE_1_ShearNormalized_05_window1.png	signals12St_BHinge_MCE_1_ShearNormalized_05_window1.png	1.15	5	1	1_ShearNormalized	1	TRUE	heatmap	correct	TRUE
538	d4ecf5e4-653b-11e9-b700-44a84224eb5b	1	2	topics5_12St_FiberConstSt_MCE_1_ShearNormalized_48_window0.png	topics5_12St_FiberNomSt_MCE_1_ShearNormalized_48_window0.png	topics5_12St_FiberTapSt_DBE_1_ShearNormalized_48_window0.png	0.84	48	0	1_ShearNormalized	4	FALSE	topic	incorrect	FALSE
539	d4ecf5e4-653b-11e9-b700-44a84224eb5b	1	2	topics5_12St_FiberConstSt_MCE_1_ShearNormalized_11_window1.png	topics5_12St_FiberNomSt_MCE_1_ShearNormalized_11_window1.png	topics5_12St_FiberTapSt_DBE_1_ShearNormalized_11_window1.png	0.89	11	1	1_ShearNormalized	4	FALSE	topic	incorrect	FALSE
540	d4ecf5e4-653b-11e9-b700-44a84224eb5b	1	2	signals12St_BHinge_DBE_1_ShearNormalized_33_window0.png	signals12St_BHinge_Serv_1_ShearNormalized_33_window0.png	signals12St_FiberConstSt_DBE_1_ShearNormalized_33_window0.png	0.96	33	0	1_ShearNormalized	3	TRUE	heatmap	incorrect	FALSE
541	d4ecf5e4-653b-11e9-b700-44a84224eb5b	2	2	signals12St_FiberNomSt_MCE_1_ShearNormalized_04_window1.png	signals12St_FiberConstSt_DBE_1_ShearNormalized_04_window1.png	signals12St_FiberTapSt_MCE_1_ShearNormalized_04_window1.png	1.22	4	1	1_ShearNormalized	4	TRUE	heatmap	correct	TRUE
542	d4ecf5e4-653b-11e9-b700-44a84224eb5b	1	2	topics5_12St_BHinge_MCE_1_ShearNormalized_11_window1.png	topics5_12St_BHinge_DBE_1_ShearNormalized_11_window1.png	topics5_12St_FiberConstSt_MCE_1_ShearNormalized_11_window1.png	0.5	11	1	1_ShearNormalized	1	FALSE	topic	incorrect	FALSE
543	d4ecf5e4-653b-11e9-b700-44a84224eb5b	1	2	topics5_12St_FiberNomSt_MCE_1_ShearNormalized_17_window1.png	topics5_12St_FiberConstSt_MCE_1_ShearNormalized_17_window1.png	topics5_12St_FiberTapSt_DBE_1_ShearNormalized_17_window1.png	0.77	17	1	1_ShearNormalized	4	FALSE	topic	incorrect	FALSE
544	d4ecf5e4-653b-11e9-b700-44a84224eb5b	2	2	topics5_12St_BHinge_Serv_1_ShearNormalized_37_window1.png	topics5_12St_FiberConstSt_Serv_1_ShearNormalized_37_window1.png	topics5_12St_BHinge_DBE_1_ShearNormalized_37_window1.png	2.88	37	1	1_ShearNormalized	3	FALSE	topic	correct	TRUE
545	d4ecf5e4-653b-11e9-b700-44a84224eb5b	2	2	topics5_12St_BHinge_DBE_1_ShearNormalized_33_window0.png	topics5_12St_FiberConstSt_DBE_1_ShearNormalized_33_window0.png	topics5_12St_BHinge_Serv_1_ShearNormalized_33_window0.png	1.12	33	0	1_ShearNormalized	3	FALSE	topic	correct	TRUE
546	d4ecf5e4-653b-11e9-b700-44a84224eb5b	2	2	topics5_12St_BHinge_MCE_1_ShearNormalized_50_window1.png	topics5_12St_FiberNomSt_MCE_1_ShearNormalized_50_window1.png	topics5_12St_BHinge_Serv_1_ShearNormalized_50_window1.png	0.85	50	1	1_ShearNormalized	3	FALSE	topic	correct	TRUE
547	e24204e2-64e5-11e9-881e-44a84224eb5b	1	1	signals12St_FiberTapSt_Serv_1_ShearNormalized_22_window2.png	signals12St_FiberConstSt_Serv_1_ShearNormalized_22_window2.png	signals12St_FiberNomSt_DBE_1_ShearNormalized_22_window2.png	2.29	22	2	1_ShearNormalized	2	TRUE	heatmap	correct	TRUE
548	e24204e2-64e5-11e9-881e-44a84224eb5b	2	1	topics5_12St_BHinge_MCE_1_ShearNormalized_26_window1.png	topics5_12St_FiberTapSt_MCE_1_ShearNormalized_26_window1.png	topics5_12St_BHinge_Serv_1_ShearNormalized_26_window1.png	4.16	26	1	1_ShearNormalized	3	FALSE	topic	incorrect	FALSE
549	e24204e2-64e5-11e9-881e-44a84224eb5b	1	1	topics5_12St_FiberTapSt_MCE_1_ShearNormalized_44_window1.png	topics5_12St_FiberConstSt_MCE_1_ShearNormalized_44_window1.png	topics5_12St_FiberNomSt_DBE_1_ShearNormalized_44_window1.png	15.41	44	1	1_ShearNormalized	4	FALSE	topic	correct	TRUE
550	e24204e2-64e5-11e9-881e-44a84224eb5b	2	2	signals12St_BHinge_DBE_1_ShearNormalized_26_window2.png	signals12St_FiberConstSt_DBE_1_ShearNormalized_26_window2.png	signals12St_BHinge_MCE_1_ShearNormalized_26_window2.png	4.08	26	2	1_ShearNormalized	1	TRUE	heatmap	correct	TRUE
551	e24204e2-64e5-11e9-881e-44a84224eb5b	1	1	topics5_12St_BHinge_DBE_1_ShearNormalized_47_window0.png	topics5_12St_BHinge_DBE_1_ShearNormalized_47_window0.png	topics5_12St_FiberConstSt_DBE_1_ShearNormalized_47_window0.png	2.4	47	0	1_ShearNormalized	0	FALSE	topic	correct	TRUE
552	e24204e2-64e5-11e9-881e-44a84224eb5b	2	1	signals12St_BHinge_DBE_1_ShearNormalized_48_window1.png	signals12St_FiberNomSt_DBE_1_ShearNormalized_48_window1.png	signals12St_BHinge_MCE_1_ShearNormalized_48_window1.png	4.19	48	1	1_ShearNormalized	1	TRUE	heatmap	incorrect	FALSE
553	e24204e2-64e5-11e9-881e-44a84224eb5b	2	2	topics5_12St_FiberConstSt_Serv_1_ShearNormalized_15_window2.png	topics5_12St_FiberNomSt_DBE_1_ShearNormalized_15_window2.png	topics5_12St_FiberTapSt_Serv_1_ShearNormalized_15_window2.png	2.27	15	2	1_ShearNormalized	2	FALSE	topic	correct	TRUE
554	e24204e2-64e5-11e9-881e-44a84224eb5b	2	2	signals12St_BHinge_DBE_1_ShearNormalized_47_window0.png	signals12St_FiberConstSt_DBE_1_ShearNormalized_47_window0.png	signals12St_BHinge_DBE_1_ShearNormalized_47_window0.png	4.71	47	0	1_ShearNormalized	0	TRUE	heatmap	correct	TRUE
555	e24204e2-64e5-11e9-881e-44a84224eb5b	2	2	topics5_12St_FiberTapSt_Serv_1_ShearNormalized_28_window0.png	topics5_12St_FiberNomSt_MCE_1_ShearNormalized_28_window0.png	topics5_12St_FiberConstSt_Serv_1_ShearNormalized_28_window0.png	3.1	28	0	1_ShearNormalized	2	FALSE	topic	correct	TRUE
556	e24204e2-64e5-11e9-881e-44a84224eb5b	2	2	signals12St_FiberNomSt_MCE_1_ShearNormalized_13_window2.png	signals12St_FiberTapSt_DBE_1_ShearNormalized_13_window2.png	signals12St_FiberConstSt_MCE_1_ShearNormalized_13_window2.png	3.23	13	2	1_ShearNormalized	4	TRUE	heatmap	correct	TRUE
557	e24204e2-64e5-11e9-881e-44a84224eb5b	1	2	signals12St_BHinge_Serv_1_ShearNormalized_27_window0.png	signals12St_BHinge_DBE_1_ShearNormalized_27_window0.png	signals12St_FiberTapSt_Serv_1_ShearNormalized_27_window0.png	8.32	27	0	1_ShearNormalized	3	TRUE	heatmap	incorrect	FALSE
558	e24204e2-64e5-11e9-881e-44a84224eb5b	1	1	topics5_12St_BHinge_DBE_1_ShearNormalized_48_window1.png	topics5_12St_BHinge_MCE_1_ShearNormalized_48_window1.png	topics5_12St_FiberNomSt_DBE_1_ShearNormalized_48_window1.png	4.61	48	1	1_ShearNormalized	1	FALSE	topic	correct	TRUE
559	e24204e2-64e5-11e9-881e-44a84224eb5b	1	1	signals12St_FiberConstSt_Serv_1_ShearNormalized_48_window1.png	signals12St_FiberTapSt_Serv_1_ShearNormalized_48_window1.png	signals12St_FiberNomSt_MCE_1_ShearNormalized_48_window1.png	3.75	48	1	1_ShearNormalized	2	TRUE	heatmap	correct	TRUE
560	e24204e2-64e5-11e9-881e-44a84224eb5b	1	2	signals12St_BHinge_MCE_1_ShearNormalized_26_window1.png	signals12St_BHinge_Serv_1_ShearNormalized_26_window1.png	signals12St_FiberTapSt_MCE_1_ShearNormalized_26_window1.png	5.3	26	1	1_ShearNormalized	3	TRUE	heatmap	incorrect	FALSE
561	e24204e2-64e5-11e9-881e-44a84224eb5b	1	1	signals12St_FiberConstSt_Serv_1_ShearNormalized_20_window2.png	signals12St_FiberNomSt_Serv_1_ShearNormalized_20_window2.png	signals12St_FiberTapSt_MCE_1_ShearNormalized_20_window2.png	2.12	20	2	1_ShearNormalized	2	TRUE	heatmap	correct	TRUE
562	e24204e2-64e5-11e9-881e-44a84224eb5b	1	1	topics5_12St_FiberConstSt_MCE_1_ShearNormalized_02_window1.png	topics5_12St_FiberNomSt_MCE_1_ShearNormalized_02_window1.png	topics5_12St_FiberTapSt_DBE_1_ShearNormalized_02_window1.png	2.47	2	1	1_ShearNormalized	4	FALSE	topic	correct	TRUE
563	e24204e2-64e5-11e9-881e-44a84224eb5b	1	1	topics5_12St_FiberConstSt_MCE_1_ShearNormalized_28_window1.png	topics5_12St_FiberTapSt_MCE_1_ShearNormalized_28_window1.png	topics5_12St_FiberNomSt_DBE_1_ShearNormalized_28_window1.png	4.21	28	1	1_ShearNormalized	4	FALSE	topic	correct	TRUE
564	e24204e2-64e5-11e9-881e-44a84224eb5b	1	1	topics5_12St_BHinge_DBE_1_ShearNormalized_26_window2.png	topics5_12St_BHinge_MCE_1_ShearNormalized_26_window2.png	topics5_12St_FiberConstSt_DBE_1_ShearNormalized_26_window2.png	3.46	26	2	1_ShearNormalized	1	FALSE	topic	correct	TRUE
565	e24204e2-64e5-11e9-881e-44a84224eb5b	2	2	signals12St_FiberConstSt_MCE_1_ShearNormalized_28_window1.png	signals12St_FiberNomSt_DBE_1_ShearNormalized_28_window1.png	signals12St_FiberTapSt_MCE_1_ShearNormalized_28_window1.png	2.94	28	1	1_ShearNormalized	4	TRUE	heatmap	correct	TRUE
566	e24204e2-64e5-11e9-881e-44a84224eb5b	2	1	signals12St_BHinge_DBE_1_ShearNormalized_23_window0.png	signals12St_FiberConstSt_DBE_1_ShearNormalized_23_window0.png	signals12St_BHinge_MCE_1_ShearNormalized_23_window0.png	2.37	23	0	1_ShearNormalized	1	TRUE	heatmap	incorrect	FALSE
567	e24204e2-64e5-11e9-881e-44a84224eb5b	2	2	topics5_12St_BHinge_Serv_1_ShearNormalized_27_window0.png	topics5_12St_FiberTapSt_Serv_1_ShearNormalized_27_window0.png	topics5_12St_BHinge_DBE_1_ShearNormalized_27_window0.png	1.72	27	0	1_ShearNormalized	3	FALSE	topic	correct	TRUE
568	e24204e2-64e5-11e9-881e-44a84224eb5b	2	2	signals12St_BHinge_DBE_1_ShearNormalized_27_window2.png	signals12St_FiberNomSt_DBE_1_ShearNormalized_27_window2.png	signals12St_BHinge_MCE_1_ShearNormalized_27_window2.png	4.35	27	2	1_ShearNormalized	1	TRUE	heatmap	correct	TRUE
569	e24204e2-64e5-11e9-881e-44a84224eb5b	1	1	topics5_12St_BHinge_DBE_1_ShearNormalized_27_window2.png	topics5_12St_BHinge_MCE_1_ShearNormalized_27_window2.png	topics5_12St_FiberNomSt_DBE_1_ShearNormalized_27_window2.png	2.9	27	2	1_ShearNormalized	1	FALSE	topic	correct	TRUE
570	e24204e2-64e5-11e9-881e-44a84224eb5b	1	1	topics5_12St_FiberNomSt_MCE_1_ShearNormalized_13_window2.png	topics5_12St_FiberConstSt_MCE_1_ShearNormalized_13_window2.png	topics5_12St_FiberTapSt_DBE_1_ShearNormalized_13_window2.png	3.64	13	2	1_ShearNormalized	4	FALSE	topic	correct	TRUE
571	e24204e2-64e5-11e9-881e-44a84224eb5b	2	2	signals12St_FiberTapSt_MCE_1_ShearNormalized_44_window1.png	signals12St_FiberNomSt_DBE_1_ShearNormalized_44_window1.png	signals12St_FiberConstSt_MCE_1_ShearNormalized_44_window1.png	5.78	44	1	1_ShearNormalized	4	TRUE	heatmap	correct	TRUE
572	e24204e2-64e5-11e9-881e-44a84224eb5b	2	1	signals12St_BHinge_DBE_1_ShearNormalized_50_window1.png	signals12St_FiberConstSt_DBE_1_ShearNormalized_50_window1.png	signals12St_BHinge_DBE_1_ShearNormalized_50_window1.png	6.85	50	1	1_ShearNormalized	0	TRUE	heatmap	incorrect	FALSE
573	e24204e2-64e5-11e9-881e-44a84224eb5b	1	1	topics5_12St_BHinge_DBE_1_ShearNormalized_50_window1.png	topics5_12St_BHinge_DBE_1_ShearNormalized_50_window1.png	topics5_12St_FiberConstSt_DBE_1_ShearNormalized_50_window1.png	1.97	50	1	1_ShearNormalized	0	FALSE	topic	correct	TRUE
574	e24204e2-64e5-11e9-881e-44a84224eb5b	2	2	topics5_12St_FiberConstSt_Serv_1_ShearNormalized_20_window2.png	topics5_12St_FiberTapSt_MCE_1_ShearNormalized_20_window2.png	topics5_12St_FiberNomSt_Serv_1_ShearNormalized_20_window2.png	1.63	20	2	1_ShearNormalized	2	FALSE	topic	correct	TRUE
575	e24204e2-64e5-11e9-881e-44a84224eb5b	2	2	topics5_12St_FiberConstSt_Serv_1_ShearNormalized_48_window1.png	topics5_12St_FiberNomSt_MCE_1_ShearNormalized_48_window1.png	topics5_12St_FiberTapSt_Serv_1_ShearNormalized_48_window1.png	1.86	48	1	1_ShearNormalized	2	FALSE	topic	correct	TRUE
576	e24204e2-64e5-11e9-881e-44a84224eb5b	2	2	topics5_12St_FiberTapSt_Serv_1_ShearNormalized_22_window2.png	topics5_12St_FiberNomSt_DBE_1_ShearNormalized_22_window2.png	topics5_12St_FiberConstSt_Serv_1_ShearNormalized_22_window2.png	3.92	22	2	1_ShearNormalized	2	FALSE	topic	correct	TRUE
577	e24204e2-64e5-11e9-881e-44a84224eb5b	1	1	signals12St_FiberConstSt_Serv_1_ShearNormalized_15_window2.png	signals12St_FiberTapSt_Serv_1_ShearNormalized_15_window2.png	signals12St_FiberNomSt_DBE_1_ShearNormalized_15_window2.png	5.1	15	2	1_ShearNormalized	2	TRUE	heatmap	correct	TRUE
578	e24204e2-64e5-11e9-881e-44a84224eb5b	1	1	topics5_12St_BHinge_DBE_1_ShearNormalized_23_window0.png	topics5_12St_BHinge_MCE_1_ShearNormalized_23_window0.png	topics5_12St_FiberConstSt_DBE_1_ShearNormalized_23_window0.png	2.81	23	0	1_ShearNormalized	1	FALSE	topic	correct	TRUE
579	e24204e2-64e5-11e9-881e-44a84224eb5b	2	2	signals12St_FiberConstSt_MCE_1_ShearNormalized_02_window1.png	signals12St_FiberTapSt_DBE_1_ShearNormalized_02_window1.png	signals12St_FiberNomSt_MCE_1_ShearNormalized_02_window1.png	5.95	2	1	1_ShearNormalized	4	TRUE	heatmap	correct	TRUE
580	e24204e2-64e5-11e9-881e-44a84224eb5b	1	1	signals12St_FiberTapSt_Serv_1_ShearNormalized_28_window0.png	signals12St_FiberConstSt_Serv_1_ShearNormalized_28_window0.png	signals12St_FiberNomSt_MCE_1_ShearNormalized_28_window0.png	2.59	28	0	1_ShearNormalized	2	TRUE	heatmap	correct	TRUE
581	e6e3a474-6226-11e9-80d5-784f43628f47	1	1	topics5_12St_BHinge_MCE_1_ShearNormalized_06_window1.png	topics5_12St_BHinge_MCE_1_ShearNormalized_06_window1.png	topics5_12St_FiberTapSt_MCE_1_ShearNormalized_06_window1.png	1.77	6	1	1_ShearNormalized	0	FALSE	topic	correct	TRUE
582	e6e3a474-6226-11e9-80d5-784f43628f47	1	1	topics5_12St_BHinge_MCE_1_ShearNormalized_20_window2.png	topics5_12St_BHinge_DBE_1_ShearNormalized_20_window2.png	topics5_12St_FiberNomSt_MCE_1_ShearNormalized_20_window2.png	1.45	20	2	1_ShearNormalized	1	FALSE	topic	correct	TRUE
583	e6e3a474-6226-11e9-80d5-784f43628f47	1	1	signals12St_FiberNomSt_Serv_1_ShearNormalized_11_window2.png	signals12St_FiberTapSt_Serv_1_ShearNormalized_11_window2.png	signals12St_FiberConstSt_DBE_1_ShearNormalized_11_window2.png	2.3	11	2	1_ShearNormalized	2	TRUE	heatmap	correct	TRUE
584	e6e3a474-6226-11e9-80d5-784f43628f47	2	2	signals12St_BHinge_DBE_1_ShearNormalized_08_window0.png	signals12St_FiberTapSt_DBE_1_ShearNormalized_08_window0.png	signals12St_BHinge_MCE_1_ShearNormalized_08_window0.png	3.75	8	0	1_ShearNormalized	1	TRUE	heatmap	correct	TRUE
585	e6e3a474-6226-11e9-80d5-784f43628f47	2	1	signals12St_BHinge_MCE_1_ShearNormalized_20_window2.png	signals12St_FiberNomSt_MCE_1_ShearNormalized_20_window2.png	signals12St_BHinge_DBE_1_ShearNormalized_20_window2.png	6.88	20	2	1_ShearNormalized	1	TRUE	heatmap	incorrect	FALSE
586	e6e3a474-6226-11e9-80d5-784f43628f47	2	2	signals12St_BHinge_MCE_1_ShearNormalized_37_window0.png	signals12St_FiberConstSt_MCE_1_ShearNormalized_37_window0.png	signals12St_BHinge_MCE_1_ShearNormalized_37_window0.png	2.87	37	0	1_ShearNormalized	0	TRUE	heatmap	correct	TRUE
587	e6e3a474-6226-11e9-80d5-784f43628f47	1	1	topics5_12St_BHinge_MCE_1_ShearNormalized_37_window0.png	topics5_12St_BHinge_MCE_1_ShearNormalized_37_window0.png	topics5_12St_FiberConstSt_MCE_1_ShearNormalized_37_window0.png	1.61	37	0	1_ShearNormalized	0	FALSE	topic	correct	TRUE
588	e6e3a474-6226-11e9-80d5-784f43628f47	2	2	signals12St_FiberConstSt_MCE_1_ShearNormalized_27_window0.png	signals12St_FiberNomSt_DBE_1_ShearNormalized_27_window0.png	signals12St_FiberTapSt_MCE_1_ShearNormalized_27_window0.png	4.87	27	0	1_ShearNormalized	4	TRUE	heatmap	correct	TRUE
589	e6e3a474-6226-11e9-80d5-784f43628f47	1	1	signals12St_BHinge_Serv_1_ShearNormalized_22_window0.png	signals12St_BHinge_DBE_1_ShearNormalized_22_window0.png	signals12St_FiberNomSt_Serv_1_ShearNormalized_22_window0.png	1.83	22	0	1_ShearNormalized	3	TRUE	heatmap	correct	TRUE
590	e6e3a474-6226-11e9-80d5-784f43628f47	2	1	signals12St_BHinge_MCE_1_ShearNormalized_25_window1.png	signals12St_FiberNomSt_MCE_1_ShearNormalized_25_window1.png	signals12St_BHinge_DBE_1_ShearNormalized_25_window1.png	8.16	25	1	1_ShearNormalized	1	TRUE	heatmap	incorrect	FALSE
591	e6e3a474-6226-11e9-80d5-784f43628f47	1	1	topics5_12St_FiberTapSt_MCE_1_ShearNormalized_06_window0.png	topics5_12St_FiberNomSt_MCE_1_ShearNormalized_06_window0.png	topics5_12St_FiberConstSt_DBE_1_ShearNormalized_06_window0.png	4.24	6	0	1_ShearNormalized	4	FALSE	topic	correct	TRUE
592	e6e3a474-6226-11e9-80d5-784f43628f47	2	2	signals12St_FiberTapSt_MCE_1_ShearNormalized_47_window1.png	signals12St_FiberConstSt_DBE_1_ShearNormalized_47_window1.png	signals12St_FiberNomSt_MCE_1_ShearNormalized_47_window1.png	6.59	47	1	1_ShearNormalized	4	TRUE	heatmap	correct	TRUE
593	e6e3a474-6226-11e9-80d5-784f43628f47	2	2	signals12St_BHinge_MCE_1_ShearNormalized_06_window1.png	signals12St_FiberTapSt_MCE_1_ShearNormalized_06_window1.png	signals12St_BHinge_MCE_1_ShearNormalized_06_window1.png	2.34	6	1	1_ShearNormalized	0	TRUE	heatmap	correct	TRUE
594	e6e3a474-6226-11e9-80d5-784f43628f47	1	1	topics5_12St_FiberConstSt_MCE_1_ShearNormalized_27_window0.png	topics5_12St_FiberTapSt_MCE_1_ShearNormalized_27_window0.png	topics5_12St_FiberNomSt_DBE_1_ShearNormalized_27_window0.png	9.58	27	0	1_ShearNormalized	4	FALSE	topic	correct	TRUE
595	e6e3a474-6226-11e9-80d5-784f43628f47	2	2	signals12St_FiberConstSt_MCE_1_ShearNormalized_48_window2.png	signals12St_FiberTapSt_DBE_1_ShearNormalized_48_window2.png	signals12St_FiberNomSt_MCE_1_ShearNormalized_48_window2.png	3.59	48	2	1_ShearNormalized	4	TRUE	heatmap	correct	TRUE
596	e6e3a474-6226-11e9-80d5-784f43628f47	1	2	signals12St_BHinge_MCE_1_ShearNormalized_10_window1.png	signals12St_BHinge_Serv_1_ShearNormalized_10_window1.png	signals12St_FiberNomSt_MCE_1_ShearNormalized_10_window1.png	4.19	10	1	1_ShearNormalized	3	TRUE	heatmap	incorrect	FALSE
597	e6e3a474-6226-11e9-80d5-784f43628f47	1	1	topics5_12St_BHinge_DBE_1_ShearNormalized_08_window0.png	topics5_12St_BHinge_MCE_1_ShearNormalized_08_window0.png	topics5_12St_FiberTapSt_DBE_1_ShearNormalized_08_window0.png	4.09	8	0	1_ShearNormalized	1	FALSE	topic	correct	TRUE
598	e6e3a474-6226-11e9-80d5-784f43628f47	2	2	signals12St_FiberNomSt_MCE_1_ShearNormalized_49_window0.png	signals12St_FiberConstSt_DBE_1_ShearNormalized_49_window0.png	signals12St_FiberTapSt_MCE_1_ShearNormalized_49_window0.png	2.55	49	0	1_ShearNormalized	4	TRUE	heatmap	correct	TRUE
599	e6e3a474-6226-11e9-80d5-784f43628f47	2	1	signals12St_FiberTapSt_MCE_1_ShearNormalized_06_window0.png	signals12St_FiberConstSt_DBE_1_ShearNormalized_06_window0.png	signals12St_FiberNomSt_MCE_1_ShearNormalized_06_window0.png	3.16	6	0	1_ShearNormalized	4	TRUE	heatmap	incorrect	FALSE
600	e6e3a474-6226-11e9-80d5-784f43628f47	2	1	topics5_12St_BHinge_MCE_1_ShearNormalized_24_window1.png	topics5_12St_FiberTapSt_MCE_1_ShearNormalized_24_window1.png	topics5_12St_BHinge_Serv_1_ShearNormalized_24_window1.png	2	24	1	1_ShearNormalized	3	FALSE	topic	incorrect	FALSE
601	e6e3a474-6226-11e9-80d5-784f43628f47	1	1	topics5_12St_FiberTapSt_MCE_1_ShearNormalized_47_window1.png	topics5_12St_FiberNomSt_MCE_1_ShearNormalized_47_window1.png	topics5_12St_FiberConstSt_DBE_1_ShearNormalized_47_window1.png	3.24	47	1	1_ShearNormalized	4	FALSE	topic	correct	TRUE
602	e6e3a474-6226-11e9-80d5-784f43628f47	2	2	topics5_12St_FiberConstSt_Serv_1_ShearNormalized_50_window0.png	topics5_12St_FiberNomSt_DBE_1_ShearNormalized_50_window0.png	topics5_12St_FiberTapSt_Serv_1_ShearNormalized_50_window0.png	5.6	50	0	1_ShearNormalized	2	FALSE	topic	correct	TRUE
603	e6e3a474-6226-11e9-80d5-784f43628f47	2	2	topics5_12St_FiberNomSt_Serv_1_ShearNormalized_11_window2.png	topics5_12St_FiberConstSt_DBE_1_ShearNormalized_11_window2.png	topics5_12St_FiberTapSt_Serv_1_ShearNormalized_11_window2.png	1.4	11	2	1_ShearNormalized	2	FALSE	topic	correct	TRUE
604	e6e3a474-6226-11e9-80d5-784f43628f47	2	1	signals12St_FiberTapSt_MCE_1_ShearNormalized_24_window0.png	signals12St_FiberConstSt_DBE_1_ShearNormalized_24_window0.png	signals12St_FiberNomSt_MCE_1_ShearNormalized_24_window0.png	4.63	24	0	1_ShearNormalized	4	TRUE	heatmap	incorrect	FALSE
605	e6e3a474-6226-11e9-80d5-784f43628f47	1	1	signals12St_FiberConstSt_Serv_1_ShearNormalized_50_window0.png	signals12St_FiberTapSt_Serv_1_ShearNormalized_50_window0.png	signals12St_FiberNomSt_DBE_1_ShearNormalized_50_window0.png	3.34	50	0	1_ShearNormalized	2	TRUE	heatmap	correct	TRUE
606	e6e3a474-6226-11e9-80d5-784f43628f47	1	1	signals12St_FiberNomSt_Serv_1_ShearNormalized_45_window1.png	signals12St_FiberConstSt_Serv_1_ShearNormalized_45_window1.png	signals12St_FiberTapSt_DBE_1_ShearNormalized_45_window1.png	3.95	45	1	1_ShearNormalized	2	TRUE	heatmap	correct	TRUE
607	e6e3a474-6226-11e9-80d5-784f43628f47	1	1	topics5_12St_BHinge_MCE_1_ShearNormalized_25_window1.png	topics5_12St_BHinge_DBE_1_ShearNormalized_25_window1.png	topics5_12St_FiberNomSt_MCE_1_ShearNormalized_25_window1.png	1.25	25	1	1_ShearNormalized	1	FALSE	topic	correct	TRUE
608	e6e3a474-6226-11e9-80d5-784f43628f47	1	2	signals12St_BHinge_MCE_1_ShearNormalized_24_window1.png	signals12St_BHinge_Serv_1_ShearNormalized_24_window1.png	signals12St_FiberTapSt_MCE_1_ShearNormalized_24_window1.png	3.76	24	1	1_ShearNormalized	3	TRUE	heatmap	incorrect	FALSE
609	e6e3a474-6226-11e9-80d5-784f43628f47	2	1	topics5_12St_BHinge_MCE_1_ShearNormalized_10_window1.png	topics5_12St_FiberNomSt_MCE_1_ShearNormalized_10_window1.png	topics5_12St_BHinge_Serv_1_ShearNormalized_10_window1.png	1.74	10	1	1_ShearNormalized	3	FALSE	topic	incorrect	FALSE
610	e6e3a474-6226-11e9-80d5-784f43628f47	1	1	topics5_12St_FiberNomSt_MCE_1_ShearNormalized_49_window0.png	topics5_12St_FiberTapSt_MCE_1_ShearNormalized_49_window0.png	topics5_12St_FiberConstSt_DBE_1_ShearNormalized_49_window0.png	3.15	49	0	1_ShearNormalized	4	FALSE	topic	correct	TRUE
611	e6e3a474-6226-11e9-80d5-784f43628f47	1	1	topics5_12St_FiberTapSt_MCE_1_ShearNormalized_24_window0.png	topics5_12St_FiberNomSt_MCE_1_ShearNormalized_24_window0.png	topics5_12St_FiberConstSt_DBE_1_ShearNormalized_24_window0.png	2.41	24	0	1_ShearNormalized	4	FALSE	topic	correct	TRUE
612	e6e3a474-6226-11e9-80d5-784f43628f47	2	2	topics5_12St_FiberNomSt_Serv_1_ShearNormalized_45_window1.png	topics5_12St_FiberTapSt_DBE_1_ShearNormalized_45_window1.png	topics5_12St_FiberConstSt_Serv_1_ShearNormalized_45_window1.png	2.53	45	1	1_ShearNormalized	2	FALSE	topic	correct	TRUE
613	e6e3a474-6226-11e9-80d5-784f43628f47	2	2	topics5_12St_BHinge_Serv_1_ShearNormalized_22_window0.png	topics5_12St_FiberNomSt_Serv_1_ShearNormalized_22_window0.png	topics5_12St_BHinge_DBE_1_ShearNormalized_22_window0.png	2.13	22	0	1_ShearNormalized	3	FALSE	topic	correct	TRUE
614	e6e3a474-6226-11e9-80d5-784f43628f47	1	1	topics5_12St_FiberConstSt_MCE_1_ShearNormalized_48_window2.png	topics5_12St_FiberNomSt_MCE_1_ShearNormalized_48_window2.png	topics5_12St_FiberTapSt_DBE_1_ShearNormalized_48_window2.png	1.72	48	2	1_ShearNormalized	4	FALSE	topic	correct	TRUE
615	ef3a4b78-6521-11e9-9806-44a84224eb5b	2	2	signals12St_FiberNomSt_MCE_1_ShearNormalized_40_window1.png	signals12St_FiberConstSt_DBE_1_ShearNormalized_40_window1.png	signals12St_FiberTapSt_MCE_1_ShearNormalized_40_window1.png	7.95	40	1	1_ShearNormalized	4	TRUE	heatmap	correct	TRUE
616	ef3a4b78-6521-11e9-9806-44a84224eb5b	2	2	signals12St_BHinge_MCE_1_ShearNormalized_42_window0.png	signals12St_FiberTapSt_MCE_1_ShearNormalized_42_window0.png	signals12St_BHinge_MCE_1_ShearNormalized_42_window0.png	10.18	42	0	1_ShearNormalized	0	TRUE	heatmap	correct	TRUE
617	ef3a4b78-6521-11e9-9806-44a84224eb5b	1	1	topics5_12St_BHinge_MCE_1_ShearNormalized_14_window2.png	topics5_12St_BHinge_MCE_1_ShearNormalized_14_window2.png	topics5_12St_FiberConstSt_MCE_1_ShearNormalized_14_window2.png	5.38	14	2	1_ShearNormalized	0	FALSE	topic	correct	TRUE
618	ef3a4b78-6521-11e9-9806-44a84224eb5b	1	1	signals12St_FiberNomSt_Serv_1_ShearNormalized_34_window1.png	signals12St_FiberTapSt_Serv_1_ShearNormalized_34_window1.png	signals12St_FiberConstSt_DBE_1_ShearNormalized_34_window1.png	4.4	34	1	1_ShearNormalized	2	TRUE	heatmap	correct	TRUE
619	ef3a4b78-6521-11e9-9806-44a84224eb5b	2	2	topics5_12St_FiberTapSt_Serv_1_ShearNormalized_43_window0.png	topics5_12St_FiberNomSt_DBE_1_ShearNormalized_43_window0.png	topics5_12St_FiberConstSt_Serv_1_ShearNormalized_43_window0.png	5.32	43	0	1_ShearNormalized	2	FALSE	topic	correct	TRUE
620	ef3a4b78-6521-11e9-9806-44a84224eb5b	2	1	signals12St_FiberNomSt_MCE_1_ShearNormalized_45_window1.png	signals12St_FiberConstSt_DBE_1_ShearNormalized_45_window1.png	signals12St_FiberTapSt_MCE_1_ShearNormalized_45_window1.png	8.39	45	1	1_ShearNormalized	4	TRUE	heatmap	incorrect	FALSE
621	ef3a4b78-6521-11e9-9806-44a84224eb5b	1	1	topics5_12St_BHinge_DBE_1_ShearNormalized_03_window0.png	topics5_12St_BHinge_MCE_1_ShearNormalized_03_window0.png	topics5_12St_FiberConstSt_DBE_1_ShearNormalized_03_window0.png	8.22	3	0	1_ShearNormalized	1	FALSE	topic	correct	TRUE
622	ef3a4b78-6521-11e9-9806-44a84224eb5b	1	1	topics5_12St_BHinge_MCE_1_ShearNormalized_42_window0.png	topics5_12St_BHinge_MCE_1_ShearNormalized_42_window0.png	topics5_12St_FiberTapSt_MCE_1_ShearNormalized_42_window0.png	8.33	42	0	1_ShearNormalized	0	FALSE	topic	correct	TRUE
623	ef3a4b78-6521-11e9-9806-44a84224eb5b	1	2	signals12St_BHinge_DBE_1_ShearNormalized_16_window0.png	signals12St_BHinge_Serv_1_ShearNormalized_16_window0.png	signals12St_FiberTapSt_DBE_1_ShearNormalized_16_window0.png	12.46	16	0	1_ShearNormalized	3	TRUE	heatmap	incorrect	FALSE
624	ef3a4b78-6521-11e9-9806-44a84224eb5b	2	1	topics5_12St_BHinge_MCE_1_ShearNormalized_17_window1.png	topics5_12St_FiberNomSt_MCE_1_ShearNormalized_17_window1.png	topics5_12St_BHinge_Serv_1_ShearNormalized_17_window1.png	13.43	17	1	1_ShearNormalized	3	FALSE	topic	incorrect	FALSE
625	ef3a4b78-6521-11e9-9806-44a84224eb5b	2	2	topics5_12St_FiberConstSt_Serv_1_ShearNormalized_35_window1.png	topics5_12St_FiberNomSt_MCE_1_ShearNormalized_35_window1.png	topics5_12St_FiberTapSt_Serv_1_ShearNormalized_35_window1.png	12.2	35	1	1_ShearNormalized	2	FALSE	topic	correct	TRUE
626	ef3a4b78-6521-11e9-9806-44a84224eb5b	2	2	topics5_12St_FiberNomSt_Serv_1_ShearNormalized_34_window1.png	topics5_12St_FiberConstSt_DBE_1_ShearNormalized_34_window1.png	topics5_12St_FiberTapSt_Serv_1_ShearNormalized_34_window1.png	3.22	34	1	1_ShearNormalized	2	FALSE	topic	correct	TRUE
627	ef3a4b78-6521-11e9-9806-44a84224eb5b	1	2	topics5_12St_FiberNomSt_MCE_1_ShearNormalized_45_window1.png	topics5_12St_FiberTapSt_MCE_1_ShearNormalized_45_window1.png	topics5_12St_FiberConstSt_DBE_1_ShearNormalized_45_window1.png	13.73	45	1	1_ShearNormalized	4	FALSE	topic	incorrect	FALSE
628	ef3a4b78-6521-11e9-9806-44a84224eb5b	2	2	topics5_12St_FiberConstSt_Serv_1_ShearNormalized_36_window2.png	topics5_12St_FiberNomSt_MCE_1_ShearNormalized_36_window2.png	topics5_12St_FiberTapSt_Serv_1_ShearNormalized_36_window2.png	3.28	36	2	1_ShearNormalized	2	FALSE	topic	correct	TRUE
629	ef3a4b78-6521-11e9-9806-44a84224eb5b	2	1	signals12St_BHinge_DBE_1_ShearNormalized_22_window2.png	signals12St_FiberTapSt_DBE_1_ShearNormalized_22_window2.png	signals12St_BHinge_MCE_1_ShearNormalized_22_window2.png	15.61	22	2	1_ShearNormalized	1	TRUE	heatmap	incorrect	FALSE
630	ef3a4b78-6521-11e9-9806-44a84224eb5b	1	1	topics5_12St_BHinge_DBE_1_ShearNormalized_22_window2.png	topics5_12St_BHinge_MCE_1_ShearNormalized_22_window2.png	topics5_12St_FiberTapSt_DBE_1_ShearNormalized_22_window2.png	6.7	22	2	1_ShearNormalized	1	FALSE	topic	correct	TRUE
631	ef3a4b78-6521-11e9-9806-44a84224eb5b	1	1	topics5_12St_FiberConstSt_MCE_1_ShearNormalized_37_window0.png	topics5_12St_FiberNomSt_MCE_1_ShearNormalized_37_window0.png	topics5_12St_FiberTapSt_DBE_1_ShearNormalized_37_window0.png	8.55	37	0	1_ShearNormalized	4	FALSE	topic	correct	TRUE
632	ef3a4b78-6521-11e9-9806-44a84224eb5b	2	2	signals12St_BHinge_DBE_1_ShearNormalized_29_window1.png	signals12St_FiberTapSt_DBE_1_ShearNormalized_29_window1.png	signals12St_BHinge_MCE_1_ShearNormalized_29_window1.png	7.53	29	1	1_ShearNormalized	1	TRUE	heatmap	correct	TRUE
633	ef3a4b78-6521-11e9-9806-44a84224eb5b	1	1	signals12St_FiberConstSt_Serv_1_ShearNormalized_36_window2.png	signals12St_FiberTapSt_Serv_1_ShearNormalized_36_window2.png	signals12St_FiberNomSt_MCE_1_ShearNormalized_36_window2.png	2.99	36	2	1_ShearNormalized	2	TRUE	heatmap	correct	TRUE
634	ef3a4b78-6521-11e9-9806-44a84224eb5b	2	2	signals12St_FiberConstSt_MCE_1_ShearNormalized_37_window0.png	signals12St_FiberTapSt_DBE_1_ShearNormalized_37_window0.png	signals12St_FiberNomSt_MCE_1_ShearNormalized_37_window0.png	6.79	37	0	1_ShearNormalized	4	TRUE	heatmap	correct	TRUE
635	ef3a4b78-6521-11e9-9806-44a84224eb5b	1	2	topics5_12St_FiberNomSt_MCE_1_ShearNormalized_40_window1.png	topics5_12St_FiberTapSt_MCE_1_ShearNormalized_40_window1.png	topics5_12St_FiberConstSt_DBE_1_ShearNormalized_40_window1.png	9.91	40	1	1_ShearNormalized	4	FALSE	topic	incorrect	FALSE
636	ef3a4b78-6521-11e9-9806-44a84224eb5b	2	1	topics5_12St_BHinge_DBE_1_ShearNormalized_16_window0.png	topics5_12St_FiberTapSt_DBE_1_ShearNormalized_16_window0.png	topics5_12St_BHinge_Serv_1_ShearNormalized_16_window0.png	13.37	16	0	1_ShearNormalized	3	FALSE	topic	incorrect	FALSE
637	ef3a4b78-6521-11e9-9806-44a84224eb5b	1	1	signals12St_FiberConstSt_Serv_1_ShearNormalized_35_window1.png	signals12St_FiberTapSt_Serv_1_ShearNormalized_35_window1.png	signals12St_FiberNomSt_MCE_1_ShearNormalized_35_window1.png	4.52	35	1	1_ShearNormalized	2	TRUE	heatmap	correct	TRUE
638	ef3a4b78-6521-11e9-9806-44a84224eb5b	1	1	topics5_12St_BHinge_DBE_1_ShearNormalized_29_window1.png	topics5_12St_BHinge_MCE_1_ShearNormalized_29_window1.png	topics5_12St_FiberTapSt_DBE_1_ShearNormalized_29_window1.png	8.18	29	1	1_ShearNormalized	1	FALSE	topic	correct	TRUE
639	ef3a4b78-6521-11e9-9806-44a84224eb5b	1	1	topics5_12St_BHinge_DBE_1_ShearNormalized_39_window0.png	topics5_12St_BHinge_MCE_1_ShearNormalized_39_window0.png	topics5_12St_FiberNomSt_DBE_1_ShearNormalized_39_window0.png	7.73	39	0	1_ShearNormalized	1	FALSE	topic	correct	TRUE
640	ef3a4b78-6521-11e9-9806-44a84224eb5b	1	1	signals12St_FiberNomSt_Serv_1_ShearNormalized_34_window0.png	signals12St_FiberConstSt_Serv_1_ShearNormalized_34_window0.png	signals12St_FiberTapSt_MCE_1_ShearNormalized_34_window0.png	3.75	34	0	1_ShearNormalized	2	TRUE	heatmap	correct	TRUE
641	ef3a4b78-6521-11e9-9806-44a84224eb5b	2	2	topics5_12St_FiberNomSt_Serv_1_ShearNormalized_34_window0.png	topics5_12St_FiberTapSt_MCE_1_ShearNormalized_34_window0.png	topics5_12St_FiberConstSt_Serv_1_ShearNormalized_34_window0.png	6.31	34	0	1_ShearNormalized	2	FALSE	topic	correct	TRUE
642	ef3a4b78-6521-11e9-9806-44a84224eb5b	2	2	signals12St_BHinge_MCE_1_ShearNormalized_14_window2.png	signals12St_FiberConstSt_MCE_1_ShearNormalized_14_window2.png	signals12St_BHinge_MCE_1_ShearNormalized_14_window2.png	5.12	14	2	1_ShearNormalized	0	TRUE	heatmap	correct	TRUE
643	ef3a4b78-6521-11e9-9806-44a84224eb5b	2	2	topics5_12St_FiberNomSt_Serv_1_ShearNormalized_18_window1.png	topics5_12St_FiberConstSt_DBE_1_ShearNormalized_18_window1.png	topics5_12St_FiberTapSt_Serv_1_ShearNormalized_18_window1.png	3.5	18	1	1_ShearNormalized	2	FALSE	topic	correct	TRUE
644	ef3a4b78-6521-11e9-9806-44a84224eb5b	1	1	signals12St_FiberTapSt_Serv_1_ShearNormalized_43_window0.png	signals12St_FiberConstSt_Serv_1_ShearNormalized_43_window0.png	signals12St_FiberNomSt_DBE_1_ShearNormalized_43_window0.png	6.7	43	0	1_ShearNormalized	2	TRUE	heatmap	correct	TRUE
645	ef3a4b78-6521-11e9-9806-44a84224eb5b	2	2	signals12St_BHinge_DBE_1_ShearNormalized_03_window0.png	signals12St_FiberConstSt_DBE_1_ShearNormalized_03_window0.png	signals12St_BHinge_MCE_1_ShearNormalized_03_window0.png	6.08	3	0	1_ShearNormalized	1	TRUE	heatmap	correct	TRUE
646	ef3a4b78-6521-11e9-9806-44a84224eb5b	1	2	signals12St_BHinge_MCE_1_ShearNormalized_17_window1.png	signals12St_BHinge_Serv_1_ShearNormalized_17_window1.png	signals12St_FiberNomSt_MCE_1_ShearNormalized_17_window1.png	3.52	17	1	1_ShearNormalized	3	TRUE	heatmap	incorrect	FALSE
647	ef3a4b78-6521-11e9-9806-44a84224eb5b	1	1	signals12St_FiberNomSt_Serv_1_ShearNormalized_18_window1.png	signals12St_FiberTapSt_Serv_1_ShearNormalized_18_window1.png	signals12St_FiberConstSt_DBE_1_ShearNormalized_18_window1.png	4.81	18	1	1_ShearNormalized	2	TRUE	heatmap	correct	TRUE
648	ef3a4b78-6521-11e9-9806-44a84224eb5b	2	2	signals12St_BHinge_DBE_1_ShearNormalized_39_window0.png	signals12St_FiberNomSt_DBE_1_ShearNormalized_39_window0.png	signals12St_BHinge_MCE_1_ShearNormalized_39_window0.png	5.87	39	0	1_ShearNormalized	1	TRUE	heatmap	correct	TRUE
649	f25374fe-651e-11e9-bb5a-44a84224eb5b	1	1	topics5_12St_FiberConstSt_MCE_1_ShearNormalized_12_window0.png	topics5_12St_FiberTapSt_MCE_1_ShearNormalized_12_window0.png	topics5_12St_FiberNomSt_DBE_1_ShearNormalized_12_window0.png	4.78	12	0	1_ShearNormalized	4	FALSE	topic	correct	TRUE
650	f25374fe-651e-11e9-bb5a-44a84224eb5b	1	1	signals12St_FiberTapSt_Serv_1_ShearNormalized_06_window2.png	signals12St_FiberNomSt_Serv_1_ShearNormalized_06_window2.png	signals12St_FiberConstSt_MCE_1_ShearNormalized_06_window2.png	2.77	6	2	1_ShearNormalized	2	TRUE	heatmap	correct	TRUE
651	f25374fe-651e-11e9-bb5a-44a84224eb5b	2	2	topics5_12St_BHinge_Serv_1_ShearNormalized_04_window0.png	topics5_12St_FiberConstSt_Serv_1_ShearNormalized_04_window0.png	topics5_12St_BHinge_MCE_1_ShearNormalized_04_window0.png	3.72	4	0	1_ShearNormalized	3	FALSE	topic	correct	TRUE
652	f25374fe-651e-11e9-bb5a-44a84224eb5b	2	2	signals12St_FiberConstSt_MCE_1_ShearNormalized_37_window2.png	signals12St_FiberNomSt_DBE_1_ShearNormalized_37_window2.png	signals12St_FiberTapSt_MCE_1_ShearNormalized_37_window2.png	5.85	37	2	1_ShearNormalized	4	TRUE	heatmap	correct	TRUE
653	f25374fe-651e-11e9-bb5a-44a84224eb5b	2	2	topics5_12St_FiberTapSt_Serv_1_ShearNormalized_06_window2.png	topics5_12St_FiberConstSt_MCE_1_ShearNormalized_06_window2.png	topics5_12St_FiberNomSt_Serv_1_ShearNormalized_06_window2.png	2	6	2	1_ShearNormalized	2	FALSE	topic	correct	TRUE
654	f25374fe-651e-11e9-bb5a-44a84224eb5b	1	1	signals12St_FiberTapSt_Serv_1_ShearNormalized_37_window1.png	signals12St_FiberConstSt_Serv_1_ShearNormalized_37_window1.png	signals12St_FiberNomSt_DBE_1_ShearNormalized_37_window1.png	2.81	37	1	1_ShearNormalized	2	TRUE	heatmap	correct	TRUE
655	f25374fe-651e-11e9-bb5a-44a84224eb5b	2	2	signals12St_FiberNomSt_MCE_1_ShearNormalized_15_window2.png	signals12St_FiberTapSt_DBE_1_ShearNormalized_15_window2.png	signals12St_FiberConstSt_MCE_1_ShearNormalized_15_window2.png	5.23	15	2	1_ShearNormalized	4	TRUE	heatmap	correct	TRUE
656	f25374fe-651e-11e9-bb5a-44a84224eb5b	2	1	topics5_12St_BHinge_MCE_1_ShearNormalized_34_window1.png	topics5_12St_FiberNomSt_MCE_1_ShearNormalized_34_window1.png	topics5_12St_BHinge_Serv_1_ShearNormalized_34_window1.png	5.67	34	1	1_ShearNormalized	3	FALSE	topic	incorrect	FALSE
657	f25374fe-651e-11e9-bb5a-44a84224eb5b	2	2	topics5_12St_FiberConstSt_Serv_1_ShearNormalized_29_window0.png	topics5_12St_FiberNomSt_MCE_1_ShearNormalized_29_window0.png	topics5_12St_FiberTapSt_Serv_1_ShearNormalized_29_window0.png	5.35	29	0	1_ShearNormalized	2	FALSE	topic	correct	TRUE
658	f25374fe-651e-11e9-bb5a-44a84224eb5b	1	1	topics5_12St_BHinge_MCE_1_ShearNormalized_27_window1.png	topics5_12St_BHinge_DBE_1_ShearNormalized_27_window1.png	topics5_12St_FiberNomSt_MCE_1_ShearNormalized_27_window1.png	3.57	27	1	1_ShearNormalized	1	FALSE	topic	correct	TRUE
659	f25374fe-651e-11e9-bb5a-44a84224eb5b	2	2	topics5_12St_FiberTapSt_Serv_1_ShearNormalized_37_window1.png	topics5_12St_FiberNomSt_DBE_1_ShearNormalized_37_window1.png	topics5_12St_FiberConstSt_Serv_1_ShearNormalized_37_window1.png	4.42	37	1	1_ShearNormalized	2	FALSE	topic	correct	TRUE
660	f25374fe-651e-11e9-bb5a-44a84224eb5b	2	2	signals12St_FiberTapSt_MCE_1_ShearNormalized_34_window2.png	signals12St_FiberConstSt_DBE_1_ShearNormalized_34_window2.png	signals12St_FiberNomSt_MCE_1_ShearNormalized_34_window2.png	7.53	34	2	1_ShearNormalized	4	TRUE	heatmap	correct	TRUE
661	f25374fe-651e-11e9-bb5a-44a84224eb5b	2	2	topics5_12St_FiberTapSt_Serv_1_ShearNormalized_18_window2.png	topics5_12St_FiberNomSt_DBE_1_ShearNormalized_18_window2.png	topics5_12St_FiberConstSt_Serv_1_ShearNormalized_18_window2.png	8.63	18	2	1_ShearNormalized	2	FALSE	topic	correct	TRUE
662	f25374fe-651e-11e9-bb5a-44a84224eb5b	2	2	topics5_12St_FiberTapSt_Serv_1_ShearNormalized_26_window1.png	topics5_12St_FiberConstSt_MCE_1_ShearNormalized_26_window1.png	topics5_12St_FiberNomSt_Serv_1_ShearNormalized_26_window1.png	2.15	26	1	1_ShearNormalized	2	FALSE	topic	correct	TRUE
663	f25374fe-651e-11e9-bb5a-44a84224eb5b	1	1	topics5_12St_FiberTapSt_MCE_1_ShearNormalized_34_window2.png	topics5_12St_FiberNomSt_MCE_1_ShearNormalized_34_window2.png	topics5_12St_FiberConstSt_DBE_1_ShearNormalized_34_window2.png	3.35	34	2	1_ShearNormalized	4	FALSE	topic	correct	TRUE
664	f25374fe-651e-11e9-bb5a-44a84224eb5b	1	1	topics5_12St_BHinge_MCE_1_ShearNormalized_40_window1.png	topics5_12St_BHinge_MCE_1_ShearNormalized_40_window1.png	topics5_12St_FiberTapSt_MCE_1_ShearNormalized_40_window1.png	7.68	40	1	1_ShearNormalized	0	FALSE	topic	correct	TRUE
665	f25374fe-651e-11e9-bb5a-44a84224eb5b	2	1	signals12St_BHinge_MCE_1_ShearNormalized_27_window1.png	signals12St_FiberNomSt_MCE_1_ShearNormalized_27_window1.png	signals12St_BHinge_DBE_1_ShearNormalized_27_window1.png	6.13	27	1	1_ShearNormalized	1	TRUE	heatmap	incorrect	FALSE
666	f25374fe-651e-11e9-bb5a-44a84224eb5b	1	2	signals12St_BHinge_Serv_1_ShearNormalized_04_window0.png	signals12St_BHinge_MCE_1_ShearNormalized_04_window0.png	signals12St_FiberConstSt_Serv_1_ShearNormalized_04_window0.png	8.17	4	0	1_ShearNormalized	3	TRUE	heatmap	incorrect	FALSE
667	f25374fe-651e-11e9-bb5a-44a84224eb5b	1	1	topics5_12St_BHinge_MCE_1_ShearNormalized_12_window2.png	topics5_12St_BHinge_DBE_1_ShearNormalized_12_window2.png	topics5_12St_FiberNomSt_MCE_1_ShearNormalized_12_window2.png	3.57	12	2	1_ShearNormalized	1	FALSE	topic	correct	TRUE
668	f25374fe-651e-11e9-bb5a-44a84224eb5b	1	1	signals12St_FiberTapSt_Serv_1_ShearNormalized_40_window2.png	signals12St_FiberConstSt_Serv_1_ShearNormalized_40_window2.png	signals12St_FiberNomSt_MCE_1_ShearNormalized_40_window2.png	8.52	40	2	1_ShearNormalized	2	TRUE	heatmap	correct	TRUE
669	f25374fe-651e-11e9-bb5a-44a84224eb5b	1	1	topics5_12St_BHinge_DBE_1_ShearNormalized_48_window1.png	topics5_12St_BHinge_DBE_1_ShearNormalized_48_window1.png	topics5_12St_FiberTapSt_DBE_1_ShearNormalized_48_window1.png	7.87	48	1	1_ShearNormalized	0	FALSE	topic	correct	TRUE
670	f25374fe-651e-11e9-bb5a-44a84224eb5b	1	1	topics5_12St_FiberNomSt_MCE_1_ShearNormalized_15_window2.png	topics5_12St_FiberConstSt_MCE_1_ShearNormalized_15_window2.png	topics5_12St_FiberTapSt_DBE_1_ShearNormalized_15_window2.png	8.59	15	2	1_ShearNormalized	4	FALSE	topic	correct	TRUE
671	f25374fe-651e-11e9-bb5a-44a84224eb5b	1	2	signals12St_BHinge_MCE_1_ShearNormalized_30_window1.png	signals12St_BHinge_Serv_1_ShearNormalized_30_window1.png	signals12St_FiberNomSt_MCE_1_ShearNormalized_30_window1.png	4	30	1	1_ShearNormalized	3	TRUE	heatmap	incorrect	FALSE
672	f25374fe-651e-11e9-bb5a-44a84224eb5b	1	2	signals12St_BHinge_MCE_1_ShearNormalized_34_window1.png	signals12St_BHinge_Serv_1_ShearNormalized_34_window1.png	signals12St_FiberNomSt_MCE_1_ShearNormalized_34_window1.png	3.11	34	1	1_ShearNormalized	3	TRUE	heatmap	incorrect	FALSE
673	f25374fe-651e-11e9-bb5a-44a84224eb5b	2	2	signals12St_FiberConstSt_MCE_1_ShearNormalized_12_window0.png	signals12St_FiberNomSt_DBE_1_ShearNormalized_12_window0.png	signals12St_FiberTapSt_MCE_1_ShearNormalized_12_window0.png	3.53	12	0	1_ShearNormalized	4	TRUE	heatmap	correct	TRUE
674	f25374fe-651e-11e9-bb5a-44a84224eb5b	1	1	signals12St_FiberConstSt_Serv_1_ShearNormalized_29_window0.png	signals12St_FiberTapSt_Serv_1_ShearNormalized_29_window0.png	signals12St_FiberNomSt_MCE_1_ShearNormalized_29_window0.png	3.47	29	0	1_ShearNormalized	2	TRUE	heatmap	correct	TRUE
675	f25374fe-651e-11e9-bb5a-44a84224eb5b	2	1	topics5_12St_BHinge_MCE_1_ShearNormalized_30_window1.png	topics5_12St_FiberNomSt_MCE_1_ShearNormalized_30_window1.png	topics5_12St_BHinge_Serv_1_ShearNormalized_30_window1.png	7.48	30	1	1_ShearNormalized	3	FALSE	topic	incorrect	FALSE
676	f25374fe-651e-11e9-bb5a-44a84224eb5b	2	2	signals12St_BHinge_MCE_1_ShearNormalized_12_window2.png	signals12St_FiberNomSt_MCE_1_ShearNormalized_12_window2.png	signals12St_BHinge_DBE_1_ShearNormalized_12_window2.png	3.6	12	2	1_ShearNormalized	1	TRUE	heatmap	correct	TRUE
677	f25374fe-651e-11e9-bb5a-44a84224eb5b	2	2	topics5_12St_FiberTapSt_Serv_1_ShearNormalized_40_window2.png	topics5_12St_FiberNomSt_MCE_1_ShearNormalized_40_window2.png	topics5_12St_FiberConstSt_Serv_1_ShearNormalized_40_window2.png	6.81	40	2	1_ShearNormalized	2	FALSE	topic	correct	TRUE
678	f25374fe-651e-11e9-bb5a-44a84224eb5b	1	1	topics5_12St_FiberConstSt_MCE_1_ShearNormalized_37_window2.png	topics5_12St_FiberTapSt_MCE_1_ShearNormalized_37_window2.png	topics5_12St_FiberNomSt_DBE_1_ShearNormalized_37_window2.png	6.83	37	2	1_ShearNormalized	4	FALSE	topic	correct	TRUE
679	f25374fe-651e-11e9-bb5a-44a84224eb5b	1	1	signals12St_FiberTapSt_Serv_1_ShearNormalized_18_window2.png	signals12St_FiberConstSt_Serv_1_ShearNormalized_18_window2.png	signals12St_FiberNomSt_DBE_1_ShearNormalized_18_window2.png	4.95	18	2	1_ShearNormalized	2	TRUE	heatmap	correct	TRUE
680	f25374fe-651e-11e9-bb5a-44a84224eb5b	2	2	signals12St_BHinge_MCE_1_ShearNormalized_40_window1.png	signals12St_FiberTapSt_MCE_1_ShearNormalized_40_window1.png	signals12St_BHinge_MCE_1_ShearNormalized_40_window1.png	3.76	40	1	1_ShearNormalized	0	TRUE	heatmap	correct	TRUE
681	f25374fe-651e-11e9-bb5a-44a84224eb5b	2	2	signals12St_BHinge_DBE_1_ShearNormalized_48_window1.png	signals12St_FiberTapSt_DBE_1_ShearNormalized_48_window1.png	signals12St_BHinge_DBE_1_ShearNormalized_48_window1.png	4.74	48	1	1_ShearNormalized	0	TRUE	heatmap	correct	TRUE
682	f25374fe-651e-11e9-bb5a-44a84224eb5b	1	1	signals12St_FiberTapSt_Serv_1_ShearNormalized_26_window1.png	signals12St_FiberNomSt_Serv_1_ShearNormalized_26_window1.png	signals12St_FiberConstSt_MCE_1_ShearNormalized_26_window1.png	2.91	26	1	1_ShearNormalized	2	TRUE	heatmap	correct	TRUE
683	f4677532-6506-11e9-b566-44a84224eb5b	1	2	signals12St_BHinge_MCE_1_ShearNormalized_41_window2.png	signals12St_BHinge_Serv_1_ShearNormalized_41_window2.png	signals12St_FiberConstSt_MCE_1_ShearNormalized_41_window2.png	2.26	41	2	1_ShearNormalized	3	TRUE	heatmap	incorrect	FALSE
684	f4677532-6506-11e9-b566-44a84224eb5b	1	1	topics5_12St_BHinge_DBE_1_ShearNormalized_27_window2.png	topics5_12St_BHinge_DBE_1_ShearNormalized_27_window2.png	topics5_12St_FiberConstSt_DBE_1_ShearNormalized_27_window2.png	1.98	27	2	1_ShearNormalized	0	FALSE	topic	correct	TRUE
685	f4677532-6506-11e9-b566-44a84224eb5b	1	1	signals12St_BHinge_Serv_1_ShearNormalized_02_window1.png	signals12St_BHinge_DBE_1_ShearNormalized_02_window1.png	signals12St_FiberNomSt_Serv_1_ShearNormalized_02_window1.png	1.74	2	1	1_ShearNormalized	3	TRUE	heatmap	correct	TRUE
686	f4677532-6506-11e9-b566-44a84224eb5b	1	1	topics5_12St_FiberNomSt_MCE_1_ShearNormalized_40_window1.png	topics5_12St_FiberTapSt_MCE_1_ShearNormalized_40_window1.png	topics5_12St_FiberConstSt_DBE_1_ShearNormalized_40_window1.png	4.15	40	1	1_ShearNormalized	4	FALSE	topic	correct	TRUE
687	f4677532-6506-11e9-b566-44a84224eb5b	1	1	signals12St_FiberTapSt_Serv_1_ShearNormalized_06_window1.png	signals12St_FiberConstSt_Serv_1_ShearNormalized_06_window1.png	signals12St_FiberNomSt_DBE_1_ShearNormalized_06_window1.png	1.8	6	1	1_ShearNormalized	2	TRUE	heatmap	correct	TRUE
688	f4677532-6506-11e9-b566-44a84224eb5b	1	1	topics5_12St_BHinge_DBE_1_ShearNormalized_28_window2.png	topics5_12St_BHinge_MCE_1_ShearNormalized_28_window2.png	topics5_12St_FiberTapSt_DBE_1_ShearNormalized_28_window2.png	2.47	28	2	1_ShearNormalized	1	FALSE	topic	correct	TRUE
689	f4677532-6506-11e9-b566-44a84224eb5b	2	2	signals12St_BHinge_DBE_1_ShearNormalized_27_window2.png	signals12St_FiberConstSt_DBE_1_ShearNormalized_27_window2.png	signals12St_BHinge_DBE_1_ShearNormalized_27_window2.png	2.59	27	2	1_ShearNormalized	0	TRUE	heatmap	correct	TRUE
690	f4677532-6506-11e9-b566-44a84224eb5b	2	1	topics5_12St_BHinge_Serv_1_ShearNormalized_02_window1.png	topics5_12St_FiberNomSt_Serv_1_ShearNormalized_02_window1.png	topics5_12St_BHinge_DBE_1_ShearNormalized_02_window1.png	7.73	2	1	1_ShearNormalized	3	FALSE	topic	incorrect	FALSE
691	f4677532-6506-11e9-b566-44a84224eb5b	2	2	topics5_12St_FiberTapSt_Serv_1_ShearNormalized_06_window1.png	topics5_12St_FiberNomSt_DBE_1_ShearNormalized_06_window1.png	topics5_12St_FiberConstSt_Serv_1_ShearNormalized_06_window1.png	1.47	6	1	1_ShearNormalized	2	FALSE	topic	correct	TRUE
692	f4677532-6506-11e9-b566-44a84224eb5b	2	1	topics5_12St_BHinge_MCE_1_ShearNormalized_12_window2.png	topics5_12St_FiberConstSt_MCE_1_ShearNormalized_12_window2.png	topics5_12St_BHinge_Serv_1_ShearNormalized_12_window2.png	8.99	12	2	1_ShearNormalized	3	FALSE	topic	incorrect	FALSE
693	f4677532-6506-11e9-b566-44a84224eb5b	2	2	signals12St_FiberTapSt_MCE_1_ShearNormalized_15_window1.png	signals12St_FiberConstSt_DBE_1_ShearNormalized_15_window1.png	signals12St_FiberNomSt_MCE_1_ShearNormalized_15_window1.png	4.68	15	1	1_ShearNormalized	4	TRUE	heatmap	correct	TRUE
694	f4677532-6506-11e9-b566-44a84224eb5b	2	2	signals12St_BHinge_DBE_1_ShearNormalized_28_window2.png	signals12St_FiberTapSt_DBE_1_ShearNormalized_28_window2.png	signals12St_BHinge_MCE_1_ShearNormalized_28_window2.png	6.6	28	2	1_ShearNormalized	1	TRUE	heatmap	correct	TRUE
695	f4677532-6506-11e9-b566-44a84224eb5b	2	2	topics5_12St_FiberTapSt_Serv_1_ShearNormalized_17_window1.png	topics5_12St_FiberConstSt_DBE_1_ShearNormalized_17_window1.png	topics5_12St_FiberNomSt_Serv_1_ShearNormalized_17_window1.png	2.45	17	1	1_ShearNormalized	2	FALSE	topic	correct	TRUE
696	f4677532-6506-11e9-b566-44a84224eb5b	1	1	topics5_12St_FiberTapSt_MCE_1_ShearNormalized_15_window1.png	topics5_12St_FiberNomSt_MCE_1_ShearNormalized_15_window1.png	topics5_12St_FiberConstSt_DBE_1_ShearNormalized_15_window1.png	1.97	15	1	1_ShearNormalized	4	FALSE	topic	correct	TRUE
697	f4677532-6506-11e9-b566-44a84224eb5b	2	2	signals12St_BHinge_DBE_1_ShearNormalized_04_window0.png	signals12St_FiberTapSt_DBE_1_ShearNormalized_04_window0.png	signals12St_BHinge_MCE_1_ShearNormalized_04_window0.png	8.89	4	0	1_ShearNormalized	1	TRUE	heatmap	correct	TRUE
698	f4677532-6506-11e9-b566-44a84224eb5b	1	2	signals12St_BHinge_Serv_1_ShearNormalized_01_window0.png	signals12St_BHinge_DBE_1_ShearNormalized_01_window0.png	signals12St_FiberTapSt_Serv_1_ShearNormalized_01_window0.png	3.6	1	0	1_ShearNormalized	3	TRUE	heatmap	incorrect	FALSE
699	f4677532-6506-11e9-b566-44a84224eb5b	1	1	topics5_12St_BHinge_MCE_1_ShearNormalized_05_window2.png	topics5_12St_BHinge_MCE_1_ShearNormalized_05_window2.png	topics5_12St_FiberNomSt_MCE_1_ShearNormalized_05_window2.png	1.34	5	2	1_ShearNormalized	0	FALSE	topic	correct	TRUE
700	f4677532-6506-11e9-b566-44a84224eb5b	2	2	topics5_12St_BHinge_MCE_1_ShearNormalized_09_window1.png	topics5_12St_FiberTapSt_MCE_1_ShearNormalized_09_window1.png	topics5_12St_BHinge_Serv_1_ShearNormalized_09_window1.png	4.13	9	1	1_ShearNormalized	3	FALSE	topic	correct	TRUE
701	f4677532-6506-11e9-b566-44a84224eb5b	2	2	signals12St_FiberNomSt_MCE_1_ShearNormalized_28_window1.png	signals12St_FiberConstSt_DBE_1_ShearNormalized_28_window1.png	signals12St_FiberTapSt_MCE_1_ShearNormalized_28_window1.png	2.79	28	1	1_ShearNormalized	4	TRUE	heatmap	correct	TRUE
702	f4677532-6506-11e9-b566-44a84224eb5b	2	2	signals12St_BHinge_MCE_1_ShearNormalized_05_window2.png	signals12St_FiberNomSt_MCE_1_ShearNormalized_05_window2.png	signals12St_BHinge_MCE_1_ShearNormalized_05_window2.png	3.5	5	2	1_ShearNormalized	0	TRUE	heatmap	correct	TRUE
703	f4677532-6506-11e9-b566-44a84224eb5b	2	1	topics5_12St_BHinge_MCE_1_ShearNormalized_41_window2.png	topics5_12St_FiberConstSt_MCE_1_ShearNormalized_41_window2.png	topics5_12St_BHinge_Serv_1_ShearNormalized_41_window2.png	2.25	41	2	1_ShearNormalized	3	FALSE	topic	incorrect	FALSE
704	f4677532-6506-11e9-b566-44a84224eb5b	1	1	topics5_12St_FiberNomSt_MCE_1_ShearNormalized_28_window1.png	topics5_12St_FiberTapSt_MCE_1_ShearNormalized_28_window1.png	topics5_12St_FiberConstSt_DBE_1_ShearNormalized_28_window1.png	1.8	28	1	1_ShearNormalized	4	FALSE	topic	correct	TRUE
705	f4677532-6506-11e9-b566-44a84224eb5b	2	2	topics5_12St_BHinge_MCE_1_ShearNormalized_02_window0.png	topics5_12St_FiberNomSt_MCE_1_ShearNormalized_02_window0.png	topics5_12St_BHinge_Serv_1_ShearNormalized_02_window0.png	6.02	2	0	1_ShearNormalized	3	FALSE	topic	correct	TRUE
706	f4677532-6506-11e9-b566-44a84224eb5b	1	1	topics5_12St_BHinge_DBE_1_ShearNormalized_04_window0.png	topics5_12St_BHinge_MCE_1_ShearNormalized_04_window0.png	topics5_12St_FiberTapSt_DBE_1_ShearNormalized_04_window0.png	3.36	4	0	1_ShearNormalized	1	FALSE	topic	correct	TRUE
707	f4677532-6506-11e9-b566-44a84224eb5b	1	2	signals12St_BHinge_MCE_1_ShearNormalized_12_window2.png	signals12St_BHinge_Serv_1_ShearNormalized_12_window2.png	signals12St_FiberConstSt_MCE_1_ShearNormalized_12_window2.png	1.5	12	2	1_ShearNormalized	3	TRUE	heatmap	incorrect	FALSE
708	f4677532-6506-11e9-b566-44a84224eb5b	2	1	signals12St_FiberNomSt_MCE_1_ShearNormalized_40_window1.png	signals12St_FiberConstSt_DBE_1_ShearNormalized_40_window1.png	signals12St_FiberTapSt_MCE_1_ShearNormalized_40_window1.png	7.34	40	1	1_ShearNormalized	4	TRUE	heatmap	incorrect	FALSE
709	f4677532-6506-11e9-b566-44a84224eb5b	1	1	signals12St_FiberTapSt_Serv_1_ShearNormalized_44_window1.png	signals12St_FiberConstSt_Serv_1_ShearNormalized_44_window1.png	signals12St_FiberNomSt_DBE_1_ShearNormalized_44_window1.png	1.78	44	1	1_ShearNormalized	2	TRUE	heatmap	correct	TRUE
710	f4677532-6506-11e9-b566-44a84224eb5b	1	2	signals12St_BHinge_MCE_1_ShearNormalized_09_window1.png	signals12St_BHinge_Serv_1_ShearNormalized_09_window1.png	signals12St_FiberTapSt_MCE_1_ShearNormalized_09_window1.png	2.69	9	1	1_ShearNormalized	3	TRUE	heatmap	incorrect	FALSE
711	f4677532-6506-11e9-b566-44a84224eb5b	1	1	signals12St_FiberTapSt_Serv_1_ShearNormalized_17_window1.png	signals12St_FiberNomSt_Serv_1_ShearNormalized_17_window1.png	signals12St_FiberConstSt_DBE_1_ShearNormalized_17_window1.png	1.24	17	1	1_ShearNormalized	2	TRUE	heatmap	correct	TRUE
712	f4677532-6506-11e9-b566-44a84224eb5b	2	2	topics5_12St_BHinge_Serv_1_ShearNormalized_01_window0.png	topics5_12St_FiberTapSt_Serv_1_ShearNormalized_01_window0.png	topics5_12St_BHinge_DBE_1_ShearNormalized_01_window0.png	5.15	1	0	1_ShearNormalized	3	FALSE	topic	correct	TRUE
713	f4677532-6506-11e9-b566-44a84224eb5b	1	1	topics5_12St_BHinge_DBE_1_ShearNormalized_08_window0.png	topics5_12St_BHinge_MCE_1_ShearNormalized_08_window0.png	topics5_12St_FiberTapSt_DBE_1_ShearNormalized_08_window0.png	4.79	8	0	1_ShearNormalized	1	FALSE	topic	correct	TRUE
714	f4677532-6506-11e9-b566-44a84224eb5b	1	2	signals12St_BHinge_MCE_1_ShearNormalized_02_window0.png	signals12St_BHinge_Serv_1_ShearNormalized_02_window0.png	signals12St_FiberNomSt_MCE_1_ShearNormalized_02_window0.png	1.33	2	0	1_ShearNormalized	3	TRUE	heatmap	incorrect	FALSE
715	f4677532-6506-11e9-b566-44a84224eb5b	2	2	topics5_12St_FiberTapSt_Serv_1_ShearNormalized_44_window1.png	topics5_12St_FiberNomSt_DBE_1_ShearNormalized_44_window1.png	topics5_12St_FiberConstSt_Serv_1_ShearNormalized_44_window1.png	1.37	44	1	1_ShearNormalized	2	FALSE	topic	correct	TRUE
716	f4677532-6506-11e9-b566-44a84224eb5b	2	1	signals12St_BHinge_DBE_1_ShearNormalized_08_window0.png	signals12St_FiberTapSt_DBE_1_ShearNormalized_08_window0.png	signals12St_BHinge_MCE_1_ShearNormalized_08_window0.png	11.06	8	0	1_ShearNormalized	1	TRUE	heatmap	incorrect	FALSE
717	f844cac2-62d3-11e9-87a7-44a84224eb5b	2	2	signals12St_BHinge_DBE_1_ShearNormalized_37_window0.png	signals12St_FiberConstSt_DBE_1_ShearNormalized_37_window0.png	signals12St_BHinge_MCE_1_ShearNormalized_37_window0.png	2.87	37	0	1_ShearNormalized	1	TRUE	heatmap	correct	TRUE
718	f844cac2-62d3-11e9-87a7-44a84224eb5b	2	2	topics5_12St_FiberConstSt_Serv_1_ShearNormalized_36_window2.png	topics5_12St_FiberTapSt_DBE_1_ShearNormalized_36_window2.png	topics5_12St_FiberNomSt_Serv_1_ShearNormalized_36_window2.png	1.78	36	2	1_ShearNormalized	2	FALSE	topic	correct	TRUE
719	f844cac2-62d3-11e9-87a7-44a84224eb5b	2	2	signals12St_BHinge_DBE_1_ShearNormalized_23_window2.png	signals12St_FiberTapSt_DBE_1_ShearNormalized_23_window2.png	signals12St_BHinge_DBE_1_ShearNormalized_23_window2.png	2.31	23	2	1_ShearNormalized	0	TRUE	heatmap	correct	TRUE
720	f844cac2-62d3-11e9-87a7-44a84224eb5b	1	2	signals12St_BHinge_Serv_1_ShearNormalized_03_window0.png	signals12St_BHinge_MCE_1_ShearNormalized_03_window0.png	signals12St_FiberConstSt_Serv_1_ShearNormalized_03_window0.png	1.89	3	0	1_ShearNormalized	3	TRUE	heatmap	incorrect	FALSE
721	f844cac2-62d3-11e9-87a7-44a84224eb5b	1	1	topics5_12St_FiberConstSt_MCE_1_ShearNormalized_21_window1.png	topics5_12St_FiberTapSt_MCE_1_ShearNormalized_21_window1.png	topics5_12St_FiberNomSt_DBE_1_ShearNormalized_21_window1.png	2.39	21	1	1_ShearNormalized	4	FALSE	topic	correct	TRUE
722	f844cac2-62d3-11e9-87a7-44a84224eb5b	2	2	topics5_12St_FiberTapSt_Serv_1_ShearNormalized_35_window2.png	topics5_12St_FiberConstSt_DBE_1_ShearNormalized_35_window2.png	topics5_12St_FiberNomSt_Serv_1_ShearNormalized_35_window2.png	1.31	35	2	1_ShearNormalized	2	FALSE	topic	correct	TRUE
723	f844cac2-62d3-11e9-87a7-44a84224eb5b	2	2	signals12St_FiberTapSt_MCE_1_ShearNormalized_47_window1.png	signals12St_FiberConstSt_DBE_1_ShearNormalized_47_window1.png	signals12St_FiberNomSt_MCE_1_ShearNormalized_47_window1.png	2.8	47	1	1_ShearNormalized	4	TRUE	heatmap	correct	TRUE
724	f844cac2-62d3-11e9-87a7-44a84224eb5b	1	1	topics5_12St_BHinge_DBE_1_ShearNormalized_23_window2.png	topics5_12St_BHinge_DBE_1_ShearNormalized_23_window2.png	topics5_12St_FiberTapSt_DBE_1_ShearNormalized_23_window2.png	1.5	23	2	1_ShearNormalized	0	FALSE	topic	correct	TRUE
725	f844cac2-62d3-11e9-87a7-44a84224eb5b	2	2	topics5_12St_FiberConstSt_Serv_1_ShearNormalized_34_window1.png	topics5_12St_FiberTapSt_DBE_1_ShearNormalized_34_window1.png	topics5_12St_FiberNomSt_Serv_1_ShearNormalized_34_window1.png	1.74	34	1	1_ShearNormalized	2	FALSE	topic	correct	TRUE
726	f844cac2-62d3-11e9-87a7-44a84224eb5b	1	1	signals12St_BHinge_DBE_1_ShearNormalized_30_window1.png	signals12St_BHinge_Serv_1_ShearNormalized_30_window1.png	signals12St_FiberTapSt_DBE_1_ShearNormalized_30_window1.png	7.28	30	1	1_ShearNormalized	3	TRUE	heatmap	correct	TRUE
727	f844cac2-62d3-11e9-87a7-44a84224eb5b	2	1	signals12St_BHinge_MCE_1_ShearNormalized_15_window0.png	signals12St_FiberNomSt_MCE_1_ShearNormalized_15_window0.png	signals12St_BHinge_DBE_1_ShearNormalized_15_window0.png	2.32	15	0	1_ShearNormalized	1	TRUE	heatmap	incorrect	FALSE
728	f844cac2-62d3-11e9-87a7-44a84224eb5b	2	1	topics5_12St_BHinge_DBE_1_ShearNormalized_30_window1.png	topics5_12St_FiberTapSt_DBE_1_ShearNormalized_30_window1.png	topics5_12St_BHinge_Serv_1_ShearNormalized_30_window1.png	7.03	30	1	1_ShearNormalized	3	FALSE	topic	incorrect	FALSE
729	f844cac2-62d3-11e9-87a7-44a84224eb5b	2	2	topics5_12St_BHinge_Serv_1_ShearNormalized_03_window0.png	topics5_12St_FiberConstSt_Serv_1_ShearNormalized_03_window0.png	topics5_12St_BHinge_MCE_1_ShearNormalized_03_window0.png	3	3	0	1_ShearNormalized	3	FALSE	topic	correct	TRUE
730	f844cac2-62d3-11e9-87a7-44a84224eb5b	1	1	signals12St_FiberConstSt_Serv_1_ShearNormalized_08_window2.png	signals12St_FiberNomSt_Serv_1_ShearNormalized_08_window2.png	signals12St_FiberTapSt_MCE_1_ShearNormalized_08_window2.png	2.21	8	2	1_ShearNormalized	2	TRUE	heatmap	correct	TRUE
731	f844cac2-62d3-11e9-87a7-44a84224eb5b	1	1	topics5_12St_BHinge_DBE_1_ShearNormalized_37_window0.png	topics5_12St_BHinge_MCE_1_ShearNormalized_37_window0.png	topics5_12St_FiberConstSt_DBE_1_ShearNormalized_37_window0.png	1.54	37	0	1_ShearNormalized	1	FALSE	topic	correct	TRUE
732	f844cac2-62d3-11e9-87a7-44a84224eb5b	1	1	signals12St_FiberConstSt_Serv_1_ShearNormalized_36_window2.png	signals12St_FiberNomSt_Serv_1_ShearNormalized_36_window2.png	signals12St_FiberTapSt_DBE_1_ShearNormalized_36_window2.png	2	36	2	1_ShearNormalized	2	TRUE	heatmap	correct	TRUE
733	f844cac2-62d3-11e9-87a7-44a84224eb5b	2	2	signals12St_BHinge_DBE_1_ShearNormalized_13_window2.png	signals12St_FiberTapSt_DBE_1_ShearNormalized_13_window2.png	signals12St_BHinge_DBE_1_ShearNormalized_13_window2.png	1.5	13	2	1_ShearNormalized	0	TRUE	heatmap	correct	TRUE
734	f844cac2-62d3-11e9-87a7-44a84224eb5b	1	2	signals12St_BHinge_Serv_1_ShearNormalized_44_window0.png	signals12St_BHinge_MCE_1_ShearNormalized_44_window0.png	signals12St_FiberConstSt_Serv_1_ShearNormalized_44_window0.png	1.94	44	0	1_ShearNormalized	3	TRUE	heatmap	incorrect	FALSE
735	f844cac2-62d3-11e9-87a7-44a84224eb5b	1	2	topics5_12St_FiberTapSt_MCE_1_ShearNormalized_47_window1.png	topics5_12St_FiberNomSt_MCE_1_ShearNormalized_47_window1.png	topics5_12St_FiberConstSt_DBE_1_ShearNormalized_47_window1.png	1.36	47	1	1_ShearNormalized	4	FALSE	topic	incorrect	FALSE
736	f844cac2-62d3-11e9-87a7-44a84224eb5b	1	1	signals12St_FiberNomSt_Serv_1_ShearNormalized_05_window0.png	signals12St_FiberTapSt_Serv_1_ShearNormalized_05_window0.png	signals12St_FiberConstSt_DBE_1_ShearNormalized_05_window0.png	4.01	5	0	1_ShearNormalized	2	TRUE	heatmap	correct	TRUE
737	f844cac2-62d3-11e9-87a7-44a84224eb5b	1	1	topics5_12St_BHinge_DBE_1_ShearNormalized_23_window1.png	topics5_12St_BHinge_MCE_1_ShearNormalized_23_window1.png	topics5_12St_FiberTapSt_DBE_1_ShearNormalized_23_window1.png	2.78	23	1	1_ShearNormalized	1	FALSE	topic	correct	TRUE
738	f844cac2-62d3-11e9-87a7-44a84224eb5b	2	2	topics5_12St_BHinge_Serv_1_ShearNormalized_44_window0.png	topics5_12St_FiberConstSt_Serv_1_ShearNormalized_44_window0.png	topics5_12St_BHinge_MCE_1_ShearNormalized_44_window0.png	7.12	44	0	1_ShearNormalized	3	FALSE	topic	correct	TRUE
739	f844cac2-62d3-11e9-87a7-44a84224eb5b	1	1	topics5_12St_BHinge_DBE_1_ShearNormalized_13_window2.png	topics5_12St_BHinge_DBE_1_ShearNormalized_13_window2.png	topics5_12St_FiberTapSt_DBE_1_ShearNormalized_13_window2.png	2.33	13	2	1_ShearNormalized	0	FALSE	topic	correct	TRUE
740	f844cac2-62d3-11e9-87a7-44a84224eb5b	1	2	signals12St_BHinge_DBE_1_ShearNormalized_43_window2.png	signals12St_BHinge_Serv_1_ShearNormalized_43_window2.png	signals12St_FiberConstSt_DBE_1_ShearNormalized_43_window2.png	2.86	43	2	1_ShearNormalized	3	TRUE	heatmap	incorrect	FALSE
741	f844cac2-62d3-11e9-87a7-44a84224eb5b	2	2	topics5_12St_FiberConstSt_Serv_1_ShearNormalized_08_window2.png	topics5_12St_FiberTapSt_MCE_1_ShearNormalized_08_window2.png	topics5_12St_FiberNomSt_Serv_1_ShearNormalized_08_window2.png	1.41	8	2	1_ShearNormalized	2	FALSE	topic	correct	TRUE
742	f844cac2-62d3-11e9-87a7-44a84224eb5b	1	1	signals12St_FiberConstSt_Serv_1_ShearNormalized_34_window1.png	signals12St_FiberNomSt_Serv_1_ShearNormalized_34_window1.png	signals12St_FiberTapSt_DBE_1_ShearNormalized_34_window1.png	3.24	34	1	1_ShearNormalized	2	TRUE	heatmap	correct	TRUE
743	f844cac2-62d3-11e9-87a7-44a84224eb5b	1	1	topics5_12St_BHinge_MCE_1_ShearNormalized_15_window0.png	topics5_12St_BHinge_DBE_1_ShearNormalized_15_window0.png	topics5_12St_FiberNomSt_MCE_1_ShearNormalized_15_window0.png	2.73	15	0	1_ShearNormalized	1	FALSE	topic	correct	TRUE
744	f844cac2-62d3-11e9-87a7-44a84224eb5b	2	1	topics5_12St_BHinge_MCE_1_ShearNormalized_47_window1.png	topics5_12St_FiberNomSt_MCE_1_ShearNormalized_47_window1.png	topics5_12St_BHinge_Serv_1_ShearNormalized_47_window1.png	6.62	47	1	1_ShearNormalized	3	FALSE	topic	incorrect	FALSE
745	f844cac2-62d3-11e9-87a7-44a84224eb5b	2	1	topics5_12St_BHinge_DBE_1_ShearNormalized_43_window2.png	topics5_12St_FiberConstSt_DBE_1_ShearNormalized_43_window2.png	topics5_12St_BHinge_Serv_1_ShearNormalized_43_window2.png	7.64	43	2	1_ShearNormalized	3	FALSE	topic	incorrect	FALSE
746	f844cac2-62d3-11e9-87a7-44a84224eb5b	1	2	signals12St_BHinge_MCE_1_ShearNormalized_47_window1.png	signals12St_BHinge_Serv_1_ShearNormalized_47_window1.png	signals12St_FiberNomSt_MCE_1_ShearNormalized_47_window1.png	5.18	47	1	1_ShearNormalized	3	TRUE	heatmap	incorrect	FALSE
747	f844cac2-62d3-11e9-87a7-44a84224eb5b	2	2	topics5_12St_FiberNomSt_Serv_1_ShearNormalized_05_window0.png	topics5_12St_FiberConstSt_DBE_1_ShearNormalized_05_window0.png	topics5_12St_FiberTapSt_Serv_1_ShearNormalized_05_window0.png	2.6	5	0	1_ShearNormalized	2	FALSE	topic	correct	TRUE
748	f844cac2-62d3-11e9-87a7-44a84224eb5b	2	2	signals12St_BHinge_DBE_1_ShearNormalized_23_window1.png	signals12St_FiberTapSt_DBE_1_ShearNormalized_23_window1.png	signals12St_BHinge_MCE_1_ShearNormalized_23_window1.png	2.01	23	1	1_ShearNormalized	1	TRUE	heatmap	correct	TRUE
749	f844cac2-62d3-11e9-87a7-44a84224eb5b	1	1	signals12St_FiberTapSt_Serv_1_ShearNormalized_35_window2.png	signals12St_FiberNomSt_Serv_1_ShearNormalized_35_window2.png	signals12St_FiberConstSt_DBE_1_ShearNormalized_35_window2.png	2.01	35	2	1_ShearNormalized	2	TRUE	heatmap	correct	TRUE
750	f844cac2-62d3-11e9-87a7-44a84224eb5b	2	2	signals12St_FiberConstSt_MCE_1_ShearNormalized_21_window1.png	signals12St_FiberNomSt_DBE_1_ShearNormalized_21_window1.png	signals12St_FiberTapSt_MCE_1_ShearNormalized_21_window1.png	1.49	21	1	1_ShearNormalized	4	TRUE	heatmap	correct	TRUE
